# Supplementary material
Source: publisher figshare collection journal article supplement (https://rs.figshare.com/ndownloader/files/38915510)
Supplement: Supplementary file 1 [file 38915510]

## Sheet: Data
Scientific name	Basionym	Basionym year	Year of accepted name	Authors	Natural distribution	Original Reference	China endemic species	First author of biosynoms	Chinese first author	Full name
Abelmoschus manihot	Hibiscus manihot	1753	1787	(L.) Medik.	Bangladesh, China North-Central, China South-Central, China Southeast, India, Maluku, Myanmar, Nepal, Sulawesi, Vietnam	Malvenfam.: 46 (1787)	0	L.	0	Linné, Carl von;Linnaeus, Carl
Acalypha australis		1753	1753	L.	China North-Central, China South-Central, China Southeast, East Himalaya, Hainan, Inner Mongolia, Japan, Korea, Laos, Manchuria, Nansei-shoto, Philippines, Primorye, Qinghai, South China Sea, Taiwan, Tibet, Vietnam	Sp. Pl.: 1004 (1753)	0	L.	0	Linné, Carl von;Linnaeus, Carl
Acalypha indica		1753	1753	L.	Andaman Is., Angola, Assam, Bangladesh, Botswana, Cambodia, Cape Provinces, Djibouti, Eritrea, Ethiopia, Hainan, India, Jawa, Kenya, KwaZulu-Natal, Laccadive Is., Lesser Sunda Is., Malawi, Malaya, Maldives, Maluku, Marianas, Mozambique, Myanmar, Namibia, Nansei-shoto, Nepal, New Guinea, Nicobar Is., Northern Provinces, Oman, Pakistan, Philippines, Saudi Arabia, Socotra, Somalia, South China Sea, …	Sp. Pl.: 1003 (1753)	0	L.	0	Linné, Carl von;Linnaeus, Carl
Acanthus ilicifolius		1753	1753	L.	Andaman Is., Bangladesh, Cambodia, China Southeast, Hainan, India, Laos, Lesser Sunda Is., Malaya, Myanmar, New Caledonia, New Guinea, Nicobar Is., Northern Territory, Philippines, Queensland, Santa Cruz Is., Solomon Is., Sri Lanka, Thailand, Vanuatu, Vietnam	Sp. Pl.: 639 (1753)	0	L.	0	Linné, Carl von;Linnaeus, Carl
Achillea alpina		1753	1753	L.	Amur, Buryatiya, China North-Central, China South-Central, China Southeast, Chita, Inner Mongolia, Irkutsk, Japan, Kamchatka, Khabarovsk, Korea, Krasnoyarsk, Kuril Is., Magadan, Manchuria, Mongolia, Nepal, Primorye, Qinghai, Sakhalin, Tuva, Yakutskiya	Sp. Pl.: 899 (1753)	0	L.	0	Linné, Carl von;Linnaeus, Carl
Achillea impatiens		1753	1753	L.	Altay, Buryatiya, Chita, Irkutsk, Kazakhstan, Krasnoyarsk, Mongolia, Romania, Tuva, West Siberia, Xinjiang, Yakutskiya	Sp. Pl.: 898 (1753)	0	L.	0	Linné, Carl von;Linnaeus, Carl
Achillea nobilis		1753	1753	L.	Altay, Austria, Baltic States, Belarus, Chita, Czechoslovakia, East European Russia, France, Germany, Great Britain, Hungary, Irkutsk, Italy, Kazakhstan, Krasnoyarsk, Krym, North Caucasus, Northwest European R, Spain, Switzerland, Tadzhikistan, Transcaucasus, Uzbekistan, West Siberia, Xinjiang, Yugoslavia	Sp. Pl.: 899 (1753)	0	L.	0	Linné, Carl von;Linnaeus, Carl
Achnatherum sibiricum	Avena sibirica	1753	1977	(L.) Keng ex Tzvelev	Afghanistan, Altay, Amur, Buryatiya, China South-Central, China Southeast, Chita, Inner Mongolia, Irkutsk, Kazakhstan, Khabarovsk, Kirgizstan, Korea, Krasnoyarsk, Manchuria, Mongolia, Nepal, North Caucasus, Pakistan, Qinghai, Tibet, Tuva, Uzbekistan, West Himalaya, West Siberia, Xinjiang	Probl. Ekol. Geobot. Bot. Geogr. Florist.: 140 (1977)	0	L.	0	Linné, Carl von;Linnaeus, Carl
Achyranthes aspera		1753	1753	L.	Afghanistan, Andaman Is., Angola, Assam, Bangladesh, Benin, Bismarck Archipelago, Borneo, Botswana, Burkina, Burundi, Cambodia, Cameroon, Canary Is., Cape Provinces, Cape Verde, Central African Repu, Chad, China South-Central, China Southeast, Christmas I., Cocos (Keeling) Is., Congo, Djibouti, East Himalaya, Free State, Gabon, Gambia, Ghana, Guinea, Guinea-Bissau, Gulf of Guinea Is., Gulf States…	Sp. Pl.: 204 (1753)	0	L.	0	Linné, Carl von;Linnaeus, Carl
Aconitum anthora		1753	1753	L.	Altay, Austria, Baltic States, Central European Rus, Czechoslovakia, East European Russia, France, Hungary, Kazakhstan, Krasnoyarsk, Krym, Mongolia, North Caucasus, Romania, South European Russi, Spain, Switzerland, Transcaucasus, Turkey, Tuva, Ukraine, West Siberia, Xinjiang, Yugoslavia	Sp. Pl.: 532 (1753)	0	L.	0	Linné, Carl von;Linnaeus, Carl
Acorus calamus		1753	1753	L.	Alaska, Alberta, Altay, Amur, Assam, Bangladesh, Borneo, British Columbia, Buryatiya, Cambodia, China North-Central, China South-Central, China Southeast, Chita, Connecticut, East Himalaya, Hainan, Idaho, India, Inner Mongolia, Iowa, Irkutsk, Japan, Jawa, Kamchatka, Kansas, Kazakhstan, Khabarovsk, Kirgizstan, Korea, Krasnoyarsk, Kuril Is., Laccadive Is., Lesser Sunda Is., Maine, Malaya, Maldives,…	Sp. Pl.: 324 (1753)	0	L.	0	Linné, Carl von;Linnaeus, Carl
Acronychia pedunculata	Jambolifera pedunculata	1753	1861	(L.) Miq.	Andaman Is., Assam, Bangladesh, Borneo, Cambodia, China South-Central, China Southeast, East Himalaya, Hainan, India, Jawa, Laos, Malaya, Myanmar, New Guinea, Nicobar Is., Philippines, Sri Lanka, Sulawesi, Sumatera, Taiwan, Thailand, Vietnam, West Himalaya	Fl. Ned. Ind., Eerste Bijv.: 532 (1861)	0	L.	0	Linné, Carl von;Linnaeus, Carl
Acrostichum aureum		1753	1753	L.	Andaman Is., Angola, Bahamas, Bangladesh, Belize, Bismarck Archipelago, Brazil Northeast, Brazil South, Brazil Southeast, Cambodia, Cameroon, Cape Provinces, Caroline Is., Cayman Is., Central American Pac, China South-Central, China Southeast, Colombia, Comoros, Cook Is., Costa Rica, Cuba, Dominican Republic, Ecuador, Equatorial Guinea, Fiji, Florida, French Guiana, Gabon, Galápagos, Gambia, Ghan…	Sp. Pl.: 1069 (1753)	0	L.	0	Linné, Carl von;Linnaeus, Carl
Actaea cimicifuga		1753	1753	L.	Altay, Buryatiya, China North-Central, China South-Central, China Southeast, Chita, East Himalaya, Irkutsk, Kazakhstan, Korea, Krasnoyarsk, Mongolia, Myanmar, Tibet, Tuva, West Siberia, Yakutskiya	Sp. Pl.: 504 (1753)	0	L.	0	Linné, Carl von;Linnaeus, Carl
Actinostachys digitata	Acrostichum digitatum	1753	1829	(L.) Wall.	Andaman Is., Assam, Bangladesh, Borneo, Cambodia, Caroline Is., China South-Central, China Southeast, Hainan, India, Malaya, Maluku, Myanmar, Nansei-shoto, New Guinea, Nicobar Is., Northern Territory, Ogasawara-shoto, Philippines, Queensland, Seychelles, Solomon Is., Sulawesi, Sumatera, Taiwan, Thailand, Tonga, Vietnam, Western Australia	Numer. List: n.° 1 (1829)	0	L.	0	Linné, Carl von;Linnaeus, Carl
Adenophora liliifolia	Campanula lilifolia	1753	1830	(L.) A.DC.	Altay, Austria, Baltic States, Belarus, Central European Rus, Czechoslovakia, East European Russia, Germany, Hungary, Italy, Kazakhstan, Kirgizstan, Krasnoyarsk, Poland, Romania, South European Russi, Switzerland, Ukraine, West Siberia, Xinjiang, Yugoslavia	Monogr. Campan.: 358 (1830)	0	L.	0	Linné, Carl von;Linnaeus, Carl
Adenosma glutinosa	Gerardia glutinosa	1753	1913	(L.) Druce	Assam, Bangladesh, Borneo, Cambodia, China South-Central, China Southeast, Hainan, Jawa, Laos, Malaya, Myanmar, Queensland, Thailand, Vietnam	Rep. Bot. Exch. Club Soc. Brit. Isles 3: 413 (1913 publ. 1914)	0	L.	0	Linné, Carl von;Linnaeus, Carl
Adiantum capillus-veneris		1753	1753	L.	Afghanistan, Alabama, Albania, Algeria, Angola, Arizona, Arkansas, Assam, Azores, Bahamas, Baleares, Bangladesh, Belize, Botswana, Brazil North, Brazil Northeast, Brazil South, Brazil Southeast, British Columbia, Bulgaria, California, Cambodia, Canary Is., Cape Provinces, Cape Verde, Chad, Chile Central, Chile North, China North-Central, China South-Central, China Southeast, Colorado, Comoros, Co…	Sp. Pl.: 1096 (1753)	0	L.	0	Linné, Carl von;Linnaeus, Carl
Adiantum flabellulatum		1753	1753	L.	Assam, Bangladesh, Cambodia, China South-Central, China Southeast, Hainan, Japan, Laos, Lesser Sunda Is., Malaya, Myanmar, Nansei-shoto, Philippines, Sri Lanka, Taiwan, Thailand, Vietnam	Sp. Pl.: 1095 (1753)	0	L.	0	Linné, Carl von;Linnaeus, Carl
Adiantum pedatum		1753	1753	L.	Alabama, Alaska, Amur, Arkansas, Assam, China North-Central, China South-Central, China Southeast, Connecticut, Delaware, District of Columbia, East Himalaya, Georgia, Illinois, Indiana, Iowa, Japan, Kansas, Kentucky, Khabarovsk, Korea, Kuril Is., Louisiana, Maine, Manchuria, Maryland, Masachusettes, Michigan, Minnesota, Mississippi, Missouri, Myanmar, Nebraska, Nepal, New Brunswick, New Hampshir…	Sp. Pl.: 1095 (1753)	0	L.	0	Linné, Carl von;Linnaeus, Carl
Adiantum philippense		1753	1753	L.	Andaman Is., Angola, Assam, Bangladesh, Benin, Burkina, Burundi, Cambodia, Cameroon, Cape Verde, Caroline Is., Central African Repu, Chad, China South-Central, China Southeast, Comoros, East Himalaya, Ethiopia, Fiji, Ghana, Guinea, Guinea-Bissau, Gulf of Guinea Is., Hainan, India, Ivory Coast, Laos, Lesser Sunda Is., Liberia, Madagascar, Malawi, Malaya, Mali, Maluku, Marianas, Mauritius, Mozambiq…	Sp. Pl.: 1094 (1753)	0	L.	0	Linné, Carl von;Linnaeus, Carl
Adonis apennina		1753	1753	L.	Altay, Amur, Buryatiya, Chita, East European Russia, Inner Mongolia, Irkutsk, Kazakhstan, Krasnoyarsk, Mongolia, North European Russi, Tuva, West Siberia, Xinjiang, Yakutskiya	Sp. Pl.: 548 (1753)	0	L.	0	Linné, Carl von;Linnaeus, Carl
Adoxa moschatellina		1753	1753	L.	Albania, Altay, Amur, Austria, Baltic States, Belarus, Belgium, Bulgaria, Buryatiya, Central European Rus, China North-Central, China South-Central, Chita, Colorado, Corse, Czechoslovakia, Denmark, East European Russia, Finland, France, Germany, Great Britain, Greece, Hungary, Illinois, Inner Mongolia, Ireland, Irkutsk, Italy, Japan, Kamchatka, Kazakhstan, Khabarovsk, Kirgizstan, Korea, Krasnoyar…	Sp. Pl.: 367 (1753)	0	L.	0	Linné, Carl von;Linnaeus, Carl
Aeginetia indica		1753	1753	L.	Assam, Bangladesh, Borneo, Cambodia, China South-Central, China Southeast, East Himalaya, India, Japan, Jawa, Korea, Laos, Malaya, Myanmar, Nansei-shoto, Nepal, New Guinea, Ogasawara-shoto, Philippines, Sri Lanka, Taiwan, Thailand, Vietnam	Sp. Pl.: 632 (1753)	0	L.	0	Linné, Carl von;Linnaeus, Carl
Aeschynomene indica		1753	1753	L.	Afghanistan, Andaman Is., Angola, Assam, Bangladesh, Benin, Borneo, Botswana, Burkina, Burundi, Cambodia, Cameroon, Central African Repu, Chad, China North-Central, China South-Central, China Southeast, Comoros, East Himalaya, Eritrea, Ethiopia, Florida, Gabon, Gambia, Ghana, Guinea-Bissau, Gulf of Guinea Is., Hainan, India, Iran, Ivory Coast, Japan, Kenya, Korea, KwaZulu-Natal, Laos, Madagascar,…	Sp. Pl.: 713 (1753)	0	L.	0	Linné, Carl von;Linnaeus, Carl
Afrohybanthus enneaspermus	Viola enneasperma	1753	2015	(L.) Flicker	Andaman Is., Angola, Bangladesh, Benin, Burkina, Burundi, Cameroon, Central African Repu, China Southeast, Congo, Djibouti, Eritrea, Ethiopia, Gabon, Ghana, Guinea, Gulf of Guinea Is., Hainan, India, Ivory Coast, Kenya, Lesser Sunda Is., Liberia, Madagascar, Mali, Mauritania, Mozambique, New Guinea, New South Wales, Niger, Nigeria, Northern Territory, Queensland, Saudi Arabia, Senegal, Socotra, S…	Phytotaxa 230: 47 (2015)	0	L.	0	Linné, Carl von;Linnaeus, Carl
Aglaia pinnata	Vitex pinnata	1753	1913	(L.) Druce	China Southeast, Vietnam	Rep. Bot. Exch. Club Soc. Brit. Isles 3: 413 (1913 publ. 1914)	0	L.	0	Linné, Carl von;Linnaeus, Carl
Agropyron cristatum	Bromus cristatus	1753	1770	(L.) Gaertn.	Afghanistan, Albania, Altay, Amur, Austria, Bulgaria, Buryatiya, Central European Rus, China North-Central, Chita, Czechoslovakia, East European Russia, Egypt, Greece, Hungary, Inner Mongolia, Iran, Iraq, Irkutsk, Italy, Kamchatka, Kazakhstan, Khabarovsk, Kirgizstan, Korea, Krasnoyarsk, Krym, Magadan, Manchuria, Mongolia, Morocco, North Caucasus, Northwest European R, Primorye, Qinghai, Romania, …	Novi Comment. Acad. Sci. Imp. Petrop. 14(1): 540 (1770)	0	L.	0	Linné, Carl von;Linnaeus, Carl
Agrostis canina		1753	1753	L.	Afghanistan, Albania, Austria, Baltic States, Belarus, Belgium, Bulgaria, Central European Rus, China South-Central, Corse, Czechoslovakia, Denmark, East European Russia, Finland, France, Føroyar, Germany, Great Britain, Greece, Hungary, Iceland, Iran, Ireland, Italy, Kazakhstan, Kirgizstan, Korea, Mongolia, Netherlands, North European Russi, Northwest European R, Norway, Pakistan, Poland, Portug…	Sp. Pl.: 62 (1753)	0	L.	0	Linné, Carl von;Linnaeus, Carl
Agrostis capillaris		1753	1753	L.	Afghanistan, Albania, Altay, Austria, Baltic States, Belarus, Belgium, Bulgaria, Buryatiya, Central European Rus, China North-Central, China Southeast, Corse, Czechoslovakia, Denmark, East European Russia, Finland, France, Føroyar, Germany, Great Britain, Greece, Hungary, Iceland, Inner Mongolia, Iran, Ireland, Irkutsk, Italy, Kazakhstan, Krasnoyarsk, Krym, Netherlands, North Caucasus, North Euro…	Sp. Pl.: 62 (1753)	0	L.	0	Linné, Carl von;Linnaeus, Carl
Agrostis stolonifera		1753	1753	L.	Afghanistan, Albania, Algeria, Altay, Austria, Baleares, Baltic States, Belarus, Belgium, Bulgaria, Buryatiya, Central European Rus, Chad, China North-Central, China South-Central, China Southeast, Chita, Corse, Cyprus, Czechoslovakia, Denmark, East Aegean Is., East European Russia, East Himalaya, Finland, France, Føroyar, Germany, Great Britain, Greece, Hungary, Iceland, India, Inner Mongolia, I…	Sp. Pl.: 62 (1753)	0	L.	0	Linné, Carl von;Linnaeus, Carl
Aira caryophyllea		1753	1753	L.	Albania, Algeria, Austria, Azores, Baltic States, Belarus, Belgium, Bulgaria, Cameroon, Canary Is., Cape Verde, Corse, Czechoslovakia, Denmark, East Aegean Is., Ethiopia, France, Germany, Great Britain, Gulf of Guinea Is., Hungary, Ireland, Italy, Kenya, Krym, Madagascar, Madeira, Malawi, Morocco, Netherlands, Nigeria, Poland, Portugal, Romania, Rwanda, Sardegna, Sicilia, Spain, Sudan, Sweden, Sw…	Sp. Pl.: 66 (1753)	0	L.	0	Linné, Carl von;Linnaeus, Carl
Aldrovanda vesiculosa		1753	1753	L.	Amur, Assam, Bangladesh, Belarus, Botswana, Burundi, Cameroon, Central European Rus, Chad, Czechoslovakia, France, Germany, Ghana, Hungary, India, Inner Mongolia, Japan, Kazakhstan, Khabarovsk, Lesser Sunda Is., Madagascar, Manchuria, New South Wales, North Caucasus, Northern Territory, Northwest European R, Poland, Primorye, Queensland, Romania, Rwanda, South European Russi, Sudan, Tanzania, Tra…	Sp. Pl.: 281 (1753)	0	L.	0	Linné, Carl von;Linnaeus, Carl
Aleurites moluccanus	Jatropha moluccana	1753	1805	(L.) Willd.	Assam, Bangladesh, Borneo, Cambodia, China South-Central, China Southeast, Hainan, India, Jawa, Lesser Sunda Is., Malaya, Myanmar, New Guinea, Philippines, Queensland, Sri Lanka, Sulawesi, Taiwan, Thailand, Vietnam	Sp. Pl., ed. 4, 4: 590 (1805)	0	L.	0	Linné, Carl von;Linnaeus, Carl
Alisma plantago-aquatica		1753	1753	L.	Afghanistan, Albania, Algeria, Altay, Amur, Assam, Austria, Baleares, Baltic States, Bangladesh, Belarus, Belgium, Bulgaria, Burundi, Buryatiya, Central European Rus, China North-Central, China South-Central, China Southeast, Chita, Corse, Czechoslovakia, Denmark, East Aegean Is., East European Russia, East Himalaya, Egypt, Eritrea, Ethiopia, Finland, France, Germany, Great Britain, Greece, Hunga…	Sp. Pl.: 342 (1753)	0	L.	0	Linné, Carl von;Linnaeus, Carl
Allium fistulosum		1753	1753	L.	China North-Central, China South-Central	Sp. Pl.: 301 (1753)	1	L.	0	Linné, Carl von;Linnaeus, Carl
Allium lineare		1753	1753	L.	Altay, Austria, Central European Rus, Czechoslovakia, East European Russia, France, Germany, Italy, Kazakhstan, Mongolia, Poland, South European Russi, Switzerland, Ukraine, West Siberia, Xinjiang	Sp. Pl. 1: 295 (1753)	0	L.	0	Linné, Carl von;Linnaeus, Carl
Allium nutans		1753	1753	L.	Altay, Amur, East European Russia, Kazakhstan, Krasnoyarsk, Mongolia, Tuva, West Siberia, Xinjiang	Sp. Pl.: 299 (1753)	0	L.	0	Linné, Carl von;Linnaeus, Carl
Allium obliquum		1753	1753	L.	Altay, East European Russia, Kazakhstan, Kirgizstan, Krasnoyarsk, Mongolia, Romania, South European Russi, West Siberia, Xinjiang	Sp. Pl.: 296 (1753)	0	L.	0	Linné, Carl von;Linnaeus, Carl
Allium ramosum		1753	1753	L.	Altay, Amur, Buryatiya, China North-Central, Chita, Inner Mongolia, Irkutsk, Kazakhstan, Khabarovsk, Krasnoyarsk, Magadan, Manchuria, Mongolia, Primorye, Qinghai, Sakhalin, Tuva, West Siberia, Xinjiang	Sp. Pl.: 296 (1753)	0	L.	0	Linné, Carl von;Linnaeus, Carl
Allium schoenoprasum		1753	1753	L.	Afghanistan, Alaska, Albania, Alberta, Altay, Austria, Baltic States, Belarus, British Columbia, Bulgaria, Buryatiya, Central European Rus, Chita, Colorado, Connecticut, Corse, Czechoslovakia, Denmark, East European Russia, Finland, France, Germany, Great Britain, Greece, Idaho, Iran, Iraq, Irkutsk, Italy, Japan, Kamchatka, Kazakhstan, Khabarovsk, Korea, Krasnoyarsk, Kuril Is., Labrador, Magadan,…	Sp. Pl.: 301 (1753)	0	L.	0	Linné, Carl von;Linnaeus, Carl
Allium senescens		1753	1753	L.	Altay, Amur, Buryatiya, Chita, Inner Mongolia, Irkutsk, Kazakhstan, Khabarovsk, Korea, Krasnoyarsk, Manchuria, Mongolia, Primorye, Tuva, Xinjiang	Sp. Pl.: 299 (1753)	0	L.	0	Linné, Carl von;Linnaeus, Carl
Allium tenuissimum		1753	1753	L.	Buryatiya, China North-Central, China South-Central, China Southeast, Chita, Inner Mongolia, Irkutsk, Kazakhstan, Korea, Manchuria, Mongolia, Xinjiang, Yakutskiya	Sp. Pl.: 301 (1753)	0	L.	0	Linné, Carl von;Linnaeus, Carl
Allmania nodiflora	Celosia nodiflora	1753	1834	(L.) R.Br. ex Wight	Borneo, China Southeast, East Himalaya, Hainan, India, Jawa, Laos, Lesser Sunda Is., Malaya, Philippines, Sri Lanka, Sumatera, Thailand, Vietnam	J. Bot. (Hooker) 1: 226 (1834)	0	L.	0	Linné, Carl von;Linnaeus, Carl
Alopecurus pratensis		1753	1753	L.	Afghanistan, Albania, Altay, Austria, Azores, Baltic States, Belarus, Belgium, Bulgaria, Buryatiya, Central European Rus, Chita, Corse, Czechoslovakia, Denmark, East European Russia, Finland, France, Germany, Great Britain, Greece, Hungary, Inner Mongolia, Iran, Ireland, Irkutsk, Italy, Kazakhstan, Kirgizstan, Krasnoyarsk, Krym, Manchuria, Mongolia, Netherlands, North Caucasus, North European Rus…	Sp. Pl.: 60 (1753)	0	L.	0	Linné, Carl von;Linnaeus, Carl
Alternanthera sessilis	Gomphrena sessilis	1753	1813	(L.) R.Br. ex DC.	Andaman Is., Assam, Bangladesh, Belize, Bolivia, Borneo, Brazil North, Brazil Northeast, Brazil South, Brazil Southeast, Brazil West-Central, Cambodia, Cayman Is., China South-Central, China Southeast, Colombia, Cuba, Dominican Republic, East Himalaya, El Salvador, French Guiana, Guatemala, Guyana, Haiti, Honduras, India, Iran, Iraq, Jamaica, Jawa, Laccadive Is., Laos, Lebanon-Syria, Leeward Is.,…	Cat. Pl. Horti Monsp.: 77 (1813)	0	L.	0	Linné, Carl von;Linnaeus, Carl
Althaea officinalis		1753	1753	L.	Afghanistan, Albania, Algeria, Altay, Austria, Belarus, Belgium, Bulgaria, Central European Rus, Corse, Czechoslovakia, Denmark, France, Germany, Great Britain, Greece, Hungary, Iran, Iraq, Italy, Kazakhstan, Kirgizstan, Krasnoyarsk, Krym, Lebanon-Syria, Netherlands, Pakistan, Palestine, Poland, Portugal, Romania, Sardegna, Sicilia, South European Russi, Spain, Tadzhikistan, Transcaucasus, Tunisi…	Sp. Pl.: 686 (1753)	0	L.	0	Linné, Carl von;Linnaeus, Carl
Alysicarpus bupleurifolius	Hedysarum bupleurifolium	1753	1825	(L.) DC.	Assam, Bangladesh, China South-Central, China Southeast, East Himalaya, India, Jawa, Lesser Sunda Is., Myanmar, Nepal, New Guinea, Pakistan, Philippines, Sri Lanka, Sulawesi, Taiwan, Thailand, Vietnam, West Himalaya	Prodr. 2: 352 (1825)	0	L.	0	Linné, Carl von;Linnaeus, Carl
Alysicarpus vaginalis	Hedysarum vaginale	1753	1825	(L.) DC.	Angola, Assam, Bangladesh, Benin, Bismarck Archipelago, Borneo, Cambodia, Cameroon, Central African Repu, Chad, China South-Central, China Southeast, Comoros, Congo, East Himalaya, Equatorial Guinea, Gabon, Ghana, Gulf of Guinea Is., Gulf States, Hainan, India, Jawa, Kenya, KwaZulu-Natal, Laccadive Is., Laos, Lesser Sunda Is., Madagascar, Malaya, Maldives, Mauritania, Mauritius, Mozambique, Myanm…	Prodr. 2: 353 (1825)	0	L.	0	Linné, Carl von;Linnaeus, Carl
Amethystea caerulea		1753	1753	L.	Altay, Amur, Buryatiya, China North-Central, China South-Central, China Southeast, Chita, Inner Mongolia, Irkutsk, Japan, Kazakhstan, Khabarovsk, Kirgizstan, Korea, Krasnoyarsk, Manchuria, Mongolia, Primorye, Sakhalin, Tadzhikistan, Tibet, Tuva, Xinjiang, Yakutskiya	Sp. Pl.: 21 (1753)	0	L.	0	Linné, Carl von;Linnaeus, Carl
Ammannia baccifera		1753	1753	L.	Afghanistan, Angola, Bangladesh, Benin, Botswana, Burkina, Burundi, Cambodia, Cameroon, Cape Provinces, Central African Repu, Chad, China North-Central, China South-Central, China Southeast, Djibouti, East Himalaya, Egypt, Eritrea, Ethiopia, Free State, Ghana, India, Iran, Iraq, Ivory Coast, Jawa, Kenya, Laccadive Is., Laos, Lesser Sunda Is., Madagascar, Malawi, Malaya, Mali, Mauritania, Mauritiu…	Sp. Pl.: 120 (1753)	0	L.	0	Linné, Carl von;Linnaeus, Carl
Anabasis aphylla		1753	1753	L.	China North-Central, Iran, Kazakhstan, Kirgizstan, South European Russi, Tadzhikistan, Turkmenistan, Uzbekistan, Xinjiang	Sp. Pl.: 223 (1753)	0	L.	0	Linné, Carl von;Linnaeus, Carl
Anaphalis margaritacea	Gnaphalium margaritaceum	1753	1873	(L.) Benth. & Hook.f.	Assam, China North-Central, China South-Central, China Southeast, East Himalaya, India, Japan, Kamchatka, Khabarovsk, Kuril Is., Nepal, Pakistan, Primorye, Qinghai, Sakhalin, Sri Lanka, Taiwan, Thailand, Tibet, Vietnam, West Himalaya	Gen. Pl. 2(1): 303 (1873)	0	L.	0	Linné, Carl von;Linnaeus, Carl
Androsace gmelinii	Cortusa gmelinii	1753	1819	(L.) Roem. & Schult.	Altay, Buryatiya, China South-Central, Chita, Inner Mongolia, Irkutsk, Kazakhstan, Krasnoyarsk, Mongolia, Tibet, Tuva, Yakutskiya	Syst. Veg., ed. 15 bis 4: 165 (1819)	0	L.	0	Linné, Carl von;Linnaeus, Carl
Androsace maxima		1753	1753	L.	Afghanistan, Algeria, Altay, Austria, Bulgaria, Buryatiya, Central European Rus, China North-Central, Chita, Cyprus, Czechoslovakia, East European Russia, France, Germany, Greece, Hungary, Inner Mongolia, Iran, Iraq, Irkutsk, Italy, Kazakhstan, Kirgizstan, Krasnoyarsk, Krym, Lebanon-Syria, Libya, Mongolia, Morocco, Palestine, Romania, Saudi Arabia, South European Russi, Spain, Switzerland, Tadzhi…	Sp. Pl.: 141 (1753)	0	L.	0	Linné, Carl von;Linnaeus, Carl
Androsace septentrionalis		1753	1753	L.	Alaska, Alberta, Altay, Amur, Arizona, Austria, Baltic States, Belarus, British Columbia, California, Central European Rus, China North-Central, Colorado, Czechoslovakia, Denmark, East European Russia, Finland, France, Germany, Greenland, Idaho, Inner Mongolia, Italy, Kamchatka, Kazakhstan, Khabarovsk, Kirgizstan, Korea, Magadan, Manitoba, Mexico Northeast, Mexico Northwest, Minnesota, Mongolia, …	Sp. Pl.: 142 (1753)	0	L.	0	Linné, Carl von;Linnaeus, Carl
Anemonoides sylvestris	Anemone sylvestris	1753	2005	(L.) Galasso, Banfi & Soldano	Altay, Amur, Austria, Baltic States, Belarus, Bulgaria, Buryatiya, Central European Rus, China North-Central, Chita, Czechoslovakia, East European Russia, France, Germany, Hungary, Inner Mongolia, Irkutsk, Italy, Kazakhstan, Krasnoyarsk, Manchuria, Mongolia, North European Russi, Northwest European R, Poland, Romania, South European Russi, Sweden, Switzerland, Tibet, Transcaucasus, Tuva, Ukraine,…	Atti Soc. Ital. Sci. Nat. Mus. Civico Storia Nat. Milano 146: 222 (2005)	0	L.	0	Linné, Carl von;Linnaeus, Carl
Angelica sylvestris		1753	1753	L.	Albania, Altay, Austria, Baltic States, Belarus, Belgium, Bulgaria, Buryatiya, Central European Rus, Corse, Czechoslovakia, Denmark, East European Russia, Finland, France, Føroyar, Germany, Great Britain, Greece, Hungary, Iceland, Ireland, Irkutsk, Italy, Kazakhstan, Krasnoyarsk, Lebanon-Syria, Mongolia, Netherlands, North European Russi, Northwest European R, Norway, Poland, Portugal, Romania, S…	Sp. Pl.: 251 (1753)	0	L.	0	Linné, Carl von;Linnaeus, Carl
Anisomeles indica	Nepeta indica	1753	1891	(L.) Kuntze	Andaman Is., Assam, Bangladesh, Bismarck Archipelago, Borneo, Cambodia, China South-Central, China Southeast, Christmas I., East Himalaya, India, Jawa, Laccadive Is., Laos, Lesser Sunda Is., Malaya, Maldives, Maluku, Myanmar, Nansei-shoto, Nepal, New Guinea, Nicobar Is., Pakistan, Philippines, Sri Lanka, Sulawesi, Sumatera, Taiwan, Thailand, Tibet, Vietnam, West Himalaya	Revis. Gen. Pl. 2: 512 (1891)	0	L.	0	Linné, Carl von;Linnaeus, Carl
Anogramma leptophylla	Polypodium leptophyllum	1753	1841	(L.) Link	Afghanistan, Algeria, Angola, Azores, Baleares, Brazil South, Cameroon, Canary Is., Cape Provinces, Cape Verde, China South-Central, Corse, Costa Rica, Cyprus, Djibouti, Ecuador, Egypt, El Salvador, Ethiopia, France, Free State, Greece, Guatemala, Gulf of Guinea Is., India, Iran, Iraq, Italy, Jawa, Kenya, Kriti, Krym, KwaZulu-Natal, Lebanon-Syria, Lesotho, Lesser Sunda Is., Libya, Madagascar, Mad…	Fil. Spec.: 137 (1841)	0	L.	0	Linné, Carl von;Linnaeus, Carl
Antennaria dioica	Gnaphalium dioicum	1753	1791	(L.) Gaertn.	Albania, Aleutian Is., Altay, Amur, Austria, Baltic States, Belarus, Belgium, Bulgaria, Buryatiya, Central European Rus, China North-Central, Chita, Czechoslovakia, Denmark, East European Russia, Finland, France, Germany, Great Britain, Greece, Hungary, Ireland, Irkutsk, Italy, Japan, Kamchatka, Kazakhstan, Khabarovsk, Korea, Krasnoyarsk, Krym, Kuril Is., Magadan, Manchuria, Mongolia, Netherlands…	Fruct. Sem. Pl. 2: 410 (1791)	0	L.	0	Linné, Carl von;Linnaeus, Carl
Anthriscus sylvestris	Chaerophyllum sylvestre	1753	1814	(L.) Hoffm.	Albania, Altay, Amur, Austria, Baltic States, Belarus, Belgium, Bulgaria, Buryatiya, Central European Rus, China North-Central, China South-Central, China Southeast, Czechoslovakia, Denmark, East European Russia, Ethiopia, Finland, France, Germany, Great Britain, Greece, Hungary, Inner Mongolia, Iran, Ireland, Irkutsk, Italy, Kamchatka, Kazakhstan, Kenya, Khabarovsk, Kirgizstan, Korea, Krasnoyars…	Gen. Pl. Umbell.: 40 (1814)	0	L.	0	Linné, Carl von;Linnaeus, Carl
Anticlea sibirica	Melanthium sibiricum	1753	1843	(L.) Kunth	Altay, Amur, Buryatiya, China North-Central, China South-Central, Chita, East European Russia, Inner Mongolia, Irkutsk, Japan, Khabarovsk, Korea, Krasnoyarsk, Magadan, Manchuria, Mongolia, Primorye, Tuva, West Siberia, Yakutskiya	Enum. Pl. 4: 191 (1843)	0	L.	0	Linné, Carl von;Linnaeus, Carl
Apluda mutica		1753	1753	L.	Afghanistan, Andaman Is., Assam, Bangladesh, Borneo, Cambodia, Caroline Is., China South-Central, China Southeast, Cocos (Keeling) Is., East Himalaya, Hainan, India, Japan, Jawa, Kazakhstan, Kirgizstan, Laccadive Is., Laos, Lesser Sunda Is., Malaya, Maldives, Maluku, Mauritius, Myanmar, Nansei-shoto, Nepal, New Caledonia, New Guinea, Nicobar Is., Oman, Pakistan, Philippines, Réunion, Socotra, Sol…	Sp. Pl.: 82 (1753)	0	L.	0	Linné, Carl von;Linnaeus, Carl
Apocynum venetum		1753	1753	L.	Afghanistan, Altay, Bulgaria, Buryatiya, Central European Rus, China North-Central, China Southeast, Cyprus, Inner Mongolia, Iran, Iraq, Italy, Japan, Kazakhstan, Kirgizstan, Korea, Krasnoyarsk, Krym, Manchuria, Mongolia, North Caucasus, Pakistan, Palestine, Qinghai, South European Russi, Tadzhikistan, Tibet, Transcaucasus, Turkey, Turkey-in-Europe, Turkmenistan, Ukraine, Uzbekistan, West Siberia…	Sp. Pl.: 213 (1753)	0	L.	0	Linné, Carl von;Linnaeus, Carl
Arabidopsis thaliana	Arabis thaliana	1753	1842	(L.) Heynh.	Afghanistan, Albania, Algeria, Altay, Austria, Azores, Baleares, Baltic States, Belarus, Belgium, Bulgaria, Canary Is., Cape Verde, Central European Rus, China North-Central, China South-Central, China Southeast, Corse, Cyprus, Czechoslovakia, Denmark, Djibouti, East Aegean Is., East European Russia, Eritrea, Ethiopia, Finland, France, Germany, Great Britain, Greece, Hungary, Iran, Ireland, Italy…	F.Holl &amp; H.Heynhold, Fl. Sachsen: 538 (1842)	0	L.	0	Linné, Carl von;Linnaeus, Carl
Arabis hirsuta	Turritis hirsuta	1753	1771	(L.) Scop.	Albania, Algeria, Amur, Austria, Baltic States, Baltic States, Belgium, Bulgaria, Central European Rus, China North-Central, China South-Central, China Southeast, Corse, Czechoslovakia, Denmark, East European Russia, Finland, France, Germany, Great Britain, Greece, Hungary, Inner Mongolia, Iran, Iraq, Ireland, Italy, Japan, Kamchatka, Kazakhstan, Khabarovsk, Korea, Krym, Kuril Is., Magadan, Manch…	Fl. Carniol., ed. 2, 2: 30 (1771)	0	L.	0	Linné, Carl von;Linnaeus, Carl
Aralia chinensis		1753	1753	L.	Borneo, China South-Central, China Southeast, Hainan, Vietnam	Sp. Pl.: 273 (1753)	0	L.	0	Linné, Carl von;Linnaeus, Carl
Arctium lappa		1753	1753	L.	Afghanistan, Albania, Altay, Austria, Baleares, Baltic States, Belarus, Belgium, Bulgaria, Cambodia, Central European Rus, China North-Central, China South-Central, China Southeast, Corse, Cyprus, Czechoslovakia, Denmark, East Aegean Is., East European Russia, East Himalaya, Finland, France, Føroyar, Germany, Great Britain, Greece, Greenland, Hainan, Hungary, Iceland, Inner Mongolia, Iran, Iraq, …	Sp. Pl.: 816 (1753)	0	L.	0	Linné, Carl von;Linnaeus, Carl
Arctogeron gramineum	Erigeron gramineus	1753	1836	(L.) DC.	Buryatiya, Chita, Inner Mongolia, Kazakhstan, Krasnoyarsk, Manchuria, Mongolia, Tuva	Prodr. 5: 261 (1836)	0	L.	0	Linné, Carl von;Linnaeus, Carl
Arctous alpina	Arbutus alpina	1753	1889	(L.) Nied.	Alaska, Albania, Alberta, Aleutian Is., Altay, Amur, Austria, British Columbia, Buryatiya, China North-Central, China South-Central, Chita, Czechoslovakia, East European Russia, Finland, France, Germany, Great Britain, Greenland, Inner Mongolia, Irkutsk, Italy, Japan, Kamchatka, Kazakhstan, Khabarovsk, Kirgizstan, Krasnoyarsk, Kuril Is., Labrador, Magadan, Maine, Manitoba, Mongolia, New Hampshire…	H.G.A.Engler &amp; K.A.E.Prantl, Nat. Pflanzenfam. 4(1): 48 (1889)	0	L.	0	Linné, Carl von;Linnaeus, Carl
Arenaria serpyllifolia		1753	1753	L.	Afghanistan, Albania, Algeria, Altay, Austria, Baltic States, Belarus, Belgium, Bulgaria, Central European Rus, China North-Central, China South-Central, China Southeast, Corse, Czechoslovakia, Denmark, Djibouti, East Aegean Is., East European Russia, Egypt, Ethiopia, Finland, France, Germany, Great Britain, Greece, Gulf States, Hungary, India, Inner Mongolia, Iran, Iraq, Ireland, Italy, Japan, K…	Sp. Pl.: 423 (1753)	0	L.	0	Linné, Carl von;Linnaeus, Carl
Argentina anserina	Potentilla anserina	1753	1898	(L.) Rydb.	Afghanistan, Alaska, Alberta, Altay, Amur, Arizona, Austria, Baltic States, Belarus, Belgium, British Columbia, Bulgaria, Buryatiya, California, Central European Rus, China North-Central, China South-Central, Chita, Colorado, Connecticut, Czechoslovakia, Denmark, East European Russia, East Himalaya, Finland, France, Føroyar, Germany, Great Britain, Greenland, Hungary, Iceland, Idaho, Illinois, In…	Monogr. N. Amer. Potent. 2: 159 (1898)	0	L.	0	Linné, Carl von;Linnaeus, Carl
Aristida adscensionis		1753	1753	L.	Afghanistan, Algeria, Andaman Is., Angola, Argentina Northeast, Argentina Northwest, Arizona, Aruba, Ascension, Bahamas, Bangladesh, Benin, Bolivia, Botswana, Brazil North, Brazil Northeast, Brazil Southeast, Brazil West-Central, Burkina, Burundi, California, Cameroon, Canary Is., Cape Provinces, Cape Verde, Chad, Chile Central, Chile North, China North-Central, China South-Central, Colombia, Col…	Sp. Pl.: 82 (1753)	0	L.	0	Linné, Carl von;Linnaeus, Carl
Artemisia absinthium		1753	1753	L.	Afghanistan, Albania, Algeria, Altay, Austria, Baltic States, Belarus, Belgium, Bulgaria, Buryatiya, Central European Rus, China Southeast, Czechoslovakia, Denmark, East European Russia, Egypt, France, Germany, Great Britain, Greece, Hungary, Iceland, Iran, Iraq, Irkutsk, Italy, Kazakhstan, Kirgizstan, Krasnoyarsk, Kriti, Krym, Lebanon-Syria, Libya, Morocco, Netherlands, North Caucasus, North Eur…	Sp. Pl.: 848 (1753)	0	L.	0	Linné, Carl von;Linnaeus, Carl
Artemisia annua		1753	1753	L.	Afghanistan, Algeria, Altay, Amur, Borneo, Bulgaria, Buryatiya, Central European Rus, China North-Central, China South-Central, China Southeast, Chita, Cyprus, East European Russia, East Himalaya, Egypt, Greece, Hainan, India, Inner Mongolia, Iran, Iraq, Irkutsk, Japan, Jawa, Kazakhstan, Khabarovsk, Kirgizstan, Korea, Krasnoyarsk, Krym, Lebanon-Syria, Lesser Sunda Is., Libya, Malaya, Maluku, Manc…	Sp. Pl.: 847 (1753)	0	L.	0	Linné, Carl von;Linnaeus, Carl
Artemisia campestris		1753	1753	L.	Albania, Algeria, Austria, Baltic States, Belarus, Belgium, Bulgaria, Central European Rus, China North-Central, Czechoslovakia, Denmark, East European Russia, Finland, France, Germany, Great Britain, Greece, Hungary, Iran, Iraq, Italy, Krym, Netherlands, North Caucasus, North European Russi, Northwest European R, Poland, Romania, Sicilia, Spain, Sweden, Transcaucasus, Turkey, Turkey-in-Europe, U…	Sp. Pl.: 846 (1753)	0	L.	0	Linné, Carl von;Linnaeus, Carl
Artemisia dracunculus		1753	1753	L.	Afghanistan, Alberta, Altay, Amur, Arizona, Baltic States, Belarus, Borneo, British Columbia, Buryatiya, California, Central European Rus, China North-Central, China South-Central, China Southeast, Chita, Colorado, East European Russia, East Himalaya, Hainan, Idaho, Illinois, India, Inner Mongolia, Iowa, Irkutsk, Japan, Jawa, Kansas, Kazakhstan, Khabarovsk, Kirgizstan, Krasnoyarsk, Krym, Magadan,…	Sp. Pl.: 849 (1753)	0	L.	0	Linné, Carl von;Linnaeus, Carl
Artemisia integrifolia		1753	1753	L.	Amur, Buryatiya, China North-Central, Chita, Inner Mongolia, Irkutsk, Khabarovsk, Korea, Krasnoyarsk, Manchuria, Mongolia, Primorye, Sakhalin, Tuva, West Siberia, Yakutskiya	Sp. Pl.: 848 (1753)	0	L.	0	Linné, Carl von;Linnaeus, Carl
Artemisia palustris		1753	1753	L.	Altay, Amur, Buryatiya, China North-Central, Chita, Inner Mongolia, Irkutsk, Korea, Krasnoyarsk, Manchuria, Mongolia, Tuva, Vietnam	Sp. Pl.: 846 (1753)	0	L.	0	Linné, Carl von;Linnaeus, Carl
Artemisia pontica		1753	1753	L.	Altay, Austria, Baltic States, Bulgaria, Central European Rus, China North-Central, Czechoslovakia, East European Russia, Hungary, Inner Mongolia, Italy, Kazakhstan, Krasnoyarsk, Krym, North Caucasus, Northwest European R, Romania, South European Russi, Spain, Ukraine, West Siberia, Xinjiang, Yugoslavia	Sp. Pl.: 847 (1753)	0	L.	0	Linné, Carl von;Linnaeus, Carl
Artemisia rupestris		1753	1753	L.	Afghanistan, Altay, Baltic States, Buryatiya, Chita, East European Russia, Germany, Irkutsk, Kazakhstan, Kirgizstan, Krasnoyarsk, Mongolia, North European Russi, Sweden, Tadzhikistan, Tuva, Uzbekistan, West Siberia, Xinjiang, Yakutskiya	Sp. Pl.: 847 (1753)	0	L.	0	Linné, Carl von;Linnaeus, Carl
Artemisia tanacetifolia		1753	1753	L.	Altay, Amur, Buryatiya, China North-Central, Chita, East European Russia, Inner Mongolia, Irkutsk, Khabarovsk, Korea, Krasnoyarsk, Magadan, Manchuria, Mongolia, North European Russi, Northwest European R, Primorye, Tuva, West Siberia, Yakutskiya	Sp. Pl.: 848 (1753)	0	L.	0	Linné, Carl von;Linnaeus, Carl
Artemisia vulgaris		1753	1753	L.	Afghanistan, Albania, Algeria, Altay, Amur, Austria, Baltic States, Belarus, Belgium, Bulgaria, Buryatiya, Central European Rus, China North-Central, China South-Central, Chita, Corse, Czechoslovakia, Denmark, East Aegean Is., East European Russia, Finland, France, Germany, Great Britain, Greece, Hungary, India, Iran, Iraq, Ireland, Irkutsk, Italy, Japan, Kamchatka, Kazakhstan, Khabarovsk, Kirgiz…	Sp. Pl.: 848 (1753)	0	L.	0	Linné, Carl von;Linnaeus, Carl
Arundo donax		1753	1753	L.	Afghanistan, Assam, Bangladesh, Cambodia, China South-Central, China Southeast, Cyprus, East Himalaya, Gulf States, Hainan, India, Iran, Iraq, Japan, Kazakhstan, Laos, Lebanon-Syria, Myanmar, Nansei-shoto, Nepal, Ogasawara-shoto, Oman, Pakistan, Palestine, Sinai, Tadzhikistan, Thailand, Tibet, Transcaucasus, Turkey, Turkmenistan, Uzbekistan, Vietnam, West Himalaya, Yemen	Sp. Pl.: 81 (1753)	0	L.	0	Linné, Carl von;Linnaeus, Carl
Asparagus officinalis		1753	1753	L.	Afghanistan, Albania, Altay, Austria, Belarus, Bulgaria, Central European Rus, Corse, Czechoslovakia, France, Germany, Greece, Hungary, Iran, Kazakhstan, Krasnoyarsk, Krym, Lebanon-Syria, Mongolia, North Caucasus, Pakistan, Poland, Sicilia, South European Russi, Switzerland, Transcaucasus, Turkey, Turkey-in-Europe, Ukraine, West Siberia, Xinjiang	Sp. Pl.: 313 (1753)	0	L.	0	Linné, Carl von;Linnaeus, Carl
Asperugo procumbens		1753	1753	L.	Afghanistan, Albania, Algeria, Altay, Austria, Baltic States, Bulgaria, Buryatiya, China North-Central, China South-Central, Cyprus, Czechoslovakia, Denmark, East Aegean Is., East European Russia, Finland, France, Germany, Greece, Hungary, Inner Mongolia, Iran, Iraq, Irkutsk, Italy, Kazakhstan, Khabarovsk, Kirgizstan, Krasnoyarsk, Krym, Lebanon-Syria, Libya, Magadan, Mongolia, Morocco, Nepal, Nor…	Sp. Pl.: 138 (1753)	0	L.	0	Linné, Carl von;Linnaeus, Carl
Asplenium adiantum-nigrum		1753	1753	L.	Afghanistan, Albania, Algeria, Arizona, Austria, Azores, Belgium, Bulgaria, Cameroon, Canary Is., Cape Provinces, Cape Verde, Chad, China North-Central, China South-Central, Colorado, Corse, Cyprus, Czechoslovakia, Denmark, East Himalaya, France, Free State, Føroyar, Germany, Great Britain, Greece, Hawaii, Hungary, Iran, Ireland, Italy, Kenya, Krym, KwaZulu-Natal, Lebanon-Syria, Lesotho, Madeira,…	Sp. Pl.: 1081 (1753)	0	L.	0	Linné, Carl von;Linnaeus, Carl
Asplenium ceterach		1753	1753	L.	Afghanistan, Albania, Algeria, Austria, Baleares, Belgium, Bulgaria, Corse, Cyprus, Czechoslovakia, Djibouti, France, Germany, Great Britain, Greece, Hungary, Iran, Iraq, Ireland, Italy, Kazakhstan, Kriti, Krym, Lebanon-Syria, Libya, Morocco, Netherlands, North Caucasus, Pakistan, Palestine, Poland, Portugal, Romania, Sardegna, Saudi Arabia, Sicilia, Sinai, Spain, Sweden, Switzerland, Tadzhikista…	Sp. Pl.: 1080 (1753)	0	L.	0	Linné, Carl von;Linnaeus, Carl
Asplenium ruta-muraria		1753	1753	L.	Afghanistan, Albania, Algeria, Altay, Assam, Austria, Baleares, Baltic States, Belarus, Belgium, Bulgaria, Buryatiya, Central European Rus, China North-Central, China South-Central, China Southeast, Chita, Corse, Cyprus, Czechoslovakia, Denmark, East European Russia, Finland, France, Germany, Great Britain, Greece, Hungary, Inner Mongolia, Iran, Ireland, Irkutsk, Italy, Japan, Kazakhstan, Khabaro…	Sp. Pl.: 1081 (1753)	0	L.	0	Linné, Carl von;Linnaeus, Carl
Asplenium septentrionale	Acrostichum septentrionale	1753	1796	(L.) Hoffm.	Afghanistan, Albania, Altay, Arizona, Austria, Belarus, Belgium, Bulgaria, California, Canary Is., Central European Rus, China North-Central, Colorado, Corse, Czechoslovakia, Denmark, East European Russia, East Himalaya, Finland, France, Germany, Great Britain, Greece, Hungary, Iceland, Idaho, Iran, Italy, Japan, Kazakhstan, Kirgizstan, Krasnoyarsk, Krym, Madeira, Mexico Northwest, Mongolia, Moro…	Deutschl. Fl. 2: 12 (1796)	0	L.	0	Linné, Carl von;Linnaeus, Carl
Asplenium trichomanes		1753	1753	L.	Alabama, Alaska, Alberta, Altay, Arizona, Arkansas, Austria, Baleares, British Columbia, Bulgaria, California, Canary Is., Central European Rus, China North-Central, China South-Central, China Southeast, Colorado, Connecticut, Czechoslovakia, Delaware, District of Columbia, Finland, Florida, France, Georgia, Germany, Great Britain, Greece, Idaho, Illinois, India, Indiana, Iran, Ireland, Italy, Ja…	Sp. Pl.: 1080 (1753)	0	L.	0	Linné, Carl von;Linnaeus, Carl
Aster alpinus		1753	1753	L.	Albania, Altay, Austria, Bulgaria, Buryatiya, Central European Rus, Chita, Czechoslovakia, East European Russia, France, Germany, Hungary, Inner Mongolia, Iran, Irkutsk, Italy, Kazakhstan, Krasnoyarsk, Manchuria, North Caucasus, North European Russi, Norway, Poland, Romania, Spain, Sweden, Switzerland, Transcaucasus, Turkey, Tuva, Ukraine, West Siberia, Yakutskiya, Yugoslavia	Sp. Pl.: 872 (1753)	0	L.	0	Linné, Carl von;Linnaeus, Carl
Aster indicus		1753	1753	L.	Assam, China North-Central, China South-Central, China Southeast, East Himalaya, Inner Mongolia, Japan, Jawa, Korea, Laos, Myanmar, Nansei-shoto, Nepal, Ogasawara-shoto, Taiwan, Thailand, Vietnam	Sp. Pl.: 876 (1753)	0	L.	0	Linné, Carl von;Linnaeus, Carl
Astragalus alpinus		1753	1753	L.	Alberta, Aleutian Is., Austria, British Columbia, Buryatiya, Chita, Colorado, Czechoslovakia, Finland, France, Germany, Great Britain, Greenland, Idaho, Irkutsk, Italy, Kamchatka, Kazakhstan, Kirgizstan, Krasnoyarsk, Kuril Is., Labrador, Magadan, Manitoba, Minnesota, Mongolia, Montana, Nevada, New Mexico, North Caucasus, North European Russi, Northwest European R, Northwest Territorie, Norway, Nu…	Sp. Pl.: 760 (1753)	0	L.	0	Linné, Carl von;Linnaeus, Carl
Astragalus contortuplicatus		1753	1753	L.	Altay, Bulgaria, East European Russia, Hungary, Iran, Italy, Kazakhstan, Krym, Mongolia, North Caucasus, Pakistan, Romania, South European Russi, Tadzhikistan, Transcaucasus, Turkmenistan, Tuva, Ukraine, Uzbekistan, West Siberia, Xinjiang, Yugoslavia	Sp. Pl.: 758 (1753)	0	L.	0	Linné, Carl von;Linnaeus, Carl
Astragalus sulcatus		1753	1753	L.	Altay, Austria, Central European Rus, China North-Central, Czechoslovakia, East European Russia, Hungary, Inner Mongolia, Irkutsk, Kazakhstan, Krasnoyarsk, Krym, Mongolia, North European Russi, South European Russi, Ukraine, West Siberia, Xinjiang, Yugoslavia	Sp. Pl.: 756 (1753)	0	L.	0	Linné, Carl von;Linnaeus, Carl
Astragalus uliginosus		1753	1753	L.	Altay, Amur, Buryatiya, Chita, Inner Mongolia, Irkutsk, Kamchatka, Kazakhstan, Khabarovsk, Korea, Krasnoyarsk, Manchuria, Mongolia, Primorye, Tuva, West Siberia	Sp. Pl.: 757 (1753)	0	L.	0	Linné, Carl von;Linnaeus, Carl
Athyrium filix-femina	Polypodium filix-femina	1753	1799	(L.) Roth	Albania, Algeria, Altay, Austria, Azores, Baltic States, Belarus, Belgium, Bulgaria, Buryatiya, Canary Is., Central European Rus, Chita, Corse, Czechoslovakia, Denmark, East European Russia, Finland, France, Føroyar, Germany, Great Britain, Greece, Hungary, Iceland, Iran, Ireland, Irkutsk, Italy, Kamchatka, Khabarovsk, Krasnoyarsk, Kriti, Krym, Kuril Is., Lebanon-Syria, Madeira, Magadan, Mongolia…	Tent. Fl. Germ. 3(1.1): 65 (1799)	0	L.	0	Linné, Carl von;Linnaeus, Carl
Atraphaxis frutescens	Polygonum frutescens	1753	1872	(L.) K.Koch	Altay, Buryatiya, China North-Central, Inner Mongolia, Kazakhstan, Krasnoyarsk, Mongolia, Qinghai, South European Russi, Turkmenistan, Tuva, Uzbekistan, West Siberia, Xinjiang	Dendrologie 2(1): 360 (1872)	0	L.	0	Linné, Carl von;Linnaeus, Carl
Atraphaxis spinosa		1753	1753	L.	Afghanistan, Iran, Kazakhstan, Kirgizstan, Lebanon-Syria, Mongolia, Pakistan, South European Russi, Tadzhikistan, Transcaucasus, Turkey, Turkmenistan, Turkmenistan, Uzbekistan, West Siberia, Xinjiang	Sp. Pl.: 745 (1753)	0	L.	0	Linné, Carl von;Linnaeus, Carl
Atriplex patula		1753	1753	L.	Afghanistan, Alabama, Alaska, Albania, Alberta, Algeria, Altay, Austria, Azores, Baleares, Baltic States, Belarus, Belgium, British Columbia, Bulgaria, California, Central European Rus, Connecticut, Corse, Cyprus, Czechoslovakia, Delaware, Denmark, District of Columbia, East Aegean Is., East European Russia, Egypt, Finland, Florida, France, Føroyar, Georgia, Germany, Great Britain, Greece, Hungar…	Sp. Pl.: 1053 (1753)	0	L.	0	Linné, Carl von;Linnaeus, Carl
Atriplex tatarica		1753	1753	L.	Afghanistan, Albania, Algeria, Altay, Baleares, Bulgaria, Central European Rus, China North-Central, Corse, Cyprus, East Aegean Is., East European Russia, Egypt, France, Greece, Hungary, Iran, Iraq, Italy, Kazakhstan, Kirgizstan, Krym, Lebanon-Syria, Mongolia, Morocco, Pakistan, Palestine, Qinghai, Romania, Sardegna, Saudi Arabia, Sicilia, Sinai, South European Russi, Tadzhikistan, Tibet, Transca…	Sp. Pl.: 1053 (1753)	0	L.	0	Linné, Carl von;Linnaeus, Carl
Avena fatua		1753	1753	L.	Afghanistan, Albania, Algeria, Altay, Austria, Azores, Baleares, Baltic States, Bangladesh, Belarus, Belgium, Bulgaria, Canary Is., Cape Verde, Central European Rus, China North-Central, China South-Central, China Southeast, Corse, Czechoslovakia, Denmark, East European Russia, East Himalaya, Egypt, Finland, France, Germany, Great Britain, Greece, Gulf States, Hungary, India, Inner Mongolia, Iran…	Sp. Pl.: 80 (1753)	0	L.	0	Linné, Carl von;Linnaeus, Carl
Avenella flexuosa	Aira flexuosa	1753	1838	(L.) Drejer	Alabama, Albania, Algeria, Argentina Northeast, Argentina Northwest, Argentina South, Arkansas, Azores, Baltic States, Belarus, Belgium, Borneo, Bulgaria, Burundi, Central European Rus, Chile Central, Chile North, Chile South, Congo, Connecticut, Corse, Czechoslovakia, Delaware, Denmark, District of Columbia, East European Russia, Ethiopia, Falkland Is., Finland, Florida, France, Føroyar, Georgia…	Fl. Excurs. Hafn.: 32 (1838)	0	L.	0	Linné, Carl von;Linnaeus, Carl
Axyris amaranthoides		1753	1753	L.	Altay, Amur, Buryatiya, Central European Rus, China North-Central, Chita, East European Russia, Inner Mongolia, Irkutsk, Kamchatka, Kazakhstan, Khabarovsk, Kirgizstan, Korea, Krasnoyarsk, Magadan, Manchuria, Mongolia, Primorye, Qinghai, South European Russi, Tuva, West Siberia, Xinjiang, Yakutskiya	Sp. Pl.: 979 (1753)	0	L.	0	Linné, Carl von;Linnaeus, Carl
Axyris hybrida		1753	1753	L.	Altay, Amur, Buryatiya, China North-Central, Chita, Inner Mongolia, Irkutsk, Kirgizstan, Krasnoyarsk, Manchuria, Mongolia, Qinghai, Tadzhikistan, Tuva, West Siberia, Xinjiang, Yakutskiya	Sp. Pl.: 980 (1753)	0	L.	0	Linné, Carl von;Linnaeus, Carl
Axyris prostrata		1753	1753	L.	Altay, Buryatiya, China South-Central, East Himalaya, Irkutsk, Kirgizstan, Krasnoyarsk, Mongolia, Nepal, Pakistan, Qinghai, Tadzhikistan, Tibet, Tuva, West Himalaya, Xinjiang	Sp. Pl.: 980 (1753)	0	L.	0	Linné, Carl von;Linnaeus, Carl
Baeckea frutescens		1753	1753	L.	Borneo, Cambodia, China Southeast, Hainan, Jawa, Laos, Lesser Sunda Is., Malaya, Myanmar, New Guinea, New South Wales, Philippines, Queensland, Sulawesi, Sumatera, Thailand, Vietnam	Sp. Pl.: 358 (1753)	0	L.	0	Linné, Carl von;Linnaeus, Carl
Barleria cristata		1753	1753	L.	Andaman Is., Assam, Bangladesh, Cambodia, China South-Central, China Southeast, East Himalaya, Hainan, India, Jawa, Laos, Malaya, Myanmar, Nepal, New Guinea, Pakistan, Panamá, Philippines, Sri Lanka, Taiwan, Thailand, Vietnam, West Himalaya	Sp. Pl.: 636 (1753)	0	L.	0	Linné, Carl von;Linnaeus, Carl
Barleria prionitis		1753	1753	L.	Assam, Bangladesh, China South-Central, India, Jawa, Laccadive Is., Laos, Lesser Sunda Is., Malaya, Maldives, Myanmar, Nicobar Is., Pakistan, Philippines, Sri Lanka, Sulawesi, Thailand, Vietnam, West Himalaya	Sp. Pl.: 636 (1753)	0	L.	0	Linné, Carl von;Linnaeus, Carl
Barringtonia asiatica	Mammea asiatica	1753	1875	(L.) Kurz	Andaman Is., Bismarck Archipelago, Borneo, Cambodia, Caroline Is., Chagos Archipelago, Cocos (Keeling) Is., Comoros, Cook Is., Fiji, Gilbert Is., India, Jawa, Lesser Sunda Is., Madagascar, Malaya, Maldives, Maluku, Marianas, Marshall Is., Mauritius, Nauru, New Caledonia, New Guinea, Nicobar Is., Niue, Philippines, Queensland, Réunion, Samoa, Santa Cruz Is., Seychelles, Society Is., Solomon Is., S…	Prelim. Rep. Forest Pegu, App. A: lxv (1875)	0	L.	0	Linné, Carl von;Linnaeus, Carl
Barringtonia racemosa	Eugenia racemosa	1753	1826	(L.) Spreng.	Andaman Is., Bangladesh, Bismarck Archipelago, Borneo, Caroline Is., Christmas I., Comoros, Fiji, Hainan, India, Jawa, Kenya, KwaZulu-Natal, Laos, Madagascar, Malaya, Maluku, Marianas, Mozambique, Mozambique Channel I, Myanmar, Nansei-shoto, New Caledonia, New Guinea, Nicobar Is., Philippines, Queensland, Samoa, Santa Cruz Is., Seychelles, Solomon Is., Sri Lanka, Sulawesi, Sumatera, Taiwan, Tanza…	Syst. Veg. 3: 127 (1826)	0	L.	0	Linné, Carl von;Linnaeus, Carl
Bassia prostrata	Salsola prostrata	1753	1909	(L.) Beck	Afghanistan, Albania, Algeria, Altay, Austria, Bulgaria, Buryatiya, Central European Rus, China North-Central, Chita, Czechoslovakia, France, Greece, Hungary, Inner Mongolia, Iran, Iraq, Irkutsk, Italy, Kazakhstan, Kirgizstan, Krasnoyarsk, Krym, Manchuria, Morocco, Pakistan, South European Russi, Spain, Switzerland, Tadzhikistan, Tibet, Transcaucasus, Turkey, Turkmenistan, Tuva, Ukraine, Uzbekist…	H.G.L.Reichenbach, Icon. Fl. Germ. Helv. 24: 155 (1909)	0	L.	0	Linné, Carl von;Linnaeus, Carl
Bassia scoparia	Chenopodium scoparium	1753	1978	(L.) A.J.Scott	Altay, Amur, Buryatiya, China North-Central, China South-Central, China Southeast, Cyprus, Hainan, Inner Mongolia, Iran, Iraq, Japan, Kazakhstan, Khabarovsk, Kirgizstan, Korea, Krasnoyarsk, Lebanon-Syria, Manchuria, Mongolia, North European Russi, Northwest European R, Primorye, Qinghai, Sakhalin, South European Russi, Tadzhikistan, Tibet, Turkey, Turkmenistan, Tuva, Uzbekistan, West Siberia, Xin…	Feddes Repert. 89: 108 (1978)	0	L.	0	Linné, Carl von;Linnaeus, Carl
Bauhinia acuminata		1753	1753	L.	Andaman Is., Assam, Bangladesh, Borneo, China South-Central, China Southeast, Jawa, Lesser Sunda Is., Northern Territory, Philippines	Sp. Pl.: 375 (1753)	0	L.	0	Linné, Carl von;Linnaeus, Carl
Bauhinia variegata		1753	1753	L.	Bangladesh, China South-Central, East Himalaya, India, Laos, Nepal, Pakistan, Panamá, Thailand, Vietnam	Sp. Pl.: 375 (1753)	0	L.	0	Linné, Carl von;Linnaeus, Carl
Bergenia crassifolia	Saxifraga crassifolia	1753	1889	(L.) Fritsch	Altay, Amur, Buryatiya, Chita, Irkutsk, Kazakhstan, Korea, Krasnoyarsk, Mongolia, Tuva, West Siberia, Xinjiang, Yakutskiya	Verh. Zool.-Bot. Ges. Wien 39: 587 (1889)	0	L.	0	Linné, Carl von;Linnaeus, Carl
Berteroa incana	Alyssum incanum	1753	1821	(L.) DC.	Albania, Altay, Austria, Baltic States, Belarus, Bulgaria, Buryatiya, Central European Rus, China North-Central, Czechoslovakia, Denmark, East European Russia, France, Germany, Greece, Hungary, Inner Mongolia, Irkutsk, Italy, Kazakhstan, Kirgizstan, Krasnoyarsk, Krym, Manchuria, Mongolia, North Caucasus, Northwest European R, Poland, Romania, South European Russi, Switzerland, Tadzhikistan, Trans…	Syst. Nat. 2: 291 (1821)	0	L.	0	Linné, Carl von;Linnaeus, Carl
Bidens cernua		1753	1753	L.	Alabama, Alaska, Albania, Alberta, Altay, Amur, Arizona, Arkansas, Austria, Baltic States, Belarus, Belgium, British Columbia, Bulgaria, Buryatiya, California, Central European Rus, China North-Central, China South-Central, Colorado, Connecticut, Czechoslovakia, Delaware, Denmark, District of Columbia, East European Russia, Finland, France, Georgia, Germany, Great Britain, Greece, Hungary, Idaho,…	Sp. Pl.: 832 (1753)	0	L.	0	Linné, Carl von;Linnaeus, Carl
Bidens tripartita		1753	1753	L.	Afghanistan, Alabama, Alaska, Albania, Alberta, Algeria, Altay, Amur, Austria, Baltic States, Belarus, Belgium, British Columbia, Bulgaria, Buryatiya, California, Central European Rus, China North-Central, China South-Central, China Southeast, Colorado, Connecticut, Corse, Czechoslovakia, Delaware, Denmark, District of Columbia, East Aegean Is., East European Russia, East Himalaya, Finland, Franc…	Sp. Pl.: 831 (1753)	0	L.	0	Linné, Carl von;Linnaeus, Carl
Biophytum sensitivum	Oxalis sensitiva	1753	1824	(L.) DC.	Andaman Is., Assam, Bangladesh, Borneo, Cambodia, China South-Central, China Southeast, East Himalaya, Hainan, India, Jawa, Laos, Lesser Sunda Is., Malaya, Maluku, Myanmar, Nepal, Philippines, Sulawesi, Sumatera, Taiwan, Thailand, Vietnam	Prodr. 1: 690 (1824)	0	L.	0	Linné, Carl von;Linnaeus, Carl
Bistorta vivipara	Polygonum viviparum	1753	1800	(L.) Delarbre	Afghanistan, Alaska, Albania, Alberta, Aleutian Is., Altay, Amur, Arizona, Austria, Baltic States, British Columbia, Bulgaria, Buryatiya, Central European Rus, China North-Central, China South-Central, China Southeast, Chita, Colorado, Czechoslovakia, East European Russia, East Himalaya, Finland, France, Føroyar, Germany, Great Britain, Greenland, Iceland, Idaho, Inner Mongolia, Ireland, Irkutsk,…	Fl. Auvergne, ed. 2, 2: 516 (1800)	0	L.	0	Linné, Carl von;Linnaeus, Carl
Blainvillea acmella	Verbesina acmella	1753	1950	(L.) Philipson	Andaman Is., China South-Central, Hainan, India, Laos, Myanmar, Nepal, Nicobar Is., Pakistan, Queensland, Sri Lanka, Thailand, Vietnam, West Himalaya	Blumea 6: 350 (1950)	0	L.	0	Linné, Carl von;Linnaeus, Carl
Blechnum orientale		1753	1753	L.	Andaman Is., Assam, Bangladesh, Bismarck Archipelago, Borneo, Cambodia, Caroline Is., China South-Central, China Southeast, Cook Is., East Himalaya, Fiji, Hainan, India, Japan, Jawa, Laos, Lesser Sunda Is., Malaya, Maluku, Marianas, Myanmar, Nansei-shoto, Nepal, New Caledonia, New Guinea, Nicobar Is., Northern Territory, Ogasawara-shoto, Philippines, Queensland, Samoa, Santa Cruz Is., Society Is.…	Sp. Pl.: 1077 (1753)	0	L.	0	Linné, Carl von;Linnaeus, Carl
Blepharis maderaspatensis	Acanthus maderaspatensis	1753	1821	(L.) B.Heyne ex Roth	Angola, Bangladesh, Benin, Botswana, Burkina, Burundi, Cambodia, Cameroon, Cape Verde, Central African Repu, Chad, Comoros, Djibouti, Eritrea, Ethiopia, Ghana, Guinea, Guinea-Bissau, Hainan, India, Ivory Coast, Kenya, KwaZulu-Natal, Madagascar, Malawi, Mali, Mauritania, Mozambique, Myanmar, Namibia, Niger, Nigeria, Northern Provinces, Pakistan, Rwanda, Saudi Arabia, Senegal, Sierra Leone, Socotra…	Nov. Pl. Sp.: 320 (1821)	0	L.	0	Linné, Carl von;Linnaeus, Carl
Blitum virgatum		1753	1753	L.	Afghanistan, Albania, Algeria, Altay, Austria, Bulgaria, China North-Central, Cyprus, France, Greece, Iran, Iraq, Italy, Kazakhstan, Kirgizstan, Lebanon-Syria, Libya, Nepal, North Caucasus, Pakistan, Spain, Switzerland, Tadzhikistan, Transcaucasus, Turkey, Turkmenistan, Tuva, Uzbekistan, West Himalaya, Xinjiang, Yugoslavia	Sp. Pl.: 4 (1753)	0	L.	0	Linné, Carl von;Linnaeus, Carl
Blysmus compressus	Schoenus compressus	1753	1827	(L.) Panz. ex Link	Afghanistan, Albania, Austria, Baltic States, Belarus, Belgium, Bulgaria, Central European Rus, China North-Central, Czechoslovakia, Denmark, East European Russia, East Himalaya, Finland, France, Germany, Great Britain, Greece, Hungary, India, Iran, Iraq, Irkutsk, Italy, Kazakhstan, Kirgizstan, Krym, Lebanon-Syria, Morocco, Nepal, Netherlands, North Caucasus, North European Russi, Northwest Europ…	Hort. Berol. 1: 278 (1827)	0	L.	0	Linné, Carl von;Linnaeus, Carl
Boehmeria nivea	Urtica nivea	1753	1830	(L.) Gaudich.	Andaman Is., Bangladesh, Cambodia, China North-Central, China South-Central, China Southeast, Cook Is., East Himalaya, Hainan, India, Japan, Kazan-retto, Korea, Nepal, Nicobar Is., Taiwan, Thailand, Vietnam	Voy. Uranie: 499 (1830)	0	L.	0	Linné, Carl von;Linnaeus, Carl
Boerhavia diffusa		1753	1753	L.	Afghanistan, Aldabra, Argentina Northeast, Argentina Northwest, Assam, Bahamas, Bangladesh, Belize, Benin, Bolivia, Botswana, Brazil Northeast, Brazil South, Brazil Southeast, Brazil West-Central, Burkina, Burundi, Cambodia, Cameroon, Cape Provinces, Cape Verde, Cayman Is., Central African Repu, Chad, Chile Central, Chile North, China South-Central, China Southeast, Christmas I., Cocos (Keeling) …	Sp. Pl.: 3 (1753)	0	L.	0	Linné, Carl von;Linnaeus, Carl
Boerhavia repens		1753	1753	L.	Aldabra, Algeria, Andaman Is., Angola, Assam, Bangladesh, Botswana, Burkina, Cameroon, Cape Provinces, Cape Verde, Caroline Is., Central African Repu, Chad, Chagos Archipelago, China Southeast, Cocos (Keeling) Is., Comoros, Djibouti, Egypt, Eritrea, Ethiopia, Gilbert Is., Guinea, Hainan, Hawaii, India, Ivory Coast, Japan, Jawa, Kazan-retto, Kenya, Laccadive Is., Lesser Sunda Is., Libya, Maldives,…	Sp. Pl.: 3 (1753)	0	L.	0	Linné, Carl von;Linnaeus, Carl
Boesenbergia rotunda	Curcuma rotunda	1753	1958	(L.) Mansf.	Andaman Is., Assam, Cambodia, China South-Central, Jawa, Lesser Sunda Is., Malaya, Myanmar, Sumatera, Thailand, Vietnam	Kulturpflanze 6: 239 (1958)	0	L.	0	Linné, Carl von;Linnaeus, Carl
Bolboschoenus maritimus	Scirpus maritimus	1753	1905	(L.) Palla	Afghanistan, Alaska, Albania, Alberta, Altay, Amur, Argentina Northeast, Argentina Northwest, Argentina South, Arizona, Assam, Austria, Azores, Baleares, Baltic States, Bangladesh, Belarus, Belgium, Brazil South, British Columbia, Bulgaria, California, Cambodia, Cape Provinces, Cape Verde, Central European Rus, Chad, Chile Central, China North-Central, Chita, Colombia, Colorado, Connecticut, Cors…	W.D.J.Koch, Syn. Deut. Schweiz. Fl., ed. 3: 2532 (1905)	0	L.	0	Linné, Carl von;Linnaeus, Carl
Bombax ceiba		1753	1753	L.	Assam, Bangladesh, Bismarck Archipelago, Borneo, Brazil North, Cambodia, China South-Central, China Southeast, East Himalaya, Guyana, Hainan, India, Jawa, Laos, Lesser Sunda Is., Malaya, Maluku, Myanmar, New Guinea, Nicaragua, Northern Territory, Pakistan, Philippines, Solomon Is., Sri Lanka, Sulawesi, Sumatera, Taiwan, Thailand, Vietnam	Sp. Pl.: 511 (1753)	0	L.	0	Linné, Carl von;Linnaeus, Carl
Bonnaya antipoda	Ruellia antipoda	1753	1913	(L.) Druce	Bangladesh, Borneo, Cambodia, China South-Central, China Southeast, East Himalaya, India, Jawa, Laos, Malaya, Myanmar, Nansei-shoto, Nepal, New Guinea, Philippines, Queensland, Sri Lanka, Taiwan, Thailand, Vietnam	Rep. Bot. Exch. Club Soc. Brit. Isles 3: 415 (1913 publ. 1914)	0	L.	0	Linné, Carl von;Linnaeus, Carl
Bothriochloa ischaemum	Andropogon ischaemum	1753	1936	(L.) Keng	Afghanistan, Algeria, Austria, Bulgaria, China North-Central, China South-Central, China Southeast, Corse, Czechoslovakia, East Himalaya, France, Germany, Greece, Hainan, Hungary, India, Inner Mongolia, Iran, Iraq, Italy, Kazakhstan, Kirgizstan, Korea, Krym, Lebanon-Syria, Manchuria, Mongolia, Morocco, Nepal, North Caucasus, Oman, Pakistan, Poland, Portugal, Qinghai, Romania, South China Sea, Sou…	Contr. Biol. Lab. Sci. Soc. China, Bot. Ser. 10: 201 (1936)	0	L.	0	Linné, Carl von;Linnaeus, Carl
Botrychium lunaria	Osmunda lunaria	1753	1801	(L.) Sw.	Afghanistan, Alaska, Albania, Alberta, Altay, Amur, Arizona, Austria, Azores, Baltic States, Belarus, Belgium, British Columbia, Bulgaria, Buryatiya, California, Central European Rus, China North-Central, China South-Central, China Southeast, Chita, Colorado, Corse, Czechoslovakia, Denmark, East European Russia, East Himalaya, Finland, France, Føroyar, Germany, Great Britain, Greece, Greenland, H…	J. Bot. (Schrader) 1800(2): 110 (1801)	0	L.	0	Linné, Carl von;Linnaeus, Carl
Botrychium virginianum	Osmunda virginiana	1753	1801	(L.) Sw.	Alabama, Alaska, Alberta, Altay, Arizona, Arkansas, Assam, Austria, Baltic States, Belarus, Bolivia, Brazil South, Brazil Southeast, British Columbia, Buryatiya, California, Central European Rus, China North-Central, China South-Central, China Southeast, Colombia, Colorado, Connecticut, Costa Rica, Cuba, Czechoslovakia, Delaware, District of Columbia, Dominican Republic, East European Russia, Eas…	J. Bot. (Schrader) 1800(2): 111 (1801)	0	L.	0	Linné, Carl von;Linnaeus, Carl
Brachypodium pinnatum	Bromus pinnatus	1753	1812	(L.) P.Beauv.	Albania, Altay, Austria, Baltic States, Belarus, Belgium, Bulgaria, Buryatiya, Central European Rus, China North-Central, China South-Central, Chita, Corse, Cyprus, Czechoslovakia, Denmark, East Aegean Is., East European Russia, Eritrea, Finland, France, Germany, Great Britain, Greece, Hungary, Inner Mongolia, Iran, Iraq, Ireland, Irkutsk, Italy, Kazakhstan, Kirgizstan, Krasnoyarsk, Kriti, Krym, …	Ess. Agrostogr.: 101, 155 (1812)	0	L.	0	Linné, Carl von;Linnaeus, Carl
Brassica juncea	Sinapis juncea	1753	1859	(L.) Czern.	China North-Central, China South-Central, China Southeast	Consp. Pl. Charc.: 8 (1859)	1	L.	0	Linné, Carl von;Linnaeus, Carl
Brassica nigra	Sinapis nigra	1753	1833	(L.) W.D.J.Koch	Afghanistan, Albania, Algeria, Austria, Belgium, Bulgaria, China North-Central, Czechoslovakia, East Aegean Is., East Himalaya, Egypt, Ethiopia, France, Germany, Great Britain, Greece, Gulf States, Hungary, India, Iran, Iraq, Ireland, Italy, Kazakhstan, Kriti, Lebanon-Syria, Libya, Morocco, Nepal, Netherlands, Pakistan, Palestine, Poland, Qinghai, Romania, Sardegna, Sicilia, Sinai, Spain, Tibet, …	J.C.Röhling, Deutschl. Fl., ed. 3, 4: 713 (1833)	0	L.	0	Linné, Carl von;Linnaeus, Carl
Brassica oleracea		1753	1753	L.	China North-Central, France, Great Britain, Spain	Sp. Pl.: 667 (1753)	0	L.	0	Linné, Carl von;Linnaeus, Carl
Breynia fruticosa	Andrachne fruticosa	1753	1866	(L.) Müll.Arg.	China South-Central, China Southeast, Hainan, Laos, Thailand, Vietnam	A.P.de Candolle, Prodr. 15(2): 237 (1866)	0	L.	0	Linné, Carl von;Linnaeus, Carl
Bridelia retusa	Clutia retusa	1753	1824	(L.) A.Juss.	Assam, Bangladesh, Cambodia, China South-Central, China Southeast, East Himalaya, Hainan, India, Laos, Malaya, Myanmar, Nepal, Sri Lanka, Sumatera, Thailand, Vietnam, West Himalaya	Euphorb. Gen.: 109 (1824)	0	L.	0	Linné, Carl von;Linnaeus, Carl
Briza media		1753	1753	L.	Albania, Austria, Azores, Baltic States, Belarus, Belgium, Bulgaria, Canary Is., Central European Rus, China South-Central, Corse, Cyprus, Czechoslovakia, Denmark, East European Russia, East Himalaya, Finland, France, Føroyar, Germany, Great Britain, Greece, Hungary, Iran, Ireland, Irkutsk, Italy, Krasnoyarsk, Krym, Morocco, Nepal, Netherlands, North Caucasus, North European Russi, Northwest Euro…	Sp. Pl.: 70 (1753)	0	L.	0	Linné, Carl von;Linnaeus, Carl
Bromus ciliatus		1753	1753	L.	Alabama, Alaska, Alberta, Aleutian Is., Arizona, British Columbia, California, Colorado, Connecticut, Idaho, Illinois, Indiana, Inner Mongolia, Iowa, Japan, Kamchatka, Khabarovsk, Korea, Kuril Is., Labrador, Magadan, Maine, Manitoba, Maryland, Masachusettes, Minnesota, Mongolia, Montana, Nebraska, New Brunswick, New Hampshire, New Mexico, New York, Newfoundland, North Carolina, North Dakota, Nort…	Sp. Pl.: 76 (1753)	0	L.	0	Linné, Carl von;Linnaeus, Carl
Bromus hordeaceus		1753	1753	L.	Albania, Algeria, Altay, Austria, Azores, Baleares, Baltic States, Belarus, Belgium, Bulgaria, Buryatiya, Canary Is., Central European Rus, China North-Central, Chita, Corse, Cyprus, Czechoslovakia, Denmark, East Aegean Is., East European Russia, East Himalaya, Egypt, Finland, France, Germany, Great Britain, Greece, Hungary, Ireland, Irkutsk, Italy, Kazakhstan, Kirgizstan, Krasnoyarsk, Kriti, Kry…	Sp. Pl.: 77 (1753)	0	L.	0	Linné, Carl von;Linnaeus, Carl
Bromus secalinus		1753	1753	L.	Belarus, Bulgaria, Buryatiya, China North-Central, Corse, France, Greece, Hungary, Iran, Italy, Kazakhstan, Krasnoyarsk, Lebanon-Syria, Portugal, Romania, Sardegna, Sicilia, Spain, Tibet, Transcaucasus, Turkey, Turkey-in-Europe, Ukraine, West Siberia, Xinjiang, Yugoslavia	Sp. Pl.: 76 (1753)	0	L.	0	Linné, Carl von;Linnaeus, Carl
Bromus squarrosus		1753	1753	L.	Albania, Algeria, Altay, Austria, Baleares, Bulgaria, Central European Rus, China North-Central, Cyprus, Czechoslovakia, East European Russia, France, Greece, Hungary, Iran, Iraq, Italy, Kazakhstan, Kirgizstan, Krasnoyarsk, Kriti, Krym, Lebanon-Syria, Mongolia, Morocco, North Caucasus, Northwest European R, Palestine, Romania, South European Russi, Spain, Switzerland, Tadzhikistan, Transcaucasus,…	Sp. Pl.: 76 (1753)	0	L.	0	Linné, Carl von;Linnaeus, Carl
Bromus tectorum		1753	1753	L.	Afghanistan, Algeria, Austria, Belgium, Bulgaria, Central European Rus, China North-Central, China South-Central, Corse, Cyprus, Czechoslovakia, Denmark, East Aegean Is., East European Russia, East Himalaya, France, Germany, Greece, Hungary, Inner Mongolia, Iran, Iraq, Italy, Kazakhstan, Kirgizstan, Kriti, Krym, Kuwait, Lebanon-Syria, Mongolia, Morocco, Nepal, Netherlands, North Caucasus, Northwe…	Sp. Pl.: 77 (1753)	0	L.	0	Linné, Carl von;Linnaeus, Carl
Broussonetia papyrifera	Morus papyrifera	1753	1799	(L.) L'Hér. ex Vent.	Bangladesh, Cambodia, China North-Central, China South-Central, China Southeast, Hainan, India, Korea, Laos, Malaya, Myanmar, Sulawesi, Sumatera, Taiwan, Thailand, Tibet, Vietnam	Tabl. Règn. Vég. 3: 547 (1799)	0	L.	0	Linné, Carl von;Linnaeus, Carl
Brucea javanica	Rhus javanica	1753	1928	(L.) Merr.	Andaman Is., Bismarck Archipelago, Borneo, Cambodia, China South-Central, China Southeast, Hainan, India, Jawa, Laos, Lesser Sunda Is., Malaya, Maluku, Myanmar, New Guinea, Northern Territory, Queensland, Sri Lanka, Sulawesi, Sumatera, Taiwan, Thailand, Vietnam	J. Arnold Arbor. 9: 3 (1928)	0	L.	0	Linné, Carl von;Linnaeus, Carl
Bruguiera cylindrica	Rhizophora cylindrica	1753	1827	(L.) Blume	Andaman Is., Bangladesh, Bismarck Archipelago, Borneo, Cambodia, Hainan, India, Jawa, Laccadive Is., Lesser Sunda Is., Malaya, Maldives, Maluku, Myanmar, New Guinea, Philippines, Queensland, Sri Lanka, Sulawesi, Sumatera, Thailand, Vietnam	Enum. Pl. Javae 1: 91 (1827)	0	L.	0	Linné, Carl von;Linnaeus, Carl
Bruguiera gymnorhiza	Rhizophora gymnorhiza	1753	1798	(L.) Lam.	Aldabra, Andaman Is., Bangladesh, Borneo, Cambodia, Cape Provinces, Caroline Is., China Southeast, Christmas I., Djibouti, Fiji, Gilbert Is., Hainan, India, Jawa, Kenya, KwaZulu-Natal, Lesser Sunda Is., Madagascar, Malaya, Maluku, Marshall Is., Mauritius, Mozambique, Mozambique Channel I, Myanmar, Nansei-shoto, Nauru, New Guinea, Nicobar Is., Northern Territory, Philippines, Queensland, Samoa, Se…	Encycl. 4: 696 (1798)	0	L.	0	Linné, Carl von;Linnaeus, Carl
Buglossoides arvensis	Lithospermum arvense	1753	1954	(L.) I.M.Johnst.	Afghanistan, Albania, Algeria, Altay, Austria, Baleares, Baltic States, Belarus, Belgium, Bulgaria, Buryatiya, Canary Is., Central European Rus, China North-Central, China Southeast, Corse, Cyprus, Czechoslovakia, Denmark, East Aegean Is., East European Russia, Egypt, Finland, France, Germany, Great Britain, Greece, Hungary, Iran, Iraq, Ireland, Irkutsk, Italy, Kazakhstan, Kirgizstan, Korea, Kras…	J. Arnold Arbor. 35: 42 (1954)	0	L.	0	Linné, Carl von;Linnaeus, Carl
Burmannia disticha		1753	1753	L.	Borneo, Cambodia, China South-Central, China Southeast, East Himalaya, Hainan, India, Laos, Myanmar, Nepal, New Guinea, New South Wales, Queensland, Sri Lanka, Sulawesi, Sumatera, Thailand, Vietnam	Sp. Pl.: 287 (1753)	0	L.	0	Linné, Carl von;Linnaeus, Carl
Butomus umbellatus		1753	1753	L.	Afghanistan, Albania, Algeria, Altay, Amur, Austria, Baltic States, Belarus, Belgium, Bulgaria, Buryatiya, Central European Rus, China North-Central, China South-Central, China Southeast, Chita, Czechoslovakia, Denmark, East European Russia, Finland, France, Germany, Great Britain, Greece, Hungary, Inner Mongolia, Iran, Iraq, Ireland, Irkutsk, Italy, Kazakhstan, Khabarovsk, Kirgizstan, Krasnoyars…	Sp. Pl.: 372 (1753)	0	L.	0	Linné, Carl von;Linnaeus, Carl
Cajanus scarabaeoides	Dolichos scarabaeoides	1753	1806	(L.) Thouars	Assam, Bangladesh, Cambodia, China South-Central, China Southeast, Comoros, East Himalaya, Hainan, India, Laos, Lesser Sunda Is., Madagascar, Malaya, Myanmar, Nansei-shoto, Nepal, New Guinea, Nicobar Is., Pakistan, Philippines, Queensland, South China Sea, Sri Lanka, Sumatera, Taiwan, Thailand, Vietnam, West Himalaya	G.-F.Cuvier, Dict. Sci. Nat. 6: 167 (1806)	0	L.	0	Linné, Carl von;Linnaeus, Carl
Calamagrostis arundinacea	Agrostis arundinacea	1753	1788	(L.) Roth	Albania, Altay, Amur, Austria, Baltic States, Belarus, Belgium, Bulgaria, Buryatiya, Central European Rus, China North-Central, China South-Central, China Southeast, Chita, Czechoslovakia, Denmark, East European Russia, East Himalaya, Finland, France, Germany, Greece, Hungary, Inner Mongolia, Irkutsk, Italy, Japan, Kazakhstan, Khabarovsk, Korea, Krasnoyarsk, Magadan, Manchuria, New Guinea, North …	Tent. Fl. Germ. 1: 33 (1788)	0	L.	0	Linné, Carl von;Linnaeus, Carl
Calamagrostis epigejos	Arundo epigejos	1753	1788	(L.) Roth	Afghanistan, Albania, Altay, Austria, Baltic States, Belarus, Belgium, Bulgaria, Buryatiya, Cape Provinces, Central European Rus, China North-Central, Chita, Corse, Cyprus, Czechoslovakia, Denmark, East European Russia, Ethiopia, Finland, France, Germany, Great Britain, Greece, Hungary, Inner Mongolia, Iran, Iraq, Ireland, Irkutsk, Italy, Japan, Kazakhstan, Kenya, Kirgizstan, Korea, Krasnoyarsk, …	Tent. Fl. Germ. 1: 34 (1788)	0	L.	0	Linné, Carl von;Linnaeus, Carl
Calla palustris		1753	1753	L.	Alaska, Alberta, Altay, Amur, Austria, Baltic States, Belarus, Belgium, British Columbia, Buryatiya, Central European Rus, Chita, Connecticut, Czechoslovakia, Denmark, East European Russia, Finland, France, Germany, Illinois, Indiana, Inner Mongolia, Irkutsk, Japan, Kamchatka, Khabarovsk, Korea, Krasnoyarsk, Kuril Is., Maine, Manchuria, Manitoba, Maryland, Masachusettes, Michigan, Minnesota, Neth…	Sp. Pl.: 968 (1753)	0	L.	0	Linné, Carl von;Linnaeus, Carl
Callistephus chinensis	Aster chinensis	1753	1832	(L.) Nees	China North-Central, China South-Central, China Southeast, Inner Mongolia, Manchuria, Primorye, Xinjiang	Gen. Sp. Aster.: 222 (1832)	0	L.	0	Linné, Carl von;Linnaeus, Carl
Callitriche palustris		1753	1753	L.	Afghanistan, Alaska, Albania, Alberta, Aleutian Is., Altay, Amur, Arizona, Austria, Baltic States, Bangladesh, Belarus, Belgium, Borneo, British Columbia, Bulgaria, Buryatiya, California, Central European Rus, China North-Central, China South-Central, China Southeast, Chita, Colorado, Connecticut, Corse, Czechoslovakia, Delaware, Denmark, East European Russia, East Himalaya, Finland, France, Germ…	Sp. Pl.: 969 (1753)	0	L.	0	Linné, Carl von;Linnaeus, Carl
Calophyllum inophyllum		1753	1753	L.	Aldabra, Andaman Is., Bangladesh, Bismarck Archipelago, Borneo, Cambodia, Caroline Is., Chagos Archipelago, Christmas I., Cocos (Keeling) Is., Comoros, Cook Is., Fiji, Gilbert Is., Hainan, Hawaii, India, Jawa, Kazan-retto, Kenya, Laccadive Is., Laos, Lesser Sunda Is., Madagascar, Malaya, Maldives, Maluku, Marianas, Marshall Is., Mauritius, Mozambique, Mozambique Channel I, Myanmar, Nansei-shoto, …	Sp. Pl.: 513 (1753)	0	L.	0	Linné, Carl von;Linnaeus, Carl
Calotropis gigantea	Asclepias gigantea	1753	1811	(L.) W.T.Aiton	Assam, Bangladesh, Cambodia, China South-Central, China Southeast, East Himalaya, Hainan, India, Jawa, Laccadive Is., Laos, Malaya, Maldives, Myanmar, Nepal, Sri Lanka, Sulawesi, Thailand, Vietnam	Hortus Kew. 2: 78 (1811)	0	L.	0	Linné, Carl von;Linnaeus, Carl
Caltha palustris		1753	1753	L.	Afghanistan, Alaska, Albania, Alberta, Aleutian Is., Altay, Amur, Austria, Baleares, Baltic States, Belarus, Belgium, British Columbia, Bulgaria, Buryatiya, Central European Rus, China North-Central, China South-Central, China Southeast, Chita, Connecticut, Czechoslovakia, Delaware, Denmark, East European Russia, East Himalaya, Finland, France, Føroyar, Germany, Great Britain, Greece, Hungary, Ic…	Sp. Pl.: 558 (1753)	0	L.	0	Linné, Carl von;Linnaeus, Carl
Calypso bulbosa	Cypripedium bulbosum	1753	1842	(L.) Oakes	Alaska, Alberta, Aleutian Is., Amur, Arizona, Baltic States, British Columbia, Buryatiya, California, Central European Rus, China North-Central, China South-Central, Colorado, East European Russia, Finland, Idaho, Inner Mongolia, Irkutsk, Japan, Khabarovsk, Korea, Krasnoyarsk, Labrador, Maine, Manchuria, Manitoba, Michigan, Minnesota, Mongolia, Montana, New Brunswick, New Hampshire, New Mexico, N…	Cat. Vermont Pl.: 28 (1842)	0	L.	0	Linné, Carl von;Linnaeus, Carl
Calystegia sepium	Convolvulus sepium	1753	1810	(L.) R.Br.	Afghanistan, Alabama, Albania, Alberta, Algeria, Altay, Amur, Arizona, Austria, Azores, Baleares, Baltic States, Belarus, Belgium, British Columbia, Bulgaria, California, Cape Provinces, Central European Rus, China North-Central, Colorado, Connecticut, Corse, Cyprus, Czechoslovakia, Delaware, Denmark, District of Columbia, East Aegean Is., East European Russia, Easter Is., Finland, Florida, Franc…	Prodr. Fl. Nov. Holland.: 483 (1810)	0	L.	0	Linné, Carl von;Linnaeus, Carl
Calystegia soldanella	Convolvulus soldanella	1753	1810	(L.) R.Br.	Albania, Algeria, Argentina Northeast, Azores, Baleares, Belgium, British Columbia, Bulgaria, California, Canary Is., Cape Provinces, Chatham Is., Chile Central, Chile South, China North-Central, China Southeast, Corse, Denmark, East Aegean Is., France, Galápagos, Germany, Great Britain, Greece, Iran, Ireland, Italy, Japan, Kermadec Is., Korea, Kriti, Krym, Kuril Is., Lebanon-Syria, Libya, Madeir…	Prodr. Fl. Nov. Holland.: 483 (1810)	0	L.	0	Linné, Carl von;Linnaeus, Carl
Camelina sativa	Myagrum sativum	1753	1762	(L.) Crantz	Albania, Altay, Amur, Bulgaria, Buryatiya, Central European Rus, Chita, East European Russia, Hungary, Inner Mongolia, Irkutsk, Italy, Khabarovsk, Kirgizstan, Krasnoyarsk, Krym, Lebanon-Syria, Mongolia, North Caucasus, Pakistan, Primorye, Romania, South European Russi, Tadzhikistan, Turkey, Turkey-in-Europe, Turkmenistan, Tuva, Ukraine, West Himalaya, West Siberia, Xinjiang, Yakutskiya	Stirp. Austr. Fasc. 1: 17 (1762)	0	L.	0	Linné, Carl von;Linnaeus, Carl
Camellia japonica		1753	1753	L.	China North-Central, China Southeast, Japan, Korea, Nansei-shoto, Taiwan	Sp. Pl.: 698 (1753)	0	L.	0	Linné, Carl von;Linnaeus, Carl
Camellia sinensis	Thea sinensis	1753	1887	(L.) Kuntze	China South-Central, China Southeast	Trudy Imp. S.-Peterburgsk. Bot. Sada 10: 195 (1887)	1	L.	0	Linné, Carl von;Linnaeus, Carl
Campanula glomerata		1753	1753	L.	Albania, Altay, Amur, Austria, Baltic States, Belarus, Belgium, Bulgaria, Buryatiya, Central European Rus, Chita, Czechoslovakia, Denmark, East European Russia, Finland, France, Germany, Great Britain, Greece, Hungary, Inner Mongolia, Iran, Iraq, Irkutsk, Italy, Japan, Kazakhstan, Khabarovsk, Kirgizstan, Korea, Krasnoyarsk, Krym, Manchuria, Mongolia, Netherlands, North Caucasus, North European Ru…	Sp. Pl.: 166 (1753)	0	L.	0	Linné, Carl von;Linnaeus, Carl
Campanula sibirica		1753	1753	L.	Albania, Altay, Austria, Baltic States, Belarus, Bulgaria, Central European Rus, Czechoslovakia, East European Russia, Germany, Hungary, Iran, Italy, Kazakhstan, Krasnoyarsk, Krym, North Caucasus, Northwest European R, Poland, Romania, South European Russi, Transcaucasus, Turkey, Tuva, Ukraine, West Siberia, Xinjiang, Yugoslavia	Sp. Pl.: 167 (1753)	0	L.	0	Linné, Carl von;Linnaeus, Carl
Camphorosma monspeliaca		1753	1753	L.	Albania, Algeria, Altay, Bulgaria, Central European Rus, Corse, East European Russia, France, Greece, Italy, Krym, Libya, Mongolia, Morocco, North Caucasus, Sardegna, Sicilia, South European Russi, Transcaucasus, Tunisia, Turkey, Ukraine, Xinjiang, Yugoslavia	Sp. Pl.: 122 (1753)	0	L.	0	Linné, Carl von;Linnaeus, Carl
Cannabis sativa		1753	1753	L.	Afghanistan, Iran, Kazakhstan, Kirgizstan, Pakistan, South European Russi, Tadzhikistan, Turkmenistan, Uzbekistan, Xinjiang	Sp. Pl.: 1027 (1753)	0	L.	0	Linné, Carl von;Linnaeus, Carl
Capsella bursa-pastoris	Thlaspi bursa-pastoris	1753	1792	(L.) Medik.	Afghanistan, Albania, Algeria, Altay, Amur, Austria, Baleares, Baltic States, Belarus, Belgium, Bulgaria, Buryatiya, Central European Rus, China North-Central, China South-Central, China Southeast, Chita, Corse, Cyprus, Czechoslovakia, Denmark, East Aegean Is., East European Russia, East Himalaya, Egypt, Finland, France, Føroyar, Germany, Great Britain, Greece, Gulf States, Hungary, Iceland, Indi…	Pfl.-Gatt.: 85 (1792)	0	L.	0	Linné, Carl von;Linnaeus, Carl
Caragana frutex	Robinia frutex	1753	1869	(L.) K.Koch	Altay, Bulgaria, Central European Rus, East European Russia, Kazakhstan, Kirgizstan, Krasnoyarsk, Krym, North Caucasus, South European Russi, Ukraine, West Siberia, Xinjiang	Dendrologie 1: 48 (1869)	0	L.	0	Linné, Carl von;Linnaeus, Carl
Caragana pygmaea	Robinia pygmaea	1753	1825	(L.) DC.	Altay, Buryatiya, Inner Mongolia, Irkutsk, Kazakhstan, Krasnoyarsk, Manchuria, Mongolia, Tuva, West Siberia, Xinjiang	Prodr. 2: 268 (1825)	0	L.	0	Linné, Carl von;Linnaeus, Carl
Cardamine bellidifolia		1753	1753	L.	Alaska, Alberta, Aleutian Is., Altay, Amur, British Columbia, Buryatiya, California, Chita, East European Russia, Finland, Greenland, Iceland, Irkutsk, Kamchatka, Kazakhstan, Khabarovsk, Korea, Krasnoyarsk, Labrador, Magadan, Maine, Mongolia, New Hampshire, North European Russi, Northwest Territorie, Norway, Nunavut, Oregon, Primorye, Québec, Sakhalin, Svalbard, Sweden, Tuva, Washington, West Sib…	Sp. Pl.: 654 (1753)	0	L.	0	Linné, Carl von;Linnaeus, Carl
Cardamine hirsuta		1753	1753	L.	Albania, Algeria, Austria, Azores, Baleares, Baltic States, Belarus, Belgium, Borneo, Bulgaria, Cameroon, Canary Is., China North-Central, China South-Central, China Southeast, Congo, Corse, Cyprus, Czechoslovakia, Denmark, East Aegean Is., East Himalaya, Eritrea, Ethiopia, Finland, France, Føroyar, Gabon, Germany, Great Britain, Greece, Gulf of Guinea Is., Hungary, India, Inner Mongolia, Iran, I…	Sp. Pl.: 655 (1753)	0	L.	0	Linné, Carl von;Linnaeus, Carl
Cardamine impatiens		1753	1753	L.	Afghanistan, Albania, Altay, Austria, Baltic States, Belarus, Belgium, Bulgaria, Central European Rus, China North-Central, China South-Central, China Southeast, Corse, Czechoslovakia, Denmark, East European Russia, East Himalaya, Finland, France, Germany, Great Britain, Greece, Hungary, India, Iran, Ireland, Irkutsk, Italy, Kazakhstan, Khabarovsk, Kirgizstan, Korea, Krasnoyarsk, Krym, Kuril Is.,…	Sp. Pl.: 655 (1753)	0	L.	0	Linné, Carl von;Linnaeus, Carl
Cardamine pratensis		1753	1753	L.	Albania, Altay, Amur, Austria, Azores, Baltic States, Belarus, Belgium, Bulgaria, Buryatiya, Central European Rus, Chita, Connecticut, Czechoslovakia, Denmark, East European Russia, Ethiopia, Finland, France, Germany, Great Britain, Greenland, Hungary, Illinois, Indiana, Inner Mongolia, Ireland, Irkutsk, Italy, Japan, Kazakhstan, Khabarovsk, Korea, Krasnoyarsk, Kuril Is., Maine, Manchuria, Masach…	Sp. Pl.: 656 (1753)	0	L.	0	Linné, Carl von;Linnaeus, Carl
Cardiospermum halicacabum		1753	1753	L.	Angola, Argentina Northeast, Argentina Northwest, Assam, Bahamas, Bangladesh, Benin, Bismarck Archipelago, Bolivia, Borneo, Botswana, Brazil North, Brazil Northeast, Brazil South, Brazil Southeast, Brazil West-Central, Burkina, Burundi, Cambodia, Cameroon, Cape Verde, Cayman Is., Central African Repu, Chad, Chile Central, China South-Central, China Southeast, Colombia, Congo, Costa Rica, Cuba, Do…	Sp. Pl.: 366 (1753)	0	L.	0	Linné, Carl von;Linnaeus, Carl
Carduus acanthoides		1753	1753	L.	Albania, Austria, Baltic States, Belarus, Belgium, Bulgaria, Central European Rus, China North-Central, China South-Central, China Southeast, Czechoslovakia, Denmark, East European Russia, France, Germany, Great Britain, Greece, Hungary, Inner Mongolia, Ireland, Italy, Japan, Kazakhstan, Kirgizstan, Korea, Krym, Libya, Netherlands, North Caucasus, Northwest European R, Norway, Pakistan, Poland, Q…	Sp. Pl.: 821 (1753)	0	L.	0	Linné, Carl von;Linnaeus, Carl
Carduus nutans		1753	1753	L.	Altay, Austria, Baltic States, Belarus, Belgium, Bulgaria, Buryatiya, Central European Rus, Chita, Czechoslovakia, Denmark, East Aegean Is., East European Russia, France, Germany, Great Britain, Greece, Ireland, Irkutsk, Italy, Kazakhstan, Kirgizstan, Krasnoyarsk, Mongolia, Netherlands, Northwest European R, Romania, Sicilia, Spain, Sweden, Switzerland, Tadzhikistan, Tuva, Ukraine, Uzbekistan, We…	Sp. Pl.: 821 (1753)	0	L.	0	Linné, Carl von;Linnaeus, Carl
Carex atrata		1753	1753	L.	Austria, China South-Central, Czechoslovakia, East European Russia, East Himalaya, Finland, France, Føroyar, Germany, Great Britain, Greece, Greenland, Iceland, Italy, Japan, Korea, Manchuria, Nepal, North Caucasus, North European Russi, Norway, Poland, Primorye, Romania, Spain, Sweden, Switzerland, Taiwan, Tibet, Transcaucasus, Turkey, Ukraine, West Siberia, Yugoslavia; Doubtfully present in: Be…	Sp. Pl.: 976 (1753)	0	L.	0	Linné, Carl von;Linnaeus, Carl
Carex canescens		1753	1753	L.	Alaska, Albania, Alberta, Aleutian Is., Altay, Argentina Northeast, Argentina South, Arizona, Austria, Baltic States, Belarus, Belgium, British Columbia, Bulgaria, California, Central European Rus, Chile Central, Chile South, Colorado, Connecticut, Czechoslovakia, Delaware, Denmark, District of Columbia, East European Russia, Falkland Is., Finland, France, Germany, Great Britain, Greece, Greenlan…	Sp. Pl.: 974 (1753)	0	L.	0	Linné, Carl von;Linnaeus, Carl
Carex capillaris		1753	1753	L.	Alaska, Alberta, Altay, Austria, Baltic States, Belarus, British Columbia, California, Central European Rus, China North-Central, Colorado, Czechoslovakia, East European Russia, Finland, France, Føroyar, Germany, Great Britain, Greenland, Iceland, Idaho, Inner Mongolia, Italy, Japan, Kazakhstan, Khabarovsk, Kirgizstan, Korea, Krasnoyarsk, Kuril Is., Labrador, Magadan, Maine, Manchuria, Manitoba, …	Sp. Pl.: 977 (1753)	0	L.	0	Linné, Carl von;Linnaeus, Carl
Carex cespitosa		1753	1753	L.	Albania, Altay, Amur, Austria, Baltic States, Belarus, Bulgaria, Central European Rus, Czechoslovakia, Denmark, East European Russia, Finland, France, Germany, Hungary, Inner Mongolia, Italy, Japan, Kazakhstan, Khabarovsk, Korea, Krasnoyarsk, Magadan, Manchuria, Mongolia, Netherlands, North Caucasus, North European Russi, Northwest European R, Norway, Poland, Primorye, Qinghai, Romania, Sakhalin,…	Sp. Pl.: 978 (1753)	0	L.	0	Linné, Carl von;Linnaeus, Carl
Carex globularis		1753	1753	L.	Altay, Baltic States, Belarus, Central European Rus, East European Russia, Finland, Inner Mongolia, Irkutsk, Kamchatka, Khabarovsk, Korea, Krasnoyarsk, Magadan, Manchuria, Mongolia, North European Russi, Northwest European R, Norway, Poland, Sakhalin, Sweden, West Siberia, Yakutskiya	Sp. Pl.: 976 (1753)	0	L.	0	Linné, Carl von;Linnaeus, Carl
Carex leporina		1753	1753	L.	Albania, Algeria, Altay, Amur, Austria, Azores, Baltic States, Belarus, Belgium, British Columbia, Bulgaria, California, Central European Rus, Corse, Czechoslovakia, Denmark, East European Russia, Finland, France, Føroyar, Germany, Great Britain, Greece, Hungary, Ireland, Irkutsk, Italy, Khabarovsk, Krasnoyarsk, Lebanon-Syria, Mongolia, Morocco, Netherlands, Nevada, North Caucasus, North European…	Sp. Pl.: 973 (1753)	0	L.	0	Linné, Carl von;Linnaeus, Carl
Carex pseudocyperus		1753	1753	L.	Albania, Alberta, Algeria, Altay, Austria, Baltic States, Belarus, Belgium, Bulgaria, Canary Is., Central European Rus, China North-Central, Connecticut, Corse, Czechoslovakia, Denmark, East European Russia, Finland, France, Germany, Great Britain, Greece, Hungary, Ireland, Italy, Japan, Kazakhstan, Kirgizstan, Krym, Lebanon-Syria, Maine, Manitoba, Masachusettes, Michigan, Minnesota, Morocco, Net…	Sp. Pl.: 978 (1753)	0	L.	0	Linné, Carl von;Linnaeus, Carl
Carex vulpina		1753	1753	L.	Albania, Altay, Austria, Baltic States, Belarus, Belgium, Bulgaria, Central European Rus, Corse, Czechoslovakia, Denmark, East European Russia, Finland, France, Germany, Great Britain, Hungary, Italy, Kazakhstan, Krym, Netherlands, North Caucasus, North European Russi, Northwest European R, Norway, Poland, Romania, South European Russi, Spain, Sweden, Switzerland, Transcaucasus, Ukraine, Uzbekist…	Sp. Pl.: 973 (1753)	0	L.	0	Linné, Carl von;Linnaeus, Carl
Carpesium abrotanoides		1753	1753	L.	Afghanistan, Albania, Altay, Austria, Belgium, Bulgaria, China North-Central, China South-Central, China Southeast, East Himalaya, Georgia, Germany, Greece, Hainan, Hungary, Iran, Iraq, Italy, Japan, Kazakhstan, Korea, Nepal, Netherlands, North Caucasus, Pakistan, Poland, Romania, Switzerland, Taiwan, Tibet, Transcaucasus, Turkey, Turkey-in-Europe, West Himalaya, Xinjiang, Yugoslavia	Sp. Pl.: 860 (1753)	0	L.	0	Linné, Carl von;Linnaeus, Carl
Carpesium cernuum		1753	1753	L.	Afghanistan, Austria, Borneo, Bulgaria, China North-Central, China South-Central, China Southeast, Corse, Czechoslovakia, France, Hungary, Iran, Italy, Japan, Korea, Manchuria, Nansei-shoto, North Caucasus, Pakistan, Philippines, Primorye, Romania, Spain, Switzerland, Taiwan, Tibet, Transcaucasus, Turkey, Ukraine, West Himalaya, Yugoslavia; Extinct in: Germany	Sp. Pl.: 859 (1753)	0	L.	0	Linné, Carl von;Linnaeus, Carl
Carum carvi		1753	1753	L.	Afghanistan, Albania, Altay, Amur, Austria, Baltic States, Bangladesh, Belgium, Bulgaria, Buryatiya, Central European Rus, China North-Central, China South-Central, Chita, Czechoslovakia, Denmark, East European Russia, East Himalaya, Finland, France, Germany, Hungary, India, Inner Mongolia, Iran, Iraq, Irkutsk, Italy, Kamchatka, Kazakhstan, Khabarovsk, Kirgizstan, Krasnoyarsk, Krym, Kuril Is., Ma…	Sp. Pl.: 263 (1753)	0	L.	0	Linné, Carl von;Linnaeus, Carl
Cassytha filiformis		1753	1753	L.	Aldabra, Andaman Is., Angola, Bahamas, Bangladesh, Belize, Benin, Bolivia, Botswana, Brazil North, Brazil Northeast, Brazil South, Brazil Southeast, Brazil West-Central, Burkina, Burundi, Cambodia, Cameroon, Cape Provinces, Caroline Is., Cayman Is., Central African Repu, Chad, Chagos Archipelago, China South-Central, China Southeast, Cocos (Keeling) Is., Colombia, Congo, Cook Is., Costa Rica, Cub…	Sp. Pl.: 35 (1753)	0	L.	0	Linné, Carl von;Linnaeus, Carl
Castilleja pallida	Bartsia pallida	1753	1823	(L.) Kunth	Alaska, Altay, Amur, Buryatiya, Chita, East European Russia, Inner Mongolia, Irkutsk, Kamchatka, Kazakhstan, Khabarovsk, Krasnoyarsk, Magadan, Manchuria, Mongolia, Northwest Territorie, Nunavut, Primorye, Sakhalin, Tuva, West Siberia, Yakutskiya, Yukon	Syn. Pl. Aequin. 2: 100 (1823)	0	L.	0	Linné, Carl von;Linnaeus, Carl
Catabrosa aquatica	Aira aquatica	1753	1812	(L.) P.Beauv.	Afghanistan, Albania, Alberta, Algeria, Altay, Argentina South, Arizona, Arkansas, Austria, Baltic States, Belarus, Belgium, British Columbia, Bulgaria, Buryatiya, Central European Rus, Chile South, China North-Central, China South-Central, Chita, Colorado, Corse, Czechoslovakia, Denmark, East European Russia, East Himalaya, Finland, France, Føroyar, Germany, Great Britain, Greece, Greenland, Hun…	Ess. Agrostogr.: 97 (1812)	0	L.	0	Linné, Carl von;Linnaeus, Carl
Catolobus pendulus	Arabis pendula	1753	2005	(L.) Al-Shehbaz	Altay, Amur, Belarus, Buryatiya, Central European Rus, China North-Central, China South-Central, China Southeast, Chita, East European Russia, Inner Mongolia, Irkutsk, Japan, Kamchatka, Kazakhstan, Khabarovsk, Kirgizstan, Korea, Krasnoyarsk, Kuril Is., Magadan, Manchuria, Mongolia, North European Russi, Primorye, Qinghai, Sakhalin, South European Russi, Tibet, Tuva, Ukraine, West Siberia, Xinjian…	Novon 15: 521 (2005)	0	L.	0	Linné, Carl von;Linnaeus, Carl
Causonis trifolia	Vitis trifolia	1753	2017	(L.) Mabb. & J.Wen	Andaman Is., Assam, Bangladesh, Borneo, Cambodia, China South-Central, Christmas I., East Himalaya, India, Jawa, Laccadive Is., Laos, Malaya, Myanmar, Nepal, New Caledonia, New Guinea, Nicobar Is., Northern Territory, Pakistan, Philippines, Queensland, Solomon Is., South China Sea, Sri Lanka, Thailand, Vanuatu, Vietnam, West Himalaya, Western Australia	Mabberley&#x27;s Pl.-Book, ed. 4: 1101 (2017)	0	L.	0	Linné, Carl von;Linnaeus, Carl
Cenchrus alopecuroides	Panicum alopecuroides	1753	1794	(L.) Thunb.	Andaman Is., China North-Central, China South-Central, China Southeast, Hainan, Japan, Jawa, Korea, Malaya, Manchuria, Myanmar, Nansei-shoto, New South Wales, Nicobar Is., Ogasawara-shoto, Philippines, Queensland, Taiwan, Tibet, Vietnam, Western Australia	Prodr. Pl. Cap.: 24 (1794)	0	L.	0	Linné, Carl von;Linnaeus, Carl
Centaurea benedicta	Cnicus benedictus	1753	1763	(L.) L.	Afghanistan, Albania, Bulgaria, Cyprus, Czechoslovakia, East Aegean Is., Greece, Iran, Iraq, Italy, Kazakhstan, Kirgizstan, Kriti, Krym, Lebanon-Syria, North Caucasus, Pakistan, Palestine, Portugal, Sardegna, Saudi Arabia, Sinai, South European Russi, Spain, Tadzhikistan, Transcaucasus, Turkey, Turkey-in-Europe, Turkmenistan, Ukraine, Uzbekistan, Xinjiang, Yugoslavia	Sp. Pl., ed. 2, 2: 1296 (1763)	0	L.	0	Linné, Carl von;Linnaeus, Carl
Centella asiatica	Hydrocotyle asiatica	1753	1879	(L.) Urb.	Andaman Is., Angola, Assam, Bangladesh, Belize, Benin, Borneo, Botswana, Burkina, Burundi, Cabinda, Cambodia, Cameroon, Cape Provinces, Cape Verde, Caprivi Strip, Central African Repu, Chad, Chatham Is., China North-Central, China South-Central, China Southeast, Comoros, Congo, East Himalaya, Equatorial Guinea, Eritrea, Ethiopia, Fiji, Free State, Gabon, Gambia, Ghana, Guinea, Guinea-Bissau, Gulf…	C.F.P.von Martius &amp; auct. suc. (eds.), Fl. Bras. 11(1): 287 (1879)	0	L.	0	Linné, Carl von;Linnaeus, Carl
Centipeda minima	Artemisia minima	1753	1867	(L.) A.Braun & Asch.	Amur, Andaman Is., Bangladesh, China North-Central, China South-Central, China Southeast, East Himalaya, Fiji, Hainan, India, Inner Mongolia, Japan, Jawa, Khabarovsk, Korea, Laos, Malaya, Manchuria, Myanmar, Nansei-shoto, Nepal, New Caledonia, New Guinea, New South Wales, Northern Territory, Pakistan, Philippines, Primorye, Qinghai, Queensland, Samoa, Society Is., South Australia, Sri Lanka, Taiw…	Index Seminum (B, Berolinensis) 1867(App. 1): 6 (1867)	0	L.	0	Linné, Carl von;Linnaeus, Carl
Cephalanthera longifolia	Serapias helleborine var. longifolia	1753	1888	(L.) Fritsch	Afghanistan, Albania, Algeria, Assam, Austria, Baleares, Baltic States, Belarus, Belgium, Bulgaria, Central European Rus, China North-Central, China South-Central, China Southeast, Corse, Czechoslovakia, Denmark, East Aegean Is., East European Russia, East Himalaya, Finland, France, Germany, Great Britain, Greece, Hungary, Iran, Ireland, Italy, Japan, Kazakhstan, Kirgizstan, Krym, Lebanon-Syria, …	Oesterr. Bot. Z. 38: 81 (1888)	0	L.	0	Linné, Carl von;Linnaeus, Carl
Cerastium maximum		1753	1753	L.	Alaska, Altay, Buryatiya, Irkutsk, Kamchatka, Khabarovsk, Krasnoyarsk, Magadan, North European Russi, Northwest Territorie, West Siberia, Xinjiang, Yakutskiya, Yukon	Sp. Pl.: 439 (1753)	0	L.	0	Linné, Carl von;Linnaeus, Carl
Ceratocarpus arenarius		1753	1753	L.	Afghanistan, Altay, Bulgaria, Central European Rus, East European Russia, Iran, Kazakhstan, Kirgizstan, Krym, Mongolia, North Caucasus, Pakistan, Romania, South European Russi, Tadzhikistan, Transcaucasus, Turkey, Turkmenistan, Tuva, Uzbekistan, West Siberia, Xinjiang	Sp. Pl.: 969 (1753)	0	L.	0	Linné, Carl von;Linnaeus, Carl
Ceratophyllum demersum		1753	1753	L.	Alabama, Alaska, Albania, Alberta, Algeria, Altay, Amur, Angola, Argentina Northeast, Argentina Northwest, Argentina South, Arizona, Arkansas, Assam, Austria, Azores, Baleares, Baltic States, Bangladesh, Belarus, Belgium, Benin, Bermuda, Bolivia, Borneo, Botswana, Brazil South, British Columbia, Bulgaria, Burkina, Burundi, Buryatiya, California, Cambodia, Cameroon, Canary Is., Caprivi Strip, Cent…	Sp. Pl.: 992 (1753)	0	L.	0	Linné, Carl von;Linnaeus, Carl
Ceratopteris thalictroides	Acrostichum thalictroides	1753	1821	(L.) Brongn.	Andaman Is., Angola, Assam, Bangladesh, Bismarck Archipelago, Brazil Southeast, Brazil West-Central, California, Cambodia, Caroline Is., Chad, China North-Central, China South-Central, China Southeast, Colombia, Costa Rica, East Himalaya, Ecuador, El Salvador, Ethiopia, Florida, French Guiana, Guatemala, Guyana, Hainan, Honduras, India, Jamaica, Japan, Kenya, Korea, Laos, Lesser Sunda Is., Louisi…	Bull. Sci. Soc. Philom. Paris 8: 186 (1821)	0	L.	0	Linné, Carl von;Linnaeus, Carl
Cerbera manghas		1753	1753	L.	Andaman Is., Bangladesh, Bismarck Archipelago, Borneo, Cambodia, Caroline Is., China Southeast, Christmas I., Comoros, Fiji, Gilbert Is., Hainan, India, Jawa, Laos, Lesser Sunda Is., Madagascar, Malaya, Maluku, Marquesas, Marshall Is., Mauritius, Myanmar, Nansei-shoto, Nauru, New Caledonia, New Guinea, Nicobar Is., Northern Territory, Philippines, Pitcairn Is., Queensland, Samoa, Santa Cruz Is., …	Sp. Pl.: 208 (1753)	0	L.	0	Linné, Carl von;Linnaeus, Carl
Chaiturus marrubiastrum	Leonurus marrubiastrum	1753	1831	(L.) Ehrh. ex Rchb.	Altay, Austria, Belarus, Bulgaria, Central European Rus, Czechoslovakia, East European Russia, Germany, Greece, Italy, Kazakhstan, Kirgizstan, Krym, North Caucasus, Poland, Romania, South European Russi, Spain, Transcaucasus, Turkey, Ukraine, Uzbekistan, West Siberia, Xinjiang, Yugoslavia	Fl. Germ. Excurs.: 317 (1831)	0	L.	0	Linné, Carl von;Linnaeus, Carl
Chamaecrista absus	Cassia absus	1753	1982	(L.) H.S.Irwin & Barneby	Angola, Arizona, Aruba, Assam, Bangladesh, Benin, Bolivia, Botswana, Brazil North, Brazil Northeast, Brazil West-Central, Burkina, Burundi, Cameroon, Cape Verde, Central African Repu, Chad, Colombia, Congo, East Himalaya, Ecuador, Eritrea, Ethiopia, Gabon, Gambia, Ghana, Guatemala, Guinea, Guinea-Bissau, Hainan, India, Iran, Ivory Coast, Jamaica, Kenya, Malawi, Mali, Mauritania, Mexico Gulf, Mexi…	Mem. New York Bot. Gard. 35: 664 (1982)	0	L.	0	Linné, Carl von;Linnaeus, Carl
Chamaedaphne calyculata	Andromeda calyculata	1753	1794	(L.) Moench	Alaska, Alberta, Altay, Amur, Baltic States, Belarus, British Columbia, Buryatiya, Central European Rus, Chita, Connecticut, Delaware, East European Russia, Finland, Georgia, Illinois, Indiana, Inner Mongolia, Iowa, Irkutsk, Japan, Kamchatka, Khabarovsk, Korea, Krasnoyarsk, Labrador, Magadan, Maine, Manchuria, Manitoba, Maryland, Masachusettes, Michigan, Minnesota, Mongolia, New Brunswick, New Ha…	Methodus: 457 (1794)	0	L.	0	Linné, Carl von;Linnaeus, Carl
Chenopodiastrum hybridum	Chenopodium hybridum	1753	2012	(L.) S.Fuentes, Uotila & Borsch	Albania, Altay, Amur, Austria, Baltic States, Belarus, Belgium, Bulgaria, Buryatiya, Central European Rus, China North-Central, China South-Central, Chita, Czechoslovakia, Denmark, East European Russia, France, Germany, Greece, Hungary, Inner Mongolia, Irkutsk, Italy, Japan, Kazakhstan, Khabarovsk, Kirgizstan, Korea, Krasnoyarsk, Krym, Kuril Is., Manchuria, Mongolia, Netherlands, North Caucasus, …	Willdenowia 42: 14 (2012)	0	L.	0	Linné, Carl von;Linnaeus, Carl
Chenopodium album		1753	1753	L.	Afghanistan, Albania, Algeria, Altay, Amur, Assam, Austria, Azores, Baleares, Baltic States, Bangladesh, Belarus, Belgium, Bulgaria, Buryatiya, Canary Is., Cape Verde, Central European Rus, China North-Central, China South-Central, China Southeast, Chita, Corse, Cyprus, Czechoslovakia, Denmark, Djibouti, East Aegean Is., East European Russia, East Himalaya, Egypt, Ethiopia, Finland, France, Germa…	Sp. Pl.: 219 (1753)	0	L.	0	Linné, Carl von;Linnaeus, Carl
Cherleria biflora	Stellaria biflora	1753	2017	(L.) A.J.Moore & Dillenb.	Afghanistan, Alaska, Alberta, Aleutian Is., Altay, Austria, British Columbia, Buryatiya, Chita, East European Russia, Finland, Greenland, Iceland, Irkutsk, Italy, Kamchatka, Kazakhstan, Khabarovsk, Kirgizstan, Krasnoyarsk, Labrador, Magadan, Mongolia, North European Russi, Northwest Territorie, Norway, Nunavut, Pakistan, Québec, Sakhalin, Svalbard, Sweden, Switzerland, Tadzhikistan, Tuva, West Si…	Willdenowia 47: 9 (2017)	0	L.	0	Linné, Carl von;Linnaeus, Carl
Chimaphila umbellata	Pyrola umbellata	1753	1817	(L.) W.P.C.Barton	Alaska, Alberta, Altay, Arizona, Austria, Baltic States, Belarus, British Columbia, California, Central European Rus, Colorado, Connecticut, Czechoslovakia, Delaware, Denmark, District of Columbia, East European Russia, Finland, France, Germany, Guatemala, Hungary, Idaho, Illinois, Indiana, Inner Mongolia, Iowa, Irkutsk, Japan, Kazakhstan, Khabarovsk, Krasnoyarsk, Krym, Kuril Is., Maine, Manchuri…	Veg. Mater. Med. U.S. 1(1): 17 (1817)	0	L.	0	Linné, Carl von;Linnaeus, Carl
Chorispora sibirica	Raphanus sibiricus	1753	1821	(L.) DC.	Altay, Chita, Kazakhstan, Kirgizstan, Krasnoyarsk, Mongolia, Pakistan, Tibet, Tuva, West Himalaya, West Siberia, Xinjiang	Syst. Nat. 2: 437 (1821)	0	L.	0	Linné, Carl von;Linnaeus, Carl
Chrysanthemum arcticum		1753	1753	L.	Alaska, British Columbia, China North-Central, Japan, Kamchatka, Khabarovsk, Kuril Is., Magadan, North European Russi, Sakhalin	Sp. Pl.: 889 (1753)	0	L.	0	Linné, Carl von;Linnaeus, Carl
Chrysanthemum indicum		1753	1753	L.	China North-Central, China South-Central, China Southeast, East Himalaya, Japan, Korea, Laos, Manchuria, Nepal, Taiwan, Vietnam	Sp. Pl.: 889 (1753)	0	L.	0	Linné, Carl von;Linnaeus, Carl
Chrysojasminum humile	Jasminum humile	1753	2014	(L.) Banfi	Afghanistan, Assam, China North-Central, China South-Central, East Himalaya, Iran, Myanmar, Nepal, Pakistan, Tadzhikistan, Tibet, West Himalaya	Atti Soc. Ital. Sci. Nat. Mus. Civico Storia Nat. Milano 1(1): 5 (2014)	0	L.	0	Linné, Carl von;Linnaeus, Carl
Cibotium barometz	Polypodium barometz	1753	1842	(L.) J.Sm.	Assam, Cambodia, China South-Central, China Southeast, East Himalaya, Hainan, Jawa, Laos, Malaya, Myanmar, Nansei-shoto, New Guinea, Philippines, Sumatera, Taiwan, Thailand, Tibet, Vietnam	London J. Bot. 1: 437 (1842)	0	L.	0	Linné, Carl von;Linnaeus, Carl
Cicuta virosa		1753	1753	L.	Alaska, Alberta, Altay, Amur, Austria, Baltic States, Belarus, Belgium, British Columbia, Bulgaria, Buryatiya, Central European Rus, China North-Central, China South-Central, Chita, Czechoslovakia, Denmark, East European Russia, Finland, France, Germany, Great Britain, Greece, Hungary, Inner Mongolia, Ireland, Irkutsk, Italy, Japan, Kamchatka, Kazakhstan, Khabarovsk, Kirgizstan, Korea, Krasnoyars…	Sp. Pl.: 255 (1753)	0	L.	0	Linné, Carl von;Linnaeus, Carl
Cinnamomum camphora	Laurus camphora	1753	1825	(L.) J.Presl	Japan, Korea, Nansei-shoto, Taiwan	Prir. Rostlin 2: 36 (1825)	0	L.	0	Linné, Carl von;Linnaeus, Carl
Circaea alpina		1753	1753	L.	Alaska, Albania, Alberta, Aleutian Is., Altay, Amur, Arizona, Austria, Belgium, British Columbia, Buryatiya, Central European Rus, China North-Central, Chita, Colorado, Connecticut, Czechoslovakia, Denmark, East European Russia, Finland, France, Germany, Great Britain, Hungary, Idaho, Illinois, Indiana, Inner Mongolia, Irkutsk, Italy, Japan, Kamchatka, Kazakhstan, Kentucky, Khabarovsk, Korea, Kra…	Sp. Pl.: 9 (1753)	0	L.	0	Linné, Carl von;Linnaeus, Carl
Cirsium arvense	Serratula arvensis	1753	1771	(L.) Scop.	Afghanistan, Albania, Algeria, Altay, Amur, Austria, Azores, Baleares, Baltic States, Bangladesh, Belarus, Belgium, Bulgaria, Buryatiya, Central European Rus, China North-Central, China South-Central, China Southeast, Corse, Cyprus, Czechoslovakia, Denmark, East European Russia, Finland, France, Føroyar, Germany, Great Britain, Greece, Hungary, India, Inner Mongolia, Iran, Ireland, Italy, Kamchat…	Fl. Carniol., ed. 2, 2: 126 (1771)	0	L.	0	Linné, Carl von;Linnaeus, Carl
Cirsium helenioides	Carduus helenioides	1753	1768	(L.) Hill	Altay, East European Russia, Kazakhstan, Mongolia, North European Russi, Xinjiang	Hort. Kew.: 64 (1768)	0	L.	0	Linné, Carl von;Linnaeus, Carl
Cirsium serratuloides	Carduus serratuloides	1753	1768	(L.) Hill	Altay, Buryatiya, Chita, Irkutsk, Kazakhstan, Khabarovsk, Krasnoyarsk, Mongolia, Tuva, West Siberia, Xinjiang, Yakutskiya	Hort. Kew.: 64	0	L.	0	Linné, Carl von;Linnaeus, Carl
Cissampelos pareira		1753	1753	L.	Aldabra, Andaman Is., Argentina Northeast, Argentina Northwest, Aruba, Assam, Bahamas, Bangladesh, Belize, Bolivia, Borneo, Brazil North, Brazil Northeast, Brazil South, Brazil Southeast, Brazil West-Central, Cayman Is., China South-Central, China Southeast, Colombia, Comoros, Costa Rica, Cuba, Dominican Republic, East Himalaya, Ecuador, El Salvador, Ethiopia, Florida, French Guiana, Galápagos, G…	Sp. Pl.: 1031 (1753)	0	L.	0	Linné, Carl von;Linnaeus, Carl
Cladium mariscus	Schoenus mariscus	1753	1809	(L.) Pohl	Alabama, Albania, Algeria, Argentina Northeast, Argentina Northwest, Arizona, Arkansas, Austria, Bahamas, Baleares, Baltic States, Belarus, Belgium, Belize, Bermuda, Bolivia, Brazil Northeast, Brazil South, Brazil Southeast, Bulgaria, California, Cayman Is., Central European Rus, Chad, China South-Central, China Southeast, Colombia, Corse, Costa Rica, Cuba, Cyprus, Czechoslovakia, Denmark, Domini…	Tent. Fl. Bohem. 1: 32 (1809)	0	L.	0	Linné, Carl von;Linnaeus, Carl
Clematis integrifolia		1753	1753	L.	Albania, Altay, Austria, Bulgaria, Central European Rus, Czechoslovakia, Hungary, Kazakhstan, Krym, Lebanon-Syria, Myanmar, North Caucasus, Romania, South European Russi, Transcaucasus, Ukraine, Xinjiang, Yugoslavia; Extinct in: Italy	Sp. Pl.: 544 (1753)	0	L.	0	Linné, Carl von;Linnaeus, Carl
Clematis orientalis		1753	1753	L.	Afghanistan, Altay, Buryatiya, China North-Central, East Aegean Is., Iran, Iraq, Kazakhstan, Kirgizstan, Mongolia, Nepal, North Caucasus, Oman, Pakistan, South European Russi, Tadzhikistan, Transcaucasus, Turkey, Turkmenistan, Tuva, Ukraine, Uzbekistan, West Himalaya, Xinjiang	Sp. Pl.: 543 (1753)	0	L.	0	Linné, Carl von;Linnaeus, Carl
Clematis zeylanica	Atragene zeylanica	1753	1811	(L.) Poir.	Bangladesh, China South-Central, East Himalaya, India, Laos, Myanmar, Nepal, Sri Lanka, Thailand, Vietnam	J.B.A.M.de Lamarck, Encycl., Suppl. 2: 296 (1811)	0	L.	0	Linné, Carl von;Linnaeus, Carl
Cleome gynandra		1753	1753	L.	Angola, Assam, Bangladesh, Benin, Borneo, Botswana, Burkina, Burundi, Cambodia, Cameroon, Cape Provinces, Cape Verde, Central African Repu, Chad, China North-Central, China South-Central, China Southeast, Christmas I., Cocos (Keeling) Is., Congo, Djibouti, East Himalaya, Egypt, Eritrea, Ethiopia, Free State, Gabon, Ghana, Guinea, Guinea-Bissau, Gulf of Guinea Is., Gulf States, India, Ivory Coast,…	Sp. Pl.: 671 (1753)	0	L.	0	Linné, Carl von;Linnaeus, Carl
Cleome viscosa		1753	1753	L.	Afghanistan, Assam, Bangladesh, Benin, Borneo, Burkina, Cambodia, Cameroon, Cape Verde, Chad, China South-Central, China Southeast, Christmas I., East Himalaya, Egypt, Eritrea, Ethiopia, Gambia, Ghana, Guinea, Guinea-Bissau, Gulf States, Hainan, India, Iraq, Ivory Coast, Jawa, Laccadive Is., Laos, Lesser Sunda Is., Madagascar, Malaya, Maldives, Mali, Maluku, Mauritania, Myanmar, Nansei-shoto, Nep…	Sp. Pl.: 672 (1753)	0	L.	0	Linné, Carl von;Linnaeus, Carl
Clerodendrum indicum	Siphonanthus indicus	1753	1891	(L.) Kuntze	Assam, Bangladesh, Cambodia, China South-Central, China Southeast, East Himalaya, India, Laos, Malaya, Myanmar, Nepal, Sri Lanka, Sumatera, Thailand, Vietnam	Revis. Gen. Pl. 2: 586 (1891)	0	L.	0	Linné, Carl von;Linnaeus, Carl
Clitoria ternatea		1753	1753	L.	Angola, Benin, Burkina, Burundi, Cameroon, Cape Verde, Caprivi Strip, Central African Repu, China South-Central, China Southeast, Eritrea, Ethiopia, Gabon, Gambia, Ghana, Guinea, Guinea-Bissau, Gulf of Guinea Is., Hainan, Kenya, Malawi, Mauritania, Mozambique, Namibia, Nigeria, Northern Provinces, Saudi Arabia, Senegal, Sierra Leone, Somalia, Sudan, Taiwan, Tanzania, Togo, Uganda, Yemen, Zambia, …	Sp. Pl.: 753 (1753)	0	L.	0	Linné, Carl von;Linnaeus, Carl
Cocculus hirsutus	Menispermum hirsutum	1753	1860	(L.) W.Theob.	Angola, Bangladesh, Botswana, Caprivi Strip, China Southeast, Eritrea, Ethiopia, Gulf States, India, Kenya, KwaZulu-Natal, Malawi, Mozambique, Myanmar, Namibia, Northern Provinces, Pakistan, Saudi Arabia, Sri Lanka, Sudan, Swaziland, Tanzania, Thailand, West Himalaya, Yemen, Zambia, Zimbabwe	F.Mason, Burmah, ed. 3, 2: 657 (1860)	0	L.	0	Linné, Carl von;Linnaeus, Carl
Cocculus orbiculatus	Menispermum orbiculatum	1753	1817	(L.) DC.	Assam, China North-Central, China South-Central, China Southeast, Cook Is., East Himalaya, Hainan, Hawaii, Japan, Jawa, Korea, Laos, Lesser Sunda Is., Malaya, Nepal, Philippines, Pitcairn Is., Sumatera, Taiwan, Thailand, Tubuai Is., Vietnam	Syst. Nat. 1: 523 (1817)	0	L.	0	Linné, Carl von;Linnaeus, Carl
Coix lacryma-jobi		1753	1753	L.	Andaman Is., Assam, Bangladesh, Borneo, Cambodia, China South-Central, China Southeast, East Himalaya, Hainan, India, Laos, Malaya, Myanmar, Nepal, Nicobar Is., Philippines, Sri Lanka, Taiwan, Thailand, Tibet, Vietnam, West Himalaya	Sp. Pl.: 972 (1753)	0	L.	0	Linné, Carl von;Linnaeus, Carl
Coldenia procumbens		1753	1753	L.	Andaman Is., Angola, Assam, Bangladesh, Benin, Burkina, Cambodia, Cameroon, Cape Verde, Central African Repu, Chad, Djibouti, East Himalaya, Egypt, Ethiopia, Gambia, Ghana, Guinea, Guinea-Bissau, Hainan, India, Kenya, Laos, Madagascar, Malaya, Mali, Mauritania, Mozambique, Myanmar, Nepal, Niger, Nigeria, Northern Provinces, Northern Territory, Pakistan, Queensland, Senegal, Somalia, Sri Lanka, Su…	Sp. Pl.: 125 (1753)	0	L.	0	Linné, Carl von;Linnaeus, Carl
Colocasia esculenta	Arum esculentum	1753	1832	(L.) Schott	Assam, Bangladesh, China South-Central, China Southeast, East Himalaya, India, Laos, Malaya, Myanmar, Nepal, Sumatera, Taiwan, Thailand	H.W.Schott &amp; S.L.Endlicher, Melet. Bot.: 18 (1832)	0	L.	0	Linné, Carl von;Linnaeus, Carl
Colubrina asiatica	Colubrina asiatica	1753	1826	(L.) Brongn.	Aldabra, Andaman Is., Bangladesh, Bismarck Archipelago, Borneo, Cambodia, Caroline Is., China Southeast, Cook Is., Fiji, Hainan, Hawaii, India, Jawa, Kazan-retto, Kenya, Laccadive Is., Lesser Sunda Is., Madagascar, Malaya, Maldives, Maluku, Marianas, Marquesas, Marshall Is., Mozambique, Mozambique Channel I, Myanmar, Nansei-shoto, Nauru, New Caledonia, New Guinea, Nicobar Is., Niue, Philippines, …	Mém. Fam. Rhamn.: 62 (1826)	0	L.	0	Linné, Carl von;Linnaeus, Carl
Comarum palustre		1753	1753	L.	Alaska, Alberta, Altay, Amur, Austria, Baltic States, Belarus, Belgium, British Columbia, Bulgaria, Buryatiya, California, Central European Rus, China North-Central, Chita, Colorado, Connecticut, Czechoslovakia, Denmark, East European Russia, Finland, France, Føroyar, Germany, Great Britain, Greenland, Hungary, Iceland, Idaho, Illinois, Indiana, Inner Mongolia, Iowa, Ireland, Irkutsk, Italy, Japa…	Sp. Pl.: 502 (1753)	0	L.	0	Linné, Carl von;Linnaeus, Carl
Commelina benghalensis		1753	1753	L.	Andaman Is., Angola, Assam, Bangladesh, Benin, Botswana, Burkina, Burundi, Cameroon, Cape Provinces, Cape Verde, Central African Repu, Chad, China North-Central, China South-Central, China Southeast, Congo, Djibouti, East Himalaya, Equatorial Guinea, Eritrea, Ethiopia, Free State, Gambia, Ghana, Guinea, Guinea-Bissau, Gulf of Guinea Is., Hainan, India, Ivory Coast, Japan, Jawa, Kazan-retto, Kenya…	Sp. Pl.: 41 (1753)	0	L.	0	Linné, Carl von;Linnaeus, Carl
Commelina communis		1753	1753	L.	Altay, Amur, Buryatiya, Cambodia, Central European Rus, China North-Central, China South-Central, China Southeast, Chita, Hainan, Inner Mongolia, Irkutsk, Japan, Kamchatka, Khabarovsk, Korea, Kuril Is., Laos, Manchuria, Myanmar, Nansei-shoto, North Caucasus, Primorye, Sakhalin, Taiwan, Thailand, Transcaucasus, Ukraine, Vietnam	Sp. Pl.: 40 (1753)	0	L.	0	Linné, Carl von;Linnaeus, Carl
Commicarpus chinensis	Valeriana chinensis	1753	1934	(L.) Heimerl	Assam, Cambodia, China Southeast, Christmas I., Hainan, India, Jawa, Lesser Sunda Is., Malaya, Maluku, Myanmar, Pakistan, South China Sea, Sri Lanka, Thailand, Vietnam, West Himalaya	H.G.A.Engler, Nat. Pflanzenfam. ed. 2, 16c: 117 (1934)	0	L.	0	Linné, Carl von;Linnaeus, Carl
Conioselinum chinense	Athamanta chinensis	1753	1888	(L.) Britton, Sterns & Poggenb.	Alabama, Alaska, Aleutian Is., British Columbia, California, China Southeast, Connecticut, Illinois, Indiana, Iowa, Japan, Kamchatka, Khabarovsk, Kuril Is., Labrador, Louisiana, Maine, Masachusettes, Michigan, Minnesota, Missouri, Nebraska, New Brunswick, New Hampshire, New Jersey, New York, Newfoundland, North Carolina, Northwest Territorie, Ohio, Ontario, Oregon, Pennsylvania, Primorye, Québec,…	Prelim. Cat.: 22 (1888)	0	L.	0	Linné, Carl von;Linnaeus, Carl
Conium maculatum		1753	1753	L.	Afghanistan, Albania, Algeria, Austria, Baleares, Baltic States, Belarus, Belgium, Bulgaria, Central European Rus, Corse, Cyprus, Czechoslovakia, Denmark, East Aegean Is., East European Russia, Ethiopia, Finland, France, Germany, Great Britain, Greece, Hungary, Iran, Iraq, Ireland, Italy, Kazakhstan, Kirgizstan, Kriti, Krym, Lebanon-Syria, Libya, Morocco, Netherlands, North Caucasus, North Europe…	Sp. Pl.: 243 (1753)	0	L.	0	Linné, Carl von;Linnaeus, Carl
Convolvulus arvensis		1753	1753	L.	Afghanistan, Albania, Algeria, Altay, Amur, Austria, Azores, Baleares, Baltic States, Belarus, Belgium, Bulgaria, Buryatiya, Canary Is., Central European Rus, Chad, China North-Central, China South-Central, China Southeast, Chita, Corse, Cyprus, Czechoslovakia, Denmark, East Aegean Is., East European Russia, East Himalaya, Egypt, Finland, France, Germany, Great Britain, Greece, Hainan, Hungary, I…	Sp. Pl.: 153 (1753)	0	L.	0	Linné, Carl von;Linnaeus, Carl
Corchorus capsularis		1753	1753	L.	Bangladesh, China North-Central, China South-Central, China Southeast, East Himalaya, India, Laccadive Is., Laos, Maldives, Myanmar, Nepal, Pakistan, Sri Lanka, Taiwan, Thailand	Sp. Pl.: 529 (1753)	0	L.	0	Linné, Carl von;Linnaeus, Carl
Corchorus olitorius		1753	1753	L.	Afghanistan, Andaman Is., Angola, Assam, Bangladesh, Botswana, Burundi, Cameroon, Cape Verde, Central African Repu, China South-Central, China Southeast, Congo, Djibouti, Eritrea, Ethiopia, Gambia, Ghana, Guinea, Guinea-Bissau, Gulf of Guinea Is., Gulf States, Hainan, India, Iran, Ivory Coast, Kenya, KwaZulu-Natal, Laos, Lebanon-Syria, Lesser Sunda Is., Liberia, Malawi, Malaya, Mali, Mozambique, …	Sp. Pl.: 529 (1753)	0	L.	0	Linné, Carl von;Linnaeus, Carl
Corydalis capnoides	Fumaria capnoides	1753	1806	(L.) Pers.	Altay, Austria, Buryatiya, Chita, Czechoslovakia, East European Russia, Irkutsk, Italy, Kazakhstan, Kirgizstan, Krasnoyarsk, Mongolia, North European Russi, Poland, Romania, Tadzhikistan, Tuva, West Siberia, Xinjiang, Yakutskiya	Syn. Pl. 2: 270 (1806)	0	L.	0	Linné, Carl von;Linnaeus, Carl
Cotula anthemoides		1753	1753	L.	Algeria, Angola, Botswana, Cambodia, Cape Provinces, Chad, China South-Central, China Southeast, East Himalaya, Egypt, Eritrea, Ethiopia, Free State, India, Kenya, KwaZulu-Natal, Laos, Lesotho, Mauritania, Morocco, Mozambique, Myanmar, Namibia, Nepal, Northern Provinces, Pakistan, Palestine, Saudi Arabia, Senegal, Sinai, St.Helena, Sudan, Sumatera, Swaziland, Taiwan, Tanzania, Thailand, Vietnam, …	Sp. Pl.: 891 (1753)	0	L.	0	Linné, Carl von;Linnaeus, Carl
Crassula aquatica	Tillaea aquatica	1753	1891	(L.) Schönland	Alaska, Amur, Austria, British Columbia, Buryatiya, California, Central European Rus, China South-Central, Costa Rica, Czechoslovakia, Denmark, El Salvador, Finland, Great Britain, Iceland, Inner Mongolia, Japan, Khabarovsk, Korea, Manchuria, Mexico Gulf, Mexico Northeast, Mexico Northwest, Mexico Southwest, Mongolia, New Jersey, New York, Newfoundland, North European Russi, Northwest European R,…	H.G.A.Engler &amp; K.A.E.Prantl, Nat. Pflanzenfam. 3(2): 37 (1891)	0	L.	0	Linné, Carl von;Linnaeus, Carl
Crepis lyrata	Hieracium lyratum	1753	1838	(L.) Froel.	Altay, Buryatiya, Irkutsk, Kazakhstan, Krasnoyarsk, Mongolia, Tuva, West Siberia, Xinjiang	Prodr. 7(1): 170 (1838)	0	L.	0	Linné, Carl von;Linnaeus, Carl
Crepis sibirica		1753	1753	L.	Altay, Buryatiya, Central European Rus, Chita, Czechoslovakia, East European Russia, Inner Mongolia, Irkutsk, Kazakhstan, Kirgizstan, Krasnoyarsk, Manchuria, Mongolia, North Caucasus, North European Russi, Northwest European R, Poland, Romania, South European Russi, Tadzhikistan, Transcaucasus, Tuva, Ukraine, Uzbekistan, West Siberia, Xinjiang, Yakutskiya	Sp. Pl.: 807 (1753)	0	L.	0	Linné, Carl von;Linnaeus, Carl
Crepis tectorum		1753	1753	L.	Altay, Amur, Austria, Baltic States, Belarus, Belgium, Bulgaria, Buryatiya, Central European Rus, Chita, Czechoslovakia, Denmark, East European Russia, Finland, France, Germany, Great Britain, Hungary, Inner Mongolia, Ireland, Irkutsk, Italy, Kamchatka, Kazakhstan, Khabarovsk, Krasnoyarsk, Krym, Magadan, Manchuria, Mongolia, Netherlands, North Caucasus, North European Russi, Northwest European R,…	Sp. Pl.: 807 (1753)	0	L.	0	Linné, Carl von;Linnaeus, Carl
Crinum asiaticum		1753	1753	L.	Andaman Is., Assam, Bangladesh, Bismarck Archipelago, Borneo, Cambodia, China Southeast, Christmas I., Cocos (Keeling) Is., Fiji, India, Japan, Jawa, Korea, Laos, Lesser Sunda Is., Malaya, Maldives, Maluku, Mauritius, Myanmar, Nansei-shoto, New Caledonia, New Guinea, New South Wales, Nicobar Is., Norfolk Is., Northern Territory, Ogasawara-shoto, Philippines, Queensland, Rodrigues, Réunion, Samoa,…	Sp. Pl.: 292 (1753)	0	L.	0	Linné, Carl von;Linnaeus, Carl
Crinum latifolium		1753	1753	L.	Andaman Is., Assam, Bangladesh, China South-Central, China Southeast, India, Laos, Myanmar, Nicobar Is., Sri Lanka, Thailand, Vietnam	Sp. Pl.: 291 (1753)	0	L.	0	Linné, Carl von;Linnaeus, Carl
Crossostephium chinense	Artemisia chinensis	1753	1906	(L.) Makino	Cambodia, China South-Central, China Southeast, Japan, Jawa, Kazan-retto, Laos, Nansei-shoto, Philippines, Taiwan, Vietnam	Bot. Mag. (Tokyo) 20: 33 (1906)	0	L.	0	Linné, Carl von;Linnaeus, Carl
Crotalaria retusa		1753	1753	L.	Assam, Bangladesh, Bismarck Archipelago, Borneo, Cambodia, China Southeast, East Himalaya, Galápagos, Hainan, India, Iran, Jawa, Laccadive Is., Laos, Lesser Sunda Is., Madagascar, Malaya, Maluku, Mauritius, Myanmar, Nepal, New Guinea, Nicaragua, Northern Territory, Oman, Panamá, Philippines, Rodrigues, Réunion, Saudi Arabia, Sri Lanka, Sumatera, Taiwan, Thailand, Vietnam, West Himalaya, Western A…	Sp. Pl.: 715 (1753)	0	L.	0	Linné, Carl von;Linnaeus, Carl
Crotalaria verrucosa		1753	1753	L.	Assam, Bangladesh, Bismarck Archipelago, Borneo, Cambodia, China Southeast, East Himalaya, Hainan, India, Jawa, Laccadive Is., Laos, Lesser Sunda Is., Malaya, Maluku, Myanmar, New Guinea, Nicaragua, Northern Territory, Panamá, Philippines, Queensland, Sri Lanka, Sulawesi, Sumatera, Taiwan, Thailand, Vietnam, West Himalaya, Western Australia	Sp. Pl.: 715 (1753)	0	L.	0	Linné, Carl von;Linnaeus, Carl
Croton tiglium		1753	1753	L.	Assam, Bangladesh, Borneo, Cambodia, China South-Central, China Southeast, East Himalaya, Hainan, India, Jawa, Lesser Sunda Is., Malaya, Maldives, Maluku, Myanmar, Nepal, Philippines, Sri Lanka, Sulawesi, Sumatera, Taiwan, Thailand, Vietnam	Sp. Pl.: 1004 (1753)	0	L.	0	Linné, Carl von;Linnaeus, Carl
Cucumis sativus		1753	1753	L.	Assam, Bangladesh, China South-Central, China Southeast, East Himalaya, Myanmar, Nepal, Thailand, Turkmenistan, West Himalaya	Sp. Pl.: 1012 (1753)	0	L.	0	Linné, Carl von;Linnaeus, Carl
Cullen corylifolium	Psoralea corylifolia	1753	1787	(L.) Medik.	Assam, Bangladesh, China South-Central, Djibouti, India, Iraq, Jawa, Laos, Malaya, Myanmar, Oman, Pakistan, Somalia, Sri Lanka, Vietnam, West Himalaya, Yemen; Extinct in: Socotra	Vorles. Churpfälz. Phys.-Ökon. Ges. 2: 381 (1787)	0	L.	0	Linné, Carl von;Linnaeus, Carl
Cuscuta epithymum	Cuscuta europaea var. epithymum	1753	1759	(L.) L.	Afghanistan, Albania, Algeria, Altay, Austria, Baleares, Baltic States, Belarus, Belgium, Bulgaria, Canary Is., Central European Rus, Corse, Czechoslovakia, Denmark, East Aegean Is., East European Russia, Finland, France, Germany, Great Britain, Greece, Hungary, Iran, Ireland, Italy, Kazakhstan, Kriti, Krym, Lebanon-Syria, Libya, Madeira, Morocco, Netherlands, New Mexico, North Caucasus, North Eu…	Amoen. Acad. 4: 478 (1759)	0	L.	0	Linné, Carl von;Linnaeus, Carl
Cuscuta europaea		1753	1753	L.	Afghanistan, Albania, Altay, Amur, Austria, Baltic States, Belarus, Belgium, Bulgaria, Buryatiya, Central European Rus, China North-Central, China South-Central, Chita, Corse, Denmark, East Aegean Is., East European Russia, East Himalaya, Finland, France, Germany, Great Britain, Greece, Hungary, India, Inner Mongolia, Iran, Iraq, Irkutsk, Italy, Japan, Kazakhstan, Khabarovsk, Kirgizstan, Krasnoya…	Sp. Pl.: 124 (1753)	0	L.	0	Linné, Carl von;Linnaeus, Carl
Cyanotis axillaris	Commelina axillaris	1753	1826	(L.) D.Don ex Sweet	Assam, Bangladesh, Cambodia, China Southeast, East Himalaya, Hainan, India, Jawa, Laos, Malaya, Myanmar, Nepal, Northern Territory, Philippines, Queensland, Sri Lanka, Taiwan, Thailand, Vietnam, Western Australia	Hort. Brit.: 430 (1826)	0	L.	0	Linné, Carl von;Linnaeus, Carl
Cyanotis cristata	Commelina cristata	1753	1825	(L.) D.Don	Assam, Bangladesh, Cambodia, China South-Central, China Southeast, East Himalaya, Ethiopia, Hainan, India, Jawa, Laccadive Is., Laos, Malaya, Maldives, Mauritius, Myanmar, Nepal, Pakistan, Philippines, Socotra, Sri Lanka, Thailand, Vietnam, West Himalaya	Prodr. Fl. Nepal.: 46 (1825)	0	L.	0	Linné, Carl von;Linnaeus, Carl
Cyanthillium cinereum	Conyza cinerea	1753	1990	(L.) H.Rob.	Andaman Is., Angola, Bangladesh, Benin, Burkina, Burundi, Cameroon, Cape Verde, Caroline Is., Central African Repu, Chad, China South-Central, China Southeast, Christmas I., Comoros, Congo, East Himalaya, Eritrea, Ethiopia, Gabon, Guinea-Bissau, Gulf States, India, Ivory Coast, Japan, Jawa, Kazan-retto, Kenya, KwaZulu-Natal, Laccadive Is., Laos, Madagascar, Malaya, Maldives, Mali, Marianas, Marsh…	Proc. Biol. Soc. Washington 103: 252 (1990)	0	L.	0	Linné, Carl von;Linnaeus, Carl
Cymbaria daurica		1753	1753	L.	Altay, Buryatiya, China North-Central, Chita, Inner Mongolia, Irkutsk, Kazakhstan, Krasnoyarsk, Manchuria, Mongolia, Tuva	Sp. Pl.: 618 (1753)	0	L.	0	Linné, Carl von;Linnaeus, Carl
Cymbidium aloifolium	Epidendrum aloifolium	1753	1799	(L.) Sw.	Andaman Is., Assam, Bangladesh, Cambodia, China South-Central, China Southeast, East Himalaya, India, Jawa, Laos, Malaya, Myanmar, Nepal, Sri Lanka, Sumatera, Thailand, Vietnam, West Himalaya	Nova Acta Regiae Soc. Sci. Upsal. 6: 73 (1799)	0	L.	0	Linné, Carl von;Linnaeus, Carl
Cymbidium ensifolium	Epidendrum ensifolium	1753	1799	(L.) Sw.	Assam, Cambodia, China South-Central, China Southeast, Hainan, Japan, Korea, Laos, Myanmar, Philippines, Taiwan, Thailand, Tibet, Vietnam	Nova Acta Regiae Soc. Sci. Upsal. 6: 77 (1799)	0	L.	0	Linné, Carl von;Linnaeus, Carl
Cynanchum acutum		1753	1753	L.	Afghanistan, Albania, Algeria, Altay, Baleares, Bulgaria, Canary Is., China North-Central, Cyprus, East Aegean Is., Egypt, France, Greece, Inner Mongolia, Iran, Iraq, Italy, Kazakhstan, Kirgizstan, Kriti, Krym, Lebanon-Syria, Libya, Mongolia, Morocco, North Caucasus, Pakistan, Palestine, Portugal, Romania, Saudi Arabia, Sicilia, South European Russi, Spain, Tadzhikistan, Tibet, Transcaucasus, Tun…	Sp. Pl.: 212 (1753)	0	L.	0	Linné, Carl von;Linnaeus, Carl
Cynodon dactylon	Panicum dactylon	1753	1805	(L.) Pers.	Afghanistan, Albania, Aldabra, Algeria, Andaman Is., Angola, Assam, Austria, Azores, Baleares, Bangladesh, Benin, Bismarck Archipelago, Borneo, Botswana, Bulgaria, Burkina, Burundi, Cambodia, Cameroon, Canary Is., Cape Provinces, Cape Verde, Caprivi Strip, Central African Repu, Central European Rus, Chad, China North-Central, China South-Central, China Southeast, Congo, Corse, Cyprus, Czechoslova…	Syn. Pl. 1: 85 (1805)	0	L.	0	Linné, Carl von;Linnaeus, Carl
Cynomorium coccineum		1753	1753	L.	Afghanistan, Algeria, Altay, Baleares, Canary Is., China North-Central, Corse, Egypt, Gulf States, Inner Mongolia, Iran, Iraq, Italy, Kazakhstan, Kirgizstan, Lebanon-Syria, Libya, Mauritania, Mongolia, Morocco, Palestine, Portugal, Qinghai, Sardegna, Saudi Arabia, Sicilia, Sinai, Somalia, Spain, Tadzhikistan, Tunisia, Turkmenistan, Uzbekistan, Western Sahara, Xinjiang	Sp. Pl.: 970 (1753)	0	L.	0	Linné, Carl von;Linnaeus, Carl
Cyperus compressus		1753	1753	L.	Afghanistan, Alabama, Andaman Is., Angola, Arkansas, Assam, Bahamas, Bangladesh, Belize, Benin, Bolivia, Borneo, Botswana, Brazil North, Brazil Northeast, Brazil West-Central, Burkina, Cameroon, Cape Verde, Caroline Is., Cayman Is., Central African Repu, China North-Central, China South-Central, China Southeast, Colombia, Comoros, Costa Rica, Cuba, Delaware, Dominican Republic, East Himalaya, Ecu…	Sp. Pl.: 46 (1753)	0	L.	0	Linné, Carl von;Linnaeus, Carl
Cyperus fuscus		1753	1753	L.	Afghanistan, Albania, Algeria, Altay, Assam, Austria, Baltic States, Belarus, Belgium, Bulgaria, Canary Is., Central European Rus, China North-Central, China South-Central, China Southeast, Corse, Cyprus, Czechoslovakia, Denmark, East Aegean Is., East European Russia, Egypt, France, Germany, Great Britain, Greece, Hungary, India, Inner Mongolia, Iran, Iraq, Italy, Kazakhstan, Kirgizstan, Kriti, K…	Sp. Pl.: 46 (1753)	0	L.	0	Linné, Carl von;Linnaeus, Carl
Cyperus haspan		1753	1753	L.	Alabama, Andaman Is., Angola, Assam, Bangladesh, Belize, Benin, Bismarck Archipelago, Bolivia, Borneo, Brazil North, Brazil Northeast, Brazil South, Brazil Southeast, Brazil West-Central, Burkina, Burundi, Cambodia, Cameroon, Caroline Is., Central African Repu, Chad, China South-Central, China Southeast, Colombia, Comoros, Congo, Costa Rica, Cuba, Dominican Republic, East Himalaya, Ecuador, Equat…	Sp. Pl.: 45 (1753)	0	L.	0	Linné, Carl von;Linnaeus, Carl
Cyperus iria		1753	1753	L.	Afghanistan, Assam, Bangladesh, Benin, Borneo, Botswana, Burkina, Caroline Is., Chad, China North-Central, China South-Central, China Southeast, East Himalaya, Eritrea, Ethiopia, Gabon, Gambia, Ghana, Hainan, India, Iran, Iraq, Ivory Coast, Japan, Jawa, Kazan-retto, Kenya, Korea, Laos, Lesser Sunda Is., Madagascar, Malaya, Mali, Maluku, Manchuria, Marianas, Mauritania, Myanmar, Namibia, Nansei-sh…	Sp. Pl.: 45 (1753)	0	L.	0	Linné, Carl von;Linnaeus, Carl
Cyperus michelianus	Scirpus michelianus	1753	1813	(L.) Delile	Afghanistan, Algeria, Altay, Amur, Assam, Austria, Bangladesh, Belarus, Bulgaria, Central European Rus, Chad, China North-Central, China South-Central, China Southeast, Congo, Corse, Czechoslovakia, East Himalaya, Egypt, Ethiopia, France, Gabon, Germany, Ghana, Greece, Hainan, Hungary, India, Inner Mongolia, Iraq, Italy, Japan, Jawa, Kazakhstan, Kenya, Korea, Kriti, Krym, Laos, Lebanon-Syria, Mad…	Descr. Egypte, Hist. Nat. 3: 50 (1813)	0	L.	0	Linné, Carl von;Linnaeus, Carl
Cyperus odoratus		1753	1753	L.	Alabama, Andaman Is., Angola, Argentina Northeast, Argentina Northwest, Arizona, Arkansas, Aruba, Bahamas, Bangladesh, Belize, Benin, Bermuda, Bolivia, Borneo, Brazil North, Brazil Northeast, Brazil South, Brazil Southeast, Brazil West-Central, California, Caroline Is., Cayman Is., Central American Pac, Chile Central, China Southeast, Christmas I., Cocos (Keeling) Is., Colombia, Congo, Connecticu…	Sp. Pl.: 46 (1753)	0	L.	0	Linné, Carl von;Linnaeus, Carl
Cyperus rotundus		1753	1753	L.	Afghanistan, Albania, Aldabra, Algeria, Andaman Is., Angola, Assam, Austria, Azores, Baleares, Bangladesh, Benin, Borneo, Botswana, Bulgaria, Burkina, Burundi, Cambodia, Cameroon, Canary Is., Cape Provinces, Cape Verde, Caprivi Strip, Caroline Is., Central African Repu, Chad, Chagos Archipelago, China North-Central, China South-Central, China Southeast, Comoros, Congo, Corse, Cyprus, Djibouti, Ea…	Sp. Pl.: 45 (1753)	0	L.	0	Linné, Carl von;Linnaeus, Carl
Cypripedium calceolus		1753	1753	L.	Altay, Amur, Austria, Baltic States, Belarus, Bulgaria, Buryatiya, Central European Rus, Chita, Czechoslovakia, Denmark, East European Russia, Finland, France, Germany, Great Britain, Hungary, Inner Mongolia, Irkutsk, Italy, Japan, Khabarovsk, Korea, Krasnoyarsk, Krym, Manchuria, Mongolia, North European Russi, Northwest European R, Norway, Poland, Primorye, Romania, Sakhalin, South European Russ…	Sp. Pl.: 951 (1753)	0	L.	0	Linné, Carl von;Linnaeus, Carl
Cyrtococcum patens	Panicum patens	1753	1921	(L.) A.Camus	Andaman Is., Assam, Bangladesh, Borneo, Caroline Is., China South-Central, China Southeast, East Himalaya, Hainan, India, Jawa, Laos, Lesser Sunda Is., Malaya, Maluku, Marianas, Myanmar, Nansei-shoto, Nepal, New Caledonia, New Guinea, Nicobar Is., Ogasawara-shoto, Philippines, Samoa, Solomon Is., Sri Lanka, Sulawesi, Sumatera, Taiwan, Thailand, Tibet, Vietnam, West Himalaya	Bull. Mus. Natl. Hist. Nat. 27: 118 (1921)	0	L.	0	Linné, Carl von;Linnaeus, Carl
Cystopteris fragilis	Polypodium fragile	1753	1805	(L.) Bernh.	Afghanistan, Alaska, Albania, Alberta, Algeria, Altay, Amur, Argentina Northeast, Argentina Northwest, Argentina South, Arizona, Austria, Baleares, Baltic States, Belarus, Belgium, Bolivia, Brazil South, British Columbia, Bulgaria, Buryatiya, California, Cameroon, Cape Provinces, Cape Verde, Central European Rus, Chad, Chile Central, Chile South, China North-Central, China South-Central, China So…	Neues J. Bot. 1(2): 26 (1805)	0	L.	0	Linné, Carl von;Linnaeus, Carl
Dactylis glomerata		1753	1753	L.	Afghanistan, Albania, Algeria, Altay, Austria, Azores, Baleares, Baltic States, Belarus, Belgium, Bulgaria, Buryatiya, Canary Is., Central European Rus, China North-Central, China South-Central, China Southeast, Corse, Cyprus, Czechoslovakia, Denmark, East Aegean Is., East European Russia, East Himalaya, Egypt, Finland, France, Føroyar, Germany, Great Britain, Greece, Hungary, Iceland, India, Inn…	Sp. Pl.: 71 (1753)	0	L.	0	Linné, Carl von;Linnaeus, Carl
Dactyloctenium aegyptium	Cynosurus aegyptius	1753	1809	(L.) Willd.	Afghanistan, Algeria, Angola, Assam, Bangladesh, Benin, Borneo, Botswana, Burkina, Burundi, Cambodia, Cameroon, Cape Provinces, Central African Repu, Chad, China South-Central, China Southeast, Congo, Djibouti, East Aegean Is., East Himalaya, Egypt, Eritrea, Ethiopia, Free State, Gabon, Gambia, Ghana, Guinea, Guinea-Bissau, Gulf of Guinea Is., Gulf States, Hainan, India, Iran, Iraq, Ivory Coast, …	Enum. Pl.: 1029 (1809)	0	L.	0	Linné, Carl von;Linnaeus, Carl
Dactylorhiza viridis	Satyrium viride	1753	1997	(L.) R.M.Bateman, Pridgeon & M.W.Chase	Alaska, Albania, Alberta, Aleutian Is., Altay, Amur, Austria, Baltic States, Belarus, Belgium, British Columbia, Bulgaria, Buryatiya, Central European Rus, China North-Central, China South-Central, China Southeast, Chita, Colorado, Connecticut, Corse, Czechoslovakia, Denmark, East European Russia, East Himalaya, Finland, France, Føroyar, Germany, Great Britain, Greece, Iceland, Idaho, Illinois, I…	Lindleyana 12: 129 (1997)	0	L.	0	Linné, Carl von;Linnaeus, Carl
Dasiphora fruticosa	Potentilla fruticosa	1753	1898	(L.) Rydb.	Alaska, Alberta, Altay, Amur, Arizona, Baltic States, British Columbia, Bulgaria, Buryatiya, California, China North-Central, China South-Central, Chita, Colorado, Connecticut, East European Russia, East Himalaya, France, Great Britain, Idaho, Illinois, Indiana, Iowa, Ireland, Irkutsk, Italy, Japan, Kamchatka, Kazakhstan, Khabarovsk, Korea, Krasnoyarsk, Labrador, Magadan, Maine, Manchuria, Manito…	Monogr. N. Amer. Potent. 2: 188 (1898)	0	L.	0	Linné, Carl von;Linnaeus, Carl
Daucus carota		1753	1753	L.	Afghanistan, Albania, Algeria, Austria, Azores, Baleares, Baltic States, Belarus, Belgium, Bulgaria, Canary Is., Central European Rus, China South-Central, China Southeast, Corse, Cyprus, Czechoslovakia, Denmark, East Aegean Is., East European Russia, France, Germany, Great Britain, Greece, Hungary, Iran, Iraq, Ireland, Italy, Kazakhstan, Kirgizstan, Kriti, Krym, Lebanon-Syria, Madeira, Morocco, …	Sp. Pl.: 242 (1753)	0	L.	0	Linné, Carl von;Linnaeus, Carl
Delphinium ajacis		1753	1753	L.	Afghanistan, Albania, Bulgaria, Corse, East Aegean Is., East Himalaya, France, Greece, Iran, Italy, Kriti, Lebanon-Syria, North Caucasus, Pakistan, Saudi Arabia, Sicilia, Tibet, Transcaucasus, Turkey, Turkey-in-Europe, Turkmenistan, Vietnam, West Himalaya, Yugoslavia	Sp. Pl.: 531 (1753)	0	L.	0	Linné, Carl von;Linnaeus, Carl
Delphinium grandiflorum		1753	1753	L.	Amur, Buryatiya, China North-Central, China South-Central, China Southeast, Chita, Inner Mongolia, Irkutsk, Kazakhstan, Khabarovsk, Korea, Krasnoyarsk, Manchuria, Mongolia, Qinghai, Tibet, Tuva, Yakutskiya	Sp. Pl.: 531 (1753)	0	L.	0	Linné, Carl von;Linnaeus, Carl
Dendrobium moniliforme	Epidendrum moniliforme	1753	1799	(L.) Sw.	Assam, China North-Central, China South-Central, China Southeast, East Himalaya, Japan, Korea, Myanmar, Nepal, Taiwan, Vietnam, West Himalaya	Nova Acta Regiae Soc. Sci. Upsal. 6: 85 (1799)	0	L.	0	Linné, Carl von;Linnaeus, Carl
Dendrolobium umbellatum	Hedysarum umbellatum	1753	1852	(L.) Benth.	Andaman Is., Bangladesh, Bismarck Archipelago, Borneo, Cambodia, Caroline Is., China Southeast, Fiji, India, Jawa, Kenya, Lesser Sunda Is., Madagascar, Malaya, Maldives, Maluku, Mauritius, Myanmar, Nansei-shoto, New Caledonia, New Guinea, Nicobar Is., Niue, Philippines, Queensland, Réunion, Samoa, Seychelles, Sri Lanka, Sulawesi, Sumatera, Taiwan, Tanzania, Thailand, Tonga, Vanuatu, Vietnam, Wall…	F.A.W.Miquel, Pl. Jungh.: 218 (1852)	0	L.	0	Linné, Carl von;Linnaeus, Carl
Deschampsia cespitosa	Aira cespitosa	1753	1812	(L.) P.Beauv.	Afghanistan, Alaska, Albania, Alberta, Aleutian Is., Altay, Amur, Antipodean Is., Arizona, Austria, Baltic States, Belarus, Belgium, British Columbia, Bulgaria, Buryatiya, California, Cameroon, Central European Rus, Chatham Is., China North-Central, China South-Central, Chita, Colorado, Congo, Connecticut, Czechoslovakia, Denmark, East European Russia, East Himalaya, Ethiopia, Finland, France, Fø…	Ess. Agrostogr.: 91 (1812)	0	L.	0	Linné, Carl von;Linnaeus, Carl
Descurainia sophia	Sisymbrium sophia	1753	1892	(L.) Webb ex Prantl	Afghanistan, Albania, Algeria, Altay, Austria, Baleares, Baltic States, Belarus, Belgium, Bulgaria, Buryatiya, Central European Rus, China North-Central, China South-Central, China Southeast, Chita, Corse, Czechoslovakia, Denmark, East European Russia, East Himalaya, Egypt, Finland, France, Germany, Great Britain, Greece, Hungary, Iceland, Inner Mongolia, Iran, Iraq, Ireland, Irkutsk, Italy, Japa…	H.G.A.Engler &amp; K.A.E.Prantl, Nat. Pflanzenfam. 3(2): 192 (1892)	0	L.	0	Linné, Carl von;Linnaeus, Carl
Dianthus chinensis		1753	1753	L.	Altay, Amur, Buryatiya, Central European Rus, China North-Central, China Southeast, Chita, East European Russia, East Himalaya, Inner Mongolia, Irkutsk, Kazakhstan, Khabarovsk, Korea, Krasnoyarsk, Krym, Manchuria, Mongolia, Northwest European R, Primorye, Qinghai, South European Russi, Turkmenistan, Tuva, Ukraine, Vietnam, West Siberia, Xinjiang, Yakutskiya	Sp. Pl.: 411 (1753)	0	L.	0	Linné, Carl von;Linnaeus, Carl
Dichodon cerastoides	Stellaria cerastoides	1753	1841	(L.) Rchb.	Afghanistan, Albania, Altay, Austria, Bulgaria, Buryatiya, Chita, Czechoslovakia, Finland, France, Føroyar, Germany, Great Britain, Greece, Greenland, Iceland, Iran, Iraq, Italy, Kazakhstan, Kirgizstan, Krasnoyarsk, Labrador, Lebanon-Syria, Manchuria, Mongolia, Morocco, Newfoundland, North Caucasus, North European Russi, Northwest European R, Norway, Nunavut, Pakistan, Poland, Qinghai, Québec, Ro…	Icon. Fl. Germ. Helv. 5: t. 4915 (1841)	0	L.	0	Linné, Carl von;Linnaeus, Carl
Dicliptera chinensis	Justicia chinensis	1753	1807	(L.) Juss.	Afghanistan, Assam, Bangladesh, Cambodia, China South-Central, China Southeast, Hainan, India, Laos, Myanmar, Nansei-shoto, Pakistan, Taiwan, Thailand, Vietnam	Ann. Mus. Hist. Nat. 9: 268 (1807)	0	L.	0	Linné, Carl von;Linnaeus, Carl
Digitaria sanguinalis	Panicum sanguinale	1753	1771	(L.) Scop.	Afghanistan, Albania, Algeria, Andaman Is., Azores, Baleares, Bangladesh, Bismarck Archipelago, Borneo, Bulgaria, Burundi, Canary Is., Cape Verde, Chad, China North-Central, China South-Central, China Southeast, Corse, Cyprus, East Aegean Is., East Himalaya, Egypt, France, Greece, Gulf States, Hungary, India, Inner Mongolia, Iran, Iraq, Italy, Kazakhstan, Kirgizstan, Kriti, Krym, Laccadive Is., L…	Fl. Carniol., ed. 2, 1: 52 (1771)	0	L.	0	Linné, Carl von;Linnaeus, Carl
Dillenia indica		1753	1753	L.	Assam, Bangladesh, Borneo, Cambodia, China South-Central, China Southeast, East Himalaya, India, Jawa, Laos, Malaya, Myanmar, Nepal, Philippines, Sri Lanka, Sumatera, Thailand, Vietnam	Sp. Pl.: 535 (1753)	0	L.	0	Linné, Carl von;Linnaeus, Carl
Dioscorea bulbifera		1753	1753	L.	Andaman Is., Angola, Assam, Bangladesh, Benin, Borneo, Burkina, Burundi, Cambodia, Cameroon, Caprivi Strip, Caroline Is., Central African Repu, Chad, China North-Central, China South-Central, China Southeast, Christmas I., Congo, East Himalaya, Eritrea, Ethiopia, Gabon, Ghana, Guinea, Guinea-Bissau, Gulf of Guinea Is., Hainan, India, Ivory Coast, Japan, Jawa, Kenya, Korea, Laccadive Is., Laos, Le…	Sp. Pl.: 1033 (1753)	0	L.	0	Linné, Carl von;Linnaeus, Carl
Dioscorea pentaphylla		1753	1753	L.	Assam, Bangladesh, Borneo, Cambodia, Caroline Is., China South-Central, China Southeast, East Himalaya, Hainan, India, Jawa, Laos, Lesser Sunda Is., Malaya, Maldives, Maluku, Myanmar, Nansei-shoto, Nepal, New Guinea, Philippines, Queensland, Sri Lanka, Sulawesi, Sumatera, Taiwan, Thailand, Tibet, Vietnam, West Himalaya	Sp. Pl.: 1032 (1753)	0	L.	0	Linné, Carl von;Linnaeus, Carl
Diospyros lotus		1753	1753	L.	Afghanistan, China North-Central, China South-Central, China Southeast, Iran, Korea, Manchuria, Nepal, Pakistan, Tadzhikistan, Tibet, Transcaucasus, Turkey, West Himalaya	Sp. Pl.: 1057 (1753)	0	L.	0	Linné, Carl von;Linnaeus, Carl
Diplocyclos palmatus	Bryonia palmata	1753	1962	(L.) C.Jeffrey	Assam, Bangladesh, Burundi, Cambodia, Chad, China Southeast, Congo, East Himalaya, Ethiopia, Gulf of Guinea Is., Hainan, India, Kenya, KwaZulu-Natal, Laos, Lesser Sunda Is., Malaya, Mozambique, Myanmar, Namibia, Nansei-shoto, Nepal, New Guinea, Pakistan, Philippines, Rwanda, Sri Lanka, Sudan, Taiwan, Tanzania, Thailand, Uganda, Vietnam, West Himalaya, Yemen, Zaïre, Zimbabwe	Kew Bull. 15: 352 (1962)	0	L.	0	Linné, Carl von;Linnaeus, Carl
Dodartia orientalis		1753	1753	L.	Afghanistan, Altay, Central European Rus, China North-Central, China South-Central, Inner Mongolia, Iran, Kazakhstan, Kirgizstan, Mongolia, North Caucasus, South European Russi, Tadzhikistan, Transcaucasus, Turkey, Turkmenistan, Ukraine, Uzbekistan, Xinjiang	Sp. Pl.: 633 (1753)	0	L.	0	Linné, Carl von;Linnaeus, Carl
Dolichos trilobus		1753	1753	L.	Angola, Assam, Bangladesh, Cameroon, China South-Central, China Southeast, East Himalaya, Ethiopia, Hainan, India, Jawa, Kenya, KwaZulu-Natal, Laos, Lesser Sunda Is., Malawi, Mozambique, Myanmar, Namibia, Nepal, Philippines, Rwanda, Somalia, Sri Lanka, Sudan, Taiwan, Tanzania, Uganda, Vietnam, West Himalaya, Yemen, Zambia, Zimbabwe	Sp. Pl.: 726 (1753)	0	L.	0	Linné, Carl von;Linnaeus, Carl
Dontostemon integrifolius	Sisymbrium integrifolium	1753	1841	(L.) Ledeb.	Amur, Buryatiya, China North-Central, Chita, Inner Mongolia, Irkutsk, Manchuria, Mongolia, Primorye, Tuva, Xinjiang, Yakutskiya	Fl. Ross. 1: 174 (1841)	0	L.	0	Linné, Carl von;Linnaeus, Carl
Draba nemorosa		1753	1753	L.	Afghanistan, Alaska, Alberta, Altay, Amur, Austria, Baltic States, Belarus, British Columbia, Buryatiya, California, Central European Rus, China North-Central, China South-Central, China Southeast, Chita, Colorado, Czechoslovakia, East European Russia, Finland, France, Hungary, Idaho, Illinois, Inner Mongolia, Iowa, Iran, Irkutsk, Italy, Japan, Kamchatka, Kazakhstan, Khabarovsk, Kirgizstan, Korea…	Sp. Pl.: 643 (1753)	0	L.	0	Linné, Carl von;Linnaeus, Carl
Dracocephalum grandiflorum		1753	1753	L.	Altay, Buryatiya, Chita, Inner Mongolia, Irkutsk, Kazakhstan, Kirgizstan, Krasnoyarsk, Mongolia, Tadzhikistan, Tuva, West Siberia, Xinjiang	Sp. Pl.: 595 (1753)	0	L.	0	Linné, Carl von;Linnaeus, Carl
Dracocephalum moldavica		1753	1753	L.	Afghanistan, Amur, China North-Central, Chita, Inner Mongolia, Iran, Kazakhstan, Krasnoyarsk, Manchuria, Mongolia, Primorye, Qinghai, Tadzhikistan, Turkmenistan, Tuva, West Himalaya, West Siberia	Sp. Pl.: 595 (1753)	0	L.	0	Linné, Carl von;Linnaeus, Carl
Dracocephalum nutans		1753	1753	L.	Altay, Amur, Buryatiya, Chita, Inner Mongolia, Irkutsk, Kazakhstan, Khabarovsk, Kirgizstan, Krasnoyarsk, Manchuria, Mongolia, Primorye, South European Russi, Tadzhikistan, Tuva, West Himalaya, West Siberia, Xinjiang, Yakutskiya	Sp. Pl.: 596 (1753)	0	L.	0	Linné, Carl von;Linnaeus, Carl
Dracocephalum ruyschiana		1753	1753	L.	Altay, Amur, Austria, Baltic States, Belarus, Buryatiya, Central European Rus, Chita, East European Russia, France, Germany, Hungary, Inner Mongolia, Irkutsk, Italy, Kazakhstan, Kirgizstan, Krasnoyarsk, Manchuria, Mongolia, North Caucasus, North European Russi, Northwest European R, Norway, Poland, Romania, Sweden, Switzerland, Transcaucasus, Turkey, Turkmenistan, Tuva, Ukraine, Uzbekistan, West …	Sp. Pl.: 595 (1753)	0	L.	0	Linné, Carl von;Linnaeus, Carl
Drosera indica		1753	1753	L.	Angola, Bangladesh, Benin, Borneo, Burkina, Cambodia, Cameroon, Central African Repu, Chad, China Southeast, Congo, Ethiopia, Gabon, Gambia, Ghana, Guinea, Guinea-Bissau, Hainan, India, Ivory Coast, Japan, Jawa, Kenya, Laos, Lesser Sunda Is., Liberia, Madagascar, Malaya, Mali, Mozambique, Myanmar, Namibia, New Guinea, Niger, Nigeria, Northern Provinces, Philippines, Senegal, Sierra Leone, Sri Lan…	Sp. Pl.: 282 (1753)	0	L.	0	Linné, Carl von;Linnaeus, Carl
Drosera rotundifolia		1753	1753	L.	Alabama, Alaska, Alberta, Aleutian Is., Altay, Amur, Austria, Baltic States, Belarus, Belgium, British Columbia, Bulgaria, Buryatiya, California, Central European Rus, China Southeast, Chita, Colorado, Connecticut, Corse, Czechoslovakia, Delaware, Denmark, District of Columbia, East European Russia, Finland, France, Føroyar, Georgia, Germany, Great Britain, Greece, Greenland, Hungary, Iceland, Id…	Sp. Pl.: 282 (1753)	0	L.	0	Linné, Carl von;Linnaeus, Carl
Dryas octopetala		1753	1753	L.	Albania, Austria, Bulgaria, Buryatiya, Czechoslovakia, East European Russia, Finland, France, Føroyar, Germany, Great Britain, Greece, Greenland, Iceland, Ireland, Irkutsk, Italy, Kamchatka, Khabarovsk, Krasnoyarsk, Magadan, Manchuria, Mongolia, North Caucasus, North European Russi, Norway, Poland, Romania, Spain, Svalbard, Sweden, Switzerland, Tibet, Transcaucasus, Ukraine, West Siberia, Xinjian…	Sp. Pl.: 501 (1753)	0	L.	0	Linné, Carl von;Linnaeus, Carl
Drynaria quercifolia	Polypodium quercifolium	1753	1841	(L.) J.Sm.	Andaman Is., Bangladesh, Borneo, Cambodia, Hainan, India, Jawa, Laos, Lesser Sunda Is., Malaya, Maluku, Nepal, New Guinea, Nicobar Is., Northern Territory, Philippines, Queensland, Sri Lanka, Sulawesi, Sumatera, Thailand, Vietnam, Western Australia	J. Bot. (Hooker) 3: 398 (1841)	0	L.	0	Linné, Carl von;Linnaeus, Carl
Dryopteris filix-mas	Polypodium filix-mas	1753	1834	(L.) Schott	Afghanistan, Albania, Alberta, Algeria, Altay, Arizona, Austria, Baltic States, Belarus, Belgium, British Columbia, Bulgaria, Buryatiya, California, Central European Rus, Chita, Colorado, Corse, Czechoslovakia, Denmark, East European Russia, Finland, France, Germany, Great Britain, Greece, Greenland, Hungary, Iceland, Idaho, Illinois, Iran, Ireland, Irkutsk, Italy, Kazakhstan, Kentucky, Kirgizsta…	Gen. Fil.: pl. 9 (1834)	0	L.	0	Linné, Carl von;Linnaeus, Carl
Dryopteris fragrans	Polypodium fragrans	1753	1834	(L.) Schott	Alaska, Alberta, Altay, Amur, British Columbia, Buryatiya, China North-Central, Chita, Finland, Greenland, Inner Mongolia, Irkutsk, Japan, Kamchatka, Khabarovsk, Korea, Krasnoyarsk, Labrador, Magadan, Maine, Manchuria, Manitoba, Michigan, Minnesota, Mongolia, New Brunswick, New Hampshire, New York, Newfoundland, North European Russi, Northwest Territorie, Nova Scotia, Ontario, Primorye, Québec, S…	Gen. Fil.: t. 9 (1834)	0	L.	0	Linné, Carl von;Linnaeus, Carl
Dryopteris varia	Polypodium varium	1753	1891	(L.) Kuntze	Assam, China South-Central, China Southeast, Japan, Korea, Myanmar, Nansei-shoto, Philippines, Sulawesi, Taiwan, Vietnam	Revis. Gen. Pl. 2: 814 (1891)	0	L.	0	Linné, Carl von;Linnaeus, Carl
Dysphania botrys	Chenopodium botrys	1753	2002	(L.) Mosyakin & Clemants	Afghanistan, Albania, Bulgaria, Corse, Cyprus, East Aegean Is., East Himalaya, France, Greece, Hungary, Iran, Iraq, Italy, Kazakhstan, Kirgizstan, Kriti, Krym, Lebanon-Syria, Mongolia, North Caucasus, Pakistan, Portugal, Romania, Sardegna, Saudi Arabia, Sicilia, South European Russi, Spain, Switzerland, Tadzhikistan, Tibet, Transcaucasus, Turkey, Turkey-in-Europe, Turkmenistan, Ukraine, Uzbekista…	Ukrayins&#x27;k. Bot. Zhurn. 59: 383 (2002)	0	L.	0	Linné, Carl von;Linnaeus, Carl
Echinochloa crus-galli	Panicum crus-galli	1753	1812	(L.) P.Beauv.	Afghanistan, Albania, Algeria, Altay, Amur, Andaman Is., Assam, Azores, Baleares, Bangladesh, Belarus, Botswana, Bulgaria, Burkina, Buryatiya, Cambodia, Canary Is., Cape Provinces, Central European Rus, China North-Central, China South-Central, China Southeast, Chita, Corse, Cyprus, East Aegean Is., East European Russia, East Himalaya, Egypt, France, Free State, Greece, Gulf States, India, Inner …	Ess. Agrostogr.: 53 (1812)	0	L.	0	Linné, Carl von;Linnaeus, Carl
Echinops sphaerocephalus		1753	1753	L.	Albania, Altay, Austria, Baltic States, Belarus, Bulgaria, Central European Rus, Czechoslovakia, East European Russia, France, Greece, Hungary, Italy, Kazakhstan, Krasnoyarsk, Krym, North Caucasus, Poland, Romania, Saudi Arabia, South European Russi, Spain, Switzerland, Transcaucasus, Turkey, Turkey-in-Europe, Ukraine, West Siberia, Xinjiang, Yugoslavia	Sp. Pl.: 814 (1753)	0	L.	0	Linné, Carl von;Linnaeus, Carl
Echium vulgare		1753	1753	L.	Albania, Altay, Austria, Baltic States, Belarus, Belgium, Bulgaria, Central European Rus, Corse, Cyprus, Czechoslovakia, Denmark, East Aegean Is., East European Russia, Finland, France, Germany, Great Britain, Hungary, Ireland, Irkutsk, Italy, Kazakhstan, Kirgizstan, Krasnoyarsk, Krym, Netherlands, Northwest European R, Norway, Poland, Portugal, Romania, Sardegna, Sicilia, South European Russi, S…	Sp. Pl.: 139 (1753)	0	L.	0	Linné, Carl von;Linnaeus, Carl
Elaeagnus angustifolia		1753	1753	L.	Afghanistan, Altay, Central European Rus, China North-Central, China Southeast, East Aegean Is., East European Russia, Inner Mongolia, Iran, Kazakhstan, Kirgizstan, Lebanon-Syria, Manchuria, Mongolia, Myanmar, North Caucasus, Pakistan, Palestine, Qinghai, South European Russi, Tadzhikistan, Transcaucasus, Turkey, Turkmenistan, Ukraine, Uzbekistan, West Himalaya, West Siberia, Xinjiang	Sp. Pl.: 121 (1753)	0	L.	0	Linné, Carl von;Linnaeus, Carl
Eleocharis acicularis	Scirpus acicularis	1753	1817	(L.) Roem. & Schult.	Afghanistan, Alabama, Alaska, Alberta, Altay, Arizona, Arkansas, Austria, Baltic States, Belarus, Belgium, Bolivia, British Columbia, Bulgaria, California, Central European Rus, Colombia, Colorado, Connecticut, Corse, Costa Rica, Czechoslovakia, Delaware, Denmark, District of Columbia, East European Russia, Ecuador, El Salvador, Finland, Florida, France, Georgia, Germany, Great Britain, Greece, G…	Syst. Veg., ed. 15 bis 2: 154 (1817)	0	L.	0	Linné, Carl von;Linnaeus, Carl
Eleocharis geniculata	Scirpus geniculatus	1753	1817	(L.) Roem. & Schult.	Afghanistan, Alabama, Andaman Is., Arizona, Aruba, Bahamas, Bangladesh, Belize, Benin, Bermuda, Bolivia, Borneo, Botswana, Brazil North, Brazil Northeast, Brazil West-Central, Burkina, California, Cameroon, Cape Provinces, Caroline Is., Cayman Is., Central American Pac, Chad, Chagos Archipelago, China Southeast, Christmas I., Cocos (Keeling) Is., Colombia, Congo, Cook Is., Costa Rica, Cuba, Djibo…	Syst. Veg., ed. 15 bis 2: 150 (1817)	0	L.	0	Linné, Carl von;Linnaeus, Carl
Eleocharis palustris	Scirpus palustris	1753	1817	(L.) Roem. & Schult.	Afghanistan, Alabama, Alaska, Albania, Alberta, Algeria, Altay, Arizona, Arkansas, Assam, Austria, Azores, Baleares, Baltic States, Bangladesh, Belarus, Belgium, British Columbia, Bulgaria, Buryatiya, California, Canary Is., Central European Rus, China North-Central, Chita, Colorado, Connecticut, Corse, Cyprus, Czechoslovakia, Delaware, Denmark, East Aegean Is., East European Russia, Egypt, Finla…	Syst. Veg., ed. 15 bis 2: 151 (1817)	0	L.	0	Linné, Carl von;Linnaeus, Carl
Elephantopus scaber		1753	1753	L.	Andaman Is., Bangladesh, Cambodia, China South-Central, China Southeast, East Himalaya, Hainan, Jawa, Laos, Malaya, Myanmar, Nansei-shoto, Nepal, Nicobar Is., Sri Lanka, Taiwan, Thailand, Vietnam	Sp. Pl.: 814 (1753)	0	L.	0	Linné, Carl von;Linnaeus, Carl
Eleusine indica	Cynosurus indicus	1753	1788	(L.) Gaertn.	Aldabra, Angola, Assam, Bangladesh, Benin, Bismarck Archipelago, Borneo, Botswana, Burkina, Burundi, Cambodia, Cameroon, Cape Provinces, Cape Verde, Central African Repu, Chad, China North-Central, China South-Central, China Southeast, Comoros, Congo, East Aegean Is., East Himalaya, Equatorial Guinea, Ethiopia, Gabon, Gambia, Ghana, Guinea, Guinea-Bissau, Gulf of Guinea Is., Hainan, India, Iran, …	Fruct. Sem. Pl. 1: 8 (1788)	0	L.	0	Linné, Carl von;Linnaeus, Carl
Eleutherococcus trifoliatus	Zanthoxylum trifoliatum	1753	1980	(L.) S.Y.Hu	Assam, China South-Central, China Southeast, Myanmar, Nepal, Philippines, Taiwan, Thailand, Vietnam	J. Arnold Arbor. 61: 110 (1980)	0	L.	0	Linné, Carl von;Linnaeus, Carl
Elymus caninus	Triticum caninum	1753	1755	(L.) L.	Afghanistan, Albania, Altay, Baltic States, Belarus, Belgium, Bulgaria, Buryatiya, Central European Rus, Corse, Czechoslovakia, Denmark, East European Russia, Finland, France, Germany, Great Britain, Greece, Hungary, Iceland, Iran, Iraq, Ireland, Irkutsk, Italy, Kazakhstan, Kirgizstan, Krasnoyarsk, Krym, North Caucasus, North European Russi, Northwest European R, Norway, Pakistan, Poland, Portuga…	Fl. Suec., ed. 2: 39 (1755)	0	L.	0	Linné, Carl von;Linnaeus, Carl
Elymus repens	Triticum repens	1753	1947	(L.) Gould	Afghanistan, Albania, Algeria, Altay, Amur, Austria, Baleares, Baltic States, Belarus, Belgium, Bulgaria, Buryatiya, Central European Rus, China North-Central, China South-Central, Chita, Corse, Cyprus, Czechoslovakia, Denmark, East Aegean Is., East European Russia, East Himalaya, Finland, France, Føroyar, Germany, Great Britain, Greece, Hungary, Iceland, Inner Mongolia, Iran, Iraq, Ireland, Irku…	Madroño 9: 127 (1947)	0	L.	0	Linné, Carl von;Linnaeus, Carl
Elymus sibiricus		1753	1753	L.	Alaska, Altay, Amur, Belarus, British Columbia, Buryatiya, China North-Central, China South-Central, China Southeast, Chita, East European Russia, Inner Mongolia, Irkutsk, Japan, Kamchatka, Kazakhstan, Khabarovsk, Kirgizstan, Korea, Krasnoyarsk, Magadan, Manchuria, Mongolia, Nepal, North European Russi, Northwest Territorie, Primorye, Qinghai, Sakhalin, South European Russi, Tadzhikistan, Tibet, …	Sp. Pl.: 83 (1753)	0	L.	0	Linné, Carl von;Linnaeus, Carl
Emilia sonchifolia	Cacalia sonchifolia	1753	1834	(L.) DC.	Angola, Bangladesh, Benin, Cameroon, China North-Central, China South-Central, China Southeast, Congo, East Himalaya, Gabon, Guinea-Bissau, Gulf of Guinea Is., Hainan, India, Ivory Coast, Japan, Jawa, Laccadive Is., Madagascar, Malaya, Mauritius, Mozambique, Myanmar, Nansei-shoto, Nepal, Philippines, Réunion, Senegal, Seychelles, South China Sea, Sri Lanka, Taiwan, Thailand, Vietnam, Yemen	R.Wight, Contr. Bot. India: 24 (1834)	0	L.	0	Linné, Carl von;Linnaeus, Carl
Ephedra distachya		1753	1753	L.	Albania, Altay, Austria, Bulgaria, Corse, Czechoslovakia, East European Russia, France, Greece, Hungary, Italy, Kazakhstan, Krym, North Caucasus, Romania, Sardegna, Sicilia, South European Russi, Spain, Switzerland, Transcaucasus, Turkey, Turkey-in-Europe, Turkmenistan, Ukraine, West Siberia, Xinjiang, Yugoslavia	Sp. Pl.: 1040 (1753)	0	L.	0	Linné, Carl von;Linnaeus, Carl
Epilobium angustifolium		1753	1753	L.	Afghanistan, Albania, Altay, Amur, Austria, Baltic States, Bangladesh, Belarus, Belgium, Bulgaria, Buryatiya, Central European Rus, China North-Central, China South-Central, Chita, Corse, Cyprus, Czechoslovakia, Denmark, East European Russia, East Himalaya, Finland, France, Føroyar, Germany, Great Britain, Greece, Greenland, Hungary, Iceland, Inner Mongolia, Iran, Iraq, Ireland, Irkutsk, Italy, K…	Sp. Pl.: 347 (1753)	0	L.	0	Linné, Carl von;Linnaeus, Carl
Epilobium hirsutum		1753	1753	L.	Afghanistan, Albania, Algeria, Altay, Angola, Austria, Baleares, Baltic States, Belarus, Belgium, Bulgaria, Burundi, Canary Is., Cape Provinces, Cape Verde, Central African Repu, Central European Rus, Chad, China North-Central, China South-Central, China Southeast, Corse, Cyprus, Czechoslovakia, Denmark, East Aegean Is., East European Russia, Egypt, Eritrea, Ethiopia, France, Free State, Germany,…	Sp. Pl.: 347 (1753)	0	L.	0	Linné, Carl von;Linnaeus, Carl
Epilobium latifolium		1753	1753	L.	Afghanistan, Aleutian Is., Altay, Amur, Buryatiya, California, China South-Central, Chita, Colorado, East European Russia, Greenland, Iceland, Irkutsk, Japan, Kamchatka, Kazakhstan, Khabarovsk, Kirgizstan, Krasnoyarsk, Kuril Is., Magadan, Mongolia, North European Russi, Pakistan, Qinghai, Québec, South Dakota, Tadzhikistan, Tibet, Tuva, West Himalaya, West Siberia, Xinjiang, Yakutskiya	Sp. Pl.: 347 (1753)	0	L.	0	Linné, Carl von;Linnaeus, Carl
Epilobium palustre		1753	1753	L.	Afghanistan, Alaska, Albania, Alberta, Altay, Amur, Austria, Baltic States, Belarus, Belgium, Bulgaria, Buryatiya, California, Central European Rus, China North-Central, China South-Central, China Southeast, Chita, Colorado, Czechoslovakia, Denmark, East European Russia, East Himalaya, Finland, France, Føroyar, Germany, Great Britain, Greece, Greenland, Hungary, Iceland, Illinois, Inner Mongolia,…	Sp. Pl.: 348 (1753)	0	L.	0	Linné, Carl von;Linnaeus, Carl
Epipactis helleborine	Serapias helleborine	1753	1769	(L.) Crantz	Afghanistan, Albania, Algeria, Altay, Austria, Baltic States, Belarus, Belgium, Bulgaria, Buryatiya, Central European Rus, China North-Central, China South-Central, China Southeast, Corse, Cyprus, Czechoslovakia, Denmark, East Aegean Is., East European Russia, East Himalaya, Finland, France, Germany, Great Britain, Greece, Hungary, Iran, Iraq, Ireland, Irkutsk, Italy, Kazakhstan, Kirgizstan, Kras…	Stirp. Austr. Fasc., ed. 2, 2: 467 (1769)	0	L.	0	Linné, Carl von;Linnaeus, Carl
Epipactis palustris	Serapias helleborine var. palustris	1753	1769	(L.) Crantz	Albania, Altay, Austria, Baltic States, Belarus, Belgium, Bulgaria, Central European Rus, Czechoslovakia, Denmark, East European Russia, Finland, France, Germany, Great Britain, Greece, Hungary, Iran, Ireland, Irkutsk, Italy, Kazakhstan, Kirgizstan, Krasnoyarsk, Krym, Mongolia, Netherlands, North Caucasus, North European Russi, Northwest European R, Norway, Poland, Portugal, Romania, Sardegna, Si…	Stirp. Austr. Fasc., ed. 2, 2: 463 (1769)	0	L.	0	Linné, Carl von;Linnaeus, Carl
Equisetum arvense		1753	1753	L.	Afghanistan, Alabama, Alaska, Albania, Alberta, Aleutian Is., Altay, Amur, Arizona, Arkansas, Austria, Azores, Baleares, Baltic States, Belarus, Belgium, British Columbia, Bulgaria, Buryatiya, California, Central European Rus, China North-Central, China South-Central, China Southeast, Chita, Colorado, Connecticut, Corse, Cyprus, Czechoslovakia, Delaware, Denmark, District of Columbia, East Europe…	Sp. Pl.: 1061 (1753)	0	L.	0	Linné, Carl von;Linnaeus, Carl
Equisetum fluviatile		1753	1753	L.	Alaska, Albania, Alberta, Altay, Amur, Austria, Baltic States, Belarus, Belgium, British Columbia, Bulgaria, Buryatiya, Central European Rus, China North-Central, China South-Central, Chita, Connecticut, Czechoslovakia, Delaware, Denmark, District of Columbia, East European Russia, Finland, France, Føroyar, Germany, Great Britain, Greece, Hungary, Iceland, Idaho, Illinois, Indiana, Inner Mongolia…	Sp. Pl.: 1062 (1753)	0	L.	0	Linné, Carl von;Linnaeus, Carl
Equisetum hyemale		1753	1753	L.	Albania, Altay, Amur, Austria, Baltic States, Belarus, Belgium, Bulgaria, Buryatiya, Central European Rus, China North-Central, China South-Central, China Southeast, Chita, Corse, Czechoslovakia, Denmark, East European Russia, Finland, France, Germany, Great Britain, Greece, Hungary, Iceland, Inner Mongolia, Ireland, Irkutsk, Italy, Japan, Kamchatka, Kazakhstan, Khabarovsk, Kirgizstan, Korea, Kra…	Sp. Pl.: 1062 (1753)	0	L.	0	Linné, Carl von;Linnaeus, Carl
Equisetum palustre		1753	1753	L.	Afghanistan, Alaska, Albania, Alberta, Altay, Amur, Austria, Baltic States, Belarus, Belgium, British Columbia, Bulgaria, Buryatiya, California, Central European Rus, China North-Central, China South-Central, China Southeast, Chita, Connecticut, Corse, Czechoslovakia, Denmark, East European Russia, Finland, France, Føroyar, Germany, Great Britain, Greece, Hungary, Iceland, Idaho, Illinois, Inner …	Sp. Pl.: 1061 (1753)	0	L.	0	Linné, Carl von;Linnaeus, Carl
Equisetum sylvaticum		1753	1753	L.	Alaska, Alberta, Altay, Amur, Austria, Baltic States, Belarus, Belgium, British Columbia, Bulgaria, Buryatiya, Central European Rus, China North-Central, Chita, Connecticut, Cyprus, Delaware, Denmark, East European Russia, Finland, France, Germany, Great Britain, Greece, Greenland, Hungary, Iceland, Idaho, Illinois, Inner Mongolia, Iowa, Ireland, Irkutsk, Italy, Japan, Kamchatka, Kazakhstan, Khab…	Sp. Pl.: 1061 (1753)	0	L.	0	Linné, Carl von;Linnaeus, Carl
Eragrostis pilosa	Poa pilosa	1753	1812	(L.) P.Beauv.	Afghanistan, Albania, Algeria, Altay, Amur, Andaman Is., Angola, Assam, Austria, Bangladesh, Belarus, Benin, Borneo, Botswana, Bulgaria, Burkina, Burundi, Buryatiya, Cameroon, Cape Provinces, Caprivi Strip, Central African Repu, Central European Rus, Chad, China North-Central, China South-Central, China Southeast, Chita, Congo, Corse, Czechoslovakia, East Aegean Is., East European Russia, East Hi…	Ess. Agrostogr.: 71 (1812)	0	L.	0	Linné, Carl von;Linnaeus, Carl
Eragrostis tenella	Poa tenella	1753	1817	(L.) P.Beauv. ex Roem. & Schult.	Afghanistan, Aldabra, Andaman Is., Angola, Assam, Bangladesh, Benin, Bismarck Archipelago, Borneo, Botswana, Burkina, Burundi, Cambodia, Cameroon, Cape Provinces, Central African Repu, Chad, China North-Central, China South-Central, China Southeast, Christmas I., Cocos (Keeling) Is., Congo, Djibouti, East Himalaya, Eritrea, Ethiopia, Gabon, Gambia, Ghana, Guinea, Guinea-Bissau, Gulf of Guinea Is.…	Syst. Veg., ed. 15 bis 2: 576 (1817)	0	L.	0	Linné, Carl von;Linnaeus, Carl
Eremochloa ciliaris	Nardus ciliaris	1753	1906	(L.) Merr.	Bangladesh, Cambodia, China South-Central, China Southeast, Hainan, Laos, Lesser Sunda Is., Malaya, Myanmar, New Guinea, Philippines, Queensland, Sulawesi, Sumatera, Taiwan, Thailand, Vietnam	Philipp. J. Sci. 1(Suppl.): 311 (1906)	0	L.	0	Linné, Carl von;Linnaeus, Carl
Eremopyrum orientale	Secale orientale	1753	1851	(L.) Jaub. & Spach	Afghanistan, Algeria, Central European Rus, Inner Mongolia, Iran, Iraq, Kazakhstan, Kirgizstan, Krym, Lebanon-Syria, Morocco, North Caucasus, Pakistan, Palestine, Romania, South European Russi, Tibet, Transcaucasus, Tunisia, Turkey, Turkmenistan, Ukraine, Uzbekistan, West Himalaya, Xinjiang	Ill. Pl. Orient. 4: 26 (1851)	0	L.	0	Linné, Carl von;Linnaeus, Carl
Erigeron acris		1753	1753	L.	Alaska, Alberta, Altay, Amur, Austria, Baltic States, Belarus, British Columbia, Buryatiya, Central European Rus, China North-Central, China South-Central, China Southeast, Chita, Colorado, Corse, Czechoslovakia, East European Russia, Finland, France, Germany, Great Britain, Greece, Hungary, Idaho, India, Inner Mongolia, Iran, Iraq, Ireland, Irkutsk, Italy, Japan, Kamchatka, Kazakhstan, Khabarovs…	Sp. Pl.: 863 (1753)	0	L.	0	Linné, Carl von;Linnaeus, Carl
Eriocaulon setaceum		1753	1753	L.	Andaman Is., Angola, Assam, Bangladesh, Botswana, Burundi, Cambodia, Cameroon, Central African Repu, Chad, China South-Central, China Southeast, Congo, Gabon, Ghana, Guinea, Guinea-Bissau, Hainan, India, Ivory Coast, Jawa, Korea, Laos, Liberia, Madagascar, Mali, Myanmar, New Guinea, Nigeria, Northern Territory, Queensland, Senegal, Sierra Leone, Sri Lanka, Sudan, Sumatera, Tanzania, Thailand, Tog…	Sp. Pl.: 87 (1753)	0	L.	0	Linné, Carl von;Linnaeus, Carl
Eriocaulon sexangulare		1753	1753	L.	Bangladesh, Borneo, Cambodia, Caroline Is., China Southeast, Hainan, India, Jawa, Laos, Madagascar, Malaya, Myanmar, Nansei-shoto, New Guinea, Philippines, Sri Lanka, Sumatera, Taiwan, Thailand, Vietnam	Sp. Pl.: 87 (1753)	0	L.	0	Linné, Carl von;Linnaeus, Carl
Eriophorum vaginatum		1753	1753	L.	Alaska, Alberta, Altay, Amur, Austria, Baltic States, Belarus, Belgium, British Columbia, Buryatiya, Central European Rus, Chita, Connecticut, Czechoslovakia, Denmark, East European Russia, Finland, France, Føroyar, Germany, Great Britain, Greece, Greenland, Hungary, Indiana, Inner Mongolia, Ireland, Irkutsk, Italy, Japan, Kamchatka, Kazakhstan, Khabarovsk, Korea, Krasnoyarsk, Kuril Is., Labrador…	Sp. Pl.: 52 (1753)	0	L.	0	Linné, Carl von;Linnaeus, Carl
Erodium cicutarium	Geranium cicutarium	1753	1789	(L.) L'Hér.	Afghanistan, Albania, Algeria, Altay, Austria, Azores, Baleares, Baltic States, Belarus, Belgium, Bulgaria, Buryatiya, Canary Is., Central European Rus, Chad, China North-Central, China South-Central, China Southeast, Chita, Cyprus, Czechoslovakia, Denmark, East Aegean Is., East European Russia, Egypt, Eritrea, Finland, France, Germany, Great Britain, Greece, Gulf States, Hungary, Inner Mongolia,…	W.Aiton, Hort. Kew. 2: 414 (1789)	0	L.	0	Linné, Carl von;Linnaeus, Carl
Eruca vesicaria	Brassica vesicaria	1753	1802	(L.) Cav.	Afghanistan, Algeria, Baleares, Bulgaria, China North-Central, China South-Central, China Southeast, Corse, Cyprus, East Aegean Is., Egypt, Greece, Gulf States, Inner Mongolia, Iran, Iraq, Italy, Kazakhstan, Kirgizstan, Kriti, Krym, Kuwait, Lebanon-Syria, Libya, Manchuria, Mongolia, Morocco, Pakistan, Palestine, Portugal, Qinghai, Sardegna, Saudi Arabia, Sicilia, Sinai, Spain, Tadzhikistan, Tunis…	Descr. Pl.: 426 (1802)	0	L.	0	Linné, Carl von;Linnaeus, Carl
Eryngium planum		1753	1753	L.	Altay, Austria, Central European Rus, Czechoslovakia, East European Russia, Germany, Hungary, Kazakhstan, Krym, Mongolia, Northwest European R, Poland, Romania, South European Russi, Transcaucasus, Turkey-in-Europe, Ukraine, West Himalaya, West Siberia, Xinjiang, Yugoslavia	Sp. Pl.: 233 (1753)	0	L.	0	Linné, Carl von;Linnaeus, Carl
Erysimum cheiranthoides		1753	1753	L.	Altay, Amur, Austria, Baltic States, Belarus, Belgium, Bulgaria, Buryatiya, Central European Rus, China North-Central, China South-Central, Chita, Czechoslovakia, Denmark, East European Russia, Finland, France, Germany, Great Britain, Hungary, Iceland, Inner Mongolia, Ireland, Irkutsk, Japan, Kamchatka, Kazakhstan, Khabarovsk, Kirgizstan, Korea, Krasnoyarsk, Kuril Is., Magadan, Manchuria, Mongoli…	Sp. Pl.: 661 (1753)	0	L.	0	Linné, Carl von;Linnaeus, Carl
Erysimum repandum		1753	1753	L.	Afghanistan, Albania, Austria, Bulgaria, Cyprus, Czechoslovakia, Germany, Greece, Hungary, Iran, Iraq, Italy, Kazakhstan, Kirgizstan, Krym, Lebanon-Syria, North Caucasus, Pakistan, Palestine, Poland, Romania, South European Russi, Spain, Tadzhikistan, Transcaucasus, Turkey, Turkey-in-Europe, Turkmenistan, Ukraine, Uzbekistan, West Himalaya, Xinjiang, Yugoslavia	Demonstr. Pl.: 17 (1753)	0	L.	0	Linné, Carl von;Linnaeus, Carl
Eupatorium chinense		1753	1753	L.	Assam, China North-Central, China South-Central, China Southeast, East Himalaya, Hainan, Japan, Korea, Nepal, Pakistan, Taiwan, Vietnam, West Himalaya	Sp. Pl.: 837 (1753)	0	L.	0	Linné, Carl von;Linnaeus, Carl
Euphorbia esula		1753	1753	L.	Afghanistan, Albania, Altay, Amur, Austria, Azores, Baltic States, Belarus, Belgium, Bulgaria, Buryatiya, Central European Rus, China North-Central, China South-Central, China Southeast, Chita, Corse, Czechoslovakia, East European Russia, France, Germany, Hungary, Inner Mongolia, Iran, Irkutsk, Italy, Kamchatka, Kazakhstan, Khabarovsk, Kirgizstan, Korea, Krasnoyarsk, Lebanon-Syria, Manchuria, Mon…	Sp. Pl.: 461 (1753)	0	L.	0	Linné, Carl von;Linnaeus, Carl
Euphorbia falcata		1753	1753	L.	Afghanistan, Albania, Algeria, Altay, Austria, Baleares, Baltic States, Bulgaria, Corse, Cyprus, Czechoslovakia, East Aegean Is., Egypt, France, Germany, Greece, Gulf States, Hungary, Iran, Iraq, Italy, Kazakhstan, Kirgizstan, Kriti, Lebanon-Syria, Libya, Mongolia, Morocco, North European Russi, Oman, Pakistan, Palestine, Poland, Portugal, Primorye, Romania, Saudi Arabia, Spain, Switzerland, Tadz…	Sp. Pl.: 456 (1753)	0	L.	0	Linné, Carl von;Linnaeus, Carl
Euphorbia helioscopia		1753	1753	L.	Afghanistan, Albania, Algeria, Altay, Austria, Azores, Baleares, Baltic States, Bangladesh, Belarus, Belgium, Bulgaria, Canary Is., Central European Rus, China North-Central, China South-Central, China Southeast, Corse, Cyprus, Czechoslovakia, East Aegean Is., East European Russia, Egypt, Finland, France, Germany, Great Britain, Greece, Gulf States, Hainan, Hungary, India, Inner Mongolia, Iran, I…	Sp. Pl.: 459 (1753)	0	L.	0	Linné, Carl von;Linnaeus, Carl
Euphorbia lathyris		1753	1753	L.	Kirgizstan, Pakistan, Xinjiang	Sp. Pl.: 457 (1753)	0	L.	0	Linné, Carl von;Linnaeus, Carl
Euphorbia palustris		1753	1753	L.	Albania, Altay, Austria, Baltic States, Belarus, Belgium, Bulgaria, Central European Rus, Corse, Czechoslovakia, Denmark, East European Russia, Finland, France, Germany, Greece, Hungary, Italy, Kazakhstan, Krasnoyarsk, Netherlands, North Caucasus, Northwest European R, Norway, Poland, Romania, South European Russi, Spain, Sweden, Switzerland, Transcaucasus, Turkey, Turkey-in-Europe, Ukraine, West…	Sp. Pl.: 462 (1753)	0	L.	0	Linné, Carl von;Linnaeus, Carl
Euphorbia pilosa		1753	1753	L.	Altay, Irkutsk, Kazakhstan, Krasnoyarsk, Mongolia, Tuva, West Siberia, Xinjiang	Sp. Pl.: 460 (1753)	0	L.	0	Linné, Carl von;Linnaeus, Carl
Evolvulus alsinoides	Convolvulus alsinoides	1753	1762	(L.) L.	Afghanistan, Alabama, Aldabra, Angola, Arizona, Assam, Bahamas, Bangladesh, Belize, Benin, Bismarck Archipelago, Bolivia, Botswana, Brazil North, Brazil Northeast, Brazil South, Brazil Southeast, Brazil West-Central, Burundi, Cambodia, Cameroon, Cape Provinces, Cape Verde, Central African Repu, Chad, China South-Central, China Southeast, Colombia, Comoros, Congo, Costa Rica, Cuba, Dominican Repub…	Sp. Pl. ed. 2: 392 (1762)	0	L.	0	Linné, Carl von;Linnaeus, Carl
Exallage auricularia	Hedyotis auricularia	1753	1952	(L.) Bremek.	Andaman Is., Assam, Bangladesh, Borneo, China South-Central, China Southeast, East Himalaya, Hainan, India, Jawa, Lesser Sunda Is., Malaya, Myanmar, Nansei-shoto, Nepal, Philippines, Sri Lanka, Sumatera, Thailand, Vietnam	Verh. Kon. Ned. Akad. Wetensch., Afd. Natuurk., Sect. 2, 48(2): 142 (1952)	0	L.	0	Linné, Carl von;Linnaeus, Carl
Fagopyrum tataricum	Polygonum tataricum	1753	1790	(L.) Gaertn.	China North-Central, China South-Central, Tibet	Fruct. Sem. Pl. 2: 182 (1790)	1	L.	0	Linné, Carl von;Linnaeus, Carl
Fallopia convolvulus	Polygonum convolvulus	1753	1970	(L.) Á.Löve	Afghanistan, Albania, Algeria, Altay, Amur, Austria, Azores, Baleares, Baltic States, Belarus, Belgium, Bulgaria, Buryatiya, Canary Is., Central European Rus, China North-Central, China South-Central, China Southeast, Chita, Corse, Cyprus, Czechoslovakia, Denmark, East Aegean Is., East European Russia, East Himalaya, Egypt, Finland, France, Føroyar, Germany, Great Britain, Greece, Hungary, India,…	Taxon 19: 200 (1970)	0	L.	0	Linné, Carl von;Linnaeus, Carl
Festuca myuros		1753	1753	L.	Afghanistan, Albania, Algeria, Austria, Azores, Baleares, Belgium, Bulgaria, Canary Is., Cape Verde, China Southeast, Corse, Cyprus, Czechoslovakia, East Aegean Is., East Himalaya, Egypt, Eritrea, France, Germany, Great Britain, Greece, Hungary, India, Iran, Iraq, Ireland, Italy, Kazakhstan, Kenya, Kirgizstan, Korea, Kriti, Krym, Lebanon-Syria, Libya, Madeira, Morocco, Netherlands, North Caucasus…	Sp. Pl.: 74 (1753)	0	L.	0	Linné, Carl von;Linnaeus, Carl
Festuca ovina		1753	1753	L.	Afghanistan, Alaska, Alberta, Altay, Amur, Arizona, Austria, Baltic States, Belarus, British Columbia, Buryatiya, Central European Rus, China North-Central, China South-Central, China Southeast, Chita, Colorado, Czechoslovakia, Denmark, East European Russia, Finland, France, Føroyar, Germany, Great Britain, Hungary, Inner Mongolia, Iran, Ireland, Irkutsk, Italy, Japan, Khabarovsk, Korea, Krasnoya…	Sp. Pl.: 73 (1753)	0	L.	0	Linné, Carl von;Linnaeus, Carl
Festuca rubra		1753	1753	L.	Afghanistan, Alabama, Alaska, Albania, Alberta, Aleutian Is., Algeria, Altay, Amur, Arizona, Assam, Austria, Baltic States, Belarus, Belgium, British Columbia, Bulgaria, Buryatiya, California, Central European Rus, China North-Central, China South-Central, China Southeast, Chita, Connecticut, Corse, Czechoslovakia, Delaware, Denmark, District of Columbia, East European Russia, East Himalaya, Finl…	Sp. Pl.: 74 (1753)	0	L.	0	Linné, Carl von;Linnaeus, Carl
Ficus pumila		1753	1753	L.	China North-Central, China South-Central, China Southeast, Japan, Korea, Laos, Myanmar, Nansei-shoto, Ogasawara-shoto, Taiwan, Vietnam	Sp. Pl.: 1060 (1753)	0	L.	0	Linné, Carl von;Linnaeus, Carl
Ficus racemosa		1753	1753	L.	Andaman Is., Assam, Bangladesh, Borneo, Cambodia, China South-Central, China Southeast, East Himalaya, India, Jawa, Laos, Lesser Sunda Is., Malaya, Myanmar, Nepal, New Guinea, Northern Territory, Pakistan, Queensland, Sri Lanka, Sulawesi, Sumatera, Thailand, Vietnam, West Himalaya, Western Australia	Sp. Pl.: 1060 (1753)	0	L.	0	Linné, Carl von;Linnaeus, Carl
Filago arvensis		1753	1753	L.	Afghanistan, Albania, Altay, Austria, Baltic States, Belarus, Belgium, Bulgaria, Canary Is., Central European Rus, Corse, Cyprus, Czechoslovakia, Denmark, East Aegean Is., East European Russia, Finland, France, Germany, Great Britain, Greece, Hungary, Iran, Iraq, Italy, Kazakhstan, Kirgizstan, Kriti, Krym, Lebanon-Syria, Mongolia, Morocco, Netherlands, North Caucasus, North European Russi, Northw…	Sp. Pl.: 856 (1753)	0	L.	0	Linné, Carl von;Linnaeus, Carl
Filago pyramidata		1753	1753	L.	Afghanistan, Albania, Algeria, Azores, Baleares, Belgium, Bulgaria, Canary Is., Cape Verde, Corse, Cyprus, East Aegean Is., France, Germany, Great Britain, Greece, Gulf States, Iran, Iraq, Italy, Kazakhstan, Kirgizstan, Kriti, Krym, Kuwait, Lebanon-Syria, Libya, Madeira, Morocco, Netherlands, North Caucasus, Norway, Oman, Pakistan, Palestine, Portugal, Sardegna, Saudi Arabia, Sicilia, Spain, Swit…	Sp. Pl.: 1199 (1753)	0	L.	0	Linné, Carl von;Linnaeus, Carl
Filifolium sibiricum	Tanacetum sibiricum	1753	1940	(L.) Kitam.	Amur, Buryatiya, China North-Central, Chita, Inner Mongolia, Irkutsk, Japan, Khabarovsk, Korea, Manchuria, Mongolia, Primorye	Acta Phytotax. Geobot. 9: 157 (1940)	0	L.	0	Linné, Carl von;Linnaeus, Carl
Filipendula ulmaria	Spiraea ulmaria	1753	1879	(L.) Maxim.	Albania, Altay, Austria, Baltic States, Belarus, Belgium, Bulgaria, Buryatiya, Central European Rus, Czechoslovakia, Denmark, East European Russia, Finland, France, Germany, Great Britain, Greece, Hungary, Iceland, Iran, Ireland, Irkutsk, Italy, Kazakhstan, Kirgizstan, Krasnoyarsk, Krym, Mongolia, Netherlands, North Caucasus, North European Russi, Northwest European R, Norway, Poland, Portugal, P…	Trudy Imp. S.-Peterburgsk. Bot. Sada 6: 251 (1879)	0	L.	0	Linné, Carl von;Linnaeus, Carl
Fimbristylis dichotoma	Scirpus dichotomus	1753	1805	(L.) Vahl	Afghanistan, Alabama, Andaman Is., Angola, Argentina Northeast, Arizona, Arkansas, Assam, Bahamas, Bangladesh, Belize, Benin, Bismarck Archipelago, Bolivia, Botswana, Brazil North, Brazil Northeast, Brazil South, Brazil Southeast, Brazil West-Central, Burkina, Burundi, Cameroon, Cape Provinces, Caroline Is., Cayman Is., Central African Repu, Central American Pac, Chad, China North-Central, China …	Enum. Pl. Obs. 2: 287 (1805)	0	L.	0	Linné, Carl von;Linnaeus, Carl
Fimbristylis ferruginea	Scirpus ferrugineus	1753	1805	(L.) Vahl	Afghanistan, Aldabra, Algeria, Andaman Is., Angola, Assam, Bahamas, Bangladesh, Belize, Benin, Bismarck Archipelago, Borneo, Botswana, Burkina, Cape Provinces, Cayman Is., Chad, Congo, Cuba, Cyprus, Djibouti, Dominican Republic, East Aegean Is., Egypt, Equatorial Guinea, Eritrea, Ethiopia, French Guiana, Gabon, Gambia, Ghana, Guinea, Guinea-Bissau, Gulf of Guinea Is., Gulf States, Guyana, Haiti, …	Enum. Pl. Obs. 2: 291 (1805)	0	L.	0	Linné, Carl von;Linnaeus, Carl
Flagellaria indica		1753	1753	L.	Andaman Is., Assam, Bangladesh, Bismarck Archipelago, Borneo, Cambodia, Caroline Is., China Southeast, Fiji, Hainan, India, Japan, Jawa, Lesser Sunda Is., Madagascar, Malaya, Maldives, Maluku, Marianas, Mauritius, Mozambique, Myanmar, Nansei-shoto, New Caledonia, New Guinea, New South Wales, Nicobar Is., Norfolk Is., Northern Territory, Philippines, Queensland, Rodrigues, Réunion, Santa Cruz Is.,…	Sp. Pl.: 333 (1753)	0	L.	0	Linné, Carl von;Linnaeus, Carl
Flemingia strobilifera	Hedysarum strobiliferum	1753	1812	(L.) W.T.Aiton	Andaman Is., Assam, Bangladesh, Bismarck Archipelago, Borneo, Cambodia, China South-Central, China Southeast, East Himalaya, Hainan, India, Jawa, Laos, Lesser Sunda Is., Malaya, Maluku, Myanmar, Nansei-shoto, Nepal, New Guinea, Nicobar Is., Pakistan, Philippines, Sri Lanka, Sulawesi, Sumatera, Taiwan, Thailand, Vietnam, West Himalaya	Hortus Kew. 4: 350 (1812)	0	L.	0	Linné, Carl von;Linnaeus, Carl
Fragaria vesca		1753	1753	L.	Albania, Altay, Austria, Azores, Baltic States, Belarus, Belgium, Bulgaria, Buryatiya, Central European Rus, Corse, Czechoslovakia, Denmark, East European Russia, Finland, France, Germany, Great Britain, Greece, Hungary, Iceland, Iran, Ireland, Irkutsk, Italy, Kazakhstan, Kirgizstan, Krasnoyarsk, Krym, Lebanon-Syria, Madeira, Netherlands, North Caucasus, North European Russi, Northwest European R…	Sp. Pl.: 494 (1753)	0	L.	0	Linné, Carl von;Linnaeus, Carl
Frankenia pulverulenta		1753	1753	L.	Afghanistan, Albania, Algeria, Altay, Azores, Baleares, Bulgaria, Canary Is., Cape Provinces, China North-Central, Corse, Cyprus, East Aegean Is., Egypt, France, Free State, Greece, Gulf States, India, Inner Mongolia, Iran, Iraq, Italy, Kazakhstan, Kirgizstan, Kriti, Krym, Kuwait, Lebanon-Syria, Libya, Madeira, Mali, Mauritania, Mongolia, Morocco, Namibia, Niger, Northern Provinces, Oman, Pakista…	Sp. Pl.: 332 (1753)	0	L.	0	Linné, Carl von;Linnaeus, Carl
Gagea serotina	Bulbocodium serotinum	1753	1816	(L.) Ker Gawl.	Afghanistan, Alaska, Aleutian Is., Altay, Amur, Austria, British Columbia, Bulgaria, Buryatiya, China North-Central, China South-Central, Chita, Colorado, Czechoslovakia, East European Russia, East Himalaya, France, Germany, Great Britain, Idaho, Inner Mongolia, Irkutsk, Italy, Japan, Kamchatka, Kazakhstan, Khabarovsk, Kirgizstan, Korea, Krasnoyarsk, Kuril Is., Libya, Magadan, Manchuria, Mongolia…	J. Sci. Arts (London) 1: 180 (1816)	0	L.	0	Linné, Carl von;Linnaeus, Carl
Galatella villosa	Chrysocoma villosa	1753	1853	(L.) Rchb.f.	Altay, Bulgaria, Central European Rus, East European Russia, Hungary, Iraq, Kazakhstan, Krym, North Caucasus, Romania, South European Russi, Transcaucasus, Turkey, Ukraine, Uzbekistan, West Siberia, Xinjiang, Yugoslavia	Icon. Fl. Germ. Helv. 16: 8 (1853-1854)	0	L.	0	Linné, Carl von;Linnaeus, Carl
Galium aparine		1753	1753	L.	Afghanistan, Albania, Algeria, Altay, Austria, Azores, Baleares, Baltic States, Belarus, Belgium, Bulgaria, Buryatiya, Canary Is., Central European Rus, China North-Central, China South-Central, China Southeast, Chita, Corse, Cyprus, Czechoslovakia, Denmark, East Aegean Is., East European Russia, East Himalaya, Finland, France, Germany, Great Britain, Greece, Gulf States, Hungary, India, Iran, Ir…	Sp. Pl.: 108 (1753)	0	L.	0	Linné, Carl von;Linnaeus, Carl
Galium boreale		1753	1753	L.	Afghanistan, Alaska, Albania, Alberta, Altay, Amur, Arizona, Austria, Baltic States, Belarus, Belgium, British Columbia, Bulgaria, California, Central European Rus, China North-Central, China South-Central, Colorado, Connecticut, Czechoslovakia, Delaware, Denmark, East European Russia, Finland, France, Germany, Great Britain, Greenland, Hungary, Iceland, Idaho, Illinois, India, Indiana, Inner Mon…	Sp. Pl.: 108 (1753)	0	L.	0	Linné, Carl von;Linnaeus, Carl
Galium odoratum	Asperula odorata	1753	1771	(L.) Scop.	Albania, Algeria, Altay, Austria, Baltic States, Belarus, Belgium, Bulgaria, Central European Rus, China North-Central, China South-Central, Corse, Czechoslovakia, Denmark, East European Russia, Finland, France, Germany, Great Britain, Greece, Hungary, Inner Mongolia, Iran, Ireland, Italy, Japan, Korea, Krasnoyarsk, Krym, Manchuria, Netherlands, North Caucasus, North European Russi, Northwest Eur…	Fl. Carniol., ed. 2, 1: 105 (1771)	0	L.	0	Linné, Carl von;Linnaeus, Carl
Galium rubioides		1753	1753	L.	Altay, Amur, Austria, Baltic States, Belarus, Bulgaria, Buryatiya, Central European Rus, China North-Central, Chita, Czechoslovakia, East European Russia, Hungary, Irkutsk, Kazakhstan, Krym, Manchuria, North Caucasus, North European Russi, Northwest European R, Romania, South European Russi, Transcaucasus, Turkey, Ukraine, West Siberia, Xinjiang, Yugoslavia	Sp. Pl.: 105 (1753)	0	L.	0	Linné, Carl von;Linnaeus, Carl
Galium spurium		1753	1753	L.	Afghanistan, Albania, Alberta, Algeria, Altay, Austria, Baleares, Baltic States, Belarus, Belgium, Bulgaria, Burundi, Buryatiya, Canary Is., Cape Provinces, Central European Rus, Chad, China North-Central, China South-Central, China Southeast, Chita, Corse, Czechoslovakia, Denmark, East Aegean Is., East European Russia, Egypt, Eritrea, Ethiopia, France, Germany, Greece, Hungary, Illinois, Inner M…	Sp. Pl.: 106 (1753)	0	L.	0	Linné, Carl von;Linnaeus, Carl
Galium trifidum		1753	1753	L.	Alaska, Alberta, Aleutian Is., Altay, Arizona, Austria, Baltic States, British Columbia, Buryatiya, California, Central European Rus, China North-Central, China South-Central, China Southeast, Chita, Colorado, Connecticut, Dominican Republic, East European Russia, Finland, France, Greenland, Haiti, Iceland, Idaho, Illinois, Indiana, Inner Mongolia, Iowa, Irkutsk, Japan, Kamchatka, Kazakhstan, Kha…	Sp. Pl.: 105 (1753)	0	L.	0	Linné, Carl von;Linnaeus, Carl
Galium uliginosum		1753	1753	L.	Altay, Austria, Baltic States, Belarus, Belgium, Bulgaria, Buryatiya, Central European Rus, Chita, Czechoslovakia, Denmark, East European Russia, Finland, France, Germany, Great Britain, Hungary, Iceland, Ireland, Irkutsk, Italy, Kazakhstan, Krasnoyarsk, Mongolia, Morocco, Netherlands, North European Russi, Northwest European R, Norway, Poland, Romania, South European Russi, Spain, Sweden, Switze…	Sp. Pl.: 106 (1753)	0	L.	0	Linné, Carl von;Linnaeus, Carl
Galium verum		1753	1753	L.	Albania, Algeria, Altay, Austria, Baltic States, Belarus, Belgium, Bulgaria, Buryatiya, Central European Rus, China North-Central, China South-Central, China Southeast, Chita, Czechoslovakia, Denmark, East Aegean Is., East European Russia, Finland, France, Germany, Great Britain, Greece, Hungary, Iceland, Inner Mongolia, Iran, Iraq, Ireland, Irkutsk, Italy, Japan, Kamchatka, Kazakhstan, Kirgizsta…	Sp. Pl.: 107 (1753)	0	L.	0	Linné, Carl von;Linnaeus, Carl
Gentiana aquatica		1753	1753	L.	Afghanistan, Altay, Amur, Buryatiya, Chita, Iran, Irkutsk, Japan, Kazakhstan, Khabarovsk, Krasnoyarsk, Mongolia, Pakistan, Tadzhikistan, Transcaucasus, Turkey, Tuva, West Siberia, Xinjiang, Yakutskiya	Sp. Pl.: 229 (1753)	0	L.	0	Linné, Carl von;Linnaeus, Carl
Geranium pratense		1753	1753	L.	Altay, Amur, Austria, Baltic States, Belarus, Belgium, Bulgaria, Buryatiya, Central European Rus, China South-Central, Czechoslovakia, Denmark, East European Russia, Finland, France, Germany, Great Britain, Hungary, Inner Mongolia, Irkutsk, Italy, Kazakhstan, Kirgizstan, Krasnoyarsk, Mongolia, Nepal, Netherlands, North European Russi, Northwest European R, Norway, Pakistan, Poland, Qinghai, Roman…	Sp. Pl.: 681 (1753)	0	L.	0	Linné, Carl von;Linnaeus, Carl
Geranium robertianum		1753	1753	L.	Albania, Algeria, Altay, Austria, Azores, Baltic States, Belarus, Belgium, Bulgaria, Canary Is., Central European Rus, China South-Central, China Southeast, Corse, Cyprus, Czechoslovakia, Denmark, East European Russia, East Himalaya, Ethiopia, Finland, France, Germany, Great Britain, Greece, Hungary, Iran, Ireland, Italy, Kazakhstan, Kirgizstan, Kriti, Krym, Lebanon-Syria, Libya, Madeira, Morocco…	Sp. Pl.: 681 (1753)	0	L.	0	Linné, Carl von;Linnaeus, Carl
Geranium rotundifolium		1753	1753	L.	Afghanistan, Albania, Algeria, Austria, Azores, Baleares, Baltic States, Belarus, Belgium, Bulgaria, Canary Is., Corse, Cyprus, Czechoslovakia, East Aegean Is., Egypt, France, Germany, Great Britain, Greece, Hungary, India, Iran, Iraq, Ireland, Italy, Kazakhstan, Kirgizstan, Kriti, Krym, Lebanon-Syria, Libya, Madeira, Morocco, Northwest European R, Pakistan, Palestine, Portugal, Romania, Sardegna…	Sp. Pl.: 683 (1753)	0	L.	0	Linné, Carl von;Linnaeus, Carl
Geranium sibiricum		1753	1753	L.	Afghanistan, Altay, Amur, Baltic States, Buryatiya, Central European Rus, China North-Central, China South-Central, China Southeast, East European Russia, Inner Mongolia, Irkutsk, Japan, Kamchatka, Kazakhstan, Khabarovsk, Kirgizstan, Korea, Krasnoyarsk, Magadan, Manchuria, Mongolia, North Caucasus, Northwest European R, Pakistan, Qinghai, Romania, South European Russi, Tadzhikistan, Tibet, Transc…	Sp. Pl.: 683 (1753)	0	L.	0	Linné, Carl von;Linnaeus, Carl
Geum rivale		1753	1753	L.	Albania, Alberta, Altay, Austria, Baltic States, Belarus, Belgium, British Columbia, Bulgaria, Buryatiya, Central European Rus, Colorado, Czechoslovakia, Denmark, East European Russia, Finland, France, Føroyar, Germany, Great Britain, Greece, Iceland, Illinois, Iran, Ireland, Irkutsk, Italy, Kazakhstan, Kirgizstan, Krasnoyarsk, Labrador, Manitoba, Masachusettes, Michigan, Minnesota, Montana, Neth…	Sp. Pl.: 501 (1753)	0	L.	0	Linné, Carl von;Linnaeus, Carl
Glechoma hederacea		1753	1753	L.	Albania, Altay, Austria, Baltic States, Belarus, Belgium, Bulgaria, Central European Rus, Corse, Czechoslovakia, Denmark, East European Russia, Finland, France, Germany, Great Britain, Greece, Hungary, Ireland, Irkutsk, Italy, Kamchatka, Kazakhstan, Khabarovsk, Kirgizstan, Krasnoyarsk, Krym, Netherlands, North Caucasus, North European Russi, Northwest European R, Norway, Poland, Portugal, Primory…	Sp. Pl.: 578 (1753)	0	L.	0	Linné, Carl von;Linnaeus, Carl
Glinus lotoides		1753	1753	L.	Albania, Algeria, Angola, Bangladesh, Benin, Botswana, Bulgaria, Burkina, Burundi, Cambodia, Cameroon, Cape Provinces, Central African Repu, Chad, China South-Central, Congo, Cyprus, Djibouti, East Aegean Is., East Himalaya, Egypt, Eritrea, Ethiopia, Free State, Gambia, Ghana, Greece, Guinea, Guinea-Bissau, Hainan, India, Iran, Iraq, Italy, Ivory Coast, Jawa, Kenya, Kriti, KwaZulu-Natal, Laos, Le…	Sp. Pl.: 463 (1753)	0	L.	0	Linné, Carl von;Linnaeus, Carl
Glinus oppositifolius	Mollugo oppositifolia	1753	1901	(L.) Aug.DC.	Aldabra, Angola, Assam, Bangladesh, Benin, Borneo, Botswana, Burkina, Burundi, Cambodia, Cameroon, Cape Provinces, Chad, China Southeast, Congo, Ethiopia, Free State, Gabon, Ghana, Guinea, Guinea-Bissau, Hainan, India, Ivory Coast, Jawa, Kenya, KwaZulu-Natal, Laos, Lesser Sunda Is., Liberia, Malawi, Malaya, Mali, Maluku, Mauritania, Mozambique, Myanmar, Namibia, Nepal, New Guinea, New South Wales…	Bull. Herb. Boissier, sér. 2, 1: 559 (1901)	0	L.	0	Linné, Carl von;Linnaeus, Carl
Gloriosa superba		1753	1753	L.	Andaman Is., Angola, Assam, Bangladesh, Benin, Borneo, Botswana, Burkina, Burundi, Cabinda, Cambodia, Cameroon, Cape Provinces, Caprivi Strip, Central African Repu, Chad, China South-Central, Congo, East Himalaya, Equatorial Guinea, Ethiopia, Gabon, Ghana, Guinea, Guinea-Bissau, Gulf of Guinea Is., India, Ivory Coast, Jawa, Kenya, Laccadive Is., Laos, Lesser Sunda Is., Liberia, Madagascar, Malawi…	Sp. Pl.: 305 (1753)	0	L.	0	Linné, Carl von;Linnaeus, Carl
Glycine max	Phaseolus max	1753	1917	(L.) Merr.	China North-Central, China South-Central, China Southeast, Colombia, Ecuador, Galápagos, Hainan, Inner Mongolia, Japan, Laos, Manchuria, Qinghai, Taiwan, Thailand, Tibet, Vietnam, Xinjiang	Interpr. Herb. Amboin.: 274 (1917)	0	L.	0	Linné, Carl von;Linnaeus, Carl
Glycyrrhiza glabra		1753	1753	L.	Afghanistan, Albania, Bulgaria, Central European Rus, Cyprus, East Aegean Is., East European Russia, Greece, Iran, Iraq, Italy, Kazakhstan, Kirgizstan, Krym, Lebanon-Syria, Mongolia, North Caucasus, Pakistan, Palestine, Romania, Sardegna, Saudi Arabia, Sicilia, South European Russi, Tadzhikistan, Transcaucasus, Turkey, Turkmenistan, Ukraine, Uzbekistan, West Siberia, Xinjiang, Yugoslavia	Sp. Pl.: 742 (1753)	0	L.	0	Linné, Carl von;Linnaeus, Carl
Gnaphalium uliginosum		1753	1753	L.	Alaska, Albania, Alberta, Algeria, Altay, Amur, Austria, Baltic States, Belarus, Belgium, British Columbia, Bulgaria, Buryatiya, Central European Rus, China North-Central, Chita, Colorado, Connecticut, Corse, Czechoslovakia, Delaware, Denmark, East European Russia, Egypt, Finland, France, Germany, Great Britain, Greece, Greenland, Hungary, Iceland, Idaho, Illinois, Inner Mongolia, Iowa, Ireland, …	Sp. Pl.: 856 (1753)	0	L.	0	Linné, Carl von;Linnaeus, Carl
Goniolimon speciosum	Statice speciosa	1753	1848	(L.) Boiss.	Altay, Buryatiya, Chita, East European Russia, Inner Mongolia, Irkutsk, Kazakhstan, Krasnoyarsk, Mongolia, South European Russi, Tuva, West Siberia, Xinjiang, Yakutskiya	A.P.de Candolle, Prodr. 12: 634 (1848)	0	L.	0	Linné, Carl von;Linnaeus, Carl
Goodyera repens	Satyrium repens	1753	1813	(L.) R.Br.	Alaska, Alberta, Altay, Amur, Arizona, Assam, Austria, Baltic States, Belarus, British Columbia, Buryatiya, Central European Rus, China North-Central, China South-Central, China Southeast, Chita, Colorado, Connecticut, Czechoslovakia, Denmark, East European Russia, East Himalaya, Finland, France, Germany, Great Britain, Greece, Hungary, Idaho, Inner Mongolia, Iran, Irkutsk, Italy, Japan, Kamchatk…	W.T.Aiton, Hortus Kew. 5: 198 (1813)	0	L.	0	Linné, Carl von;Linnaeus, Carl
Grangea maderaspatana	Artemisia maderaspatana	1753	1812	(L.) Poir.	Angola, Bangladesh, Benin, Burkina, Cambodia, Chad, China South-Central, China Southeast, Congo, East Himalaya, Egypt, Ethiopia, Gabon, Ghana, Guinea-Bissau, Hainan, India, Jawa, Kenya, KwaZulu-Natal, Laos, Madagascar, Malaya, Mali, Mozambique, Myanmar, Namibia, Nepal, Nigeria, Pakistan, Philippines, Senegal, Sinai, Somalia, Sri Lanka, Sudan, Taiwan, Tanzania, Thailand, Vietnam, Zambia, Zaïre, Zi…	J.B.A.M.de Lamarck, Encycl., Suppl. 2: 825 (1812)	0	L.	0	Linné, Carl von;Linnaeus, Carl
Gratiola officinalis		1753	1753	L.	Albania, Altay, Austria, Baltic States, Belarus, Belgium, Bulgaria, Central European Rus, Czechoslovakia, East Aegean Is., East European Russia, France, Germany, Greece, Hungary, Iran, Italy, Kazakhstan, Krym, Morocco, Netherlands, Northwest European R, Poland, Portugal, Romania, Sardegna, South European Russi, Spain, Switzerland, Tadzhikistan, Transcaucasus, Turkey, Turkey-in-Europe, Ukraine, Uz…	Sp. Pl.: 17 (1753)	0	L.	0	Linné, Carl von;Linnaeus, Carl
Grona heterocarpa		1753	2018	(L.) H.Ohashi & K.Ohashi	Assam, Bangladesh, Borneo, Cambodia, China South-Central, China Southeast, Colombia, East Himalaya, Hainan, India, Japan, Korea, Laos, Malaya, Myanmar, Nansei-shoto, Nepal, New Caledonia, New Guinea, New South Wales, Nicaragua, Northern Territory, Philippines, Queensland, Samoa, Sri Lanka, Taiwan, Tanzania, Thailand, Tonga, Vanuatu, Vietnam, Wallis-Futuna Is., West Himalaya, Western Australia	J. Jap. Bot. 93: 112 (2018)	0	L.	0	Linné, Carl von;Linnaeus, Carl
Grona triflora	Hedysarum triflorum	1753	2018	(L.) H.Ohashi & K.Ohashi	Angola, Assam, Bangladesh, Belize, Benin, Bismarck Archipelago, Bolivia, Borneo, Brazil North, Brazil Northeast, Brazil South, Brazil Southeast, Brazil West-Central, Burundi, Cambodia, Cameroon, Caroline Is., Cayman Is., Central African Repu, China South-Central, China Southeast, Colombia, Congo, Costa Rica, Cuba, Dominican Republic, East Himalaya, El Salvador, Equatorial Guinea, Fiji, Florida, G…	J. Jap. Bot. 93: 117 (2018)	0	L.	0	Linné, Carl von;Linnaeus, Carl
Guettarda speciosa		1753	1753	L.	Aldabra, Andaman Is., Bangladesh, Bismarck Archipelago, Borneo, Caroline Is., Chagos Archipelago, China Southeast, Christmas I., Cocos (Keeling) Is., Cook Is., Fiji, Gilbert Is., Hainan, India, Jawa, Kenya, KwaZulu-Natal, Laccadive Is., Lesser Sunda Is., Line Is., Madagascar, Malaya, Maldives, Maluku, Marianas, Marquesas, Mozambique, Mozambique Channel I, Nansei-shoto, Nauru, New Caledonia, New G…	Sp. Pl.: 991 (1753)	0	L.	0	Linné, Carl von;Linnaeus, Carl
Guilandina bonduc		1753	1753	L.	Aldabra, Andaman Is., Assam, Bahamas, Bangladesh, Belize, Benin, Bermuda, Bismarck Archipelago, Borneo, Brazil North, Brazil Northeast, Brazil Southeast, Burkina, Cambodia, Cameroon, Cape Provinces, Cape Verde, Cayman Is., Central American Pac, Chagos Archipelago, China South-Central, China Southeast, Christmas I., Cocos (Keeling) Is., Colombia, Congo, Costa Rica, Cuba, Dominican Republic, East H…	Sp. Pl.: 381 (1753)	0	L.	0	Linné, Carl von;Linnaeus, Carl
Gymnadenia conopsea	Orchis conopsea	1753	1813	(L.) R.Br.	Albania, Altay, Amur, Austria, Baleares, Baltic States, Belarus, Belgium, Bulgaria, Buryatiya, Central European Rus, China North-Central, China South-Central, Chita, Czechoslovakia, Denmark, East European Russia, Finland, France, Germany, Great Britain, Greece, Hungary, Inner Mongolia, Iran, Ireland, Irkutsk, Italy, Japan, Khabarovsk, Korea, Krasnoyarsk, Krym, Kuril Is., Manchuria, Mongolia, Nepa…	W.T.Aiton, Hortus Kew. 5: 191 (1813)	0	L.	0	Linné, Carl von;Linnaeus, Carl
Gymnocarpium dryopteris	Polypodium dryopteris	1753	1851	(L.) Newman	Alaska, Albania, Alberta, Altay, Amur, Arizona, Austria, Baltic States, Belgium, British Columbia, Bulgaria, Buryatiya, Central European Rus, China North-Central, Chita, Colorado, Connecticut, Corse, Czechoslovakia, Denmark, East European Russia, Finland, France, Føroyar, Germany, Great Britain, Greece, Greenland, Hungary, Iceland, Idaho, Illinois, Inner Mongolia, Iowa, Ireland, Irkutsk, Italy, J…	Phytologist 4(App. XXIV): 371 (1851)	0	L.	0	Linné, Carl von;Linnaeus, Carl
Gynochthodes umbellata	Morinda umbellata	1753	2011	(L.) Razafim. & B.Bremer	Andaman Is., Assam, Bangladesh, Bismarck Archipelago, Borneo, Cambodia, China South-Central, China Southeast, Hainan, India, Japan, Jawa, Malaya, Marianas, Nansei-shoto, New Guinea, Philippines, Queensland, Samoa, Solomon Is., Sri Lanka, Sumatera, Taiwan, Thailand, Vietnam	Adansonia, sér. 3, 33: 296 (2011)	0	L.	0	Linné, Carl von;Linnaeus, Carl
Gynura divaricata	Senecio divaricatus	1753	1838	(L.) DC.	China South-Central, China Southeast, Hainan, Thailand, Vietnam	Prodr. 6: 301 (1838)	0	L.	0	Linné, Carl von;Linnaeus, Carl
Gynura pseudochina	Senecio pseudochina	1753	1838	(L.) DC.	Angola, Burundi, Cameroon, Central African Repu, China South-Central, China Southeast, East Himalaya, Ethiopia, Gabon, Ghana, Hainan, India, Jawa, Malawi, Myanmar, Nepal, Nigeria, Rwanda, Sierra Leone, Somalia, Sri Lanka, Thailand, Vietnam, Zambia, Zaïre	Prodr. 6: 299 (1838)	0	L.	0	Linné, Carl von;Linnaeus, Carl
Gypsophila altissima		1753	1753	L.	Altay, Buryatiya, Central European Rus, Chita, East European Russia, Irkutsk, Kazakhstan, Kirgizstan, Krasnoyarsk, Mongolia, North Caucasus, South European Russi, Tuva, Ukraine, West Siberia, Xinjiang	Sp. Pl.: 407 (1753)	0	L.	0	Linné, Carl von;Linnaeus, Carl
Gypsophila paniculata		1753	1753	L.	Altay, Austria, Belarus, Bulgaria, Central European Rus, Czechoslovakia, East European Russia, Hungary, Kazakhstan, Kirgizstan, Krym, Mongolia, Northwest European R, Poland, Romania, South European Russi, Tuva, Ukraine, West Siberia, Xinjiang, Yugoslavia	Sp. Pl.: 407 (1753)	0	L.	0	Linné, Carl von;Linnaeus, Carl
Gypsophila perfoliata		1753	1753	L.	Altay, Bulgaria, Iran, Iraq, Kazakhstan, Kirgizstan, Krym, Lebanon-Syria, Mongolia, North Caucasus, Romania, South European Russi, Tadzhikistan, Transcaucasus, Turkey, Turkmenistan, Tuva, Ukraine, Uzbekistan, Xinjiang	Sp. Pl.: 408 (1753)	0	L.	0	Linné, Carl von;Linnaeus, Carl
Halenia corniculata	Swertia corniculata	1753	1897	(L.) Cornaz	Altay, Amur, Buryatiya, China North-Central, Chita, East European Russia, Inner Mongolia, Irkutsk, Kamchatka, Kazakhstan, Khabarovsk, Korea, Krasnoyarsk, Kuril Is., Magadan, Manchuria, Mongolia, Primorye, Sakhalin, Tuva, West Siberia, Yakutskiya	Bull. Soc. Neuchateloise Sci. Nat. 25: 171 (1897)	0	L.	0	Linné, Carl von;Linnaeus, Carl
Haplophyllum dauricum	Peganum dauricum	1753	1831	(L.) G.Don	Buryatiya, China North-Central, Chita, Inner Mongolia, Manchuria, Mongolia, Xinjiang	Gen. Hist. 1: 781 (1831)	0	L.	0	Linné, Carl von;Linnaeus, Carl
Hedysarum alpinum		1753	1753	L.	Alberta, Altay, Amur, British Columbia, Buryatiya, Central European Rus, China North-Central, China South-Central, China Southeast, Chita, East European Russia, India, Inner Mongolia, Irkutsk, Kazakhstan, Khabarovsk, Korea, Krasnoyarsk, Labrador, Maine, Manchuria, Mongolia, Montana, Nebraska, Newfoundland, North European Russi, Pakistan, Rhode I., South Dakota, South European Russi, Tuva, Vermont…	Sp. Pl.: 750 (1753)	0	L.	0	Linné, Carl von;Linnaeus, Carl
Helichrysum arenarium	Gnaphalium arenarium	1753	1794	(L.) Moench	Altay, Austria, Baltic States, Belarus, Belgium, Bulgaria, Central European Rus, Czechoslovakia, Denmark, East European Russia, France, Germany, Hungary, Iran, Iraq, Kazakhstan, Krasnoyarsk, Krym, Lebanon-Syria, Mongolia, Netherlands, North Caucasus, Northwest European R, Norway, Poland, Romania, South European Russi, Sweden, Turkey, Ukraine, Uzbekistan, West Siberia, Xinjiang, Yugoslavia	Methodus: 575 (1794)	0	L.	0	Linné, Carl von;Linnaeus, Carl
Helichrysum luteoalbum	Gnaphalium luteoalbum	1753	1829	(L.) Rchb.	Afghanistan, Albania, Algeria, Angola, Antipodean Is., Austria, Azores, Baleares, Baltic States, Bangladesh, Belarus, Belgium, Benin, Botswana, Bulgaria, Burkina, Cameroon, Canary Is., Cape Provinces, Cape Verde, Central African Repu, Central European Rus, Chad, China North-Central, China South-Central, China Southeast, Corse, Cyprus, Czechoslovakia, Denmark, East Aegean Is., Egypt, Eritrea, Ethi…	Handb. Gewächsk., ed. 2, 2(2): 1460 (1829)	0	L.	0	Linné, Carl von;Linnaeus, Carl
Helicteres angustifolia		1753	1753	L.	Cambodia, China South-Central, China Southeast, Hainan, Laos, Malaya, Myanmar, Nansei-shoto, Philippines, Taiwan, Thailand, Vietnam	Sp. Pl.: 963 (1753)	0	L.	0	Linné, Carl von;Linnaeus, Carl
Helicteres isora		1753	1753	L.	Andaman Is., Bangladesh, Cambodia, China South-Central, Hainan, India, Laos, Malaya, Maluku, Myanmar, Nepal, Pakistan, Sri Lanka, Thailand, Vietnam	Sp. Pl.: 963 (1753)	0	L.	0	Linné, Carl von;Linnaeus, Carl
Helminthostachys zeylanica	Osmunda zeylanica	1753	1842	(L.) Hook.	Assam, Bangladesh, Bismarck Archipelago, Borneo, Cambodia, Caroline Is., China South-Central, China Southeast, East Himalaya, Hainan, India, Japan, Laos, Lesser Sunda Is., Malaya, Maluku, Marianas, Myanmar, Nansei-shoto, Nepal, New Caledonia, New Guinea, Nicobar Is., Northern Territory, Philippines, Queensland, Santa Cruz Is., Solomon Is., Sri Lanka, Sulawesi, Sumatera, Taiwan, Thailand, Vietnam,…	Gen. Fil.: t. 47B (1842)	0	L.	0	Linné, Carl von;Linnaeus, Carl
Hemerocallis fulva	Hemerocallis lilioasphodelus var. fulvus	1753	1762	(L.) L.	China North-Central, China South-Central, China Southeast, Japan, Korea, Nansei-shoto, Taiwan	Sp. Pl. ed. 2: 462 (1762)	0	L.	0	Linné, Carl von;Linnaeus, Carl
Hemerocallis lilioasphodelus		1753	1753	L.	Albania, Altay, Amur, China North-Central, China Southeast, Italy, Kazakhstan, Khabarovsk, Korea, Manchuria, Mongolia, Primorye, West Siberia, Yugoslavia	Sp. Pl.: 324 (1753)	0	L.	0	Linné, Carl von;Linnaeus, Carl
Hemionitis marantae	Acrostichum marantae	1753	2018	(L.) Christenh.	Albania, Algeria, Austria, Bulgaria, China South-Central, Corse, Cyprus, East Himalaya, Eritrea, Ethiopia, France, Greece, Hungary, Iran, Italy, Kenya, Krym, Lebanon-Syria, Morocco, Nepal, Portugal, Romania, Saudi Arabia, Spain, Switzerland, Tanzania, Tibet, Transcaucasus, Turkey, West Himalaya, Yemen, Yugoslavia	Global Fl. 4: 17 (2018)	0	L.	0	Linné, Carl von;Linnaeus, Carl
Heracleum sphondylium		1753	1753	L.	Albania, Austria, Belgium, Bulgaria, Czechoslovakia, Denmark, Finland, France, Germany, Great Britain, Greece, Hungary, Ireland, Italy, Morocco, Netherlands, Norway, Poland, Portugal, Romania, Sicilia, Spain, Tibet, Turkey-in-Europe, Ukraine, Yugoslavia	Sp. Pl.: 249 (1753)	0	L.	0	Linné, Carl von;Linnaeus, Carl
Herminium monorchis	Ophrys monorchis	1753	1813	(L.) R.Br.	Altay, Amur, Assam, Austria, Baltic States, Belarus, Belgium, Bulgaria, Buryatiya, Central European Rus, China North-Central, China South-Central, China Southeast, Chita, Czechoslovakia, Denmark, East European Russia, East Himalaya, Finland, France, Germany, Great Britain, Inner Mongolia, Irkutsk, Italy, Japan, Kazakhstan, Khabarovsk, Korea, Krasnoyarsk, Manchuria, Mongolia, Nepal, Netherlands, N…	W.T.Aiton, Hortus Kew. 5: 191 (1813)	0	L.	0	Linné, Carl von;Linnaeus, Carl
Herniaria glabra		1753	1753	L.	Afghanistan, Albania, Algeria, Altay, Austria, Baltic States, Belarus, Belgium, Bulgaria, Central European Rus, China South-Central, Corse, Czechoslovakia, Denmark, East European Russia, France, Germany, Great Britain, Greece, Hungary, Iran, Iraq, Italy, Kazakhstan, Kirgizstan, Krym, Lebanon-Syria, Libya, Mongolia, Morocco, Netherlands, Northwest European R, Palestine, Poland, Portugal, Romania, …	Sp. Pl.: 218 (1753)	0	L.	0	Linné, Carl von;Linnaeus, Carl
Hesperis sibirica		1753	1753	L.	Altay, Buryatiya, Central European Rus, China North-Central, East European Russia, Irkutsk, Japan, Kazakhstan, Kirgizstan, Krasnoyarsk, Manchuria, Mongolia, South European Russi, Tadzhikistan, Tuva, Ukraine, Uzbekistan, West Siberia, Xinjiang, Yakutskiya	Sp. Pl.: 663 (1753)	0	L.	0	Linné, Carl von;Linnaeus, Carl
Heteropogon contortus	Andropogon contortus	1753	1817	(L.) P.Beauv. ex Roem. & Schult.	Afghanistan, Albania, Algeria, Andaman Is., Angola, Argentina Northeast, Argentina Northwest, Arizona, Assam, Baleares, Bangladesh, Belize, Benin, Bolivia, Botswana, Brazil North, Burkina, Burundi, California, Cameroon, Canary Is., Cape Provinces, Cape Verde, Caprivi Strip, Central African Repu, Chad, China North-Central, China South-Central, China Southeast, Colombia, Cuba, Djibouti, Dominican R…	Syst. Veg., ed. 15 bis 2: 836 (1817)	0	L.	0	Linné, Carl von;Linnaeus, Carl
Hewittia malabarica	Convolvulus malabaricus	1753	1988	(L.) Suresh	Angola, Assam, Bangladesh, Benin, Borneo, Burundi, Cambodia, Cameroon, Cape Provinces, Central African Repu, Chad, China South-Central, China Southeast, Ethiopia, Gabon, Gambia, Ghana, Guinea, Hainan, India, Ivory Coast, Jawa, Kenya, KwaZulu-Natal, Laos, Lesser Sunda Is., Liberia, Madagascar, Malawi, Malaya, Mali, Maluku, Mozambique, Myanmar, New Guinea, Nigeria, Northern Provinces, Philippines, …	D.H.Nicolson, C.R.Suresh &amp; K.S.Manilal, Interpr. Van Rheedes Hort. Malab.: 88 (1988)	0	L.	0	Linné, Carl von;Linnaeus, Carl
Hibiscus mutabilis		1753	1753	L.	China South-Central, China Southeast, Taiwan	Sp. Pl.: 694 (1753)	1	L.	0	Linné, Carl von;Linnaeus, Carl
Hibiscus surattensis		1753	1753	L.	Angola, Assam, Bangladesh, Benin, Borneo, Burundi, Cambodia, Cameroon, Cape Verde, Central African Repu, China South-Central, China Southeast, Congo, East Himalaya, Ethiopia, Gabon, Gambia, Ghana, Guinea, Guinea-Bissau, Gulf of Guinea Is., Hainan, India, Ivory Coast, Kenya, Laos, Liberia, Malawi, Malaya, Mozambique, Myanmar, Nigeria, Northern Provinces, Philippines, Senegal, Sierra Leone, Sri Lan…	Sp. Pl.: 696 (1753)	0	L.	0	Linné, Carl von;Linnaeus, Carl
Hibiscus syriacus		1753	1753	L.	China South-Central, China Southeast	Sp. Pl.: 695 (1753)	1	L.	0	Linné, Carl von;Linnaeus, Carl
Hibiscus tiliaceus		1753	1753	L.	Aldabra, Andaman Is., Bangladesh, Bismarck Archipelago, Cabinda, Cambodia, Cameroon, Cape Provinces, China Southeast, Christmas I., Cocos (Keeling) Is., Congo, Cook Is., Fiji, Gabon, Gambia, Ghana, Gilbert Is., Guinea, Guinea-Bissau, Gulf of Guinea Is., Hainan, Ivory Coast, Japan, Kazan-retto, Kenya, Kermadec Is., KwaZulu-Natal, Laccadive Is., Laos, Lesser Sunda Is., Liberia, Malaya, Maldives, Mo…	Sp. Pl.: 694 (1753)	0	L.	0	Linné, Carl von;Linnaeus, Carl
Hieracium umbellatum		1753	1753	L.	Afghanistan, Alaska, Albania, Alberta, Altay, Amur, Austria, Baltic States, Belarus, British Columbia, Bulgaria, Central European Rus, China North-Central, China South-Central, China Southeast, Chita, Colorado, Connecticut, Czechoslovakia, Denmark, East European Russia, East Himalaya, Finland, France, Germany, Great Britain, Greenland, Hungary, Iceland, Idaho, Illinois, Indiana, Inner Mongolia, I…	Sp. Pl.: 804 (1753)	0	L.	0	Linné, Carl von;Linnaeus, Carl
Hippuris vulgaris		1753	1753	L.	Afghanistan, Alaska, Albania, Alberta, Aleutian Is., Altay, Amur, Argentina South, Arizona, Austria, Baltic States, Belarus, Belgium, British Columbia, Bulgaria, Buryatiya, California, Central European Rus, Chile Central, Chile South, China North-Central, China South-Central, China Southeast, Chita, Colorado, Czechoslovakia, Denmark, East European Russia, Finland, France, Føroyar, Germany, Great …	Sp. Pl.: 4 (1753)	0	L.	0	Linné, Carl von;Linnaeus, Carl
Hiptage benghalensis	Banisteria benghalensis	1753	1874	(L.) Kurz	Andaman Is., Bangladesh, Borneo, Cambodia, China South-Central, China Southeast, East Himalaya, Hainan, India, Jawa, Laos, Lesser Sunda Is., Malaya, Myanmar, Nepal, Nicobar Is., Philippines, Sri Lanka, Sulawesi, Sumatera, Taiwan, Thailand, Vietnam; Extinct in: Nansei-shoto	J. Asiat. Soc. Bengal, Pt. 2, Nat. Hist. 43: 136 (1874)	0	L.	0	Linné, Carl von;Linnaeus, Carl
Holosteum umbellatum		1753	1753	L.	Afghanistan, Albania, Algeria, Austria, Baltic States, Belarus, Belgium, Bulgaria, Corse, Cyprus, Czechoslovakia, Denmark, East Aegean Is., Ethiopia, France, Germany, Greece, Hungary, Iran, Iraq, Italy, Kazakhstan, Kirgizstan, Kriti, Krym, Lebanon-Syria, Morocco, Netherlands, Palestine, Poland, Portugal, Romania, Sardegna, Sicilia, South European Russi, Spain, Sweden, Switzerland, Tadzhikistan, T…	Sp. Pl.: 88 (1753)	0	L.	0	Linné, Carl von;Linnaeus, Carl
Hornungia procumbens	Lepidium procumbens	1753	1925	(L.) Hayek	Afghanistan, Algeria, Altay, Baleares, Canary Is., Cyprus, Egypt, France, Greece, Iran, Iraq, Italy, Kazakhstan, Kirgizstan, Kriti, Krym, Lebanon-Syria, Libya, Mongolia, Morocco, North Caucasus, Pakistan, Palestine, Portugal, Romania, Sicilia, South European Russi, Spain, Tadzhikistan, Transcaucasus, Tunisia, Turkey, Turkmenistan, Ukraine, Uzbekistan, Xinjiang, Yugoslavia; Extinct in: Bulgaria, G…	Repert. Spec. Nov. Regni Veg. Beih. 30(1): 480 (1925)	0	L.	0	Linné, Carl von;Linnaeus, Carl
Huangtcia renifolia	Hedysarum reniforme	1753	2018	(L.) H.Ohashi & K.Ohashi	Assam, Bangladesh, Cambodia, China South-Central, East Himalaya, Hainan, India, Jawa, Laos, Myanmar, Nepal, Taiwan, Thailand	J. Jap. Bot. 93: 183 (2018)	0	L.	0	Linné, Carl von;Linnaeus, Carl
Huperzia phlegmaria	Lycopodium phlegmaria	1753	1944	(L.) Rothm.	Andaman Is., Assam, Bangladesh, Bismarck Archipelago, Borneo, Cambodia, Cameroon, China South-Central, China Southeast, Christmas I., Comoros, East Himalaya, Equatorial Guinea, Gabon, Guinea, Gulf of Guinea Is., Hainan, India, Japan, Laos, Liberia, Madagascar, Malawi, Malaya, Maluku, Nansei-shoto, Nepal, New Guinea, Nicobar Is., Philippines, Queensland, Réunion, Sierra Leone, Solomon Is., Sri Lan…	Feddes Repert. Spec. Nov. Regni Veg. 54: 62 (1944)	0	L.	0	Linné, Carl von;Linnaeus, Carl
Huperzia selago	Lycopodium selago	1753	1829	(L.) Bernh. ex Schrank & Mart.	Alaska, Albania, Alberta, Altay, Austria, Baltic States, Belarus, Belgium, British Columbia, Bulgaria, Buryatiya, Central European Rus, Chita, Connecticut, Czechoslovakia, Denmark, East European Russia, Finland, France, Føroyar, Germany, Great Britain, Hungary, Iceland, Ireland, Irkutsk, Italy, Japan, Kamchatka, Kazakhstan, Khabarovsk, Korea, Krasnoyarsk, Kuril Is., Labrador, Madagascar, Maine, M…	Hort. Reg. Monac.: 3 (1829)	0	L.	0	Linné, Carl von;Linnaeus, Carl
Hydrocera triflora	Impatiens triflora	1753	1833	(L.) Wight & Arn.	Bangladesh, Cambodia, Hainan, India, Jawa, Laos, Malaya, Myanmar, Sri Lanka, Sulawesi, Sumatera, Thailand, Vietnam	R.Wight, Cat. Ind. Pl.: 28 (1833)	0	L.	0	Linné, Carl von;Linnaeus, Carl
Hydrolea zeylanica	Nama zeylanica	1753	1791	(L.) Vahl	Andaman Is., Assam, Bangladesh, Borneo, Cambodia, China South-Central, China Southeast, Hainan, India, Jawa, Laos, Malaya, Myanmar, Nepal, Philippines, Queensland, Sri Lanka, Sulawesi, Taiwan, Thailand, Vietnam	Symb. Bot. 2: 46 (1791)	0	L.	0	Linné, Carl von;Linnaeus, Carl
Hygrophila ringens	Ruellia ringens	1753	1825	(L.) R.Br. ex Spreng.	Andaman Is., Assam, Bangladesh, Cambodia, China South-Central, China Southeast, East Himalaya, Hainan, India, Korea, Laos, Malaya, Maldives, Myanmar, Nepal, Nicobar Is., Pakistan, Philippines, Sri Lanka, Taiwan, Thailand, Vietnam, West Himalaya	Syst. Veg. 2: 828 (1825)	0	L.	0	Linné, Carl von;Linnaeus, Carl
Hylotelephium telephium	Sedum telephium	1753	1977	(L.) H.Ohba	Altay, Amur, Austria, Baltic States, Belarus, Belgium, Buryatiya, Central European Rus, China North-Central, Chita, Czechoslovakia, East European Russia, France, Germany, Great Britain, Greece, Irkutsk, Italy, Kamchatka, Kazakhstan, Khabarovsk, Krasnoyarsk, Krym, Kuril Is., Magadan, Manchuria, Netherlands, North European Russi, Poland, Primorye, Romania, Sakhalin, South European Russi, Spain, Swi…	Bot. Mag. (Tokyo) 90: 53 (1977)	0	L.	0	Linné, Carl von;Linnaeus, Carl
Hylotelephium verticillatum	Sedum verticillatum	1753	1977	(L.) H.Ohba	China North-Central, China South-Central, China Southeast, Japan, Kamchatka, Korea, Kuril Is., Manchuria, Sakhalin	Bot. Mag. (Tokyo) 90: 54 (1977)	0	L.	0	Linné, Carl von;Linnaeus, Carl
Hyoscyamus niger		1753	1753	L.	Afghanistan, Albania, Algeria, Altay, Amur, Austria, Baltic States, Belarus, Belgium, Bulgaria, Buryatiya, Central European Rus, China North-Central, China South-Central, China Southeast, Chita, Corse, Czechoslovakia, Denmark, East Aegean Is., East European Russia, East Himalaya, Finland, France, Germany, Great Britain, Greece, Hungary, Inner Mongolia, Iran, Iraq, Ireland, Irkutsk, Italy, Japan, …	Sp. Pl.: 179 (1753)	0	L.	0	Linné, Carl von;Linnaeus, Carl
Hyoscyamus pusillus		1753	1753	L.	Afghanistan, Iran, Kazakhstan, Kirgizstan, Kuwait, Lebanon-Syria, Mongolia, Pakistan, Palestine, Saudi Arabia, Sinai, South European Russi, Tadzhikistan, Tibet, Transcaucasus, Turkey, Turkmenistan, Uzbekistan, Xinjiang	Sp. Pl.: 180 (1753)	0	L.	0	Linné, Carl von;Linnaeus, Carl
Hypecoum erectum		1753	1753	L.	Altay, Buryatiya, China North-Central, China South-Central, Chita, Inner Mongolia, Irkutsk, Krasnoyarsk, Manchuria, Mongolia, Tuva, West Siberia, Xinjiang	Sp. Pl.: 124 (1753)	0	L.	0	Linné, Carl von;Linnaeus, Carl
Hypecoum pendulum		1753	1753	L.	Afghanistan, Algeria, Baleares, Cyprus, East Aegean Is., Egypt, France, Greece, Iran, Iraq, Kazakhstan, Kirgizstan, Kuwait, Libya, Morocco, Pakistan, Palestine, Saudi Arabia, Sinai, Spain, Tadzhikistan, Transcaucasus, Tunisia, Turkey, Turkey-in-Europe, Turkmenistan, Uzbekistan, West Himalaya, Xinjiang, Yugoslavia	Sp. Pl.: 124 (1753)	0	L.	0	Linné, Carl von;Linnaeus, Carl
Hypericum ascyron		1753	1753	L.	Altay, Amur, Buryatiya, China North-Central, China South-Central, China Southeast, Chita, Connecticut, Hainan, Illinois, Indiana, Inner Mongolia, Iowa, Irkutsk, Japan, Kamchatka, Kansas, Kazakhstan, Khabarovsk, Korea, Krasnoyarsk, Kuril Is., Maine, Manchuria, Maryland, Masachusettes, Michigan, Minnesota, Missouri, Mongolia, New Hampshire, New York, Ohio, Ontario, Pennsylvania, Primorye, Qinghai, …	Sp. Pl.: 783 (1753)	0	L.	0	Linné, Carl von;Linnaeus, Carl
Hypericum hirsutum		1753	1753	L.	Albania, Algeria, Altay, Austria, Baltic States, Belarus, Belgium, Bulgaria, Central European Rus, Czechoslovakia, Denmark, East European Russia, Finland, France, Germany, Great Britain, Greece, Iran, Ireland, Italy, Kazakhstan, Kirgizstan, Krasnoyarsk, Netherlands, North Caucasus, Norway, Poland, Romania, Spain, Sweden, Switzerland, Transcaucasus, Turkey, Ukraine, West Siberia, Xinjiang, Yugosla…	Sp. Pl.: 786 (1753)	0	L.	0	Linné, Carl von;Linnaeus, Carl
Hypericum perforatum		1753	1753	L.	Afghanistan, Albania, Algeria, Altay, Austria, Azores, Baleares, Baltic States, Belarus, Belgium, Bulgaria, Canary Is., Central European Rus, China North-Central, China South-Central, China Southeast, Corse, Cyprus, Czechoslovakia, Denmark, East Aegean Is., East European Russia, Finland, France, Germany, Great Britain, Greece, Hungary, Iran, Iraq, Ireland, Italy, Kazakhstan, Kirgizstan, Krasnoyar…	Sp. Pl.: 785 (1753)	0	L.	0	Linné, Carl von;Linnaeus, Carl
Hypertelis cerviana	Pharnaceum cervianum	1753	2016	(L.) Thulin	Albania, Algeria, Angola, Bangladesh, Benin, Botswana, Bulgaria, Burkina, Cape Provinces, Cape Verde, Caprivi Strip, Central European Rus, Chad, China North-Central, Djibouti, East Aegean Is., Ecuador, Eritrea, Free State, Gambia, Ghana, Greece, Guinea, India, Iran, Italy, Kazakhstan, Kenya, Krym, Lesotho, Mali, Mauritania, Mexico Northeast, Mexico Northwest, Mexico Southwest, Mongolia, Morocco, …	Taxon 65: 787 (2016)	0	L.	0	Linné, Carl von;Linnaeus, Carl
Hypochaeris maculata		1753	1753	L.	Albania, Altay, Austria, Baltic States, Belarus, Belgium, Bulgaria, Buryatiya, Central European Rus, Czechoslovakia, Denmark, East European Russia, Finland, France, Germany, Great Britain, Greece, Hungary, Irkutsk, Italy, Kazakhstan, Krasnoyarsk, Mongolia, North Caucasus, North European Russi, Northwest European R, Norway, Poland, Romania, South European Russi, Spain, Sweden, Switzerland, Tuva, U…	Sp. Pl.: 810 (1753)	0	L.	0	Linné, Carl von;Linnaeus, Carl
Hypoestes purpurea	Justicia purpurea	1753	1824	(L.) R.Br.	China Southeast, Hainan, Laos, Philippines, Taiwan	Prodr. Fl. Nov. Holland. 1: 474 (1824)	0	L.	0	Linné, Carl von;Linnaeus, Carl
Ichnocarpus frutescens	Apocynum frutescens	1753	1811	(L.) W.T.Aiton	Andaman Is., Assam, Bangladesh, Bismarck Archipelago, Borneo, Cambodia, China South-Central, China Southeast, East Himalaya, Hainan, India, Jawa, Laos, Lesser Sunda Is., Malaya, Maluku, Myanmar, Nepal, New Guinea, Nicobar Is., Northern Territory, Pakistan, Philippines, Queensland, Sri Lanka, Sulawesi, Sumatera, Thailand, Vietnam, West Himalaya, Western Australia	Hortus Kew. 2: 69 (1811)	0	L.	0	Linné, Carl von;Linnaeus, Carl
Impatiens chinensis		1753	1753	L.	Bangladesh, China South-Central, China Southeast, East Himalaya, Hainan, India, Laos, Malaya, Myanmar, Sri Lanka, Thailand, Vietnam	Sp. Pl.: 937 (1753)	0	L.	0	Linné, Carl von;Linnaeus, Carl
Impatiens noli-tangere		1753	1753	L.	Albania, Altay, Amur, Austria, Baltic States, Belarus, Belgium, Bulgaria, Buryatiya, Central European Rus, China North-Central, China South-Central, China Southeast, Chita, Czechoslovakia, Denmark, East European Russia, East Himalaya, Finland, France, Germany, Great Britain, Greece, Hungary, Inner Mongolia, Iran, Irkutsk, Italy, Japan, Kamchatka, Kazakhstan, Khabarovsk, Korea, Krasnoyarsk, Kuril …	Sp. Pl.: 938 (1753)	0	L.	0	Linné, Carl von;Linnaeus, Carl
Indigofera hirsuta		1753	1753	L.	Angola, Assam, Bangladesh, Benin, Bismarck Archipelago, Bolivia, Borneo, Botswana, Brazil North, Brazil Northeast, Brazil South, Brazil Southeast, Brazil West-Central, Burkina, Burundi, Cambodia, Cameroon, Cape Verde, Central African Repu, Chad, China South-Central, China Southeast, Christmas I., Cocos (Keeling) Is., Comoros, Congo, Ecuador, Equatorial Guinea, Ethiopia, Free State, French Guiana,…	Sp. Pl.: 751 (1753)	0	L.	0	Linné, Carl von;Linnaeus, Carl
Indigofera nummulariifolia	Hedysarum nummulariifolium	1753	1931	(L.) Livera ex Alston	Angola, Benin, Botswana, Burkina, Cambodia, Cameroon, Central African Repu, Chad, Ghana, Guinea, Guinea-Bissau, Hainan, India, Ivory Coast, Madagascar, Malawi, Mali, Mozambique, Namibia, Niger, Nigeria, Senegal, Somalia, South China Sea, Sri Lanka, Sudan, Taiwan, Tanzania, Thailand, Togo, Vietnam, Zambia, Zaïre, Zimbabwe	H.Trimen, Handb. Fl. Ceylon 6(Suppl.): 72 (1931)	0	L.	0	Linné, Carl von;Linnaeus, Carl
Inula helenium		1753	1753	L.	Albania, Altay, Austria, Baltic States, Belarus, Belgium, Bulgaria, Central European Rus, Czechoslovakia, Denmark, East European Russia, Finland, France, Germany, Great Britain, Greece, Hungary, Iran, Iraq, Ireland, Italy, Kazakhstan, Kirgizstan, Krym, Netherlands, North Caucasus, North European Russi, Northwest European R, Norway, Poland, Romania, South European Russi, Spain, Sweden, Switzerland…	Sp. Pl.: 881 (1753)	0	L.	0	Linné, Carl von;Linnaeus, Carl
Ipomoea campanulata		1753	1753	L.	Andaman Is., Bangladesh, Borneo, Cambodia, China South-Central, India, Jawa, Laos, Lesser Sunda Is., Malaya, Maluku, Myanmar, New Guinea, Philippines, Solomon Is., Sri Lanka, Sulawesi, Sumatera, Thailand, Vietnam	Sp. Pl.: 160 (1753)	0	L.	0	Linné, Carl von;Linnaeus, Carl
Ipomoea pes-caprae	Convolvulus pes-caprae	1753	1818	(L.) R.Br.	Alabama, Aldabra, Angola, Aruba, Bahamas, Bangladesh, Belize, Benin, Bermuda, Borneo, Brazil North, Brazil Northeast, Brazil South, Brazil Southeast, Burundi, Cambodia, Cameroon, Canary Is., Cape Provinces, Cape Verde, Caroline Is., Cayman Is., Central American Pac, China Southeast, Christmas I., Cocos (Keeling) Is., Colombia, Comoros, Congo, Cook Is., Costa Rica, Cuba, Djibouti, Dominican Republ…	J.H.Tuckey, Narr. Exped. Zaire: 477 (1818)	0	L.	0	Linné, Carl von;Linnaeus, Carl
Ipomoea pes-tigridis		1753	1753	L.	Angola, Bangladesh, Benin, Borneo, Botswana, Cambodia, Caprivi Strip, Chad, China South-Central, China Southeast, East Himalaya, Guinea-Bissau, Hainan, India, Jawa, Kenya, Lesser Sunda Is., Malawi, Malaya, Mali, Maluku, Mauritius, Mozambique, Myanmar, Namibia, Nepal, New Guinea, Niger, Nigeria, Northern Provinces, Pakistan, Philippines, Somalia, South China Sea, Sri Lanka, Sudan, Sulawesi, Sumate…	Sp. Pl.: 162 (1753)	0	L.	0	Linné, Carl von;Linnaeus, Carl
Ipomoea violacea		1753	1753	L.	Aldabra, Andaman Is., Aruba, Assam, Bahamas, Bangladesh, Belize, Cambodia, Caroline Is., Cayman Is., China Southeast, Christmas I., Cocos (Keeling) Is., Colombia, Comoros, Cook Is., Cuba, Dominican Republic, Fiji, Florida, French Guiana, Ghana, Gilbert Is., Guyana, Hainan, Haiti, India, Jamaica, Japan, Kenya, Leeward Is., Line Is., Madagascar, Malaya, Maluku, Marianas, Marquesas, Marshall Is., Ma…	Sp. Pl.: 161 (1753)	0	L.	0	Linné, Carl von;Linnaeus, Carl
Iris domestica	Epidendrum domesticum	1753	2005	(L.) Goldblatt & Mabb.	Bangladesh, China North-Central, China South-Central, China Southeast, East Himalaya, Hainan, India, Inner Mongolia, Japan, Korea, Malaya, Manchuria, Myanmar, Nepal, Philippines, Primorye, Taiwan, Tibet, Vietnam, West Himalaya	Novon 15: 129 (2005)	0	L.	0	Linné, Carl von;Linnaeus, Carl
Ischaemum aristatum		1753	1753	L.	Borneo, Caroline Is., China North-Central, China South-Central, China Southeast, Fiji, Hainan, Japan, Korea, Manchuria, Nansei-shoto, Niue, Samoa, Solomon Is., Taiwan, Vietnam	Sp. Pl.: 1049 (1753)	0	L.	0	Linné, Carl von;Linnaeus, Carl
Ischaemum muticum		1753	1753	L.	Andaman Is., Bangladesh, Bismarck Archipelago, Borneo, Cambodia, Caroline Is., Christmas I., Cocos (Keeling) Is., India, Japan, Jawa, Laccadive Is., Lesser Sunda Is., Malaya, Maldives, Maluku, Myanmar, Nansei-shoto, New Caledonia, New Guinea, Nicobar Is., Philippines, Queensland, Solomon Is., Sri Lanka, Sulawesi, Sumatera, Taiwan, Thailand, Vanuatu, Vietnam	Sp. Pl.: 1049 (1753)	0	L.	0	Linné, Carl von;Linnaeus, Carl
Isolepis setacea	Scirpus setaceus	1753	1810	(L.) R.Br.	Afghanistan, Albania, Algeria, Assam, Austria, Azores, Baltic States, Belarus, Belgium, Bulgaria, Cameroon, Cape Provinces, Central European Rus, China North-Central, China South-Central, China Southeast, Corse, Czechoslovakia, Denmark, East European Russia, East Himalaya, Egypt, Ethiopia, France, Free State, Føroyar, Germany, Great Britain, Greece, Gulf of Guinea Is., Hungary, Iceland, Inner Mon…	Prodr. Fl. Nov. Holland.: 222 (1810)	0	L.	0	Linné, Carl von;Linnaeus, Carl
Jasminum officinale		1753	1753	L.	Afghanistan, Bangladesh, China South-Central, East Himalaya, Iran, Nepal, Pakistan, Tadzhikistan, Tibet, Transcaucasus, Turkey, West Himalaya	Sp. Pl.: 7 (1753)	0	L.	0	Linné, Carl von;Linnaeus, Carl
Juncus articulatus		1753	1753	L.	Afghanistan, Alaska, Albania, Algeria, Altay, Amur, Arizona, Austria, Azores, Baleares, Baltic States, Belarus, Belgium, British Columbia, Bulgaria, Buryatiya, Canary Is., Central European Rus, China North-Central, China South-Central, China Southeast, Chita, Colorado, Connecticut, Corse, Cyprus, Czechoslovakia, Denmark, East Aegean Is., East European Russia, East Himalaya, Finland, France, Føroy…	Sp. Pl.: 327 (1753)	0	L.	0	Linné, Carl von;Linnaeus, Carl
Juncus bufonius		1753	1753	L.	Afghanistan, Alabama, Alaska, Albania, Alberta, Algeria, Altay, Amur, Argentina Northeast, Argentina Northwest, Argentina South, Arizona, Arkansas, Assam, Austria, Azores, Bahamas, Baleares, Baltic States, Bangladesh, Belarus, Belgium, Bolivia, Borneo, Brazil South, British Columbia, Bulgaria, Buryatiya, California, Canary Is., Cape Provinces, Central European Rus, Chad, Chile Central, Chile Nort…	Sp. Pl.: 328 (1753)	0	L.	0	Linné, Carl von;Linnaeus, Carl
Juncus effusus		1753	1753	L.	Afghanistan, Alabama, Alaska, Albania, Algeria, Altay, Arizona, Arkansas, Austria, Azores, Baleares, Baltic States, Belarus, Belgium, Bolivia, British Columbia, Bulgaria, Burundi, California, Cambodia, Canary Is., Central European Rus, China North-Central, China South-Central, China Southeast, Colombia, Connecticut, Corse, Costa Rica, Cyprus, Czechoslovakia, Delaware, Denmark, District of Columbi…	Sp. Pl.: 326 (1753)	0	L.	0	Linné, Carl von;Linnaeus, Carl
Juncus filiformis		1753	1753	L.	Alaska, Alberta, Altay, Austria, Baltic States, Belarus, Belgium, British Columbia, Bulgaria, Buryatiya, Central European Rus, Chita, Colorado, Czechoslovakia, Denmark, East European Russia, Finland, France, Germany, Great Britain, Greece, Greenland, Iceland, Irkutsk, Italy, Japan, Kamchatka, Khabarovsk, Krasnoyarsk, Kuril Is., Magadan, Manchuria, Manitoba, Minnesota, Netherlands, New York, North…	Sp. Pl.: 326 (1753)	0	L.	0	Linné, Carl von;Linnaeus, Carl
Juncus inflexus		1753	1753	L.	Afghanistan, Albania, Algeria, Assam, Austria, Baleares, Baltic States, Belarus, Belgium, Bulgaria, Canary Is., Cape Provinces, Central European Rus, China North-Central, China South-Central, China Southeast, Corse, Cyprus, Czechoslovakia, Denmark, East Aegean Is., East European Russia, East Himalaya, France, Free State, Germany, Great Britain, Greece, Hungary, India, Iran, Iraq, Ireland, Italy, …	Sp. Pl.: 326 (1753)	0	L.	0	Linné, Carl von;Linnaeus, Carl
Juncus triglumis		1753	1753	L.	Alaska, Alberta, Aleutian Is., Altay, Austria, British Columbia, Bulgaria, Buryatiya, China North-Central, China South-Central, Chita, Colorado, Czechoslovakia, East European Russia, East Himalaya, Finland, France, Føroyar, Germany, Great Britain, Greenland, Iceland, Idaho, Irkutsk, Italy, Japan, Kamchatka, Khabarovsk, Kirgizstan, Korea, Krasnoyarsk, Kuril Is., Labrador, Magadan, Manitoba, Mongol…	Sp. Pl.: 328 (1753)	0	L.	0	Linné, Carl von;Linnaeus, Carl
Juniperus communis		1753	1753	L.	Afghanistan, Alabama, Alaska, Albania, Algeria, Altay, Amur, Arizona, Austria, Baltic States, Belarus, Belgium, British Columbia, Bulgaria, Buryatiya, California, Central European Rus, Chita, Colorado, Connecticut, Corse, Cyprus, Czechoslovakia, Denmark, East Aegean Is., East European Russia, Finland, France, Føroyar, Georgia, Germany, Great Britain, Greece, Greenland, Hungary, Iceland, Idaho, Il…	Sp. Pl.: 1040 (1753)	0	L.	0	Linné, Carl von;Linnaeus, Carl
Juniperus sabina		1753	1753	L.	Albania, Algeria, Altay, Amur, Austria, Bulgaria, China North-Central, Chita, Czechoslovakia, East European Russia, France, Germany, Greece, Inner Mongolia, Italy, Kazakhstan, Khabarovsk, Kirgizstan, Korea, Krym, Manchuria, Mongolia, North Caucasus, Poland, Primorye, Qinghai, South European Russi, Spain, Switzerland, Transcaucasus, Turkey, Tuva, Ukraine, West Siberia, Xinjiang, Yugoslavia	Sp. Pl.: 1039 (1753)	0	L.	0	Linné, Carl von;Linnaeus, Carl
Jurinea multiflora	Serratula multiflora	1753	1911	(L.) B.Fedtsch.	Altay, Central European Rus, East European Russia, Iran, Kazakhstan, Krym, Mongolia, North Caucasus, Romania, South European Russi, Transcaucasus, Turkey, Ukraine, West Siberia, Xinjiang	Consp. Fl. Turkest. 4: 295 (1911)	0	L.	0	Linné, Carl von;Linnaeus, Carl
Kadsura japonica	Uvaria japonica	1753	1817	(L.) Dunal	Japan, Korea, Nansei-shoto, Taiwan	Monogr. Anonac.: 57 (1817)	0	L.	0	Linné, Carl von;Linnaeus, Carl
Kaempferia galanga		1753	1753	L.	Assam, Bangladesh, Cambodia, China South-Central, India, Myanmar, Thailand, Vietnam	Sp. Pl.: 3 (1753)	0	L.	0	Linné, Carl von;Linnaeus, Carl
Kaempferia rotunda		1753	1753	L.	Assam, Bangladesh, China South-Central, China Southeast, East Himalaya, Hainan, India, Myanmar, Nepal, Taiwan, Thailand, Vietnam, West Himalaya	Sp. Pl.: 3 (1753)	0	L.	0	Linné, Carl von;Linnaeus, Carl
Kalidium caspicum	Salicornia caspica	1753	1876	(L.) Ung.-Sternb.	Afghanistan, Iran, Kazakhstan, Kirgizstan, South European Russi, Tadzhikistan, Turkey, Turkmenistan, Uzbekistan, Xinjiang	Atti Congr. Int. Bot. Firenze 1874: 317 (1876)	0	L.	0	Linné, Carl von;Linnaeus, Carl
Klasea centauroides		1753	1947	(L.) Kitag.	Buryatiya, China North-Central, Chita, Inner Mongolia, Irkutsk, Krasnoyarsk, Manchuria, Mongolia, Tuva	J. Jap. Bot. 21: 138 (1947)	0	L.	0	Linné, Carl von;Linnaeus, Carl
Koenigia divaricata	Polygonum divaricatum	1753	2015	(L.) T.M.Schust. & Reveal	Altay, Amur, Buryatiya, Central European Rus, China North-Central, Chita, Inner Mongolia, Irkutsk, Khabarovsk, Korea, Manchuria, Mongolia, Northwest European R, Primorye, West Siberia, Yakutskiya	Taxon 64: 1201 (2015)	0	L.	0	Linné, Carl von;Linnaeus, Carl
Koenigia ocreata	Polygonum ocreatum	1753	2015	(L.) T.M.Schust. & Reveal	Amur, Buryatiya, Chita, Inner Mongolia, Irkutsk, Kamchatka, Khabarovsk, Krasnoyarsk, Magadan, Manchuria, Mongolia, North European Russi, Primorye, Sakhalin, West Siberia, Yakutskiya	Taxon 64: 1202 (2015)	0	L.	0	Linné, Carl von;Linnaeus, Carl
Krascheninnikovia ceratoides	Axyris ceratoides	1753	1772	(L.) Gueldenst.	Afghanistan, Altay, Austria, Buryatiya, Central European Rus, China North-Central, China South-Central, Egypt, Hungary, Inner Mongolia, Iran, Iraq, Irkutsk, Kazakhstan, Kirgizstan, Krasnoyarsk, Krym, Manchuria, Mongolia, Morocco, Nepal, Pakistan, Qinghai, Romania, Sinai, South European Russi, Spain, Tadzhikistan, Tibet, Transcaucasus, Turkey, Turkmenistan, Tuva, Ukraine, Uzbekistan, West Himalaya…	Novi Comment. Acad. Sci. Imp. Petrop. 16: 555 (1772)	0	L.	0	Linné, Carl von;Linnaeus, Carl
Lactuca sibirica	Sonchus sibiricus	1753	1874	(L.) Benth. ex Maxim.	Altay, Amur, Baltic States, Belarus, Buryatiya, Central European Rus, China North-Central, Chita, East European Russia, Finland, Inner Mongolia, Irkutsk, Japan, Kamchatka, Kazakhstan, Khabarovsk, Korea, Krasnoyarsk, Kuril Is., Magadan, Manchuria, Mongolia, North European Russi, Northwest European R, Norway, Primorye, Qinghai, Sakhalin, Sweden, Tuva, Ukraine, West Siberia, Xinjiang, Yakutskiya	Bull. Acad. Imp. Sci. Saint-Pétersbourg xix. 528 (1874)	0	L.	0	Linné, Carl von;Linnaeus, Carl
Lamium album		1753	1753	L.	Afghanistan, Altay, Amur, Austria, Baltic States, Belarus, Belgium, Bulgaria, Buryatiya, Central European Rus, China North-Central, China South-Central, Chita, Czechoslovakia, Denmark, East European Russia, Finland, France, Germany, Great Britain, Hungary, Inner Mongolia, Iran, Iraq, Irkutsk, Italy, Japan, Kamchatka, Kazakhstan, Khabarovsk, Kirgizstan, Korea, Krasnoyarsk, Krym, Kuril Is., Manchur…	Sp. Pl.: 579 (1753)	0	L.	0	Linné, Carl von;Linnaeus, Carl
Lamium amplexicaule		1753	1753	L.	Afghanistan, Albania, Algeria, Austria, Azores, Baleares, Baltic States, Belarus, Belgium, Bulgaria, Canary Is., Central European Rus, China North-Central, China South-Central, China Southeast, Corse, Cyprus, Czechoslovakia, Denmark, East Aegean Is., East European Russia, East Himalaya, Egypt, Ethiopia, Finland, France, Germany, Great Britain, Greece, Hungary, Iran, Iraq, Ireland, Irkutsk, Italy,…	Sp. Pl.: 579 (1753)	0	L.	0	Linné, Carl von;Linnaeus, Carl
Laportea interrupta	Urtica interrupta	1753	1965	(L.) Chew	Andaman Is., Bangladesh, Cambodia, Cameroon, China South-Central, Ethiopia, Guinea-Bissau, India, Kenya, Laccadive Is., Laos, Malaya, Maldives, Maluku, Mozambique, Myanmar, Northern Territory, Oman, Philippines, Queensland, Solomon Is., Sri Lanka, Sudan, Taiwan, Tanzania, Thailand, Vietnam	Gard. Bull. Singapore 21: 200 (1965)	0	L.	0	Linné, Carl von;Linnaeus, Carl
Lasia spinosa	Dracontium spinosum	1753	1864	(L.) Thwaites	Assam, Bangladesh, Borneo, Cambodia, China South-Central, China Southeast, East Himalaya, Hainan, India, Jawa, Laos, Malaya, Myanmar, Nepal, New Guinea, Sri Lanka, Sumatera, Taiwan, Thailand, Tibet, Vietnam; Doubtfully present in: Maluku, Sulawesi	Enum. Pl. Zeyl.: 336 (1864)	0	L.	0	Linné, Carl von;Linnaeus, Carl
Lathyrus palustris		1753	1753	L.	Albania, Aleutian Is., Altay, Amur, Austria, Baltic States, Belarus, Belgium, Bulgaria, Buryatiya, California, Central European Rus, China North-Central, China South-Central, China Southeast, Chita, Czechoslovakia, Denmark, East European Russia, Finland, France, Georgia, Germany, Great Britain, Hungary, Iceland, Illinois, Indiana, Inner Mongolia, Iowa, Ireland, Irkutsk, Italy, Kamchatka, Kazakhst…	Sp. Pl.: 733 (1753)	0	L.	0	Linné, Carl von;Linnaeus, Carl
Lathyrus pisiformis		1753	1753	L.	Altay, Baltic States, Belarus, Buryatiya, Central European Rus, Czechoslovakia, East European Russia, Hungary, Irkutsk, Kazakhstan, Kirgizstan, Krasnoyarsk, Mongolia, North Caucasus, North European Russi, Northwest European R, Poland, South European Russi, Tuva, Ukraine, West Siberia, Xinjiang, Yakutskiya	Sp. Pl.: 734 (1753)	0	L.	0	Linné, Carl von;Linnaeus, Carl
Lathyrus pratensis		1753	1753	L.	Afghanistan, Albania, Altay, Austria, Baltic States, Belarus, Belgium, Bulgaria, Buryatiya, Central European Rus, China North-Central, China South-Central, Chita, Corse, Czechoslovakia, Denmark, East Aegean Is., East European Russia, Ethiopia, Finland, France, Føroyar, Germany, Great Britain, Greece, Hungary, Iceland, India, Iran, Iraq, Ireland, Italy, Kazakhstan, Kirgizstan, Krasnoyarsk, Krym, L…	Sp. Pl.: 733 (1753)	0	L.	0	Linné, Carl von;Linnaeus, Carl
Lathyrus tuberosus		1753	1753	L.	Albania, Altay, Austria, Baltic States, Belarus, Belgium, Bulgaria, Buryatiya, Central European Rus, Czechoslovakia, East European Russia, France, Germany, Greece, Hungary, Iran, Irkutsk, Italy, Kazakhstan, Kirgizstan, Krasnoyarsk, Krym, Netherlands, North Caucasus, North European Russi, Northwest European R, Poland, Romania, South European Russi, Spain, Switzerland, Tadzhikistan, Transcaucasus, …	Sp. Pl.: 732 (1753)	0	L.	0	Linné, Carl von;Linnaeus, Carl
Leea asiatica	Phytolacca asiatica	1753	1980	(L.) Ridsdale	Andaman Is., Assam, Bangladesh, Cambodia, China South-Central, East Himalaya, India, Laos, Myanmar, Nepal, Thailand, Vietnam, West Himalaya	K.S.Manilal, Bot. Hist. Hort. Malabaricus: 189 (1980)	0	L.	0	Linné, Carl von;Linnaeus, Carl
Leersia oryzoides	Phalaris oryzoides	1753	1788	(L.) Sw.	Alabama, Albania, Altay, Arizona, Arkansas, Austria, Azores, Baltic States, Belarus, Belgium, British Columbia, Bulgaria, California, Central European Rus, China Southeast, Colorado, Connecticut, Corse, Czechoslovakia, Delaware, Denmark, District of Columbia, East European Russia, Finland, Florida, France, Georgia, Germany, Great Britain, Greece, Hainan, Hungary, Idaho, Illinois, Indiana, Iowa, I…	Prodr. Veg. Ind. Occ.: 21 (1788)	0	L.	0	Linné, Carl von;Linnaeus, Carl
Leibnitzia anandria	Tussilago anandria	1753	1937	(L.) Nakai	Altay, Amur, Buryatiya, China North-Central, China South-Central, China Southeast, Chita, Inner Mongolia, Irkutsk, Japan, Khabarovsk, Korea, Krasnoyarsk, Kuril Is., Manchuria, Mongolia, Primorye, Sakhalin, Taiwan, Tuva, West Siberia	J. Jap. Bot. 13: 852 (1937)	0	L.	0	Linné, Carl von;Linnaeus, Carl
Lemna minor		1753	1753	L.	Afghanistan, Alabama, Alaska, Albania, Algeria, Altay, Amur, Arizona, Arkansas, Austria, Azores, Baleares, Baltic States, Bangladesh, Belarus, Belgium, Bermuda, British Columbia, Bulgaria, Buryatiya, California, Canary Is., Cape Provinces, Cape Verde, Central European Rus, Chad, Chita, Colorado, Connecticut, Corse, Cyprus, Czechoslovakia, Delaware, Denmark, District of Columbia, East Aegean Is., …	Sp. Pl.: 970 (1753)	0	L.	0	Linné, Carl von;Linnaeus, Carl
Lemna trisulca		1753	1753	L.	Afghanistan, Alabama, Alaska, Alberta, Algeria, Altay, Amur, Arizona, Arkansas, Austria, Baltic States, Bangladesh, Belarus, Belgium, British Columbia, Bulgaria, Buryatiya, California, Central European Rus, China North-Central, China South-Central, China Southeast, Chita, Colorado, Connecticut, Czechoslovakia, Delaware, Denmark, District of Columbia, East European Russia, Finland, Florida, France…	Sp. Pl.: 970 (1753)	0	L.	0	Linné, Carl von;Linnaeus, Carl
Leonurus sibiricus		1753	1753	L.	Bangladesh, Buryatiya, China North-Central, Chita, Inner Mongolia, Mongolia	Sp. Pl.: 584 (1753)	0	L.	0	Linné, Carl von;Linnaeus, Carl
Lepidium draba		1753	1753	L.	Albania, Algeria, Altay, Austria, Baleares, Bulgaria, Central European Rus, China North-Central, Corse, Cyprus, East Aegean Is., East European Russia, Egypt, France, Greece, Gulf States, Hungary, Iran, Italy, Kazakhstan, Kirgizstan, Kriti, Krym, Lebanon-Syria, Libya, Manchuria, Morocco, Northwest European R, Oman, Pakistan, Palestine, Romania, Sardegna, Saudi Arabia, Sicilia, Sinai, South Europea…	Sp. Pl.: 645 (1753)	0	L.	0	Linné, Carl von;Linnaeus, Carl
Lepidium latifolium		1753	1753	L.	Afghanistan, Albania, Algeria, Altay, Baltic States, Belgium, Bulgaria, Central European Rus, China North-Central, China South-Central, China Southeast, Cyprus, Denmark, East Aegean Is., East European Russia, East Himalaya, Egypt, France, Great Britain, Greece, Inner Mongolia, Iran, Iraq, Irkutsk, Italy, Kazakhstan, Kirgizstan, Korea, Krasnoyarsk, Krym, Lebanon-Syria, Libya, Manchuria, Mongolia, …	Sp. Pl.: 644 (1753)	0	L.	0	Linné, Carl von;Linnaeus, Carl
Lepidium perfoliatum		1753	1753	L.	Afghanistan, Albania, Altay, Austria, Bulgaria, Central European Rus, China North-Central, China Southeast, Cyprus, Czechoslovakia, East Aegean Is., East European Russia, Greece, Hungary, Iran, Iraq, Kazakhstan, Kirgizstan, Krym, Manchuria, North Caucasus, Pakistan, Romania, South European Russi, Tadzhikistan, Transcaucasus, Turkey, Turkey-in-Europe, Turkmenistan, Ukraine, Uzbekistan, Xinjiang, Y…	Sp. Pl.: 643 (1753)	0	L.	0	Linné, Carl von;Linnaeus, Carl
Lepidium ruderale		1753	1753	L.	Albania, Altay, Austria, Baltic States, Belarus, Belgium, Bulgaria, Buryatiya, Central European Rus, Czechoslovakia, Denmark, East European Russia, Finland, France, Germany, Great Britain, Greece, Hungary, Iran, Iraq, Irkutsk, Italy, Kazakhstan, Khabarovsk, Kirgizstan, Krasnoyarsk, Krym, Mongolia, Netherlands, North European Russi, Northwest European R, Norway, Poland, Portugal, Primorye, Romania…	Sp. Pl.: 645 (1753)	0	L.	0	Linné, Carl von;Linnaeus, Carl
Leptochloa chinensis	Poa chinensis	1753	1824	(L.) Nees	Bangladesh, Borneo, Botswana, Cambodia, China North-Central, China South-Central, China Southeast, East Himalaya, Hainan, India, Japan, Jawa, Kenya, Korea, KwaZulu-Natal, Laos, Lesser Sunda Is., Malaya, Myanmar, New Guinea, Northern Provinces, Philippines, South China Sea, Sri Lanka, Sulawesi, Sumatera, Swaziland, Taiwan, Tanzania, Thailand, Vietnam, West Himalaya, Zimbabwe	Syll. Pl. Nov. 1: 4 (1824)	0	L.	0	Linné, Carl von;Linnaeus, Carl
Leptopetalum biflorum	Oldenlandia biflora	1753	2015	(L.) Neupane & N.Wikstr.	Bangladesh, Caroline Is., China South-Central, China Southeast, East Himalaya, Fiji, Gilbert Is., Hainan, India, Jawa, Laccadive Is., Malaya, Maldives, Maluku, Marianas, Marshall Is., Myanmar, Nansei-shoto, Nepal, New Caledonia, New Guinea, Nicobar Is., Niue, Philippines, Queensland, Samoa, Solomon Is., South China Sea, Sri Lanka, Sulawesi, Taiwan, Thailand, Tonga, Vanuatu, Vietnam, Wallis-Futuna…	Taxon 64: 317 (2015)	0	L.	0	Linné, Carl von;Linnaeus, Carl
Leptopyrum fumarioides	Isopyrum fumarioides	1753	1828	(L.) Rchb.	Altay, Amur, Buryatiya, China North-Central, Chita, Inner Mongolia, Irkutsk, Kazakhstan, Khabarovsk, Korea, Krasnoyarsk, Manchuria, Mongolia, Qinghai, Tuva, West Siberia, Xinjiang, Yakutskiya	Consp. Regn. Veg.: 192 (1828)	0	L.	0	Linné, Carl von;Linnaeus, Carl
Leucas zeylanica	Phlomis zeylanica	1753	1811	(L.) W.T.Aiton	Assam, Bangladesh, Borneo, Cambodia, China Southeast, Christmas I., East Himalaya, Hainan, India, Jawa, Lesser Sunda Is., Malaya, Maluku, Myanmar, Nepal, New Guinea, Philippines, Sri Lanka, Sumatera, Thailand, Vietnam, West Himalaya	Hortus Kew. 3: 409 (1811)	0	L.	0	Linné, Carl von;Linnaeus, Carl
Ligularia sibirica	Othonna sibirica	1753	1823	(L.) Cass.	Altay, Amur, Bulgaria, Buryatiya, Central European Rus, Chita, Czechoslovakia, East European Russia, Hungary, Inner Mongolia, Irkutsk, Kazakhstan, Khabarovsk, Krasnoyarsk, Manchuria, Mongolia, North Caucasus, North European Russi, Northwest European R, Poland, Primorye, Romania, Transcaucasus, Turkey, Tuva, Ukraine, West Siberia, Yakutskiya, Yugoslavia	Dict. Sci. Nat., ed. 2. 26: 402 (1823)	0	L.	0	Linné, Carl von;Linnaeus, Carl
Lilium martagon		1753	1753	L.	Albania, Altay, Austria, Baltic States, Belarus, Bulgaria, Buryatiya, Central European Rus, Corse, Czechoslovakia, East European Russia, France, Germany, Greece, Hungary, Irkutsk, Italy, Kazakhstan, Krasnoyarsk, Mongolia, North Caucasus, Poland, Portugal, Romania, South European Russi, Spain, Switzerland, Transcaucasus, Turkey, Turkey-in-Europe, Tuva, Ukraine, West Siberia, Xinjiang, Yakutskiya, …	Sp. Pl.: 303 (1753)	0	L.	0	Linné, Carl von;Linnaeus, Carl
Limonium aureum	Statice aurea	1753	1790	(L.) Chaz.	Buryatiya, China North-Central, Chita, Inner Mongolia, Mongolia, Tuva	P.Miller, Suppl. Dict. Jard. 2: 35 (1790)	0	L.	0	Linné, Carl von;Linnaeus, Carl
Limonium flexuosum	Statice flexuosa	1753	1790	(L.) Chaz.	Buryatiya, Chita, Inner Mongolia, Irkutsk, Mongolia, Tuva	P.Miller, Suppl. Dict. Jard. 2: 34 (1790)	0	L.	0	Linné, Carl von;Linnaeus, Carl
Limonium suffruticosum	Statice suffruticosa	1753	1891	(L.) Kuntze	Altay, Iran, Kazakhstan, Krym, Mongolia, South European Russi, Tadzhikistan, Turkmenistan, Ukraine, Uzbekistan, West Siberia, Xinjiang	Revis. Gen. Pl. 2: 396 (1891)	0	L.	0	Linné, Carl von;Linnaeus, Carl
Limosella aquatica		1753	1753	L.	Afghanistan, Alaska, Alberta, Aleutian Is., Altay, Amur, Arizona, Austria, Baltic States, Belarus, Belgium, British Columbia, Buryatiya, California, Central European Rus, China South-Central, China Southeast, Chita, Colorado, Cyprus, Czechoslovakia, Denmark, East European Russia, Ecuador, Egypt, Finland, France, Germany, Great Britain, Greece, Greenland, Hungary, Iceland, Idaho, Ireland, Irkutsk,…	Sp. Pl.: 631 (1753)	0	L.	0	Linné, Carl von;Linnaeus, Carl
Linaria genistifolia	Antirrhinum genistifolium	1753	1768	(L.) Mill.	Albania, Altay, Austria, Bulgaria, Central European Rus, Czechoslovakia, Greece, Hungary, Italy, Kazakhstan, Krasnoyarsk, Krym, Lebanon-Syria, Poland, Romania, South European Russi, Transcaucasus, Turkey, Turkey-in-Europe, Ukraine, Uzbekistan, West Siberia, Xinjiang, Yugoslavia	Gard. Dict. ed. 8: n.º 14 (1768)	0	L.	0	Linné, Carl von;Linnaeus, Carl
Linnaea borealis		1753	1753	L.	Alaska, Aleutian Is., Altay, Amur, Austria, Baltic States, Belarus, Buryatiya, Central European Rus, China North-Central, Chita, Czechoslovakia, Denmark, East European Russia, Finland, France, Germany, Great Britain, Inner Mongolia, Irkutsk, Italy, Kamchatka, Kazakhstan, Khabarovsk, Korea, Krasnoyarsk, Kuril Is., Magadan, Manchuria, Mongolia, Netherlands, North European Russi, Northwest European …	Sp. Pl.: 631 (1753)	0	L.	0	Linné, Carl von;Linnaeus, Carl
Linum perenne		1753	1753	L.	Altay, Austria, Belarus, Buryatiya, Central European Rus, China North-Central, China South-Central, Czechoslovakia, East European Russia, Germany, Hungary, Inner Mongolia, Irkutsk, Kazakhstan, Krasnoyarsk, Mongolia, Poland, Qinghai, Tibet, Tuva, Ukraine, West Siberia, Xinjiang, Yakutskiya	Sp. Pl.: 277 (1753)	0	L.	0	Linné, Carl von;Linnaeus, Carl
Lithospermum officinale		1753	1753	L.	Afghanistan, Albania, Altay, Austria, Baleares, Baltic States, Belarus, Belgium, Bulgaria, Buryatiya, Central European Rus, China North-Central, Corse, Czechoslovakia, Denmark, East European Russia, East Himalaya, Finland, France, Germany, Great Britain, Greece, Hungary, Iceland, Inner Mongolia, Iran, Ireland, Irkutsk, Italy, Kazakhstan, Kirgizstan, Krasnoyarsk, Krym, Nepal, Netherlands, North Eu…	Sp. Pl.: 132 (1753)	0	L.	0	Linné, Carl von;Linnaeus, Carl
Lobelia zeylanica		1753	1753	L.	Assam, Bangladesh, Borneo, China South-Central, China Southeast, East Himalaya, Hainan, India, Jawa, Laos, Malaya, Myanmar, Nepal, New Guinea, Philippines, Sri Lanka, Sulawesi, Sumatera, Taiwan, Thailand, Vietnam	Sp. Pl.: 932 (1753)	0	L.	0	Linné, Carl von;Linnaeus, Carl
Lolium giganteum	Bromus giganteus	1753	1993	(L.) Darbysh.	Afghanistan, Albania, Altay, Austria, Baltic States, Belarus, Belgium, Bulgaria, Central European Rus, China South-Central, Corse, Czechoslovakia, Denmark, East European Russia, East Himalaya, Finland, France, Germany, Great Britain, Greece, Gulf of Guinea Is., Hungary, Iran, Ireland, Italy, Kazakhstan, Kirgizstan, Krasnoyarsk, Krym, Nepal, Netherlands, North Caucasus, North European Russi, North…	Novon 3: 241 (1993)	0	L.	0	Linné, Carl von;Linnaeus, Carl
Lolium temulentum		1753	1753	L.	Afghanistan, Albania, Algeria, Austria, Azores, Baleares, Baltic States, Belarus, Bulgaria, Canary Is., Central European Rus, China North-Central, China Southeast, Corse, Cyprus, Czechoslovakia, East Aegean Is., East European Russia, Egypt, France, Greece, Gulf States, Hungary, India, Iran, Iraq, Italy, Kazakhstan, Kirgizstan, Korea, Krasnoyarsk, Kriti, Krym, Kuwait, Lebanon-Syria, Libya, Madeira…	Sp. Pl.: 83 (1753)	0	L.	0	Linné, Carl von;Linnaeus, Carl
Lomatogonium rotatum	Swertia rotata	1753	1849	(L.) Fr.	Alaska, Alberta, Altay, Amur, British Columbia, Buryatiya, China North-Central, Chita, Colorado, Greenland, Iceland, Idaho, Inner Mongolia, Irkutsk, Kamchatka, Kazakhstan, Khabarovsk, Kirgizstan, Krasnoyarsk, Labrador, Magadan, Manchuria, Manitoba, Mongolia, New Mexico, Newfoundland, North European Russi, Northwest Territorie, Nunavut, Ontario, Qinghai, Québec, Sakhalin, Tuva, Utah, West Siberia,…	Summa Veg. Scand. 2: 554 (1849)	0	L.	0	Linné, Carl von;Linnaeus, Carl
Lonicera caerulea		1753	1753	L.	Albania, Amur, Austria, Baltic States, Belarus, Bulgaria, Buryatiya, China North-Central, China South-Central, Chita, Czechoslovakia, Finland, France, Germany, Inner Mongolia, Italy, Japan, Kamchatka, Khabarovsk, Korea, Kuril Is., Magadan, Manchuria, Mongolia, North European Russi, Northwest European R, Primorye, Qinghai, Romania, Sakhalin, Spain, Sweden, Switzerland, Ukraine, Xinjiang, Yakutskiy…	Sp. Pl.: 174 (1753)	0	L.	0	Linné, Carl von;Linnaeus, Carl
Lonicera tatarica		1753	1753	L.	Altay, Central European Rus, East European Russia, Kazakhstan, Kirgizstan, Krasnoyarsk, Manchuria, West Siberia, Xinjiang	Sp. Pl.: 173 (1753)	0	L.	0	Linné, Carl von;Linnaeus, Carl
Lotus angustissimus		1753	1753	L.	Albania, Algeria, Azores, Baleares, Bulgaria, Canary Is., Central European Rus, Corse, Cyprus, East Aegean Is., East European Russia, Egypt, France, Great Britain, Greece, Hungary, Iran, Italy, Kazakhstan, Kriti, Krym, Lebanon-Syria, Madeira, Morocco, North Caucasus, Palestine, Portugal, Romania, Sardegna, Sicilia, South European Russi, Spain, Transcaucasus, Tunisia, Turkey, Turkey-in-Europe, Ukr…	Sp. Pl.: 774 (1753)	0	L.	0	Linné, Carl von;Linnaeus, Carl
Lotus corniculatus		1753	1753	L.	Afghanistan, Albania, Algeria, Austria, Azores, Baleares, Baltic States, Belarus, Belgium, Bulgaria, Central European Rus, Corse, Cyprus, Czechoslovakia, Denmark, East Aegean Is., East European Russia, East Himalaya, Egypt, Eritrea, Ethiopia, Finland, France, Føroyar, Germany, Great Britain, Greece, Gulf States, Hungary, Iran, Iraq, Ireland, Italy, Japan, Kazakhstan, Kenya, Krasnoyarsk, Kriti, Kr…	Sp. Pl.: 775 (1753)	0	L.	0	Linné, Carl von;Linnaeus, Carl
Ludwigia perennis		1753	1753	L.	Afghanistan, Assam, Bangladesh, Benin, Borneo, Burkina, Cambodia, Cameroon, Central African Repu, Chad, China South-Central, China Southeast, Congo, East Himalaya, Ethiopia, Hainan, India, Ivory Coast, Kenya, KwaZulu-Natal, Laos, Lesser Sunda Is., Madagascar, Malawi, Malaya, Mali, Mauritania, Mozambique, Myanmar, Nepal, New Caledonia, New Guinea, Philippines, Senegal, Somalia, Sri Lanka, Sudan, S…	Sp. Pl.: 119 (1753)	0	L.	0	Linné, Carl von;Linnaeus, Carl
Lupinus angustifolius		1753	1753	L.	Albania, Bulgaria, China North-Central, China Southeast, Corse, East Aegean Is., Egypt, France, Greece, Italy, Kriti, Lebanon-Syria, Libya, Morocco, Palestine, Portugal, Sardegna, Sicilia, Spain, Tunisia, Turkey-in-Europe	Sp. Pl.: 721 (1753)	0	L.	0	Linné, Carl von;Linnaeus, Carl
Luzula spicata	Juncus spicatus	1753	1805	(L.) DC.	Afghanistan, Alaska, Albania, Alberta, Aleutian Is., Altay, Arizona, Austria, British Columbia, Bulgaria, Buryatiya, California, China South-Central, Colorado, Corse, Czechoslovakia, East European Russia, Finland, France, Føroyar, Germany, Great Britain, Greece, Greenland, Iceland, Idaho, Iran, Irkutsk, Italy, Kazakhstan, Kirgizstan, Krasnoyarsk, Labrador, Maine, Manitoba, Mongolia, Montana, Moro…	J.B.A.M.de Lamarck &amp; A.P.de Candolle, Fl. Franç., ed. 3, 3: 161 (1805)	0	L.	0	Linné, Carl von;Linnaeus, Carl
Lycium barbarum		1753	1753	L.	China North-Central, China South-Central, Inner Mongolia, Qinghai, Xinjiang	Sp. Pl.: 192 (1753)	1	L.	0	Linné, Carl von;Linnaeus, Carl
Lycopodiella caroliniana	Lycopodium carolinianum	1753	1968	(L.) Pic.Serm.	Alabama, Arkansas, China Southeast, Delaware, Florida, Georgia, Haiti, Japan, Louisiana, Malaya, Maryland, Masachusettes, Mississippi, New Jersey, New York, North Carolina, Pennsylvania, South Carolina, Sri Lanka, Texas, Virginia	Webbia 23(1): 165 (1968)	0	L.	0	Linné, Carl von;Linnaeus, Carl
Lycopodiella cernua	Lycopodium cernuum	1753	1968	(L.) Pic.Serm.	Alabama, Andaman Is., Angola, Argentina Northeast, Arkansas, Ascension, Assam, Azores, Bangladesh, Belize, Benin, Bismarck Archipelago, Bolivia, Borneo, Brazil North, Brazil Northeast, Brazil South, Brazil Southeast, Brazil West-Central, Burundi, Cameroon, Cape Provinces, Cape Verde, Caroline Is., Central African Repu, China South-Central, China Southeast, Colombia, Comoros, Cook Is., Costa Rica,…	Webbia 23: 166 (1968)	0	L.	0	Linné, Carl von;Linnaeus, Carl
Lycopodiella inundata	Lycopodium inundatum	1753	1964	(L.) Holub	Alaska, Alberta, Austria, Azores, Belarus, Belgium, British Columbia, Bulgaria, Buryatiya, California, China Southeast, Connecticut, Czechoslovakia, Denmark, Finland, France, Germany, Great Britain, Hungary, Idaho, Illinois, Indiana, Iowa, Ireland, Italy, Japan, Kentucky, Labrador, Maine, Manitoba, Maryland, Masachusettes, Michigan, Minnesota, Montana, Netherlands, New Brunswick, New Hampshire, N…	Preslia 36: 21 (1964)	0	L.	0	Linné, Carl von;Linnaeus, Carl
Lycopodium annotinum		1753	1753	L.	Alaska, Alberta, Altay, Amur, Arizona, Austria, Baltic States, Belarus, Belgium, British Columbia, Bulgaria, Buryatiya, Central European Rus, China North-Central, China South-Central, Chita, Colorado, Connecticut, Czechoslovakia, Denmark, East European Russia, Finland, France, Germany, Great Britain, Greenland, Hungary, Idaho, Irkutsk, Italy, Japan, Kamchatka, Kazakhstan, Kentucky, Khabarovsk, Ko…	Sp. Pl.: 1103 (1753)	0	L.	0	Linné, Carl von;Linnaeus, Carl
Lycopodium clavatum		1753	1753	L.	Alaska, Altay, Amur, Austria, Baltic States, Belarus, Belgium, Borneo, Brazil North, Brazil Northeast, Brazil South, Brazil Southeast, Brazil West-Central, British Columbia, Bulgaria, Burundi, Buryatiya, California, Cameroon, Cape Provinces, Central European Rus, Colombia, Comoros, Connecticut, Czechoslovakia, Delaware, Denmark, District of Columbia, Dominican Republic, East European Russia, Ethi…	Sp. Pl.: 1101 (1753)	0	L.	0	Linné, Carl von;Linnaeus, Carl
Lycopodium complanatum		1753	1753	L.	Alaska, Alberta, Altay, Amur, Assam, Austria, Baltic States, Belarus, Belgium, British Columbia, Bulgaria, Buryatiya, Central European Rus, China South-Central, China Southeast, Czechoslovakia, Denmark, Dominican Republic, East European Russia, East Himalaya, Finland, France, Germany, Greenland, Hainan, Haiti, Hungary, Idaho, India, Irkutsk, Italy, Japan, Kamchatka, Kazakhstan, Khabarovsk, Korea,…	Sp. Pl.: 1104 (1753)	0	L.	0	Linné, Carl von;Linnaeus, Carl
Lycopus europaeus		1753	1753	L.	Afghanistan, Albania, Algeria, Altay, Austria, Azores, Baltic States, Belarus, Belgium, Bulgaria, Buryatiya, Central European Rus, China North-Central, Corse, Czechoslovakia, Denmark, East Aegean Is., East European Russia, Finland, France, Germany, Great Britain, Greece, Hungary, Iran, Iraq, Ireland, Irkutsk, Italy, Kazakhstan, Kirgizstan, Krasnoyarsk, Kriti, Krym, Lebanon-Syria, Morocco, Netherl…	Sp. Pl.: 21 (1753)	0	L.	0	Linné, Carl von;Linnaeus, Carl
Lygodium flexuosum	Ophioglossum flexuosum	1753	1801	(L.) Sw.	Andaman Is., Assam, Bangladesh, Cambodia, China South-Central, China Southeast, East Himalaya, Hainan, India, Laos, Lesser Sunda Is., Malaya, Maluku, Myanmar, Nansei-shoto, Nepal, New Guinea, Northern Territory, Philippines, Queensland, Sri Lanka, Sulawesi, Thailand, Vietnam, West Himalaya, Western Australia	J. Bot. (Schrader) 1800(2): 106 (1801)	0	L.	0	Linné, Carl von;Linnaeus, Carl
Lysimachia europaea	Trientalis europaea	1753	2009	(L.) U.Manns & Anderb.	Alaska, Alberta, Aleutian Is., Altay, Amur, Austria, Baltic States, Belarus, Belgium, British Columbia, Buryatiya, California, Central European Rus, China North-Central, Chita, Czechoslovakia, Denmark, East European Russia, Finland, France, Germany, Great Britain, Iceland, Idaho, Inner Mongolia, Irkutsk, Italy, Kamchatka, Kazakhstan, Khabarovsk, Korea, Krasnoyarsk, Kuril Is., Magadan, Manchuria, …	Willdenowia 39: 51 (2009)	0	L.	0	Linné, Carl von;Linnaeus, Carl
Lysimachia maritima	Glaux maritima	1753	2005	(L.) Galasso, Banfi & Soldano	Afghanistan, Alaska, Alberta, Altay, Austria, Baltic States, Belarus, Belgium, British Columbia, Buryatiya, California, Central European Rus, China North-Central, China South-Central, China Southeast, Chita, Colorado, Czechoslovakia, Denmark, East European Russia, Finland, France, Germany, Great Britain, Hungary, Iceland, Idaho, Inner Mongolia, Iran, Ireland, Irkutsk, Japan, Kazakhstan, Khabarovs…	Atti Soc. Ital. Sci. Nat. Mus. Civico Storia Nat. Milano 146: 229 (2005)	0	L.	0	Linné, Carl von;Linnaeus, Carl
Lysimachia thyrsiflora		1753	1753	L.	Alaska, Albania, Alberta, Aleutian Is., Altay, Amur, Baltic States, Belarus, Belgium, British Columbia, Buryatiya, California, Central European Rus, China North-Central, China South-Central, Chita, Colorado, Connecticut, Czechoslovakia, Denmark, East European Russia, Finland, France, Germany, Great Britain, Hungary, Idaho, Illinois, Indiana, Inner Mongolia, Iowa, Irkutsk, Kamchatka, Kansas, Kazak…	Sp. Pl.: 147 (1753)	0	L.	0	Linné, Carl von;Linnaeus, Carl
Lysimachia vulgaris		1753	1753	L.	Albania, Algeria, Altay, Austria, Baltic States, Belarus, Belgium, Bulgaria, Buryatiya, Central European Rus, Corse, Czechoslovakia, Denmark, East European Russia, Finland, France, Germany, Great Britain, Greece, Hungary, Iran, Iraq, Ireland, Irkutsk, Italy, Kazakhstan, Kirgizstan, Krasnoyarsk, Krym, Netherlands, North European Russi, Northwest European R, Norway, Poland, Portugal, Romania, Sicil…	Sp. Pl.: 146 (1753)	0	L.	0	Linné, Carl von;Linnaeus, Carl
Lythrum salicaria		1753	1753	L.	Afghanistan, Albania, Algeria, Altay, Amur, Austria, Baltic States, Belarus, Belgium, Bulgaria, Central European Rus, China North-Central, China South-Central, Corse, Czechoslovakia, Denmark, East European Russia, Ethiopia, Finland, France, Germany, Great Britain, Greece, Hungary, Inner Mongolia, Iran, Iraq, Ireland, Irkutsk, Italy, Kazakhstan, Khabarovsk, Kirgizstan, Korea, Krym, Kuril Is., Leba…	Sp. Pl.: 446 (1753)	0	L.	0	Linné, Carl von;Linnaeus, Carl
Lythrum virgatum		1753	1753	L.	Albania, Altay, Austria, Belarus, Bulgaria, Central European Rus, China North-Central, Czechoslovakia, East European Russia, Greece, Hungary, Italy, Kazakhstan, Kirgizstan, Krasnoyarsk, Krym, Mongolia, Poland, Romania, South European Russi, Turkey, Turkey-in-Europe, Tuva, Ukraine, West Siberia, Xinjiang, Yugoslavia	Sp. Pl.: 447 (1753)	0	L.	0	Linné, Carl von;Linnaeus, Carl
Macrosolen parasiticus	Lonicera parasitica	1753	1936	(L.) Danser	East Himalaya, India, Sri Lanka, Tibet	Blumea 2: 36 (1936)	0	L.	0	Linné, Carl von;Linnaeus, Carl
Magnolia champaca	Michelia champaca	1753	1880	(L.) Baill. ex Pierre	Bangladesh, Borneo, Cambodia, China South-Central, India, Jawa, Laos, Lesser Sunda Is., Malaya, Myanmar, Sumatera, Thailand, Tibet, Vietnam	Fl. Forest. Cochinch.: t. 3 (1880)	0	L.	0	Linné, Carl von;Linnaeus, Carl
Maianthemum bifolium	Convallaria bifolia	1753	1794	(L.) F.W.Schmidt	Altay, Amur, Austria, Baltic States, Belarus, Belgium, Buryatiya, Central European Rus, China North-Central, China South-Central, Chita, Czechoslovakia, Denmark, East European Russia, Finland, France, Germany, Great Britain, Hungary, Inner Mongolia, Irkutsk, Italy, Japan, Kamchatka, Kazakhstan, Khabarovsk, Korea, Krasnoyarsk, Krym, Kuril Is., Manchuria, Mongolia, Netherlands, North Caucasus, Nort…	Fl. Boëm. 4: 55 (1794)	0	L.	0	Linné, Carl von;Linnaeus, Carl
Maianthemum trifolium	Convallaria trifolia	1753	1852	(L.) Sloboda	Alberta, Amur, British Columbia, Buryatiya, Chita, Connecticut, Irkutsk, Kamchatka, Khabarovsk, Korea, Krasnoyarsk, Labrador, Magadan, Maine, Manchuria, Manitoba, Masachusettes, Michigan, Minnesota, New Brunswick, New Hampshire, New Jersey, New York, Newfoundland, Northwest Territorie, Nova Scotia, Nunavut, Ohio, Ontario, Pennsylvania, Primorye, Prince Edward I., Québec, Rhode I., Sakhalin, Saska…	Rostlinnictví: 192 (1852)	0	L.	0	Linné, Carl von;Linnaeus, Carl
Malaxis monophyllos	Ophrys monophyllos	1753	1800	(L.) Sw.	Alaska, Alberta, Aleutian Is., Altay, Amur, Austria, Baltic States, Belarus, British Columbia, Buryatiya, Central European Rus, China North-Central, China South-Central, China Southeast, Chita, Colorado, Connecticut, Czechoslovakia, East European Russia, Finland, France, Illinois, Indiana, Inner Mongolia, Irkutsk, Italy, Japan, Kamchatka, Khabarovsk, Korea, Krasnoyarsk, Kuril Is., Labrador, Maine…	Kongl. Vetensk. Acad. Nya Handl. 21: 234 (1800)	0	L.	0	Linné, Carl von;Linnaeus, Carl
Mallotus nudiflorus	Trevia nudiflora	1753	2007	(L.) Kulju & Welzen	Assam, Bangladesh, Borneo, China South-Central, China Southeast, East Himalaya, Hainan, India, Jawa, Laos, Malaya, Myanmar, Nepal, Philippines, Sri Lanka, Sumatera, Thailand, Vietnam, West Himalaya	Blumea 52: 124 (2007)	0	L.	0	Linné, Carl von;Linnaeus, Carl
Malva sylvestris		1753	1753	L.	Afghanistan, Albania, Algeria, Altay, Austria, Azores, Baleares, Baltic States, Belarus, Belgium, Bulgaria, Central European Rus, Corse, Cyprus, Czechoslovakia, Denmark, East Aegean Is., East European Russia, Egypt, Finland, France, Germany, Great Britain, Greece, Hungary, Iran, Iraq, Ireland, Italy, Kazakhstan, Kirgizstan, Kriti, Krym, Lebanon-Syria, Libya, Madeira, Morocco, Netherlands, North E…	Sp. Pl.: 689 (1753)	0	L.	0	Linné, Carl von;Linnaeus, Carl
Malva verticillata		1753	1753	L.	Afghanistan, Altay, Amur, Buryatiya, China North-Central, China South-Central, China Southeast, Chita, East Himalaya, Eritrea, Ethiopia, Inner Mongolia, Irkutsk, Kazakhstan, Kirgizstan, Korea, Krasnoyarsk, Lebanon-Syria, Manchuria, Mongolia, Myanmar, Pakistan, Primorye, Qinghai, Saudi Arabia, Somalia, Sudan, Tibet, West Himalaya, West Siberia, Xinjiang, Yakutskiya, Yemen	Sp. Pl.: 689 (1753)	0	L.	0	Linné, Carl von;Linnaeus, Carl
Mangifera indica		1753	1753	L.	Assam, Belize, China South-Central, East Himalaya, Myanmar, Thailand	Sp. Pl.: 200 (1753)	0	L.	0	Linné, Carl von;Linnaeus, Carl
Marrubium vulgare		1753	1753	L.	Afghanistan, Albania, Algeria, Austria, Azores, Baleares, Baltic States, Belarus, Belgium, Bulgaria, Canary Is., Cape Verde, Central European Rus, Corse, Cyprus, Czechoslovakia, Denmark, East Aegean Is., France, Germany, Great Britain, Greece, Hungary, Iran, Iraq, Italy, Kazakhstan, Kriti, Krym, Lebanon-Syria, Libya, Madeira, Morocco, Nepal, Netherlands, North Caucasus, Pakistan, Palestine, Polan…	Sp. Pl.: 583 (1753)	0	L.	0	Linné, Carl von;Linnaeus, Carl
Marsilea quadrifolia		1753	1753	L.	Albania, Austria, Bulgaria, Canary Is., China North-Central, China Southeast, Czechoslovakia, East European Russia, France, Germany, Hungary, Inner Mongolia, Iran, Italy, Japan, Kazakhstan, Korea, Manchuria, Northwest European R, Poland, Portugal, Qinghai, Romania, Spain, Switzerland, Transcaucasus, Turkey, Ukraine, Yugoslavia	Sp. Pl.: 1099 (1753)	0	L.	0	Linné, Carl von;Linnaeus, Carl
Matricaria chamomilla		1753	1753	L.	Afghanistan, Albania, Algeria, Altay, Austria, Azores, Belarus, Belgium, Bulgaria, Buryatiya, Canary Is., Central European Rus, China North-Central, China South-Central, China Southeast, Cyprus, Czechoslovakia, Denmark, East Aegean Is., East European Russia, Egypt, Finland, France, Germany, Great Britain, Greece, Hungary, India, Iran, Iraq, Irkutsk, Italy, Kazakhstan, Kirgizstan, Korea, Krasnoyar…	Sp. Pl.: 891 (1753)	0	L.	0	Linné, Carl von;Linnaeus, Carl
Medicago falcata		1753	1753	L.	Afghanistan, Albania, Assam, Austria, Baltic States, Belarus, Belgium, Bulgaria, Central European Rus, China North-Central, Corse, Czechoslovakia, Denmark, East European Russia, East Himalaya, France, Germany, Great Britain, Greece, Hungary, India, Inner Mongolia, Iran, Ireland, Italy, Kazakhstan, Kirgizstan, Kriti, Krym, Lebanon-Syria, Manchuria, Mongolia, Nepal, Netherlands, North Caucasus, Nor…	Sp. Pl.: 779 (1753)	0	L.	0	Linné, Carl von;Linnaeus, Carl
Medicago lupulina		1753	1753	L.	Afghanistan, Albania, Algeria, Austria, Azores, Baleares, Baltic States, Bangladesh, Belarus, Belgium, Bulgaria, Canary Is., Central European Rus, China North-Central, China South-Central, China Southeast, Corse, Cyprus, Czechoslovakia, Denmark, East Aegean Is., East European Russia, Egypt, Eritrea, Ethiopia, Finland, France, Germany, Great Britain, Greece, Hungary, India, Iran, Iraq, Ireland, It…	Sp. Pl.: 779 (1753)	0	L.	0	Linné, Carl von;Linnaeus, Carl
Medicago minima	Medicago polymorpha var. minima	1753	1776	(L.) Bartal.	Afghanistan, Albania, Algeria, Austria, Baleares, Belgium, Bulgaria, Canary Is., Central European Rus, China North-Central, China South-Central, China Southeast, Corse, Cyprus, Czechoslovakia, Denmark, Djibouti, East Aegean Is., East European Russia, Egypt, Eritrea, Ethiopia, France, Germany, Great Britain, Greece, Hungary, India, Iran, Iraq, Italy, Kazakhstan, Kirgizstan, Kriti, Krym, Lebanon-Sy…	Cat. Piante Siena: 60 (1776)	0	L.	0	Linné, Carl von;Linnaeus, Carl
Medicago platycarpos	Trigonella platycarpos	1753	1841	(L.) Trautv.	Altay, Buryatiya, Chita, East European Russia, Irkutsk, Kazakhstan, Kirgizstan, Krasnoyarsk, Mongolia, Tuva, West Siberia, Xinjiang, Yakutskiya	Bull. Cl. Phys.-Math. Acad. Imp. Sci. Saint-Pétersbourg, sér. 2, 8: 271 (1841)	0	L.	0	Linné, Carl von;Linnaeus, Carl
Medicago ruthenica	rigonella ruthenica	1753	1841	(L.) Trautv.	Amur, Buryatiya, China North-Central, China South-Central, China Southeast, Chita, Inner Mongolia, Irkutsk, Khabarovsk, Korea, Manchuria, Mongolia, Primorye, Qinghai	Bull. Sci. Acad. Imp. Sci. Saint-Pétersbourg 8: 271 (1841)	0	L.	0	Linné, Carl von;Linnaeus, Carl
Melastoma malabathricum		1753	1753	L.	Andaman Is., Bangladesh, Cambodia, China South-Central, China Southeast, East Himalaya, Hainan, Jawa, Laos, Malaya, Myanmar, Nepal, New South Wales, Nicobar Is., Northern Territory, Philippines, Queensland, Seychelles, Sri Lanka, Taiwan, Thailand, Vietnam, Western Australia	Sp. Pl.: 390 (1753)	0	L.	0	Linné, Carl von;Linnaeus, Carl
Melia azedarach		1753	1753	L.	Assam, Bangladesh, Cambodia, China North-Central, China South-Central, China Southeast, East Himalaya, Hainan, India, Laos, Lesser Sunda Is., Nepal, New Guinea, New South Wales, Northern Territory, Philippines, Queensland, Sri Lanka, Taiwan, Thailand, Vietnam, Western Australia	Sp. Pl.: 384 (1753)	0	L.	0	Linné, Carl von;Linnaeus, Carl
Melica altissima		1753	1753	L.	Altay, Austria, Bulgaria, Buryatiya, Central European Rus, Czechoslovakia, East European Russia, Hungary, Iran, Kazakhstan, Kirgizstan, Krasnoyarsk, North Caucasus, Romania, South European Russi, Tadzhikistan, Transcaucasus, Turkey, Ukraine, Uzbekistan, West Siberia, Xinjiang, Yakutskiya, Yugoslavia	Sp. Pl.: 66 (1753)	0	L.	0	Linné, Carl von;Linnaeus, Carl
Melica ciliata		1753	1753	L.	Albania, Algeria, Austria, Baleares, Baltic States, Belgium, Bulgaria, Corse, Czechoslovakia, East Aegean Is., Finland, France, Germany, Greece, Hungary, Iran, Italy, Kazakhstan, Kriti, Krym, Lebanon-Syria, Madeira, Morocco, North Caucasus, Portugal, Romania, Sardegna, Sicilia, South European Russi, Spain, Sweden, Switzerland, Transcaucasus, Tunisia, Turkey, Turkey-in-Europe, Turkmenistan, Ukrain…	Sp. Pl.: 66 (1753)	0	L.	0	Linné, Carl von;Linnaeus, Carl
Melica nutans		1753	1753	L.	Altay, Amur, Austria, Baltic States, Belarus, Belgium, Bulgaria, Buryatiya, Central European Rus, Czechoslovakia, Denmark, East European Russia, Finland, France, Germany, Great Britain, Greece, Hungary, Irkutsk, Italy, Japan, Kamchatka, Kazakhstan, Khabarovsk, Kirgizstan, Korea, Krasnoyarsk, Krym, Kuril Is., Manchuria, Mongolia, North Caucasus, North European Russi, Northwest European R, Norway, …	Sp. Pl.: 66 (1753)	0	L.	0	Linné, Carl von;Linnaeus, Carl
Melilotus indicus	Trifolium indicum	1753	1785	(L.) All.	Afghanistan, Albania, Algeria, Assam, Baleares, Bangladesh, China South-Central, China Southeast, Corse, Cyprus, East Aegean Is., East Himalaya, Egypt, France, Greece, Gulf States, Hainan, India, Iran, Iraq, Italy, Kazakhstan, Kriti, Kuwait, Lebanon-Syria, Libya, Morocco, Nepal, North Caucasus, Oman, Pakistan, Palestine, Portugal, Sardegna, Saudi Arabia, Sicilia, Sinai, Spain, Tadzhikistan, Taiwa…	Fl. Pedem. 1: 308 (1785)	0	L.	0	Linné, Carl von;Linnaeus, Carl
Melochia corchorifolia		1753	1753	L.	Angola, Assam, Bangladesh, Benin, Botswana, Burkina, Burundi, Cameroon, Caroline Is., Central African Repu, Chad, China South-Central, China Southeast, Congo, Ethiopia, Gabon, Gambia, Ghana, Guinea, Guinea-Bissau, Gulf of Guinea Is., Hainan, India, Ivory Coast, Japan, Kenya, Laos, Lesser Sunda Is., Liberia, Madagascar, Malawi, Malaya, Mali, Mauritania, Mozambique, Myanmar, Nansei-shoto, New Guine…	Sp. Pl.: 675 (1753)	0	L.	0	Linné, Carl von;Linnaeus, Carl
Mentha canadensis		1753	1753	L.	Alaska, Alberta, Amur, Arizona, Arkansas, British Columbia, Buryatiya, California, Cambodia, China North-Central, China South-Central, China Southeast, Chita, Colorado, Connecticut, Delaware, Florida, Georgia, Idaho, Illinois, Indiana, Inner Mongolia, Iowa, Irkutsk, Japan, Jawa, Kansas, Kentucky, Khabarovsk, Korea, Krasnoyarsk, Kuril Is., Laos, Lesser Sunda Is., Maine, Malaya, Maluku, Manchuria, …	Sp. Pl.: 577 (1753)	0	L.	0	Linné, Carl von;Linnaeus, Carl
Mentha longifolia	Mentha spicata var. longifolia	1753	1759	(L.) L.	Afghanistan, Albania, Algeria, Altay, Austria, Baltic States, Belarus, Belgium, Bulgaria, Canary Is., Cape Provinces, Central European Rus, Chad, China South-Central, Cyprus, Czechoslovakia, East Aegean Is., East European Russia, Egypt, Ethiopia, France, Free State, Germany, Greece, Hungary, Iran, Iraq, Italy, Kazakhstan, Kenya, Kirgizstan, Krasnoyarsk, Kriti, Krym, KwaZulu-Natal, Lebanon-Syria, …	Amoen. Acad., Linnaeus ed. 4: 485 (1759)	0	L.	0	Linné, Carl von;Linnaeus, Carl
Mentha spicata		1753	1753	L.	Afghanistan, Albania, Austria, Belgium, Bulgaria, China South-Central, China Southeast, Cyprus, Czechoslovakia, Denmark, East Aegean Is., France, Germany, Great Britain, Greece, Hungary, Iran, Ireland, Italy, Kriti, Lebanon-Syria, Nepal, Netherlands, North Caucasus, Norway, Pakistan, Palestine, Poland, Romania, Sardegna, Sicilia, Sinai, Sweden, Switzerland, Tibet, Transcaucasus, Turkey, Turkey-in…	Sp. Pl.: 576 (1753)	0	L.	0	Linné, Carl von;Linnaeus, Carl
Menyanthes trifoliata		1753	1753	L.	Afghanistan, Alaska, Aleutian Is., Altay, Amur, Austria, Baltic States, Belarus, Belgium, Bulgaria, Buryatiya, Central European Rus, China North-Central, China South-Central, China Southeast, Chita, Colorado, Corse, Czechoslovakia, Denmark, East European Russia, Finland, France, Føroyar, Germany, Great Britain, Greece, Greenland, Hungary, Iceland, Ireland, Irkutsk, Italy, Kamchatka, Kazakhstan, K…	Sp. Pl.: 145 (1753)	0	L.	0	Linné, Carl von;Linnaeus, Carl
Merremia hirta	Convolvulus hirtus	1753	1912	(L.) Merr.	Assam, Bangladesh, Borneo, Cambodia, China South-Central, China Southeast, East Himalaya, India, Jawa, Laos, Lesser Sunda Is., Malaya, Maluku, Myanmar, New Guinea, Philippines, Queensland, Solomon Is., Sulawesi, Sumatera, Taiwan, Thailand, Vietnam	Philipp. J. Sci., C 7: 244 (1912)	0	L.	0	Linné, Carl von;Linnaeus, Carl
Mertensia sibirica	Pulmonaria sibirica	1753	1837	(L.) G.Don	Buryatiya, China North-Central, Chita, Irkutsk, Krasnoyarsk, Yakutskiya	Gen. Hist. 4: 319 (1837)	0	L.	0	Linné, Carl von;Linnaeus, Carl
Microcos paniculata		1753	1753	L.	Andaman Is., Assam, Bangladesh, Cambodia, China South-Central, China Southeast, East Himalaya, Hainan, India, Laos, Lesser Sunda Is., Malaya, Myanmar, Nicobar Is., Sri Lanka, Thailand, Vietnam	Sp. Pl.: 514 (1753)	0	L.	0	Linné, Carl von;Linnaeus, Carl
Microlepia speluncae	Polypodium speluncae	1753	1858	(L.) T.Moore	Andaman Is., Angola, Argentina Northeast, Assam, Bangladesh, Benin, Bismarck Archipelago, Bolivia, Borneo, Botswana, Brazil Northeast, Brazil South, Brazil Southeast, Burundi, Cambodia, Cameroon, Caroline Is., Central African Repu, China South-Central, China Southeast, Christmas I., Comoros, Cook Is., Cuba, East Himalaya, Ecuador, Equatorial Guinea, Ethiopia, Fiji, French Guiana, Gabon, Ghana, Gu…	Index Fil.: 93 (1858)	0	L.	0	Linné, Carl von;Linnaeus, Carl
Microstachys chamaelea	Tragia chamaelea	1753	1863	(L.) Müll.Arg.	Andaman Is., Bangladesh, Benin, Borneo, Burkina, Cambodia, Cameroon, Central African Repu, Chad, China Southeast, Ghana, Hainan, India, Ivory Coast, Jawa, Malaya, Myanmar, Nigeria, Northern Territory, Queensland, Solomon Is., South China Sea, Sri Lanka, Sumatera, Thailand, Togo, Vietnam, Western Australia	Linnaea 32: 95 (1863)	0	L.	0	Linné, Carl von;Linnaeus, Carl
Microstegium fasciculatum	Andropogon fasciculatus	1753	1940	(L.) Henrard	Assam, China South-Central, China Southeast, East Himalaya, Hainan, India, Jawa, Laos, Lesser Sunda Is., Malawi, Malaya, Maluku, Myanmar, Nepal, New Guinea, Philippines, Rwanda, Sri Lanka, Sulawesi, Sumatera, Tanzania, Thailand, Uganda, Vietnam, West Himalaya, Zaïre	Blumea 3: 453 (1940)	0	L.	0	Linné, Carl von;Linnaeus, Carl
Milium effusum		1753	1753	L.	Afghanistan, Albania, Altay, Amur, Austria, Baltic States, Belarus, Belgium, Bulgaria, Buryatiya, Central European Rus, China North-Central, China South-Central, China Southeast, Connecticut, Corse, Czechoslovakia, Denmark, East European Russia, East Himalaya, Finland, France, Germany, Great Britain, Greece, Hungary, Iceland, Illinois, Indiana, Inner Mongolia, Iowa, Ireland, Irkutsk, Italy, Japan…	Sp. Pl.: 61 (1753)	0	L.	0	Linné, Carl von;Linnaeus, Carl
Mitella nuda		1753	1753	L.	Alaska, Alberta, Amur, British Columbia, Buryatiya, Chita, Connecticut, Idaho, Inner Mongolia, Iowa, Irkutsk, Japan, Khabarovsk, Korea, Krasnoyarsk, Labrador, Maine, Manchuria, Manitoba, Masachusettes, Michigan, Minnesota, Mongolia, Montana, New Brunswick, New Hampshire, New York, Newfoundland, North Dakota, Northwest Territorie, Nova Scotia, Nunavut, Ontario, Pennsylvania, Primorye, Prince Edwar…	Sp. Pl.: 406 (1753)	0	L.	0	Linné, Carl von;Linnaeus, Carl
Moehringia lateriflora	Arenaria lateriflora	1753	1833	(L.) Fenzl	Alaska, Alberta, Aleutian Is., Altay, Amur, Baltic States, Belarus, British Columbia, Buryatiya, Central European Rus, China North-Central, Chita, Colorado, Connecticut, East European Russia, Finland, Idaho, Illinois, Indiana, Inner Mongolia, Iowa, Irkutsk, Japan, Kamchatka, Kazakhstan, Khabarovsk, Korea, Krasnoyarsk, Kuril Is., Labrador, Magadan, Maine, Manchuria, Manitoba, Maryland, Masachusett…	Vers. Darstell. Alsin.: 18 (1833)	0	L.	0	Linné, Carl von;Linnaeus, Carl
Moehringia trinervia	Arenaria trinervia	1753	1811	(L.) Clairv.	Albania, Algeria, Altay, Austria, Baltic States, Belarus, Belgium, Bulgaria, Central European Rus, China North-Central, China South-Central, China Southeast, Corse, Czechoslovakia, Denmark, East European Russia, Finland, France, Germany, Great Britain, Greece, Hungary, Iran, Ireland, Italy, Japan, Kazakhstan, Kirgizstan, Krasnoyarsk, Krym, Morocco, Netherlands, North European Russi, Northwest Eur…	Man. Herbor. Suisse: 150 (1811)	0	L.	0	Linné, Carl von;Linnaeus, Carl
Moneses uniflora	Pyrola uniflora	1753	1848	(L.) A.Gray	Alaska, Albania, Alberta, Altay, Amur, Arizona, Austria, Baltic States, Belarus, Belgium, British Columbia, Bulgaria, Buryatiya, California, Central European Rus, China North-Central, China South-Central, Chita, Colorado, Connecticut, Corse, Czechoslovakia, Denmark, East European Russia, Finland, France, Germany, Great Britain, Greece, Hungary, Idaho, Irkutsk, Italy, Japan, Kamchatka, Kazakhstan,…	Manual: 273 (1848)	0	L.	0	Linné, Carl von;Linnaeus, Carl
Monotropa hypopitys		1753	1753	L.	Afghanistan, Alabama, Alaska, Albania, Alberta, Algeria, Altay, Amur, Arizona, Arkansas, Austria, Baleares, Baltic States, Belarus, Belgium, British Columbia, Bulgaria, Buryatiya, California, Central European Rus, China North-Central, China South-Central, China Southeast, Chita, Colorado, Connecticut, Corse, Cyprus, Czechoslovakia, Delaware, Denmark, District of Columbia, East Aegean Is., East Eu…	Sp. Pl.: 387 (1753)	0	L.	0	Linné, Carl von;Linnaeus, Carl
Monotropa uniflora		1753	1753	L.	Alabama, Alberta, Arkansas, British Columbia, California, China North-Central, China South-Central, China Southeast, Connecticut, Delaware, District of Columbia, East Himalaya, Florida, Georgia, Idaho, Illinois, Indiana, Iowa, Japan, Kansas, Kentucky, Korea, Kuril Is., Labrador, Louisiana, Maine, Manitoba, Maryland, Masachusettes, Michigan, Minnesota, Mississippi, Missouri, Montana, Myanmar, Nebr…	Sp. Pl.: 387 (1753)	0	L.	0	Linné, Carl von;Linnaeus, Carl
Morinda citrifolia		1753	1753	L.	Andaman Is., Assam, Bangladesh, Bismarck Archipelago, Borneo, Cambodia, China Southeast, Christmas I., Cocos (Keeling) Is., Hainan, India, Jawa, Kazan-retto, Laccadive Is., Lesser Sunda Is., Malaya, Maldives, Maluku, Myanmar, Nansei-shoto, New Guinea, Nicobar Is., Northern Territory, Ogasawara-shoto, Philippines, Queensland, Santa Cruz Is., Solomon Is., South China Sea, Sri Lanka, Sulawesi, Sumat…	Sp. Pl.: 176 (1753)	0	L.	0	Linné, Carl von;Linnaeus, Carl
Morus alba		1753	1753	L.	China North-Central, China South-Central	Sp. Pl.: 986 (1753)	1	L.	0	Linné, Carl von;Linnaeus, Carl
Morus indica		1753	1753	L.	Andaman Is., Assam, Bangladesh, China North-Central, China South-Central, China Southeast, East Himalaya, Hainan, India, Japan, Korea, Kuril Is., Laos, Manchuria, Myanmar, Nepal, Ogasawara-shoto, Sakhalin, South China Sea, Taiwan, Thailand, Tibet, Vietnam	Sp. Pl.: 986 (1753)	0	L.	0	Linné, Carl von;Linnaeus, Carl
Murdannia nudiflora	Commelina nudiflora	1753	1952	(L.) Brenan	Andaman Is., Assam, Bangladesh, Bismarck Archipelago, Borneo, Cambodia, Caroline Is., China South-Central, China Southeast, East Himalaya, India, Jawa, Laos, Lesser Sunda Is., Malaya, Myanmar, Nansei-shoto, Nepal, New Guinea, Nicobar Is., Pakistan, Philippines, Samoa, Sri Lanka, Thailand, Vietnam, West Himalaya, Western Australia	Kew Bull. 7: 189 (1952)	0	L.	0	Linné, Carl von;Linnaeus, Carl
Myriophyllum spicatum		1753	1753	L.	Afghanistan, Albania, Aleutian Is., Algeria, Altay, Austria, Baleares, Baltic States, Belarus, Belgium, Botswana, Bulgaria, Cameroon, Canary Is., Cape Provinces, Central European Rus, China North-Central, China South-Central, China Southeast, Corse, Czechoslovakia, Denmark, East Aegean Is., East European Russia, East Himalaya, Egypt, Eritrea, Ethiopia, Finland, France, Free State, Germany, Great …	Sp. Pl.: 992 (1753)	0	L.	0	Linné, Carl von;Linnaeus, Carl
Myriophyllum verticillatum		1753	1753	L.	Afghanistan, Albania, Algeria, Altay, Amur, Austria, Baleares, Baltic States, Belarus, Belgium, Bulgaria, Buryatiya, Central European Rus, China North-Central, China South-Central, Chita, Colorado, Czechoslovakia, Denmark, East European Russia, Finland, France, Germany, Great Britain, Greece, Hainan, Hungary, Iceland, Illinois, Inner Mongolia, Iran, Iraq, Ireland, Irkutsk, Italy, Japan, Kamchatka…	Sp. Pl.: 992 (1753)	0	L.	0	Linné, Carl von;Linnaeus, Carl
Myrsine africana		1753	1753	L.	Afghanistan, Angola, Azores, Cape Provinces, China North-Central, China South-Central, China Southeast, Eritrea, Ethiopia, Free State, India, Kenya, KwaZulu-Natal, Lesotho, Malawi, Mozambique, Northern Provinces, Pakistan, Rwanda, Saudi Arabia, Somalia, Sudan, Swaziland, Taiwan, Tanzania, Tibet, Uganda, Yemen, Zambia, Zaïre, Zimbabwe; Extinct in: Socotra	Sp. Pl.: 196 (1753)	0	L.	0	Linné, Carl von;Linnaeus, Carl
Najas marina		1753	1753	L.	Algeria, Altay, Amur, Argentina Northeast, Argentina Northwest, Arizona, Aruba, Assam, Austria, Bahamas, Baleares, Baltic States, Bangladesh, Belarus, Belgium, Bolivia, Botswana, Brazil North, Brazil Northeast, Brazil Southeast, Bulgaria, Burundi, Buryatiya, California, Canary Is., Cape Provinces, Central American Pac, Central European Rus, China North-Central, China South-Central, China Southeas…	Sp. Pl.: 1015 (1753)	0	L.	0	Linné, Carl von;Linnaeus, Carl
Narcissus tazetta		1753	1753	L.	Afghanistan, Albania, Algeria, Baleares, Canary Is., China Southeast, Corse, Cyprus, East Aegean Is., Egypt, France, Greece, Iran, Iraq, Italy, Japan, Kriti, Lebanon-Syria, Libya, Morocco, Palestine, Sardegna, Sicilia, Sinai, Spain, Tunisia, Turkey, Turkmenistan, Uzbekistan, Yugoslavia	Sp. Pl.: 290 (1753)	0	L.	0	Linné, Carl von;Linnaeus, Carl
Neottia camtschatea	Ophrys camtschatea	1753	1851	(L.) Rchb.f.	Altay, Buryatiya, China North-Central, Inner Mongolia, Irkutsk, Kazakhstan, Khabarovsk, Kirgizstan, Mongolia, Qinghai, Tadzhikistan, Tuva, Xinjiang, Yakutskiya	H.G.L.Reichenbach, Icon. Fl. Germ. Helv. 13-14: 146 (1851)	0	L.	0	Linné, Carl von;Linnaeus, Carl
Nepeta cataria		1753	1753	L.	Afghanistan, Albania, Altay, Baleares, Baltic States, Belarus, Bulgaria, Central European Rus, China North-Central, China South-Central, Corse, East European Russia, France, Greece, Iran, Iraq, Italy, Kazakhstan, Kirgizstan, Korea, Krym, Lebanon-Syria, Nepal, North Caucasus, North European Russi, Northwest European R, Pakistan, Portugal, Romania, Sicilia, South European Russi, Spain, Switzerland,…	Sp. Pl.: 570 (1753)	0	L.	0	Linné, Carl von;Linnaeus, Carl
Nepeta multifida		1753	1753	L.	Altay, Amur, Buryatiya, China North-Central, Chita, Inner Mongolia, Irkutsk, Khabarovsk, Korea, Krasnoyarsk, Mongolia, Primorye, Tuva, West Siberia, Yakutskiya	Sp. Pl.: 572 (1753)	0	L.	0	Linné, Carl von;Linnaeus, Carl
Nepeta nuda		1753	1753	L.	Albania, Altay, Austria, Bulgaria, Central European Rus, Czechoslovakia, East European Russia, France, Greece, Hungary, Iran, Italy, Kazakhstan, Kirgizstan, Krasnoyarsk, Krym, Lebanon-Syria, North Caucasus, Poland, Portugal, Romania, South European Russi, Spain, Switzerland, Tadzhikistan, Transcaucasus, Turkey, Turkey-in-Europe, Ukraine, West Siberia, Xinjiang, Yugoslavia	Sp. Pl.: 570 (1753)	0	L.	0	Linné, Carl von;Linnaeus, Carl
Nepeta sibirica		1753	1753	L.	Altay, China North-Central, Inner Mongolia, Kazakhstan, Khabarovsk, Krasnoyarsk, Mongolia, Qinghai, Tuva, West Siberia	Sp. Pl.: 572 (1753)	0	L.	0	Linné, Carl von;Linnaeus, Carl
Nepeta ucranica		1753	1753	L.	Altay, Bulgaria, Central European Rus, Iran, Kazakhstan, Kirgizstan, Krym, Romania, South European Russi, Tadzhikistan, Transcaucasus, Turkmenistan, Ukraine, Uzbekistan, West Siberia, Xinjiang	Sp. Pl.: 570 (1753)	0	L.	0	Linné, Carl von;Linnaeus, Carl
Nephrolepis cordifolia	Polypodium cordifolium	1753	1836	(L.) C.Presl	Bangladesh, Borneo, Cambodia, Caroline Is., China South-Central, China Southeast, Comoros, East Himalaya, Hainan, Hawaii, India, Japan, Jawa, Kazan-retto, Kermadec Is., Korea, Laos, Lesser Sunda Is., Madeira, Malaya, Mauritius, Myanmar, Nansei-shoto, Nepal, New Caledonia, New South Wales, New Zealand North, Norfolk Is., Ogasawara-shoto, Philippines, Queensland, Réunion, Seychelles, Society Is., S…	Tent. Pterid.: 79 (1836)	0	L.	0	Linné, Carl von;Linnaeus, Carl
Neslia paniculata	Myagrum paniculatum	1753	1815	(L.) Desv.	Altay, Amur, Austria, Baltic States, Belarus, Bulgaria, Buryatiya, Central European Rus, Chita, Cyprus, Czechoslovakia, Denmark, East European Russia, France, Germany, Hungary, Inner Mongolia, Irkutsk, Italy, Kamchatka, Kazakhstan, Khabarovsk, Kirgizstan, Krasnoyarsk, Magadan, Manchuria, Mongolia, Northwest European R, Poland, Primorye, Romania, Sakhalin, South European Russi, Sweden, Switzerland…	J. Bot. Agric. 3: 162 (1815)	0	L.	0	Linné, Carl von;Linnaeus, Carl
Noccaea perfoliata	Thlaspi perfoliatum	1753	2014	(L.) Al-Shehbaz	Afghanistan, Albania, Algeria, Altay, Austria, Baleares, Belgium, Bulgaria, Central European Rus, Corse, Cyprus, Czechoslovakia, East Aegean Is., France, Germany, Great Britain, Greece, Hungary, Iran, Iraq, Italy, Kazakhstan, Kirgizstan, Kriti, Krym, Lebanon-Syria, Libya, Morocco, Netherlands, North Caucasus, Palestine, Poland, Portugal, Romania, Sardegna, Saudi Arabia, Sicilia, South European Ru…	Harvard Pap. Bot. 19: 44 (2014)	0	L.	0	Linné, Carl von;Linnaeus, Carl
Nuphar lutea	Nymphaea lutea	1753	1809	(L.) Sm.	Albania, Algeria, Altay, Austria, Baltic States, Belarus, Belgium, Bulgaria, Central European Rus, Czechoslovakia, Denmark, East European Russia, Finland, France, Germany, Great Britain, Greece, Hungary, Iran, Ireland, Irkutsk, Italy, Kazakhstan, Krasnoyarsk, Lebanon-Syria, Netherlands, North European Russi, Northwest European R, Norway, Palestine, Poland, Portugal, Romania, Sardegna, South Europ…	J.Sibthorp &amp; J.E.Smith, Fl. Graec. Prodr. 1: 361 (1809)	0	L.	0	Linné, Carl von;Linnaeus, Carl
Nymphoides indica	Menyanthes indica	1753	1891	(L.) Kuntze	Assam, Bangladesh, Cambodia, China South-Central, China Southeast, Fiji, Hainan, India, Iran, Iraq, Korea, Laos, Lesser Sunda Is., Malaya, Manchuria, Myanmar, Nepal, New Caledonia, Sri Lanka, Taiwan, Thailand, Vanuatu, Vietnam	Revis. Gen. Pl. 2: 429 (1891)	0	L.	0	Linné, Carl von;Linnaeus, Carl
Ocimum basilicum		1753	1753	L.	Andaman Is., Assam, Bangladesh, Borneo, Cambodia, China South-Central, China Southeast, East Himalaya, India, Jawa, Laos, Lesser Sunda Is., Malaya, Maluku, Myanmar, Nepal, New Guinea, Nicobar Is., Philippines, Sri Lanka, Sulawesi, Sumatera, Taiwan, Thailand, Vietnam, West Himalaya	Sp. Pl.: 597 (1753)	0	L.	0	Linné, Carl von;Linnaeus, Carl
Ocimum gratissimum		1753	1753	L.	Aldabra, Andaman Is., Angola, Assam, Bangladesh, Bismarck Archipelago, Botswana, Burundi, Cambodia, Cameroon, Caprivi Strip, Central African Repu, China Southeast, Comoros, Congo, Djibouti, Equatorial Guinea, Eritrea, Ethiopia, Gabon, Ghana, Guinea, Gulf of Guinea Is., India, Ivory Coast, Jawa, Kenya, KwaZulu-Natal, Laccadive Is., Laos, Liberia, Madagascar, Malawi, Malaya, Maldives, Mauritius, Mo…	Sp. Pl.: 1197 (1753)	0	L.	0	Linné, Carl von;Linnaeus, Carl
Ocimum tenuiflorum		1753	1753	L.	Andaman Is., Assam, Bangladesh, Borneo, Cambodia, China South-Central, China Southeast, East Himalaya, Hainan, India, Jawa, Laos, Lesser Sunda Is., Malaya, Maluku, Myanmar, Nepal, New Guinea, Nicobar Is., Pakistan, Philippines, Queensland, South China Sea, Sri Lanka, Sulawesi, Sumatera, Taiwan, Thailand, Vietnam, West Himalaya	Sp. Pl.: 597 (1753)	0	L.	0	Linné, Carl von;Linnaeus, Carl
Odontosoria chinensis	Trichomanes chinense	1753	1857	(L.) J.Sm.	Assam, Bangladesh, Borneo, Caroline Is., China South-Central, China Southeast, Comoros, Cook Is., East Himalaya, Fiji, Hainan, Hawaii, India, Japan, Kazan-retto, Korea, Laos, Lesser Sunda Is., Malaya, Maluku, Marquesas, Mauritius, Myanmar, Nansei-shoto, Nepal, New Caledonia, Ogasawara-shoto, Philippines, Réunion, Samoa, Society Is., Sri Lanka, Sulawesi, Sumatera, Taiwan, Thailand, Tibet, Tonga, T…	Bot. Voy. Herald 10: 430 (1857)	0	L.	0	Linné, Carl von;Linnaeus, Carl
Oldenlandia corymbosa		1753	1753	L.	Andaman Is., Angola, Assam, Bangladesh, Benin, Borneo, Botswana, Burkina, Burundi, Cameroon, Cape Verde, Central African Repu, Chad, China South-Central, China Southeast, Congo, East Himalaya, Egypt, Eritrea, Ethiopia, Gabon, Gambia, Ghana, Guinea, Guinea-Bissau, Gulf of Guinea Is., Hainan, India, Ivory Coast, Jawa, Kenya, Korea, KwaZulu-Natal, Laccadive Is., Lebanon-Syria, Liberia, Madagascar, M…	Sp. Pl.: 119 (1753)	0	L.	0	Linné, Carl von;Linnaeus, Carl
Oldenlandia paniculata		1753	1753	L.	China Southeast, Hainan, Malaya, Philippines, Taiwan, Thailand, Vietnam	Sp. Pl.: 1667 (1753)	0	L.	0	Linné, Carl von;Linnaeus, Carl
Olea europaea		1753	1753	L.	Afghanistan, Albania, Algeria, Angola, Baleares, Botswana, Burundi, Canary Is., Cape Provinces, China South-Central, Cyprus, Djibouti, East Aegean Is., Eritrea, Ethiopia, Free State, Greece, Italy, Kenya, Kriti, KwaZulu-Natal, Lesotho, Libya, Madeira, Malawi, Mauritius, Morocco, Mozambique, Namibia, Nepal, Niger, Northern Provinces, Oman, Pakistan, Palestine, Portugal, Rwanda, Réunion, Sardegna, …	Sp. Pl.: 8 (1753)	0	L.	0	Linné, Carl von;Linnaeus, Carl
Omalotheca sylvatica	Gnaphalium sylvaticum	1753	1861	(L.) Sch.Bip. & F.W.Schultz	Albania, Altay, Austria, Baltic States, Belarus, Belgium, British Columbia, Bulgaria, Buryatiya, Central European Rus, Corse, Czechoslovakia, Denmark, East European Russia, Finland, France, Germany, Great Britain, Greece, Hungary, Iceland, Iran, Ireland, Irkutsk, Italy, Kamchatka, Kazakhstan, Khabarovsk, Krasnoyarsk, Krym, Kuril Is., Maine, Michigan, Netherlands, New Brunswick, New Hampshire, New…	Arch. Fl. 2: 311 (1861)	0	L.	0	Linné, Carl von;Linnaeus, Carl
Onoclea sensibilis		1753	1753	L.	Alabama, Arkansas, China North-Central, China Southeast, Chita, Colorado, Connecticut, Delaware, District of Columbia, Florida, Georgia, Illinois, Indiana, Inner Mongolia, Iowa, Japan, Kansas, Kentucky, Korea, Kuril Is., Labrador, Louisiana, Maine, Manchuria, Manitoba, Maryland, Masachusettes, Michigan, Minnesota, Mississippi, Missouri, Nebraska, New Brunswick, New Hampshire, New Jersey, New York…	Sp. Pl.: 1062 (1753)	0	L.	0	Linné, Carl von;Linnaeus, Carl
Onoclea struthiopteris	Osmunda struthiopteris	1753	1794	(L.) Roth	Altay, Amur, Austria, Baltic States, Belarus, Belgium, Buryatiya, Central European Rus, China North-Central, China South-Central, China Southeast, Chita, Czechoslovakia, Denmark, East European Russia, Finland, Germany, Hungary, Iran, Irkutsk, Italy, Japan, Kamchatka, Kazakhstan, Khabarovsk, Kirgizstan, Korea, Krasnoyarsk, Kuril Is., Magadan, Manchuria, Mongolia, North European Russi, Northwest Eu…	Ann. Bot. (Usteri) 10: 54 (1794)	0	L.	0	Linné, Carl von;Linnaeus, Carl
Ononis spinosa		1753	1753	L.	Albania, Algeria, Austria, Baleares, Baltic States, Belarus, Belgium, Bulgaria, Central European Rus, Corse, Cyprus, Czechoslovakia, Denmark, East Aegean Is., East European Russia, France, Germany, Great Britain, Greece, Hungary, Iran, Iraq, Ireland, Italy, Kazakhstan, Kirgizstan, Kriti, Krym, Lebanon-Syria, Libya, Morocco, Netherlands, North Caucasus, Northwest European R, Norway, Pakistan, Pale…	Sp. Pl.: 716 (1753)	0	L.	0	Linné, Carl von;Linnaeus, Carl
Onopordum acanthium		1753	1753	L.	Afghanistan, Albania, Algeria, Altay, Austria, Baltic States, Belarus, Belgium, Bulgaria, Central European Rus, Corse, Czechoslovakia, Denmark, East European Russia, France, Germany, Great Britain, Greece, Hungary, Iran, Iraq, Ireland, Italy, Kazakhstan, Kirgizstan, Krym, Netherlands, North Caucasus, Northwest European R, Norway, Pakistan, Poland, Portugal, Romania, Saudi Arabia, South European R…	Sp. Pl.: 827 (1753)	0	L.	0	Linné, Carl von;Linnaeus, Carl
Operculina turpethum	Convolvulus turpethum	1753	1836	(L.) Silva Manso	Assam, Bangladesh, Borneo, Cambodia, Caroline Is., China South-Central, China Southeast, Comoros, Cook Is., East Himalaya, Fiji, Hainan, Hawaii, India, Kenya, Laos, Lesser Sunda Is., Madagascar, Malaya, Maluku, Marquesas, Mozambique, Myanmar, Nansei-shoto, Nepal, New Caledonia, New Guinea, Niue, Northern Territory, Pakistan, Philippines, Pitcairn Is., Queensland, Samoa, Seychelles, Society Is., S…	Enum. Subst. Braz.: 16 (1836)	0	L.	0	Linné, Carl von;Linnaeus, Carl
Ophioglossum reticulatum		1753	1753	L.	Angola, Argentina Northeast, Argentina Northwest, Assam, Bangladesh, Bolivia, Borneo, Brazil Northeast, Brazil South, Brazil Southeast, Brazil West-Central, Burundi, Cambodia, Cameroon, Cape Provinces, Cape Verde, Central African Repu, Chad, China North-Central, China South-Central, China Southeast, Colombia, Comoros, Costa Rica, Cuba, Dominican Republic, East Himalaya, Ecuador, El Salvador, Equa…	Sp. Pl.: 1063 (1753)	0	L.	0	Linné, Carl von;Linnaeus, Carl
Ophioglossum vulgatum		1753	1753	L.	Alabama, Albania, Algeria, Altay, Argentina South, Arizona, Arkansas, Austria, Baltic States, Belarus, Belgium, Bulgaria, Buryatiya, Central European Rus, Chile South, China North-Central, China South-Central, China Southeast, Corse, Cyprus, Czechoslovakia, Delaware, Denmark, District of Columbia, East European Russia, Finland, France, Georgia, Germany, Great Britain, Greece, Hungary, Illinois, I…	Sp. Pl.: 1062 (1753)	0	L.	0	Linné, Carl von;Linnaeus, Carl
Oplismenus compositus	Panicum compositum	1753	1812	(L.) P.Beauv.	Alabama, Andaman Is., Argentina Northeast, Argentina Northwest, Arkansas, Assam, Bangladesh, Belize, Bermuda, Bismarck Archipelago, Borneo, Brazil South, Burundi, Cambodia, China South-Central, China Southeast, Christmas I., Colombia, Comoros, Costa Rica, Cuba, Dominican Republic, East Himalaya, Ecuador, El Salvador, Equatorial Guinea, Eritrea, Ethiopia, Florida, Georgia, Guatemala, Hainan, Haiti…	Ess. Agrostogr.: 54 (1812)	0	L.	0	Linné, Carl von;Linnaeus, Carl
Orchis militaris		1753	1753	L.	Afghanistan, Albania, Altay, Austria, Baltic States, Belarus, Belgium, Bulgaria, Buryatiya, Central European Rus, Chita, Czechoslovakia, East European Russia, France, Germany, Great Britain, Greece, Hungary, Iran, Irkutsk, Italy, Kazakhstan, Krasnoyarsk, Krym, Mongolia, North Caucasus, North European Russi, Northwest European R, Poland, Romania, South European Russi, Spain, Sweden, Switzerland, T…	Sp. Pl.: 941 (1753)	0	L.	0	Linné, Carl von;Linnaeus, Carl
Origanum vulgare		1753	1753	L.	Afghanistan, Albania, Algeria, Altay, Austria, Azores, Baleares, Baltic States, Belarus, Belgium, Bulgaria, Buryatiya, Canary Is., Central European Rus, China North-Central, China South-Central, China Southeast, Corse, Cyprus, Czechoslovakia, Denmark, East Aegean Is., East European Russia, East European Russia, East Himalaya, Finland, France, Germany, Great Britain, Greece, Hungary, India, Iran, …	Sp. Pl.: 590 (1753)	0	L.	0	Linné, Carl von;Linnaeus, Carl
Orostachys spinosa	Cotyledon spinosa	1753	1830	(L.) Sweet	Altay, Amur, Buryatiya, China North-Central, Chita, East European Russia, Inner Mongolia, Irkutsk, Kazakhstan, Khabarovsk, Krasnoyarsk, Magadan, Manchuria, Mongolia, Primorye, Tibet, Tuva, West Siberia, Xinjiang, Yakutskiya	Hort. Brit., ed. 2: 225 (1830)	0	L.	0	Linné, Carl von;Linnaeus, Carl
Oroxylum indicum	Bignonia indica	1753	1877	(L.) Kurz	Andaman Is., Assam, Bangladesh, Cambodia, China Southeast, East Himalaya, India, Jawa, Laos, Lesser Sunda Is., Malaya, Myanmar, Nepal, Philippines, Sri Lanka, Sulawesi, Sumatera, Thailand, Vietnam	Forest Fl. Burma 2: 237 (1877)	0	L.	0	Linné, Carl von;Linnaeus, Carl
Orthilia secunda	Pyrola secunda	1753	1921	(L.) House	Alaska, Albania, Alberta, Altay, Amur, Arizona, Austria, Baltic States, Belarus, British Columbia, Bulgaria, Buryatiya, California, Central European Rus, China North-Central, China South-Central, Chita, Colorado, Connecticut, Czechoslovakia, Delaware, Denmark, East European Russia, Finland, France, Germany, Great Britain, Greece, Greenland, Guatemala, Hungary, Iceland, Idaho, Illinois, Indiana, I…	Amer. Midl. Naturalist 7: 134 (1921)	0	L.	0	Linné, Carl von;Linnaeus, Carl
Orychophragmus violaceus	Brassica violacea	1753	1916	(L.) O.E.Schulz	China North-Central, China Southeast, Inner Mongolia, Korea, Manchuria	Beibl. Bot. Jahrb. Syst. 119: 56 (1916)	0	L.	0	Linné, Carl von;Linnaeus, Carl
Oryza sativa		1753	1753	L.	China North-Central, China South-Central, China Southeast	Sp. Pl.: 333 (1753)	1	L.	0	Linné, Carl von;Linnaeus, Carl
Osbeckia chinensis		1753	1753	L.	Cambodia, China South-Central, China Southeast, East Himalaya, Hainan, Japan, Jawa, Laos, Malaya, Myanmar, Nansei-shoto, Nepal, Northern Territory, Philippines, Queensland, Taiwan, Thailand, Vietnam, West Himalaya	Sp. Pl.: 345 (1753)	0	L.	0	Linné, Carl von;Linnaeus, Carl
Osmundastrum cinnamomeum	Osmunda cinnamomea	1753	1847	(L.) C.Presl	Alabama, Amur, Argentina Northeast, Arkansas, Assam, Bermuda, Bolivia, Brazil Northeast, Brazil South, Brazil Southeast, China South-Central, China Southeast, Colombia, Connecticut, Costa Rica, Cuba, Delaware, District of Columbia, East Himalaya, Ecuador, El Salvador, Florida, Georgia, Guatemala, Haiti, Honduras, Illinois, Indiana, Iowa, Jamaica, Japan, Kamchatka, Kentucky, Khabarovsk, Korea, Kur…	Gefässbundel Farrn: 18 (1847)	0	L.	0	Linné, Carl von;Linnaeus, Carl
Ottelia alismoides	Stratiotes alismoides	1753	1805	(L.) Pers.	Assam, Bangladesh, Borneo, Cambodia, China North-Central, China South-Central, China Southeast, Hainan, India, Japan, Jawa, Khabarovsk, Korea, Lesser Sunda Is., Malaya, Maluku, Manchuria, Myanmar, Nansei-shoto, Nepal, New Guinea, Northern Territory, Philippines, Primorye, Queensland, Solomon Is., Sri Lanka, Sulawesi, Sumatera, Taiwan, Thailand, Vietnam	Syn. Pl. 1: 400 (1805)	0	L.	0	Linné, Carl von;Linnaeus, Carl
Oxalis acetosella		1753	1753	L.	Albania, Altay, Amur, Austria, Baltic States, Belarus, Belgium, Bulgaria, Buryatiya, Central European Rus, China South-Central, Corse, Czechoslovakia, Denmark, East European Russia, East Himalaya, Finland, France, Føroyar, Germany, Great Britain, Greece, Hungary, Iceland, Inner Mongolia, Ireland, Irkutsk, Italy, Japan, Kamchatka, Kazakhstan, Khabarovsk, Korea, Krasnoyarsk, Kuril Is., Manchuria, M…	Sp. Pl.: 433 (1753)	0	L.	0	Linné, Carl von;Linnaeus, Carl
Oxalis stricta		1753	1753	L.	Alabama, Arkansas, British Columbia, China North-Central, China South-Central, China Southeast, Colorado, Connecticut, Delaware, District of Columbia, Georgia, Idaho, Illinois, Indiana, Iowa, Japan, Kansas, Kentucky, Korea, Louisiana, Maine, Manchuria, Manitoba, Maryland, Masachusettes, Mexico Northeast, Mexico Northwest, Michigan, Minnesota, Mississippi, Missouri, Nebraska, New Brunswick, New Ha…	Sp. Pl.: 435 (1753)	0	L.	0	Linné, Carl von;Linnaeus, Carl
Oxybasis glauca	Chenopodium glaucum	1753	2012	(L.) S.Fuentes, Uotila & Borsch	Afghanistan, Albania, Altay, Amur, Austria, Baltic States, Belarus, Belgium, Bulgaria, Buryatiya, Central European Rus, China South-Central, China Southeast, Chita, Czechoslovakia, Denmark, East European Russia, Finland, France, Germany, Great Britain, Greece, Hungary, Iran, Irkutsk, Italy, Kamchatka, Kazakhstan, Khabarovsk, Kirgizstan, Krasnoyarsk, Krym, Magadan, Mongolia, Nepal, Netherlands, Ne…	Willdenowia 42: 15 (2012)	0	L.	0	Linné, Carl von;Linnaeus, Carl
Oxybasis rubra	Chenopodium rubrum	1753	2012	(L.) S.Fuentes, Uotila & Borsch	Afghanistan, Alaska, Albania, Alberta, Altay, Amur, Arizona, Austria, Baltic States, Belarus, Belgium, British Columbia, Buryatiya, California, Central European Rus, China North-Central, Chita, Colorado, Connecticut, Cyprus, Czechoslovakia, Denmark, East European Russia, Finland, France, Germany, Great Britain, Hungary, Idaho, Inner Mongolia, Iowa, Iran, Ireland, Irkutsk, Italy, Kansas, Kazakhsta…	Willdenowia 42: 15 (2012)	0	L.	0	Linné, Carl von;Linnaeus, Carl
Oxybasis urbica	Chenopodium urbicum	1753	2012	(L.) S.Fuentes, Uotila & Borsch	Afghanistan, Albania, Altay, Amur, Austria, Baltic States, Belarus, Belgium, Bulgaria, Buryatiya, Central European Rus, China North-Central, Chita, Corse, Cyprus, Czechoslovakia, East Aegean Is., Germany, Greece, Hungary, Inner Mongolia, Iran, Iraq, Irkutsk, Italy, Kamchatka, Kazakhstan, Kirgizstan, Krasnoyarsk, Krym, Lebanon-Syria, Manchuria, North Caucasus, North European Russi, Northwest Europ…	Willdenowia 42: 15 (2012)	0	L.	0	Linné, Carl von;Linnaeus, Carl
Oxyria digyna	Rumex digynus	1753	1768	(L.) Hill	Afghanistan, Alaska, Albania, Alberta, Aleutian Is., Altay, Arizona, Austria, British Columbia, Bulgaria, California, China North-Central, China South-Central, Chita, Colorado, Corse, Czechoslovakia, East European Russia, East Himalaya, Finland, France, Germany, Great Britain, Greece, Greenland, Iceland, Idaho, Iran, Iraq, Ireland, Irkutsk, Italy, Japan, Kamchatka, Kazakhstan, Khabarovsk, Kirgizs…	Hort. Kew.: 158 (1768)	0	L.	0	Linné, Carl von;Linnaeus, Carl
Oxytropis pilosa	Astragalus pilosus	1753	1802	(L.) DC.	Albania, Altay, Baltic States, Belarus, Bulgaria, Buryatiya, Central European Rus, Czechoslovakia, East European Russia, France, Germany, Greece, Hungary, Iran, Irkutsk, Italy, Kazakhstan, Krasnoyarsk, Krym, North Caucasus, Northwest European R, Poland, Romania, South European Russi, Sweden, Switzerland, Transcaucasus, Turkey, Tuva, Ukraine, West Siberia, Xinjiang, Yakutskiya, Yugoslavia	Astragalogia: 91 (1802)	0	L.	0	Linné, Carl von;Linnaeus, Carl
Panicum brevifolium		1753	1753	L.	Assam, Bangladesh, Benin, Borneo, Burkina, Burundi, Cambodia, Cameroon, Central African Repu, China South-Central, China Southeast, Congo, East Himalaya, Gabon, Ghana, Guinea, Guinea-Bissau, Gulf of Guinea Is., India, Ivory Coast, Jawa, Kenya, Laos, Liberia, Madagascar, Malawi, Malaya, Mauritius, Mozambique, Myanmar, Nigeria, Philippines, Rwanda, Réunion, Senegal, Seychelles, Sierra Leone, Sri La…	Sp. Pl.: 59 (1753)	0	L.	0	Linné, Carl von;Linnaeus, Carl
Panzerina lanata	Ballota lanata	1753	1981	(L.) Soják	Altay, Buryatiya, Chita, Inner Mongolia, Irkutsk, Krasnoyarsk, Manchuria, Mongolia, Tuva, Xinjiang	Cas. Nár. Mus., Odd. Prír. 150: 216 (1981 publ. 1982)	0	L.	0	Linné, Carl von;Linnaeus, Carl
Parasenecio hastatus	Cacalia hastata	1753	1995	(L.) H.Koyama	Altay, Amur, Buryatiya, China North-Central, Chita, East European Russia, Inner Mongolia, Irkutsk, Japan, Kamchatka, Kazakhstan, Khabarovsk, Korea, Krasnoyarsk, Kuril Is., Magadan, Manchuria, Mongolia, North European Russi, Primorye, Sakhalin, Tuva, West Siberia	Fl. Jap. 3b: 52 (1995)	0	L.	0	Linné, Carl von;Linnaeus, Carl
Paris quadrifolia		1753	1753	L.	Altay, Austria, Baltic States, Belarus, Belgium, Bulgaria, Buryatiya, Central European Rus, Chita, Corse, Czechoslovakia, Denmark, East European Russia, Finland, France, Germany, Great Britain, Greece, Hungary, Iceland, Inner Mongolia, Irkutsk, Italy, Kazakhstan, Krasnoyarsk, Manchuria, Mongolia, Netherlands, North Caucasus, North European Russi, Northwest European R, Norway, Poland, Romania, Sar…	Sp. Pl.: 367 (1753)	0	L.	0	Linné, Carl von;Linnaeus, Carl
Parnassia palustris		1753	1753	L.	Afghanistan, Alaska, Albania, Alberta, Aleutian Is., Altay, Amur, Arizona, Austria, Baltic States, Belarus, Belgium, British Columbia, Bulgaria, Buryatiya, California, Central European Rus, China North-Central, Chita, Colorado, Czechoslovakia, Denmark, East European Russia, Finland, France, Germany, Great Britain, Greece, Hungary, Iceland, Idaho, Inner Mongolia, Iran, Iraq, Ireland, Irkutsk, Ital…	Sp. Pl.: 273 (1753)	0	L.	0	Linné, Carl von;Linnaeus, Carl
Parrya nudicaulis	Cardamine nudicaulis	1753	1862	(L.) Regel	Afghanistan, Alaska, Aleutian Is., Buryatiya, Chita, East European Russia, East Himalaya, Irkutsk, Kamchatka, Khabarovsk, Krasnoyarsk, Kuril Is., Magadan, North European Russi, Northwest Territorie, Qinghai, Tibet, Tuva, West Himalaya, West Siberia, Yakutskiya, Yukon; Extinct in: British Columbia	Bull. Soc. Imp. Naturalistes Moscou 34(II): 176 (1862)	0	L.	0	Linné, Carl von;Linnaeus, Carl
Patrinia sibirica	Valeriana sibirica	1753	1807	(L.) Juss.	Altay, Amur, Buryatiya, Chita, East European Russia, Inner Mongolia, Irkutsk, Japan, Kazakhstan, Khabarovsk, Krasnoyarsk, Kuril Is., Magadan, Manchuria, Mongolia, Primorye, Sakhalin, Tuva, West Siberia, Yakutskiya	Ann. Mus. Hist. Nat. 10: 311 (1807)	0	L.	0	Linné, Carl von;Linnaeus, Carl
Pecteilis susannae	Orchis susannae	1753	1837	(L.) Raf.	Assam, Borneo, Cambodia, China South-Central, China Southeast, East Himalaya, Hainan, Jawa, Laos, Lesser Sunda Is., Malaya, Maluku, Myanmar, Nepal, New Guinea, Sulawesi, Thailand, Vietnam	Fl. Tellur. 2: 38 (1837)	0	L.	0	Linné, Carl von;Linnaeus, Carl
Pedicularis palustris		1753	1753	L.	Austria, Baltic States, Belgium, Bulgaria, Central European Rus, Czechoslovakia, Denmark, East European Russia, Finland, France, Føroyar, Germany, Great Britain, Hungary, Ireland, Italy, Kazakhstan, Mongolia, Netherlands, Newfoundland, North European Russi, Northwest European R, Norway, Nova Scotia, Poland, Québec, Romania, Sweden, Switzerland, Ukraine, Xinjiang, Yugoslavia	Sp. Pl.: 607 (1753)	0	L.	0	Linné, Carl von;Linnaeus, Carl
Pedicularis resupinata		1753	1753	L.	Altay, Amur, Buryatiya, China North-Central, China South-Central, China Southeast, Chita, East European Russia, Inner Mongolia, Irkutsk, Japan, Kamchatka, Kazakhstan, Khabarovsk, Korea, Krasnoyarsk, Kuril Is., Magadan, Manchuria, Mongolia, Primorye, Sakhalin, Tuva, West Siberia, Yakutskiya	Sp. Pl.: 608 (1753)	0	L.	0	Linné, Carl von;Linnaeus, Carl
Pedicularis tristis		1753	1753	L.	Altay, Buryatiya, China North-Central, Chita, Irkutsk, Kamchatka, Kazakhstan, Khabarovsk, Krasnoyarsk, Magadan, Mongolia, Tuva, West Siberia, Yakutskiya	Sp. Pl.: 608 (1753)	0	L.	0	Linné, Carl von;Linnaeus, Carl
Pedicularis verticillata		1753	1753	L.	Alaska, Albania, Aleutian Is., Altay, Amur, Austria, British Columbia, Bulgaria, Buryatiya, China North-Central, China South-Central, Chita, Czechoslovakia, East European Russia, France, Germany, Inner Mongolia, Irkutsk, Italy, Japan, Kamchatka, Kazakhstan, Khabarovsk, Korea, Krasnoyarsk, Kuril Is., Magadan, Manchuria, Mongolia, North European Russi, Northwest Territorie, Poland, Primorye, Romani…	Sp. Pl.: 608 (1753)	0	L.	0	Linné, Carl von;Linnaeus, Carl
Peganum harmala		1753	1753	L.	Afghanistan, Algeria, Bangladesh, Bulgaria, China North-Central, Cyprus, East Aegean Is., Egypt, Greece, India, Inner Mongolia, Iran, Iraq, Italy, Kazakhstan, Kirgizstan, Krym, Kuwait, Lebanon-Syria, Libya, Mongolia, Morocco, Pakistan, Palestine, Qinghai, Romania, Sardegna, Saudi Arabia, Sinai, South European Russi, Spain, Tadzhikistan, Tibet, Tunisia, Turkey, Turkey-in-Europe, Turkmenistan, Tuva…	Sp. Pl.: 444 (1753)	0	L.	0	Linné, Carl von;Linnaeus, Carl
Pentanema britannicum	Inula britannica	1753	2018	(L.) D.Gut.Larr., Santos-Vicente, Anderb., E.Rico & M.M.Mart.Ort.	Albania, Altay, Amur, Austria, Baltic States, Belarus, Belgium, Bulgaria, Buryatiya, Central European Rus, China North-Central, China South-Central, China Southeast, Chita, Corse, Czechoslovakia, Denmark, East European Russia, France, Germany, Great Britain, Greece, Hainan, Hungary, Inner Mongolia, Iran, Iraq, Ireland, Irkutsk, Italy, Japan, Kazakhstan, Khabarovsk, Kirgizstan, Korea, Krasnoyarsk,…	Taxon 67(1): 159 (2018)	0	L.	0	Linné, Carl von;Linnaeus, Carl
Pentanema salicinum	Inula salicina	1753	2018	(L.) D.Gut.Larr., Santos-Vicente, Anderb., E.Rico & M.M.Mart.Ort.	Altay, Amur, Austria, Baltic States, Belarus, Belgium, Bulgaria, Buryatiya, Central European Rus, Chita, Corse, Czechoslovakia, Denmark, East European Russia, Finland, France, Germany, Greece, Hungary, Inner Mongolia, Iran, Iraq, Ireland, Irkutsk, Italy, Japan, Kazakhstan, Khabarovsk, Kirgizstan, Korea, Krasnoyarsk, Krym, Kuril Is., Lebanon-Syria, Manchuria, Mongolia, Netherlands, North Caucasus,…	Taxon 67(1): 159 (2018)	0	L.	0	Linné, Carl von;Linnaeus, Carl
Pentapetes phoenicea		1753	1753	L.	Bangladesh, Cambodia, China South-Central, China Southeast, India, Laos, Malaya, Myanmar, Nepal, New Guinea, Philippines, Sri Lanka, Thailand, Vietnam	Sp. Pl.: 698 (1753)	0	L.	0	Linné, Carl von;Linnaeus, Carl
Perilla frutescens	Ocimum frutescens	1753	1894	(L.) Britton	Assam, Bangladesh, China South-Central, China Southeast, East Himalaya, India, Japan, Jawa, Khabarovsk, Korea, Laos, Myanmar, Nepal, Primorye, Taiwan, Thailand, Vietnam, West Himalaya	Mem. Torrey Bot. Club 5: 277 (1894)	0	L.	0	Linné, Carl von;Linnaeus, Carl
Perotis indica	Anthoxanthum indicum	1753	1891	(L.) Kuntze	Bangladesh, Benin, Borneo, Burkina, Cambodia, Cameroon, Central African Repu, Chad, China North-Central, China South-Central, China Southeast, Congo, East Himalaya, Gabon, Gambia, Hainan, India, Ivory Coast, Jawa, Laos, Lesser Sunda Is., Madagascar, Malaya, Maluku, Mauritania, Myanmar, Nepal, New Guinea, Nigeria, Philippines, Sierra Leone, South China Sea, Sri Lanka, Sulawesi, Sumatera, Taiwan, T…	Revis. Gen. Pl. 2: 787 (1891)	0	L.	0	Linné, Carl von;Linnaeus, Carl
Persicaria amphibia	Polygonum amphibium	1753	1800	(L.) Delarbre	Afghanistan, Alabama, Alaska, Albania, Alberta, Algeria, Altay, Amur, Arizona, Arkansas, Austria, Baltic States, Belarus, Belgium, British Columbia, Bulgaria, Buryatiya, California, Cape Provinces, Central European Rus, China North-Central, China South-Central, China Southeast, Chita, Colorado, Connecticut, Corse, Czechoslovakia, Delaware, Denmark, District of Columbia, East European Russia, East…	Fl. Auvergne, ed. 2: 519 (1800)	0	L.	0	Linné, Carl von;Linnaeus, Carl
Persicaria barbata	Polygonum barbatum	1753	1966	(L.) H.Hara	Assam, Bangladesh, Cambodia, China South-Central, China Southeast, East Himalaya, Hainan, India, Iran, Jawa, Laccadive Is., Laos, Malaya, Myanmar, Nansei-shoto, Nepal, New Guinea, Pakistan, Philippines, Saudi Arabia, Sri Lanka, Sumatera, Taiwan, Thailand, Vietnam, West Himalaya, Yemen; Extinct in: Socotra	Fl. E. Himal.: 70 (1966)	0	L.	0	Linné, Carl von;Linnaeus, Carl
Persicaria chinensis	Polygonum chinense	1753	1913	(L.) H.Gross	Assam, Bangladesh, China North-Central, China South-Central, China Southeast, East Himalaya, Hainan, India, Jawa, Korea, Laos, Lesser Sunda Is., Malaya, Myanmar, Nepal, Nicobar Is., Philippines, Sri Lanka, Taiwan, Thailand, Tibet, Vietnam, West Himalaya	Bot. Jahrb. Syst. 49: 269 (1913)	0	L.	0	Linné, Carl von;Linnaeus, Carl
Persicaria hydropiper	Polygonum hydropiper	1753	1800	(L.) Delarbre	Afghanistan, Albania, Algeria, Altay, Amur, Andaman Is., Assam, Austria, Azores, Baltic States, Bangladesh, Belarus, Belgium, Bulgaria, Buryatiya, Central European Rus, China South-Central, China Southeast, Chita, Corse, Czechoslovakia, Denmark, East European Russia, East Himalaya, Finland, France, Germany, Great Britain, Greece, Hainan, Hungary, India, Inner Mongolia, Iran, Ireland, Irkutsk, Ita…	Fl. Auvergne, ed. 2: 518 (1800)	0	L.	0	Linné, Carl von;Linnaeus, Carl
Persicaria lapathifolia	Polygonum lapathifolium	1753	1800	(L.) Delarbre	Afghanistan, Alabama, Alaska, Albania, Alberta, Algeria, Altay, Amur, Arizona, Arkansas, Ascension, Assam, Austria, Azores, Baleares, Baltic States, Bangladesh, Belarus, Belgium, Bulgaria, Buryatiya, California, Central European Rus, China North-Central, China South-Central, China Southeast, Chita, Colorado, Connecticut, Corse, Cyprus, Czechoslovakia, Delaware, Denmark, District of Columbia, East…	Fl. Auvergne, ed. 2: 519 (1800)	0	L.	0	Linné, Carl von;Linnaeus, Carl
Persicaria orientalis	Polygonum orientale	1753	1841	(L.) Spach	Amur, Assam, Bangladesh, Cambodia, China North-Central, China South-Central, China Southeast, East Himalaya, Hainan, India, Japan, Jawa, Khabarovsk, Korea, Lesser Sunda Is., Malaya, Manchuria, Myanmar, New Guinea, New South Wales, Northern Territory, Philippines, Primorye, Queensland, Sri Lanka, Taiwan, Thailand, Vietnam, West Himalaya	Hist. Nat. Vég. 10: 537 (1841)	0	L.	0	Linné, Carl von;Linnaeus, Carl
Persicaria sagittata	Polygonum sagittatum	1753	1919	(L.) H.Gross	Alabama, Altay, Amur, Arkansas, Assam, Buryatiya, China North-Central, China South-Central, China Southeast, Chita, Colorado, Connecticut, Delaware, District of Columbia, Dominican Republic, East Himalaya, Florida, Georgia, Illinois, Indiana, Inner Mongolia, Iowa, Irkutsk, Japan, Kansas, Kentucky, Khabarovsk, Korea, Krasnoyarsk, Kuril Is., Louisiana, Maine, Manchuria, Manitoba, Maryland, Masachus…	Beih. Bot. Centralbl. 37(2): 113 (1919)	0	L.	0	Linné, Carl von;Linnaeus, Carl
Phalaris arundinacea		1753	1753	L.	Afghanistan, Alabama, Alaska, Albania, Alberta, Altay, Amur, Arizona, Arkansas, Austria, Baltic States, Belarus, Belgium, British Columbia, Bulgaria, Buryatiya, California, Central European Rus, China North-Central, China South-Central, China Southeast, Chita, Colorado, Connecticut, Corse, Czechoslovakia, Delaware, Denmark, District of Columbia, East European Russia, East Himalaya, Ethiopia, Finl…	Sp. Pl.: 55 (1753)	0	L.	0	Linné, Carl von;Linnaeus, Carl
Phanera scandens	Bauhinia scandens	1753	1838	(L.) Lour. ex Raf.	Assam, Bangladesh, Cambodia, East Himalaya, Hainan, India, Jawa, Laos, Lesser Sunda Is., Myanmar, Nepal, Sri Lanka, Sumatera, Thailand, Vietnam	Sylva Tellur.: 122 (1838)	0	L.	0	Linné, Carl von;Linnaeus, Carl
Phedimus aizoon	Sedum aizoon	1753	1995	(L.) 't Hart	Altay, Amur, Buryatiya, China North-Central, China South-Central, China Southeast, Chita, Inner Mongolia, Irkutsk, Japan, Kazakhstan, Khabarovsk, Korea, Krasnoyarsk, Kuril Is., Manchuria, Mongolia, North European Russi, Primorye, Sakhalin, Tuva, West Siberia, Yakutskiya	H.&#x27;t Hart &amp; U.Eggli (eds.), Evol. &amp; Syst. Crassulac.: 168 (1995)	0	L.	0	Linné, Carl von;Linnaeus, Carl
Phedimus hybridus	Sedum hybridum	1753	1995	(L.) 't Hart	Altay, Buryatiya, East European Russia, Irkutsk, Kazakhstan, Kirgizstan, Krasnoyarsk, Mongolia, Tuva, West Siberia, Xinjiang, Yakutskiya	H.&#x27;t Hart &amp; U.Eggli (eds.), Evol. &amp; Syst. Crassulac.: 168 (1995)	0	L.	0	Linné, Carl von;Linnaeus, Carl
Phleum alpinum		1753	1753	L.	Afghanistan, Alaska, Albania, Alberta, Aleutian Is., Altay, Argentina Northeast, Argentina Northwest, Argentina South, Arizona, Austria, British Columbia, Bulgaria, California, Chile Central, Chile South, China North-Central, China South-Central, China Southeast, Colorado, Czechoslovakia, East European Russia, East Himalaya, Finland, France, Føroyar, Germany, Great Britain, Greece, Greenland, Gua…	Sp. Pl.: 59 (1753)	0	L.	0	Linné, Carl von;Linnaeus, Carl
Phleum phleoides	Phalaris phleoides	1753	1880	(L.) H.Karst.	Albania, Algeria, Altay, Austria, Baltic States, Belarus, Belgium, Bulgaria, Buryatiya, Central European Rus, Corse, Czechoslovakia, Denmark, East Aegean Is., East European Russia, Finland, France, Germany, Great Britain, Greece, Hungary, Inner Mongolia, Iran, Iraq, Irkutsk, Italy, Kazakhstan, Kirgizstan, Krasnoyarsk, Krym, Libya, Manchuria, Mongolia, Morocco, North Caucasus, Northwest European R…	Deut. Fl.: 374 (1880)	0	L.	0	Linné, Carl von;Linnaeus, Carl
Phlomoides tuberosa	Phlomis tuberosa	1753	1794	(L.) Moench	Albania, Altay, Amur, Austria, Bulgaria, Buryatiya, Central European Rus, Chita, Czechoslovakia, East European Russia, Greece, Hungary, Inner Mongolia, Iran, Irkutsk, Kazakhstan, Khabarovsk, Kirgizstan, Krasnoyarsk, Krym, Manchuria, Mongolia, North Caucasus, Primorye, Romania, South European Russi, Transcaucasus, Turkey, Tuva, Ukraine, West Siberia, Xinjiang, Yakutskiya, Yugoslavia; Extinct in: G…	Methodus: 403 (1794)	0	L.	0	Linné, Carl von;Linnaeus, Carl
Phyla nodiflora	Verbena nodiflora	1753	1899	(L.) Greene	Alabama, Albania, Aldabra, Algeria, Andaman Is., Angola, Argentina Northeast, Argentina Northwest, Argentina South, Arizona, Arkansas, Aruba, Assam, Bahamas, Baleares, Bangladesh, Belize, Benin, Bermuda, Bolivia, Botswana, Brazil North, Brazil Northeast, Brazil South, Brazil Southeast, Brazil West-Central, Burkina, Burundi, California, Cambodia, Cape Provinces, Caprivi Strip, Caroline Is., Cayman…	Pittonia 4: 46 (1899)	0	L.	0	Linné, Carl von;Linnaeus, Carl
Phyllanthus emblica		1753	1753	L.	Assam, Bangladesh, Borneo, Cambodia, China South-Central, China Southeast, East Himalaya, Hainan, India, Jawa, Laos, Lesser Sunda Is., Malaya, Myanmar, Pakistan, Sri Lanka, Sumatera, Taiwan, Thailand, Vietnam, West Himalaya	Sp. Pl.: 982 (1753)	0	L.	0	Linné, Carl von;Linnaeus, Carl
Phyllanthus maderaspatensis		1753	1753	L.	Aldabra, Andaman Is., Angola, Bangladesh, Benin, Botswana, Burkina, Cameroon, Cape Provinces, Cape Verde, Caprivi Strip, Central African Repu, Chad, China Southeast, Djibouti, Eritrea, Ethiopia, Free State, Ghana, Gulf States, India, Ivory Coast, Jawa, Kenya, KwaZulu-Natal, Laccadive Is., Lesotho, Madagascar, Maldives, Mali, Mauritania, Mauritius, Mozambique, Myanmar, Namibia, New Guinea, New Sou…	Sp. Pl.: 982 (1753)	0	L.	0	Linné, Carl von;Linnaeus, Carl
Phyllanthus urinaria		1753	1753	L.	Andaman Is., Assam, Bangladesh, Borneo, Cambodia, China North-Central, China South-Central, China Southeast, East Himalaya, Hainan, India, Japan, Jawa, Korea, Laccadive Is., Laos, Lesser Sunda Is., Malaya, Maldives, Myanmar, Nansei-shoto, New Guinea, Nicobar Is., Northern Territory, Ogasawara-shoto, Pakistan, Philippines, Queensland, South China Sea, Sri Lanka, Sulawesi, Sumatera, Taiwan, Thailan…	Sp. Pl.: 982 (1753)	0	L.	0	Linné, Carl von;Linnaeus, Carl
Phyllodium pulchellum	Hedysarum pulchellum	1753	1826	(L.) Desv.	Assam, Bangladesh, Bismarck Archipelago, Borneo, Cambodia, China South-Central, China Southeast, East Himalaya, Hainan, India, Jawa, Laos, Lesser Sunda Is., Malaya, Maluku, Myanmar, Nansei-shoto, Nepal, New Guinea, Northern Territory, Philippines, Queensland, Sri Lanka, Sulawesi, Sumatera, Taiwan, Thailand, Vietnam, West Himalaya	Mém. Soc. Linn. Paris 4: 324 (1826)	0	L.	0	Linné, Carl von;Linnaeus, Carl
Phyllodoce caerulea	Andromeda caerulea	1753	1843	(L.) Bab.	Alaska, Aleutian Is., Amur, Buryatiya, Chita, Finland, France, Great Britain, Greenland, Iceland, Inner Mongolia, Irkutsk, Kamchatka, Khabarovsk, Korea, Krasnoyarsk, Kuril Is., Labrador, Magadan, Maine, Manchuria, Manitoba, New Hampshire, Newfoundland, North European Russi, Northwest Territorie, Norway, Nova Scotia, Nunavut, Ontario, Québec, Sakhalin, Spain, Sweden, Tuva, West Siberia, Xinjiang, …	Man. Brit. Bot.: 194 (1843)	0	L.	0	Linné, Carl von;Linnaeus, Carl
Physochlaina physaloides	Hyoscyamus physaloides	1753	1838	(L.) G.Don	Altay, Amur, Buryatiya, China North-Central, Chita, Inner Mongolia, Irkutsk, Kazakhstan, Krasnoyarsk, Manchuria, Mongolia, Tuva, West Siberia, Xinjiang	Gen. Hist. 4: 470 (1838)	0	L.	0	Linné, Carl von;Linnaeus, Carl
Picris hieracioides		1753	1753	L.	Albania, Altay, Austria, Baltic States, Bangladesh, Belarus, Bulgaria, Central European Rus, China North-Central, China South-Central, China Southeast, Corse, Czechoslovakia, East European Russia, France, Germany, Great Britain, Greece, Hungary, Ireland, Italy, Kazakhstan, Kirgizstan, Krym, Lebanon-Syria, Manchuria, Mongolia, Myanmar, North Caucasus, North European Russi, Northwest European R, Pa…	Sp. Pl.: 792 (1753)	0	L.	0	Linné, Carl von;Linnaeus, Carl
Pinguicula alpina		1753	1753	L.	Austria, Baltic States, Buryatiya, China North-Central, China South-Central, Czechoslovakia, Finland, France, Germany, Hungary, Irkutsk, Italy, Krasnoyarsk, Mongolia, Myanmar, Nepal, North European Russi, Norway, Poland, Qinghai, Romania, Spain, Sweden, Switzerland, Tibet, Tuva, Ukraine, West Himalaya, West Siberia, Yakutskiya, Yugoslavia; Extinct in: Great Britain	Sp. Pl.: 17 (1753)	0	L.	0	Linné, Carl von;Linnaeus, Carl
Pinguicula villosa		1753	1753	L.	Alaska, Alberta, Aleutian Is., Amur, British Columbia, Buryatiya, Chita, Finland, Inner Mongolia, Irkutsk, Kamchatka, Khabarovsk, Korea, Krasnoyarsk, Kuril Is., Labrador, Magadan, Manitoba, North European Russi, Northwest Territorie, Norway, Nunavut, Ontario, Québec, Sakhalin, Saskatchewan, Sweden, Tuva, West Siberia, Yakutskiya, Yukon	Sp. Pl.: 17 (1753)	0	L.	0	Linné, Carl von;Linnaeus, Carl
Pinus sylvestris		1753	1753	L.	Albania, Altay, Amur, Austria, Baltic States, Belarus, Belgium, Bulgaria, Buryatiya, Central European Rus, Chita, Czechoslovakia, East European Russia, Finland, France, Germany, Great Britain, Greece, Hungary, Inner Mongolia, Irkutsk, Italy, Kazakhstan, Khabarovsk, Krasnoyarsk, Krym, Manchuria, Mongolia, New York, North Caucasus, North European Russi, Northwest European R, Norway, Poland, Romania…	Sp. Pl.: 1000 (1753)	0	L.	0	Linné, Carl von;Linnaeus, Carl
Piper longum		1753	1753	L.	Assam, Bangladesh, China South-Central, East Himalaya, Laos, Nicobar Is., Vietnam	Sp. Pl.: 29 (1753)	0	L.	0	Linné, Carl von;Linnaeus, Carl
Pisonia aculeata		1753	1753	L.	Aldabra, Andaman Is., Argentina Northeast, Argentina Northwest, Bahamas, Belize, Bolivia, Borneo, Brazil North, Brazil Northeast, Brazil South, Brazil Southeast, Brazil West-Central, Cambodia, Cayman Is., Colombia, Costa Rica, Cuba, Dominican Republic, Ecuador, El Salvador, Ethiopia, Fiji, Florida, Guatemala, Hainan, Haiti, Honduras, India, Jamaica, Jawa, Kenya, KwaZulu-Natal, Laos, Leeward Is., …	Sp. Pl.: 1026 (1753)	0	L.	0	Linné, Carl von;Linnaeus, Carl
Pistia stratiotes		1753	1753	L.	Afghanistan, Andaman Is., Angola, Argentina Northeast, Assam, Bangladesh, Belize, Benin, Bolivia, Borneo, Botswana, Brazil North, Brazil Northeast, Brazil South, Brazil Southeast, Brazil West-Central, Burkina, Burundi, Cabinda, Cambodia, Cameroon, Cape Provinces, Caprivi Strip, Central African Repu, Chad, China South-Central, China Southeast, Colombia, Comoros, Congo, Costa Rica, Cuba, Dominican …	Sp. Pl.: 963 (1753)	0	L.	0	Linné, Carl von;Linnaeus, Carl
Plantago asiatica		1753	1753	L.	Amur, Cambodia, China North-Central, China South-Central, China Southeast, India, Inner Mongolia, Japan, Jawa, Kamchatka, Khabarovsk, Korea, Kuril Is., Laos, Lesser Sunda Is., Malaya, Manchuria, Myanmar, Nansei-shoto, Ogasawara-shoto, Primorye, Qinghai, Sakhalin, Taiwan, Thailand, Tibet, Vietnam, Xinjiang	Sp. Pl.: 113 (1753)	0	L.	0	Linné, Carl von;Linnaeus, Carl
Plantago lanceolata		1753	1753	L.	Afghanistan, Albania, Algeria, Austria, Azores, Baleares, Baltic States, Belarus, Belgium, Bulgaria, Canary Is., Central European Rus, China North-Central, China South-Central, China Southeast, Corse, Cyprus, Czechoslovakia, Denmark, East Aegean Is., East European Russia, East Himalaya, Finland, France, Føroyar, Germany, Great Britain, Greece, Hungary, Iceland, Iran, Iraq, Ireland, Italy, Kazakhs…	Sp. Pl.: 113 (1753)	0	L.	0	Linné, Carl von;Linnaeus, Carl
Plantago major		1753	1753	L.	Afghanistan, Albania, Algeria, Altay, Amur, Austria, Baleares, Baltic States, Belarus, Belgium, Bulgaria, Buryatiya, Canary Is., Cape Provinces, Cape Verde, Central European Rus, China North-Central, China South-Central, China Southeast, Chita, Corse, Cyprus, Czechoslovakia, Denmark, East Aegean Is., East European Russia, Egypt, Finland, France, Free State, Føroyar, Germany, Great Britain, Greece…	Sp. Pl.: 112 (1753)	0	L.	0	Linné, Carl von;Linnaeus, Carl
Platanthera fuscescens	Orchis fuscescens	1753	1899	(L.) Kraenzl.	Altay, Amur, Buryatiya, China North-Central, China South-Central, Chita, Inner Mongolia, Irkutsk, Japan, Khabarovsk, Korea, Krasnoyarsk, Kuril Is., Manchuria, Mongolia, Primorye, Qinghai, Sakhalin, West Siberia, Yakutskiya	Orchid. Gen. Sp. 1: 637 (1899)	0	L.	0	Linné, Carl von;Linnaeus, Carl
Platycladus orientalis	Thuja orientalis	1753	1949	(L.) Franco	Amur, China North-Central, China Southeast, Khabarovsk, Korea	Portugaliae Acta Biol., Sér. B, Sist., Julio Henriques: 33 (1949)	0	L.	0	Linné, Carl von;Linnaeus, Carl
Pleurolobus gangeticus	Hedysarum gangeticum	1753	2018	(L.) J.St.-Hil. ex H.Ohashi & K.Ohashi	Andaman Is., Angola, Assam, Bangladesh, Benin, Bismarck Archipelago, Borneo, Burkina, Cambodia, Cameroon, Caroline Is., Central African Repu, Chad, China South-Central, China Southeast, Congo, East Himalaya, Equatorial Guinea, Eritrea, Ethiopia, Gabon, Gambia, Ghana, Guinea, Guinea-Bissau, Gulf of Guinea Is., Hainan, India, Ivory Coast, Jawa, Kenya, KwaZulu-Natal, Laccadive Is., Laos, Lesser Sund…	J. Jap. Bot. 93: 184 (2018)	0	L.	0	Linné, Carl von;Linnaeus, Carl
Pluchea indica	Baccharis indica	1753	1831	(L.) Less.	Andaman Is., Bangladesh, Cambodia, China Southeast, Christmas I., Hainan, Jawa, Kazan-retto, Laos, Malaya, Myanmar, Nicobar Is., Northern Territory, Philippines, Queensland, South China Sea, Taiwan, Thailand, Vietnam	Linnaea 6: 150 (1831)	0	L.	0	Linné, Carl von;Linnaeus, Carl
Plumbago zeylanica		1753	1753	L.	Andaman Is., Angola, Argentina Northeast, Argentina Northwest, Arizona, Aruba, Bahamas, Bangladesh, Benin, Bolivia, Botswana, Brazil North, Brazil Northeast, Brazil South, Brazil Southeast, Brazil West-Central, Burkina, Burundi, Cameroon, Cape Provinces, Central African Repu, Chad, China South-Central, China Southeast, Christmas I., Colombia, Congo, Costa Rica, Cuba, Djibouti, Dominican Republic,…	Sp. Pl.: 151 (1753)	0	L.	0	Linné, Carl von;Linnaeus, Carl
Poa alpina		1753	1753	L.	Afghanistan, Alaska, Albania, Alberta, Altay, Austria, Baltic States, British Columbia, Bulgaria, Buryatiya, Colorado, Corse, Czechoslovakia, East European Russia, Finland, France, Føroyar, Germany, Great Britain, Greece, Greenland, Iceland, Idaho, Iran, Ireland, Italy, Kazakhstan, Kirgizstan, Krasnoyarsk, Labrador, Magadan, Manitoba, Mexico Gulf, Michigan, Mongolia, Montana, Morocco, Nepal, Neva…	Sp. Pl.: 67 (1753)	0	L.	0	Linné, Carl von;Linnaeus, Carl
Poa angustifolia		1753	1753	L.	Afghanistan, Altay, Amur, Austria, Azores, Baleares, Baltic States, Belarus, Belgium, Bulgaria, Buryatiya, Central European Rus, China North-Central, China South-Central, Chita, Corse, Cyprus, Czechoslovakia, Denmark, East European Russia, East Himalaya, Finland, France, Germany, Great Britain, Greece, Hungary, Inner Mongolia, Iran, Iraq, Irkutsk, Italy, Kazakhstan, Khabarovsk, Kirgizstan, Korea,…	Sp. Pl.: 67 (1753)	0	L.	0	Linné, Carl von;Linnaeus, Carl
Poa annua		1753	1753	L.	Afghanistan, Albania, Algeria, Altay, Amur, Assam, Austria, Azores, Baleares, Baltic States, Belarus, Belgium, Bulgaria, Burundi, Cameroon, Canary Is., Central European Rus, China North-Central, China South-Central, China Southeast, Corse, Cyprus, Czechoslovakia, Denmark, East Aegean Is., East European Russia, East Himalaya, Egypt, Eritrea, Ethiopia, Finland, France, Føroyar, Germany, Great Brita…	Sp. Pl.: 68 (1753)	0	L.	0	Linné, Carl von;Linnaeus, Carl
Poa bulbosa		1753	1753	L.	Afghanistan, Albania, Algeria, Altay, Austria, Baleares, Baltic States, Belgium, Bulgaria, Canary Is., Cape Provinces, Central European Rus, Corse, Cyprus, Czechoslovakia, Denmark, East Aegean Is., East European Russia, Finland, France, Germany, Great Britain, Greece, Hungary, Iran, Iraq, Italy, Kazakhstan, Kirgizstan, Kriti, Krym, Lebanon-Syria, Libya, Madeira, Morocco, Nepal, Netherlands, North…	Sp. Pl.: 70 (1753)	0	L.	0	Linné, Carl von;Linnaeus, Carl
Poa compressa		1753	1753	L.	Albania, Algeria, Austria, Baltic States, Belarus, Belgium, Bulgaria, Central European Rus, China North-Central, China South-Central, China Southeast, Corse, Cyprus, Czechoslovakia, Denmark, East European Russia, Finland, France, Germany, Greece, Hungary, Iran, Italy, Kazakhstan, Krym, Lebanon-Syria, Morocco, Netherlands, North Caucasus, North European Russi, Northwest European R, Norway, Poland,…	Sp. Pl.: 69 (1753)	0	L.	0	Linné, Carl von;Linnaeus, Carl
Poa nemoralis		1753	1753	L.	Afghanistan, Alaska, Albania, Alberta, Aleutian Is., Algeria, Altay, Amur, Arizona, Austria, Baltic States, Belarus, Belgium, British Columbia, Bulgaria, Buryatiya, California, Central European Rus, China North-Central, China South-Central, Colorado, Connecticut, Corse, Czechoslovakia, Delaware, Denmark, East European Russia, East Himalaya, Finland, France, Føroyar, Germany, Great Britain, Greece…	Sp. Pl.: 69 (1753)	0	L.	0	Linné, Carl von;Linnaeus, Carl
Poa pratensis		1753	1753	L.	Afghanistan, Alabama, Alaska, Albania, Alberta, Altay, Amur, Arizona, Arkansas, Austria, Baltic States, Belarus, Belgium, British Columbia, Bulgaria, Buryatiya, California, Central European Rus, China North-Central, China South-Central, China Southeast, Chita, Colorado, Connecticut, Corse, Cyprus, Czechoslovakia, Delaware, Denmark, District of Columbia, East Aegean Is., East European Russia, East…	Sp. Pl.: 67 (1753)	0	L.	0	Linné, Carl von;Linnaeus, Carl
Poa trivialis		1753	1753	L.	Afghanistan, Albania, Algeria, Altay, Austria, Azores, Baleares, Baltic States, Belarus, Belgium, Bulgaria, Buryatiya, Canary Is., Central European Rus, China North-Central, China South-Central, China Southeast, Corse, Cyprus, Czechoslovakia, Denmark, East Aegean Is., East European Russia, East Himalaya, Finland, France, Føroyar, Germany, Great Britain, Greece, Hungary, Iceland, Inner Mongolia, I…	Sp. Pl.: 67 (1753)	0	L.	0	Linné, Carl von;Linnaeus, Carl
Polycarpaea corymbosa	Achyranthes corymbosa	1753	1797	(L.) Lam.	Angola, Argentina Northeast, Bangladesh, Benin, Bolivia, Botswana, Brazil North, Brazil Northeast, Brazil South, Brazil Southeast, Brazil West-Central, Burkina, Burundi, Cameroon, Caprivi Strip, Central African Repu, Chad, China South-Central, China Southeast, Congo, Eritrea, Ethiopia, Gambia, Guinea, Guinea-Bissau, Guyana, Hainan, India, Ivory Coast, Kenya, KwaZulu-Natal, Laos, Malawi, Mali, Mau…	Tabl. Encycl. 2: 129 (1797)	0	L.	0	Linné, Carl von;Linnaeus, Carl
Polycnemum arvense		1753	1753	L.	Albania, Altay, Austria, Baltic States, Belarus, Belgium, Bulgaria, Central European Rus, Corse, Cyprus, Czechoslovakia, France, Germany, Greece, Hungary, Italy, Kazakhstan, Kirgizstan, Poland, Portugal, Romania, South European Russi, Spain, Switzerland, Tadzhikistan, Turkey, Turkey-in-Europe, Turkmenistan, Ukraine, Uzbekistan, Xinjiang, Yugoslavia	Sp. Pl.: 35 (1753)	0	L.	0	Linné, Carl von;Linnaeus, Carl
Polygala chinensis		1753	1753	L.	Assam, Bangladesh, Borneo, Cambodia, Caroline Is., China South-Central, China Southeast, East Himalaya, Hainan, India, Jawa, Laos, Lesser Sunda Is., Malaya, Myanmar, Nansei-shoto, New Guinea, Nicobar Is., Northern Territory, Pakistan, Philippines, Queensland, Solomon Is., Sri Lanka, Sumatera, Taiwan, Thailand, Vietnam, West Himalaya	Sp. Pl.: 704 (1753)	0	L.	0	Linné, Carl von;Linnaeus, Carl
Polygala sibirica		1753	1753	L.	Afghanistan, Altay, Amur, Bangladesh, Bulgaria, Buryatiya, Central European Rus, China North-Central, China South-Central, Chita, East European Russia, East Himalaya, Inner Mongolia, Irkutsk, Japan, Kazakhstan, Khabarovsk, Korea, Krasnoyarsk, Manchuria, Mongolia, Myanmar, Nepal, North Caucasus, Pakistan, Primorye, Qinghai, Romania, South European Russi, Tibet, Transcaucasus, Tuva, Ukraine, Vietna…	Sp. Pl.: 702 (1753)	0	L.	0	Linné, Carl von;Linnaeus, Carl
Polygonatum verticillatum	Convallaria verticillata	1753	1785	(L.) All.	Afghanistan, Albania, Assam, Austria, Baltic States, Belgium, Bulgaria, China North-Central, China South-Central, Czechoslovakia, Denmark, East Himalaya, France, Germany, Great Britain, Hungary, Inner Mongolia, Italy, Nepal, Netherlands, North Caucasus, Norway, Pakistan, Poland, Qinghai, Romania, Spain, Sweden, Switzerland, Tibet, Transcaucasus, Turkey, West Himalaya, Yugoslavia	Fl. Pedem. 1: 131 (1785)	0	L.	0	Linné, Carl von;Linnaeus, Carl
Polygonum aviculare		1753	1753	L.	Afghanistan, Albania, Algeria, Altay, Amur, Austria, Azores, Baleares, Baltic States, Belarus, Belgium, Bulgaria, Buryatiya, Canary Is., Central European Rus, China North-Central, China South-Central, China Southeast, Chita, Corse, Cyprus, Czechoslovakia, Denmark, East Aegean Is., East European Russia, East Himalaya, Egypt, Eritrea, Ethiopia, Finland, France, Føroyar, Germany, Great Britain, Gree…	Sp. Pl.: 362 (1753)	0	L.	0	Linné, Carl von;Linnaeus, Carl
Polypodium vulgare		1753	1753	L.	Albania, Altay, Austria, Baltic States, Belarus, Belgium, Bulgaria, Buryatiya, Cape Provinces, Central European Rus, Corse, Cyprus, Czechoslovakia, Denmark, East European Russia, Finland, France, Free State, Føroyar, Germany, Great Britain, Greece, Hungary, Iceland, Iran, Ireland, Italy, Kazakhstan, Korea, Krasnoyarsk, Krym, Kuril Is., KwaZulu-Natal, Lesotho, Morocco, Netherlands, North European …	Sp. Pl.: 1085 (1753)	0	L.	0	Linné, Carl von;Linnaeus, Carl
Polypogon monspeliensis	Alopecurus monspeliensis	1753	1798	(L.) Desf.	Afghanistan, Albania, Algeria, Azores, Baleares, Bulgaria, Canary Is., Chad, China North-Central, China South-Central, China Southeast, Corse, Cyprus, East Aegean Is., East Himalaya, Egypt, Eritrea, Ethiopia, France, Great Britain, Greece, Gulf States, India, Inner Mongolia, Iran, Iraq, Italy, Japan, Kazakhstan, Kenya, Kirgizstan, Korea, Kriti, Kuwait, Lebanon-Syria, Libya, Madeira, Mauritania, M…	Fl. Atlant. 1: 66 (1798)	0	L.	0	Linné, Carl von;Linnaeus, Carl
Polystichum aculeatum	Polypodium aculeatum	1753	1799	(L.) Roth	Albania, Algeria, Altay, Austria, Baltic States, Belgium, Bulgaria, Canary Is., Corse, Czechoslovakia, Denmark, France, Germany, Great Britain, Greece, Hungary, Iran, Ireland, Italy, Krym, Lebanon-Syria, Madeira, Morocco, Netherlands, North Caucasus, Northwest European R, Norway, Poland, Romania, Spain, Sweden, Switzerland, Transcaucasus, Turkey, Ukraine, Xinjiang, Yugoslavia	Tent. Fl. Germ. 3(1.1): 79 (1799)	0	L.	0	Linné, Carl von;Linnaeus, Carl
Polystichum lonchitis	Polypodium lonchitis	1753	1799	(L.) Roth	Afghanistan, Alaska, Albania, Alberta, Altay, Arizona, Austria, Baltic States, Belgium, British Columbia, Bulgaria, Buryatiya, California, Colorado, Corse, Czechoslovakia, East European Russia, Finland, France, Føroyar, Germany, Great Britain, Greece, Greenland, Hungary, Iceland, Idaho, Iran, Ireland, Irkutsk, Italy, Japan, Kamchatka, Kazakhstan, Krasnoyarsk, Kriti, Krym, Kuril Is., Michigan, Min…	Tent. Fl. Germ. 3(1): 71 (1799)	0	L.	0	Linné, Carl von;Linnaeus, Carl
Ponerorchis cucullata	Orchis cucullata	1753	2014	(L.) X.H.Jin, Schuit. & W.T.Jin	Altay, Amur, Baltic States, Belarus, Buryatiya, Central European Rus, China North-Central, China South-Central, China Southeast, Chita, East European Russia, East Himalaya, Inner Mongolia, Irkutsk, Japan, Khabarovsk, Korea, Krasnoyarsk, Kuril Is., Manchuria, Mongolia, Nepal, Poland, Primorye, Qinghai, Sakhalin, Tibet, Tuva, Ukraine, West Himalaya, West Siberia	Molec. Phylogen. Evol. 77: 51 (2014)	0	L.	0	Linné, Carl von;Linnaeus, Carl
Pongamia pinnata	Cytisus pinnatus	1753	1898	(L.) Pierre	Andaman Is., Assam, Bangladesh, Bismarck Archipelago, Borneo, China Southeast, Christmas I., East Himalaya, Fiji, Hainan, India, Japan, Jawa, Lesser Sunda Is., Malaya, Myanmar, Nansei-shoto, New Caledonia, New Guinea, Nicobar Is., Northern Territory, Pakistan, Philippines, Queensland, Samoa, Sri Lanka, Sumatera, Taiwan, Thailand, Vanuatu, Vietnam, Wallis-Futuna Is., West Himalaya	Fl. Forest. Cochinch. 4: t. 385 (1898)	0	L.	0	Linné, Carl von;Linnaeus, Carl
Pontederia hastata		1753	1753	L.	Assam, Bangladesh, Borneo, Cambodia, China South-Central, China Southeast, East Himalaya, Hainan, India, Jawa, Laos, Malaya, Myanmar, Nepal, New Guinea, Northern Territory, Philippines, Sri Lanka, Sulawesi, Sumatera, Thailand, Vietnam	Sp. Pl.: 288 (1753)	0	L.	0	Linné, Carl von;Linnaeus, Carl
Populus alba		1753	1753	L.	Albania, Algeria, Altay, Austria, Bulgaria, Central European Rus, Corse, Czechoslovakia, East Aegean Is., East European Russia, France, Germany, Greece, Hungary, Italy, Kazakhstan, Kriti, Lebanon-Syria, Libya, Morocco, Poland, Portugal, Romania, Sardegna, Sicilia, South European Russi, Spain, Switzerland, Tunisia, Turkey, Turkmenistan, Ukraine, Xinjiang, Yugoslavia	Sp. Pl.: 1034 (1753)	0	L.	0	Linné, Carl von;Linnaeus, Carl
Populus tremula		1753	1753	L.	Albania, Algeria, Altay, Austria, Baltic States, Belarus, Belgium, Bulgaria, Central European Rus, China North-Central, China South-Central, China Southeast, Corse, Czechoslovakia, Denmark, East Aegean Is., East European Russia, East Himalaya, Finland, France, Germany, Great Britain, Greece, Hungary, Inner Mongolia, Ireland, Italy, Japan, Kamchatka, Kazakhstan, Korea, Kuril Is., Lebanon-Syria, Ma…	Sp. Pl.: 1034 (1753)	0	L.	0	Linné, Carl von;Linnaeus, Carl
Potentilla acaulis		1753	1753	L.	Altay, Buryatiya, China North-Central, Chita, Inner Mongolia, Irkutsk, Kazakhstan, Krasnoyarsk, Manchuria, Mongolia, Qinghai, Tuva, West Siberia, Xinjiang, Yakutskiya; Doubtfully present in: Amur	Sp. Pl.: 500 (1753)	0	L.	0	Linné, Carl von;Linnaeus, Carl
Potentilla argentea		1753	1753	L.	Afghanistan, Albania, Altay, Amur, Austria, Baltic States, Belarus, Belgium, Bulgaria, Buryatiya, Central European Rus, Corse, Czechoslovakia, Denmark, East European Russia, Finland, France, Germany, Great Britain, Greece, Hungary, Iran, Irkutsk, Italy, Kamchatka, Kazakhstan, Khabarovsk, Krasnoyarsk, Kriti, Krym, Magadan, Netherlands, North Caucasus, North European Russi, Northwest European R, No…	Sp. Pl.: 497 (1753)	0	L.	0	Linné, Carl von;Linnaeus, Carl
Potentilla fragarioides		1753	1753	L.	Altay, Amur, Buryatiya, China North-Central, China South-Central, China Southeast, Chita, East Himalaya, India, Inner Mongolia, Irkutsk, Japan, Kazakhstan, Khabarovsk, Korea, Krasnoyarsk, Kuril Is., Manchuria, Mongolia, Sakhalin, West Siberia, Yakutskiya	Sp. Pl.: 496 (1753)	0	L.	0	Linné, Carl von;Linnaeus, Carl
Potentilla multifida		1753	1753	L.	Afghanistan, Albania, Altay, Amur, Buryatiya, China North-Central, China South-Central, East European Russia, France, Iran, Irkutsk, Italy, Kamchatka, Kazakhstan, Korea, Krasnoyarsk, Magadan, Manchuria, Mongolia, Nepal, Pakistan, Primorye, Qinghai, Switzerland, Tadzhikistan, Tibet, Turkmenistan, Tuva, Uzbekistan, West Siberia, Yakutskiya	Sp. Pl.: 496 (1753)	0	L.	0	Linné, Carl von;Linnaeus, Carl
Potentilla nivea		1753	1753	L.	Alaska, Alberta, Altay, Arizona, Austria, British Columbia, Buryatiya, China North-Central, Chita, Colorado, East European Russia, Finland, France, Greenland, Inner Mongolia, Irkutsk, Italy, Japan, Kamchatka, Kazakhstan, Khabarovsk, Kirgizstan, Korea, Krasnoyarsk, Labrador, Magadan, Manchuria, Manitoba, Mongolia, Montana, New Mexico, Newfoundland, North European Russi, Northwest Territorie, Norwa…	Sp. Pl.: 499 (1753)	0	L.	0	Linné, Carl von;Linnaeus, Carl
Potentilla recta		1753	1753	L.	Albania, Algeria, Altay, Bulgaria, Central European Rus, Corse, Cyprus, France, Greece, Hungary, Iran, Iraq, Italy, Kazakhstan, Krym, Morocco, Romania, Sardegna, Sicilia, South European Russi, Spain, Transcaucasus, Turkey, Ukraine, Xinjiang	Sp. Pl.: 497 (1753)	0	L.	0	Linné, Carl von;Linnaeus, Carl
Potentilla reptans		1753	1753	L.	Afghanistan, Albania, Algeria, Austria, Azores, Baleares, Baltic States, Belgium, Bulgaria, Canary Is., Central European Rus, China North-Central, China South-Central, Colorado, Corse, Cyprus, Czechoslovakia, Denmark, East European Russia, Eritrea, Ethiopia, Finland, France, Germany, Great Britain, Greece, Hungary, Iran, Iraq, Ireland, Italy, Kazakhstan, Kirgizstan, Kriti, Krym, Lebanon-Syria, Li…	Sp. Pl.: 499 (1753)	0	L.	0	Linné, Carl von;Linnaeus, Carl
Potentilla sericea		1753	1753	L.	Afghanistan, Altay, Buryatiya, Central European Rus, China North-Central, Chita, East European Russia, Inner Mongolia, Irkutsk, Kazakhstan, Kirgizstan, Krasnoyarsk, Manchuria, Mongolia, North Caucasus, Pakistan, Qinghai, Tibet, Tuva, West Siberia, Xinjiang	Sp. Pl.: 495 (1753)	0	L.	0	Linné, Carl von;Linnaeus, Carl
Potentilla supina		1753	1753	L.	Afghanistan, Albania, Altay, Amur, Austria, Belgium, Bulgaria, Cape Provinces, Central European Rus, China North-Central, China South-Central, China Southeast, Czechoslovakia, East Himalaya, Egypt, France, Free State, Germany, Greece, Hungary, India, Inner Mongolia, Iran, Iraq, Italy, Japan, Kazakhstan, Khabarovsk, Kirgizstan, Krym, KwaZulu-Natal, Lebanon-Syria, Magadan, Manchuria, Mongolia, Moro…	Sp. Pl.: 497 (1753)	0	L.	0	Linné, Carl von;Linnaeus, Carl
Pothos scandens		1753	1753	L.	Andaman Is., Assam, Bangladesh, Borneo, Cambodia, China South-Central, Comoros, East Himalaya, India, Jawa, Laos, Lesser Sunda Is., Madagascar, Malaya, Maluku, Myanmar, New Guinea, Nicobar Is., Philippines, Seychelles, Sri Lanka, Sulawesi, Sumatera, Thailand, Tibet, Vietnam; Doubtfully present in: Nepal, Réunion	Sp. Pl.: 968 (1753)	0	L.	0	Linné, Carl von;Linnaeus, Carl
Pouzolzia zeylanica		1753	1838	(L.) Benn.	Andaman Is., Assam, Bangladesh, Borneo, Cambodia, China North-Central, China South-Central, China Southeast, East Himalaya, India, Laccadive Is., Laos, Malaya, Maldives, Myanmar, Nepal, New Guinea, Nicobar Is., Northern Territory, Pakistan, Philippines, Queensland, Socotra, Solomon Is., Sri Lanka, Thailand, Vietnam, West Himalaya, Western Australia	Pl. Jav. Rar.: 67 (1838)	0	L.	0	Linné, Carl von;Linnaeus, Carl
Prunella vulgaris		1753	1753	L.	Afghanistan, Alabama, Alaska, Albania, Alberta, Aleutian Is., Algeria, Altay, Amur, Arizona, Arkansas, Assam, Austria, Azores, Baleares, Baltic States, Belarus, Belgium, British Columbia, Bulgaria, Buryatiya, California, Canary Is., Cape Verde, Central European Rus, China North-Central, China South-Central, China Southeast, Colorado, Connecticut, Corse, Costa Rica, Cyprus, Czechoslovakia, Delawar…	Sp. Pl.: 600 (1753)	0	L.	0	Linné, Carl von;Linnaeus, Carl
Prunus armeniaca		1753	1753	L.	China North-Central, China South-Central, East Himalaya, Inner Mongolia, Kazakhstan, Kirgizstan, Kriti, Manchuria, Qinghai, Uzbekistan, Xinjiang	Sp. Pl.: 474 (1753)	0	L.	0	Linné, Carl von;Linnaeus, Carl
Prunus padus		1753	1753	L.	Albania, Altay, Amur, Austria, Baltic States, Belarus, Belgium, Bulgaria, Buryatiya, Central European Rus, China North-Central, China Southeast, Czechoslovakia, Denmark, Finland, France, Germany, Great Britain, Hungary, Inner Mongolia, Ireland, Irkutsk, Italy, Japan, Kamchatka, Kazakhstan, Khabarovsk, Kirgizstan, Korea, Krasnoyarsk, Krym, Magadan, Manchuria, Mongolia, Morocco, Netherlands, North …	Sp. Pl.: 473 (1753)	0	L.	0	Linné, Carl von;Linnaeus, Carl
Prunus persica	Amygdalus persica	1753	1801	(L.) Batsch	China North-Central	Beytr. Entw. Gewächsreich: 30 (1801)	1	L.	0	Linné, Carl von;Linnaeus, Carl
Prunus sibirica		1753	1753	L.	Buryatiya, China North-Central, Inner Mongolia, Korea, Manchuria, Mongolia, Primorye	Sp. Pl.: 474 (1753)	0	L.	0	Linné, Carl von;Linnaeus, Carl
Psephellus sibiricus	Centaurea sibirica	1753	2000	(L.) Wagenitz	Altay, East European Russia, Kazakhstan, West Siberia, Xinjiang	Willdenowia 30(1): 38 (2000)	0	L.	0	Linné, Carl von;Linnaeus, Carl
Pseudocherleria laricina	Spergula laricina	1753	2014	(L.) Dillenb. & Kadereit	Amur, Chita, Inner Mongolia, Khabarovsk, Korea, Manchuria, Mongolia, Primorye, Sakhalin, Yakutskiya	Taxon 63: 451 (2014)	0	L.	0	Linné, Carl von;Linnaeus, Carl
Psilotum nudum	Lycopodium nudum	1753	1805	(L.) P.Beauv.	Alabama, Andaman Is., Angola, Argentina Northeast, Argentina Northwest, Arizona, Arkansas, Assam, Bahamas, Bangladesh, Belize, Bermuda, Bolivia, Brazil North, Brazil Northeast, Brazil South, Brazil Southeast, Brazil West-Central, Cape Provinces, Cape Verde, Caroline Is., Cayman Is., Central American Pac, Chagos Archipelago, China North-Central, China South-Central, China Southeast, Christmas I., …	Prodr. Aethéogam.: 112 (1805)	0	L.	0	Linné, Carl von;Linnaeus, Carl
Pteris semipinnata		1753	1753	L.	Assam, Bangladesh, Borneo, China South-Central, China Southeast, East Himalaya, India, Japan, Korea, Laos, Maluku, Myanmar, Nansei-shoto, Nepal, Philippines, Sri Lanka, Sulawesi, Sumatera, Taiwan, Thailand, Vietnam	Sp. Pl.: 1076 (1753)	0	L.	0	Linné, Carl von;Linnaeus, Carl
Pteris vittata		1753	1753	L.	Algeria, Andaman Is., Angola, Assam, Azores, Baleares, Bangladesh, Bismarck Archipelago, Borneo, Botswana, Burundi, Cambodia, Cameroon, Canary Is., Cape Provinces, Cape Verde, China North-Central, China South-Central, China Southeast, Christmas I., Comoros, Cyprus, Djibouti, East Himalaya, Ethiopia, Fiji, France, Free State, Ghana, Greece, Gulf of Guinea Is., India, Italy, Japan, Jawa, Kenya, Kri…	Sp. Pl.: 1074 (1753)	0	L.	0	Linné, Carl von;Linnaeus, Carl
Pterospermum acerifolium	Pentapetes acerifolia	1753	1800	(L.) Willd.	Bangladesh, China South-Central, East Himalaya, Laos, Malaya, Myanmar, Nepal, Thailand, Vietnam	Sp. Pl., ed. 4, 3: 729 (1800)	0	L.	0	Linné, Carl von;Linnaeus, Carl
Pugionium cornutum	Bunias cornuta	1753	1791	(L.) Gaertn.	China North-Central, Inner Mongolia	Fruct. Sem. Pl. 2: 291 (1791)	1	L.	0	Linné, Carl von;Linnaeus, Carl
Pulsatilla patens	Anemone patens	1753	1768	(L.) Mill.	Baltic States, Belarus, Central European Rus, Czechoslovakia, East European Russia, Finland, Germany, Hungary, Kazakhstan, North European Russi, Northwest European R, Poland, Romania, South European Russi, Sweden, Ukraine, Xinjiang, Yakutskiya	Gard. Dict. ed. 8: n.º 4 (1768)	0	L.	0	Linné, Carl von;Linnaeus, Carl
Pyrola minor		1753	1753	L.	Alaska, Albania, Alberta, Aleutian Is., Altay, Amur, Arizona, Austria, Baltic States, Belarus, Belgium, British Columbia, Bulgaria, Buryatiya, California, Central European Rus, China South-Central, Chita, Colorado, Corse, Czechoslovakia, Denmark, East European Russia, Finland, France, Føroyar, Germany, Great Britain, Greece, Greenland, Hungary, Iceland, Idaho, Ireland, Irkutsk, Italy, Japan, Kamc…	Sp. Pl.: 396 (1753)	0	L.	0	Linné, Carl von;Linnaeus, Carl
Pyrola rotundifolia		1753	1753	L.	Afghanistan, Albania, Altay, Amur, Baltic States, Belarus, Belgium, Bulgaria, Buryatiya, Central European Rus, China North-Central, China South-Central, Chita, Czechoslovakia, Denmark, East European Russia, Finland, France, Germany, Great Britain, Greece, Hungary, Iran, Ireland, Irkutsk, Italy, Japan, Kamchatka, Kazakhstan, Khabarovsk, Kirgizstan, Krasnoyarsk, Krym, Kuril Is., Magadan, Mongolia, …	Sp. Pl.: 396 (1753)	0	L.	0	Linné, Carl von;Linnaeus, Carl
Pyrrosia lanceolata	Acrostichum lanceolatum	1753	1930	(Wall.) Farw.	Andaman Is., Bangladesh, Borneo, Cambodia, Cameroon, Caroline Is., Central African Repu, China South-Central, Christmas I., East Himalaya, Fiji, Gabon, Gulf of Guinea Is., India, Jawa, Laos, Lesser Sunda Is., Madagascar, Malaya, Maluku, Marianas, Mauritius, Mozambique, Myanmar, Nansei-shoto, Nepal, New Guinea, Nicobar Is., Philippines, Queensland, Rodrigues, Réunion, Samoa, Seychelles, Solomon Is…	Amer. Midl. Naturalist 12: 245 (1930)	0	Wall.	0	Wulff, Nathan;Wallich, Nathaniel;Wolff, Nathaniel
Ranunculus falcatus		1753	1753	L.	Afghanistan, Algeria, Bulgaria, Central European Rus, Cyprus, East European Russia, France, Greece, Iran, Iraq, Italy, Kazakhstan, Kirgizstan, Krym, Lebanon-Syria, North Caucasus, Pakistan, Palestine, South European Russi, Spain, Tadzhikistan, Transcaucasus, Tunisia, Turkey, Turkey-in-Europe, Turkmenistan, Uzbekistan, West Himalaya, Xinjiang, Yugoslavia; Extinct in: Austria	Sp. Pl.: 556 (1753)	0	L.	0	Linné, Carl von;Linnaeus, Carl
Ranunculus lingua		1753	1753	L.	Albania, Altay, Austria, Baltic States, Belarus, Belgium, Bulgaria, Buryatiya, Central European Rus, Czechoslovakia, Denmark, East European Russia, Finland, France, Germany, Great Britain, Greece, Hungary, Iran, Ireland, Italy, Kazakhstan, Kirgizstan, Krasnoyarsk, Netherlands, North European Russi, Northwest European R, Norway, Pakistan, Poland, Romania, Sicilia, South European Russi, Spain, Swed…	Sp. Pl.: 549 (1753)	0	L.	0	Linné, Carl von;Linnaeus, Carl
Ranunculus polyanthemos		1753	1753	L.	Albania, Altay, Austria, Baltic States, Belarus, Bulgaria, Buryatiya, Central European Rus, Chita, Czechoslovakia, East European Russia, Germany, Hungary, Iran, Irkutsk, Kazakhstan, Khabarovsk, Kirgizstan, Krasnoyarsk, Krym, Magadan, North European Russi, Northwest European R, Norway, Poland, Primorye, Romania, South European Russi, Turkey, Turkey-in-Europe, Turkmenistan, Tuva, Ukraine, Uzbekista…	Sp. Pl.: 554 (1753)	0	L.	0	Linné, Carl von;Linnaeus, Carl
Ranunculus repens		1753	1753	L.	Albania, Algeria, Altay, Amur, Austria, Baltic States, Belarus, Belgium, Bulgaria, Canary Is., Central European Rus, China North-Central, China South-Central, Chita, Corse, Czechoslovakia, Denmark, East European Russia, Finland, France, Føroyar, Germany, Great Britain, Greece, Hungary, Iceland, Inner Mongolia, Iran, Ireland, Irkutsk, Italy, Japan, Kamchatka, Kazakhstan, Khabarovsk, Kirgizstan, Ko…	Sp. Pl.: 554 (1753)	0	L.	0	Linné, Carl von;Linnaeus, Carl
Ranunculus reptans		1753	1753	L.	Alaska, Alberta, Aleutian Is., Altay, Amur, Austria, Baltic States, Belarus, British Columbia, Bulgaria, Buryatiya, Central European Rus, Chita, Connecticut, Denmark, East European Russia, Finland, France, Føroyar, Germany, Greenland, Iceland, Idaho, Inner Mongolia, Irkutsk, Italy, Kamchatka, Kazakhstan, Khabarovsk, Krasnoyarsk, Kuril Is., Labrador, Magadan, Maine, Manchuria, Masachusettes, Michi…	Sp. Pl.: 549 (1753)	0	L.	0	Linné, Carl von;Linnaeus, Carl
Ranunculus sceleratus		1753	1753	L.	Afghanistan, Alabama, Albania, Alberta, Algeria, Altay, Amur, Arkansas, Assam, Austria, Baleares, Baltic States, Bangladesh, Belarus, Belgium, Bulgaria, Buryatiya, Central European Rus, China North-Central, China South-Central, China Southeast, Chita, Colorado, Connecticut, Corse, Czechoslovakia, Delaware, Denmark, District of Columbia, East European Russia, East Himalaya, Egypt, Ethiopia, Finlan…	Sp. Pl.: 551 (1753)	0	L.	0	Linné, Carl von;Linnaeus, Carl
Rauvolfia serpentina	Ophioxylon serpentinum	1753	1877	(L.) Benth. ex Kurz	Andaman Is., Assam, Bangladesh, Cambodia, China South-Central, East Himalaya, India, Jawa, Laccadive Is., Laos, Lesser Sunda Is., Malaya, Myanmar, Nepal, Sri Lanka, Thailand, Vietnam	Forest Fl. Burma 2: 171 (1877)	0	L.	0	Linné, Carl von;Linnaeus, Carl
Rhamnus cathartica		1753	1753	L.	Albania, Algeria, Altay, Austria, Baltic States, Belarus, Belgium, Bulgaria, Central European Rus, Czechoslovakia, Denmark, East European Russia, Finland, France, Germany, Great Britain, Greece, Hungary, Iran, Ireland, Italy, Kazakhstan, Kirgizstan, Krym, Morocco, Netherlands, North European Russi, Norway, Poland, Portugal, Romania, Sicilia, South European Russi, Spain, Sweden, Switzerland, Tadzh…	Sp. Pl.: 193 (1753)	0	L.	0	Linné, Carl von;Linnaeus, Carl
Rhaphiolepis indica	Crataegus indica	1753	1820	(L.) Lindl.	Cambodia, China South-Central, China Southeast, Hainan, Japan, Korea, Laos, Nansei-shoto, Ogasawara-shoto, Taiwan, Thailand, Vietnam	Bot. Reg. 6: t. 468 (1820)	0	L.	0	Linné, Carl von;Linnaeus, Carl
Rheum rhabarbarum		1753	1753	L.	Buryatiya, China North-Central, China South-Central, Chita, Inner Mongolia, Irkutsk, Manchuria, Mongolia	Sp. Pl.: 372 (1753)	0	L.	0	Linné, Carl von;Linnaeus, Carl
Rhodiola rosea		1753	1753	L.	Alaska, Albania, Altay, Amur, Austria, Bulgaria, Buryatiya, China North-Central, Chita, Czechoslovakia, East European Russia, Finland, France, Føroyar, Germany, Great Britain, Greenland, Iceland, Ireland, Irkutsk, Italy, Japan, Kamchatka, Kazakhstan, Khabarovsk, Korea, Krasnoyarsk, Kuril Is., Labrador, Magadan, Maine, Manchuria, Mongolia, New Brunswick, New York, Newfoundland, North Carolina, Nor…	Sp. Pl.: 1035 (1753)	0	L.	0	Linné, Carl von;Linnaeus, Carl
Rhododendron dauricum		1753	1753	L.	Altay, Amur, Buryatiya, Chita, Inner Mongolia, Irkutsk, Japan, Khabarovsk, Korea, Krasnoyarsk, Manchuria, Mongolia, Primorye, Tuva, West Siberia, Yakutskiya	Sp. Pl.: 392 (1753)	0	L.	0	Linné, Carl von;Linnaeus, Carl
Rhododendron lapponicum	Azalea lapponica	1753	1812	(L.) Wahlenb.	Alaska, Alberta, Amur, British Columbia, Finland, Greenland, Inner Mongolia, Japan, Kamchatka, Khabarovsk, Korea, Magadan, Maine, Manchuria, Manitoba, Mongolia, New Hampshire, New York, Newfoundland, Northwest Territorie, Norway, Nova Scotia, Nunavut, Ontario, Primorye, Québec, Sakhalin, Sweden, Wisconsin, Yakutskiya, Yukon	Fl. Lapp.: 104 (1812)	0	L.	0	Linné, Carl von;Linnaeus, Carl
Rhynchosia minima	Dolichos minimus	1753	1825	(L.) DC.	Afghanistan, Algeria, Angola, Argentina Northeast, Argentina Northwest, Aruba, Assam, Bahamas, Bangladesh, Belize, Benin, Bolivia, Botswana, Brazil North, Brazil Northeast, Brazil South, Brazil Southeast, Brazil West-Central, Burkina, Burundi, Cameroon, Cape Provinces, Cape Verde, Cayman Is., Central African Repu, Chad, Chile North, China South-Central, Colombia, Costa Rica, Cuba, Dominican Repub…	Prodr. 2: 385 (1825)	0	L.	0	Linné, Carl von;Linnaeus, Carl
Rhynchospora alba	Schoenus albus	1753	1805	(L.) Vahl	Alabama, Alaska, Alberta, Amur, Austria, Baltic States, Belarus, Belgium, British Columbia, California, Central European Rus, Colorado, Connecticut, Czechoslovakia, Delaware, Denmark, East European Russia, Finland, France, Georgia, Germany, Great Britain, Greece, Idaho, Illinois, Indiana, Ireland, Irkutsk, Italy, Japan, Kamchatka, Kazakhstan, Korea, Kuril Is., Maine, Manchuria, Manitoba, Maryland…	Enum. Pl. Obs. 2: 236 (1805)	0	L.	0	Linné, Carl von;Linnaeus, Carl
Rhynchostylis retusa	Epidendrum retusum	1753	1825	(L.) Blume	Andaman Is., Assam, Bangladesh, Borneo, Cambodia, China South-Central, East Himalaya, India, Jawa, Laos, Malaya, Myanmar, Nepal, Nicobar Is., Philippines, Sri Lanka, Sumatera, Thailand, Vietnam, West Himalaya	Bijdr. Fl. Ned. Ind.: 286 (1825)	0	L.	0	Linné, Carl von;Linnaeus, Carl
Rorippa palustris	Sisymbrium amphibium var. palustre	1753	1821	(L.) Besser	Afghanistan, Alabama, Alaska, Albania, Alberta, Altay, Amur, Arizona, Arkansas, Austria, Baltic States, Bangladesh, Belarus, Belgium, British Columbia, Bulgaria, Buryatiya, California, Central European Rus, China North-Central, China South-Central, China Southeast, Chita, Colorado, Connecticut, Corse, Czechoslovakia, Delaware, Denmark, District of Columbia, East European Russia, East Himalaya, Eg…	Enum. Pl. Volh.: 27 (1821)	0	L.	0	Linné, Carl von;Linnaeus, Carl
Rorippa sylvestris	Sisymbrium sylvestre	1753	1821	(L.) Besser	Albania, Altay, Austria, Baltic States, Belarus, Belgium, Bulgaria, Central European Rus, Corse, Czechoslovakia, Denmark, East European Russia, France, Germany, Greece, Hungary, Iran, Ireland, Italy, Kazakhstan, Kirgizstan, Krasnoyarsk, Krym, Netherlands, North European Russi, Northwest European R, Poland, Portugal, Romania, Sardegna, Sicilia, South European Russi, Spain, Sweden, Switzerland, Tad…	Enum. Pl. Volh.: 27 (1821)	0	L.	0	Linné, Carl von;Linnaeus, Carl
Rosa indica		1753	1753	L.	China South-Central, China Southeast, Laos, Taiwan, Vietnam	Sp. Pl.: 492 (1753)	0	L.	0	Linné, Carl von;Linnaeus, Carl
Rosa spinosissima		1753	1753	L.	Albania, Algeria, Altay, Austria, Belarus, Belgium, Bulgaria, Central European Rus, Czechoslovakia, Denmark, East European Russia, France, Germany, Great Britain, Greece, Hungary, Iceland, Iran, Ireland, Italy, Kazakhstan, Krasnoyarsk, Krym, Mongolia, Netherlands, North Caucasus, North European Russi, Northwest European R, Norway, Romania, South European Russi, Spain, Switzerland, Transcaucasus, …	Sp. Pl.: 491 (1753)	0	L.	0	Linné, Carl von;Linnaeus, Carl
Rostellularia procumbens	Justicia procumbens	1753	1847	(L.) Nees	Andaman Is., Assam, Bangladesh, Cambodia, China North-Central, China South-Central, China Southeast, East Himalaya, Hainan, India, Jawa, Korea, Laccadive Is., Laos, Malaya, Maldives, Myanmar, Nansei-shoto, Nepal, Pakistan, Philippines, Sri Lanka, Taiwan, Thailand, Tibet, Vietnam, West Himalaya	A.P.de Candolle, Prodr. 11: 371 (1847)	0	L.	0	Linné, Carl von;Linnaeus, Carl
Rothia indica	Trigonella indica	1753	1913	(L.) Druce	China Southeast, Hainan, India, Laos, Malaya, Northern Territory, Queensland, South China Sea, Sri Lanka, Vietnam, West Himalaya, Western Australia	Rep. Bot. Exch. Club Soc. Brit. Isles 3: 423 (1913 publ. 1914)	0	L.	0	Linné, Carl von;Linnaeus, Carl
Rubia tinctorum		1753	1753	L.	Afghanistan, Albania, Cyprus, East Aegean Is., Greece, India, Iran, Iraq, Italy, Kazakhstan, Kirgizstan, Kriti, Krym, Lebanon-Syria, North Caucasus, Pakistan, Palestine, Sicilia, South European Russi, Tadzhikistan, Transcaucasus, Turkey, Turkey-in-Europe, Turkmenistan, Ukraine, Uzbekistan, Vietnam, West Himalaya, Xinjiang, Yugoslavia	Sp. Pl.: 109 (1753)	0	L.	0	Linné, Carl von;Linnaeus, Carl
Rubus arcticus		1753	1753	L.	Alaska, Alberta, Altay, Amur, British Columbia, Buryatiya, Central European Rus, Chita, East European Russia, Finland, Inner Mongolia, Irkutsk, Japan, Kamchatka, Khabarovsk, Korea, Krasnoyarsk, Magadan, Manchuria, Mongolia, North European Russi, Northwest European R, Northwest Territorie, Norway, Primorye, Sakhalin, Sweden, Tuva, Washington, West Siberia, Yakutskiya, Yukon; Extinct in: Baltic Sta…	Sp. Pl.: 494 (1753)	0	L.	0	Linné, Carl von;Linnaeus, Carl
Rubus caesius		1753	1753	L.	Afghanistan, Albania, Algeria, Altay, Austria, Baleares, Baltic States, Belarus, Belgium, Bulgaria, Central European Rus, Corse, Czechoslovakia, Denmark, East European Russia, Finland, France, Germany, Great Britain, Greece, Hungary, Iran, Iraq, Ireland, Italy, Kazakhstan, Kirgizstan, Krym, Lebanon-Syria, Netherlands, North Caucasus, North European Russi, Northwest European R, Norway, Poland, Por…	Sp. Pl.: 493 (1753)	0	L.	0	Linné, Carl von;Linnaeus, Carl
Rubus idaeus		1753	1753	L.	Albania, Altay, Austria, Baltic States, Belarus, Belgium, Bulgaria, Buryatiya, Central European Rus, China North-Central, Corse, Czechoslovakia, Denmark, East European Russia, Finland, France, Germany, Great Britain, Greece, Hungary, Ireland, Irkutsk, Italy, Japan, Kazakhstan, Kirgizstan, Korea, Krasnoyarsk, Krym, Manchuria, Netherlands, North Caucasus, North European Russi, Northwest European R,…	Sp. Pl.: 492 (1753)	0	L.	0	Linné, Carl von;Linnaeus, Carl
Rubus parvifolius		1753	1753	L.	China North-Central, China South-Central, China Southeast, Hainan, Japan, Korea, Kuril Is., Manchuria, Nansei-shoto, New South Wales, Queensland, Sakhalin, South Australia, Taiwan, Tasmania, Victoria, Vietnam	Sp. Pl.: 1197 (1753)	0	L.	0	Linné, Carl von;Linnaeus, Carl
Rubus saxatilis		1753	1753	L.	Albania, Altay, Amur, Austria, Baltic States, Belarus, Belgium, Bulgaria, Central European Rus, China North-Central, China Southeast, Chita, Czechoslovakia, Denmark, East European Russia, Finland, France, Føroyar, Germany, Great Britain, Greece, Greenland, Hungary, Iceland, Ireland, Irkutsk, Italy, Kazakhstan, Khabarovsk, Kirgizstan, Krasnoyarsk, Krym, Magadan, Manchuria, Mongolia, Netherlands, N…	Sp. Pl.: 494 (1753)	0	L.	0	Linné, Carl von;Linnaeus, Carl
Rumex acetosa		1753	1753	L.	Afghanistan, Albania, Altay, Amur, Austria, Baleares, Baltic States, Belarus, Belgium, Bulgaria, Buryatiya, Central European Rus, China North-Central, China South-Central, China Southeast, Chita, Corse, Czechoslovakia, Denmark, East European Russia, Finland, France, Føroyar, Germany, Great Britain, Hungary, Iceland, Inner Mongolia, Iran, Ireland, Irkutsk, Italy, Japan, Kazakhstan, Khabarovsk, Kir…	Sp. Pl.: 337 (1753)	0	L.	0	Linné, Carl von;Linnaeus, Carl
Rumex acetosella		1753	1753	L.	Albania, Altay, Amur, Austria, Baltic States, Belarus, Belgium, Bulgaria, Buryatiya, Central European Rus, China North-Central, China South-Central, Chita, Corse, Czechoslovakia, Denmark, East European Russia, Finland, France, Føroyar, Germany, Great Britain, Greece, Hungary, Iceland, Inner Mongolia, Iran, Ireland, Irkutsk, Italy, Japan, Kamchatka, Kazakhstan, Khabarovsk, Korea, Krasnoyarsk, Kuri…	Sp. Pl.: 338 (1753)	0	L.	0	Linné, Carl von;Linnaeus, Carl
Rumex aquaticus		1753	1753	L.	Altay, Austria, Baltic States, Belarus, Bulgaria, Buryatiya, Central European Rus, China North-Central, China South-Central, Czechoslovakia, Denmark, East European Russia, Finland, France, Germany, Great Britain, Greece, Hungary, Inner Mongolia, Irkutsk, Italy, Kazakhstan, Kirgizstan, Korea, Krasnoyarsk, Manchuria, Mongolia, Northwest European R, Norway, Poland, Qinghai, Romania, South European R…	Sp. Pl.: 336 (1753)	0	L.	0	Linné, Carl von;Linnaeus, Carl
Rumex crispus		1753	1753	L.	Albania, Algeria, Altay, Austria, Azores, Baleares, Baltic States, Belarus, Belgium, Bulgaria, Canary Is., Cape Verde, Central European Rus, China North-Central, China South-Central, China Southeast, Chita, Corse, Cyprus, Czechoslovakia, Denmark, East Aegean Is., East European Russia, Egypt, Finland, France, Føroyar, Germany, Great Britain, Greece, Hungary, Iceland, Inner Mongolia, Iran, Iraq, Ir…	Sp. Pl.: 335 (1753)	0	L.	0	Linné, Carl von;Linnaeus, Carl
Rumex maritimus		1753	1753	L.	Albania, Altay, Amur, Assam, Austria, Baltic States, Bangladesh, Belarus, Belgium, Buryatiya, Central European Rus, China North-Central, China Southeast, Chita, Czechoslovakia, Denmark, East European Russia, Finland, France, Germany, Great Britain, Greece, Hungary, India, Inner Mongolia, Ireland, Irkutsk, Italy, Japan, Kazakhstan, Khabarovsk, Korea, Krasnoyarsk, Krym, Kuril Is., Magadan, Manchuri…	Sp. Pl.: 335 (1753)	0	L.	0	Linné, Carl von;Linnaeus, Carl
Ruppia maritima		1753	1753	L.	Alabama, Alaska, Aldabra, Algeria, Altay, Angola, Argentina Northeast, Argentina Northwest, Aruba, Assam, Azores, Bahamas, Baleares, Baltic States, Bangladesh, Belarus, Belgium, Belize, Bermuda, Bolivia, Brazil Northeast, Brazil South, Brazil Southeast, British Columbia, Bulgaria, California, Canary Is., Cape Provinces, Cape Verde, Cayman Is., Central American Pac, Central European Rus, Chile Cen…	Sp. Pl.: 127 (1753)	0	L.	0	Linné, Carl von;Linnaeus, Carl
Sacciolepis indica	Aira indica	1753	1908	(L.) Chase	Andaman Is., Angola, Assam, Bangladesh, Benin, Borneo, Burkina, Burundi, Cambodia, Cameroon, Cape Provinces, Central African Repu, Chad, China North-Central, China South-Central, China Southeast, Congo, East Himalaya, Ethiopia, Ghana, Guinea, Guinea-Bissau, Hainan, Ivory Coast, Japan, Jawa, Kenya, Korea, Laos, Lesser Sunda Is., Malawi, Malaya, Mali, Manchuria, Mozambique, Myanmar, Nansei-shoto, N…	Proc. Biol. Soc. Washington 21: 8 (1908)	0	L.	0	Linné, Carl von;Linnaeus, Carl
Sagina procumbens		1753	1753	L.	Albania, Algeria, Altay, Austria, Baltic States, Belarus, Belgium, Bulgaria, Buryatiya, Canary Is., Central European Rus, Chita, Corse, Czechoslovakia, Denmark, East European Russia, East Himalaya, Finland, France, Føroyar, Germany, Greece, Hungary, Iceland, Iran, Ireland, Irkutsk, Italy, Kazakhstan, Krasnoyarsk, Krym, Lebanon-Syria, Madeira, Morocco, Netherlands, North European Russi, Northwest …	Sp. Pl.: 128 (1753)	0	L.	0	Linné, Carl von;Linnaeus, Carl
Sagina saginoides	Spergula saginoides	1753	1882	(L.) H.Karst.	Afghanistan, Alaska, Albania, Alberta, Aleutian Is., Altay, Arizona, Austria, British Columbia, Bulgaria, Buryatiya, California, China South-Central, Colorado, Corse, Czechoslovakia, East Himalaya, Finland, France, Germany, Great Britain, Greece, Greenland, Iceland, Idaho, India, Inner Mongolia, Iran, Iraq, Irkutsk, Italy, Japan, Kamchatka, Kazakhstan, Khabarovsk, Kirgizstan, Korea, Krasnoyarsk, …	Deut. Fl.: 539 (1882)	0	L.	0	Linné, Carl von;Linnaeus, Carl
Sagittaria trifolia		1753	1753	L.	Afghanistan, Amur, Assam, Bangladesh, Buryatiya, China North-Central, China South-Central, China Southeast, Chita, East Himalaya, Hainan, India, Inner Mongolia, Iran, Iraq, Japan, Kazakhstan, Khabarovsk, Kirgizstan, Korea, Krasnoyarsk, Laos, Malaya, Manchuria, Myanmar, Nansei-shoto, Nepal, Nicobar Is., North Caucasus, Pakistan, Philippines, Primorye, South European Russi, Sulawesi, Sumatera, Tadz…	Sp. Pl.: 993 (1753)	0	L.	0	Linné, Carl von;Linnaeus, Carl
Salix alba		1753	1753	L.	Afghanistan, Albania, Algeria, Altay, Austria, Baltic States, Belarus, Belgium, Bulgaria, Central European Rus, China North-Central, Corse, Cyprus, Czechoslovakia, East Aegean Is., East European Russia, France, Germany, Great Britain, Greece, Hungary, Inner Mongolia, Iran, Iraq, Ireland, Italy, Kazakhstan, Kriti, Krym, Lebanon-Syria, Morocco, Netherlands, North Caucasus, Palestine, Poland, Portug…	Sp. Pl.: 1021 (1753)	0	L.	0	Linné, Carl von;Linnaeus, Carl
Salix babylonica		1753	1753	L.	China North-Central, China Southeast, Inner Mongolia, Korea, Manchuria, Qinghai	Sp. Pl.: 1017 (1753)	0	L.	0	Linné, Carl von;Linnaeus, Carl
Salix glauca		1753	1753	L.	Alaska, Alberta, Altay, Austria, British Columbia, Buryatiya, China North-Central, Chita, Colorado, East European Russia, Finland, Føroyar, Greenland, Iceland, Irkutsk, Italy, Kamchatka, Kazakhstan, Khabarovsk, Korea, Krasnoyarsk, Magadan, Manitoba, Montana, New Mexico, Newfoundland, North European Russi, Northwest Territorie, Norway, Nova Scotia, Nunavut, Ontario, Oregon, Québec, Sakhalin, Saska…	Sp. Pl.: 1029 (1753)	0	L.	0	Linné, Carl von;Linnaeus, Carl
Salix pentandra		1753	1753	L.	Albania, Altay, Austria, Baltic States, Bulgaria, Central European Rus, China North-Central, Czechoslovakia, Denmark, East European Russia, Finland, France, Germany, Great Britain, Hungary, Inner Mongolia, Ireland, Italy, Kazakhstan, Manchuria, Mongolia, Netherlands, North European Russi, Northwest European R, Norway, Poland, Romania, South European Russi, Spain, Sweden, Switzerland, Tadzhikistan…	Sp. Pl.: 1016 (1753)	0	L.	0	Linné, Carl von;Linnaeus, Carl
Salix viminalis		1753	1753	L.	Albania, Altay, Austria, Baltic States, Buryatiya, Central European Rus, Czechoslovakia, East European Russia, France, Germany, Hungary, Irkutsk, Kazakhstan, Krasnoyarsk, Mongolia, North European Russi, Northwest European R, Poland, Switzerland, Turkey, Tuva, Ukraine, West Siberia, Xinjiang, Yakutskiya, Yugoslavia	Sp. Pl.: 1021 (1753)	0	L.	0	Linné, Carl von;Linnaeus, Carl
Salomonia ciliata	Polygala ciliata	1753	1824	(L.) DC.	Assam, Bangladesh, Borneo, Cambodia, China South-Central, China Southeast, East Himalaya, Hainan, India, Japan, Jawa, Korea, Laos, Malaya, Myanmar, Nepal, New Guinea, Philippines, Solomon Is., Sri Lanka, Sumatera, Taiwan, Thailand, Vietnam	Prodr. 1: 334 (1824)	0	L.	0	Linné, Carl von;Linnaeus, Carl
Salsola foliosa	Anabasis foliosa	1753	1820	(L.) Schrad. ex Schult.	Kazakhstan, Kirgizstan, South European Russi, Turkmenistan, Uzbekistan, Xinjiang	J.J.Roemer &amp; J.A.Schultes, Syst. Veg., ed. 15 bis 6: 235 (1820)	0	L.	0	Linné, Carl von;Linnaeus, Carl
Salvinia natans	Marsilea natans	1753	1785	(L.) All.	Afghanistan, Algeria, Altay, Amur, Assam, Baltic States, Bangladesh, Belarus, Bulgaria, China North-Central, China South-Central, China Southeast, Czechoslovakia, East European Russia, Germany, Greece, Hainan, Hungary, Inner Mongolia, Iran, Iraq, Italy, Japan, Jawa, Kazakhstan, Khabarovsk, Korea, Krym, Lebanon-Syria, Manchuria, Nepal, Netherlands, Northwest European R, Pakistan, Palestine, Poland…	Fl. Pedem. 2: 289 (1785)	0	L.	0	Linné, Carl von;Linnaeus, Carl
Samolus valerandi		1753	1753	L.	Afghanistan, Albania, Algeria, Angola, Austria, Baleares, Baltic States, Belgium, Botswana, Bulgaria, Canary Is., Cape Provinces, Cape Verde, Chad, China South-Central, China Southeast, Corse, Cyprus, Czechoslovakia, Denmark, East Aegean Is., Egypt, Eritrea, Ethiopia, Finland, France, Germany, Great Britain, Greece, Hungary, Iran, Iraq, Ireland, Italy, Kenya, Kirgizstan, Kriti, Krym, KwaZulu-Nata…	Sp. Pl.: 443 (1753)	0	L.	0	Linné, Carl von;Linnaeus, Carl
Sanguisorba officinalis		1753	1753	L.	Alaska, Albania, Altay, Amur, Austria, Baltic States, Belarus, Belgium, British Columbia, Bulgaria, Buryatiya, California, Central European Rus, China North-Central, China South-Central, China Southeast, Chita, Czechoslovakia, East European Russia, France, Germany, Great Britain, Greece, Hungary, Iceland, Inner Mongolia, Iran, Ireland, Irkutsk, Italy, Japan, Kamchatka, Kazakhstan, Khabarovsk, Kir…	Sp. Pl.: 116 (1753)	0	L.	0	Linné, Carl von;Linnaeus, Carl
Satureja hortensis		1753	1753	L.	Albania, Altay, Italy, Kazakhstan, Krym, West Himalaya, Xinjiang, Yugoslavia	Sp. Pl.: 568 (1753)	0	L.	0	Linné, Carl von;Linnaeus, Carl
Saussurea alpina	Serratula alpina	1753	1810	(L.) DC.	Altay, Austria, Baltic States, Buryatiya, Chita, Czechoslovakia, East European Russia, Finland, France, Germany, Great Britain, Ireland, Irkutsk, Italy, Krasnoyarsk, Mongolia, North European Russi, Northwest European R, Norway, Poland, Romania, Spain, Sweden, Switzerland, Tadzhikistan, Tuva, Ukraine, West Siberia, Xinjiang, Yakutskiya, Yugoslavia	Ann. Mus. Natl. Hist. Nat. 16: 198 (1810)	0	L.	0	Linné, Carl von;Linnaeus, Carl
Saussurea amara	Serratula amara	1753	1810	(L.) DC.	Altay, Amur, Baltic States, Belarus, Buryatiya, Central European Rus, China North-Central, China Southeast, Chita, East European Russia, Inner Mongolia, Irkutsk, Kazakhstan, Kirgizstan, Krasnoyarsk, Manchuria, Mongolia, North European Russi, Northwest European R, Primorye, Qinghai, Tadzhikistan, Tuva, Ukraine, Uzbekistan, Vietnam, West Siberia, Xinjiang, Yakutskiya	Ann. Mus. Natl. Hist. Nat. 16: 200. (1810)	0	L.	0	Linné, Carl von;Linnaeus, Carl
Saxifraga bronchialis		1753	1753	L.	Amur, Buryatiya, Chita, Inner Mongolia, Irkutsk, Khabarovsk, Krasnoyarsk, Manchuria, Mongolia, Primorye, West Siberia, Yakutskiya	Sp. Pl.: 400 (1753)	0	L.	0	Linné, Carl von;Linnaeus, Carl
Saxifraga cernua		1753	1753	L.	Alaska, Alberta, Altay, Amur, Austria, British Columbia, Buryatiya, China North-Central, China South-Central, Chita, Colorado, Czechoslovakia, East European Russia, Finland, France, Great Britain, Greenland, Iceland, Idaho, Inner Mongolia, Irkutsk, Italy, Japan, Kamchatka, Kazakhstan, Khabarovsk, Kirgizstan, Korea, Krasnoyarsk, Labrador, Magadan, Manchuria, Manitoba, Minnesota, Mongolia, Montana,…	Sp. Pl.: 403 (1753)	0	L.	0	Linné, Carl von;Linnaeus, Carl
Saxifraga hirculus		1753	1753	L.	Afghanistan, Alaska, Aleutian Is., Altay, Baltic States, Belarus, British Columbia, Buryatiya, Central European Rus, China North-Central, China South-Central, Chita, Colorado, Denmark, East European Russia, Finland, France, Germany, Great Britain, Greenland, Iceland, Ireland, Irkutsk, Kamchatka, Kazakhstan, Khabarovsk, Kirgizstan, Krasnoyarsk, Magadan, Manitoba, Mongolia, Montana, New Mexico, Nor…	Sp. Pl.: 402 (1753)	0	L.	0	Linné, Carl von;Linnaeus, Carl
Saxifraga oppositifolia		1753	1753	L.	Albania, Alberta, Aleutian Is., Altay, Austria, British Columbia, Bulgaria, Buryatiya, Chita, Colorado, Czechoslovakia, Finland, France, Føroyar, Germany, Great Britain, Greece, Greenland, Iceland, Idaho, Ireland, Irkutsk, Italy, Kamchatka, Kazakhstan, Khabarovsk, Kirgizstan, Krasnoyarsk, Labrador, Magadan, Manitoba, Mongolia, Montana, New York, Newfoundland, North European Russi, Northwest Terri…	Sp. Pl.: 402 (1753)	0	L.	0	Linné, Carl von;Linnaeus, Carl
Scabiosa ochroleuca		1753	1753	L.	Albania, Algeria, Altay, Austria, Baltic States, Belarus, Bulgaria, Buryatiya, Central European Rus, Czechoslovakia, East European Russia, Germany, Greece, Hungary, Irkutsk, Italy, Kazakhstan, Kirgizstan, Krasnoyarsk, Lebanon-Syria, Mongolia, North Caucasus, Poland, Romania, South European Russi, Turkey, Turkey-in-Europe, Tuva, Ukraine, West Siberia, Xinjiang, Yakutskiya, Yugoslavia	Sp. Pl.: 101 (1753)	0	L.	0	Linné, Carl von;Linnaeus, Carl
Scaevola plumieri	Lobelia plumieri	1753	1791	(L.) Vahl	Andaman Is., Angola, Bahamas, Benin, Bermuda, Brazil Northeast, Brazil South, Brazil Southeast, Cambodia, Cape Provinces, Cayman Is., Chagos Archipelago, Congo, Cuba, Dominican Republic, Ecuador, Gabon, Galápagos, Ghana, Guinea, Guinea-Bissau, Gulf of Guinea Is., Haiti, Ivory Coast, Jamaica, Kazan-retto, Kenya, KwaZulu-Natal, Leeward Is., Liberia, Madagascar, Malaya, Mauritius, Mexican Pacific Is…	Symb. Bot. 2: 36 (1791)	0	L.	0	Linné, Carl von;Linnaeus, Carl
Scheuchzeria palustris		1753	1753	L.	Alaska, Alberta, Altay, Amur, Austria, Baltic States, Belarus, Belgium, British Columbia, Buryatiya, California, Central European Rus, China North-Central, China South-Central, Chita, Connecticut, Czechoslovakia, Denmark, East European Russia, Finland, France, Germany, Great Britain, Idaho, Illinois, Indiana, Inner Mongolia, Iowa, Irkutsk, Italy, Japan, Kamchatka, Khabarovsk, Korea, Krasnoyarsk, …	Sp. Pl.: 338 (1753)	0	L.	0	Linné, Carl von;Linnaeus, Carl
Schismus barbatus	Festuca barbata	1753	1907	(L.) Thell.	Afghanistan, Algeria, Botswana, Canary Is., Cape Provinces, Chad, Cyprus, Egypt, France, Free State, Gulf States, Iran, Iraq, Kazakhstan, Kriti, Kuwait, Lebanon-Syria, Lesotho, Libya, Madeira, Mauritania, Morocco, Namibia, Oman, Pakistan, Palestine, Saudi Arabia, Sinai, Spain, Sudan, Tibet, Transcaucasus, Tunisia, Turkmenistan, Western Sahara	Bull. Herb. Boissier, sér. 2, 7: 391 (1907)	0	L.	0	Linné, Carl von;Linnaeus, Carl
Schizaea dichotoma	Acrostichum dichotomum	1753	1793	(L.) Sm.	Andaman Is., Bismarck Archipelago, Borneo, Caroline Is., Cook Is., Fiji, Hainan, India, Kermadec Is., Madagascar, Malaya, Maluku, Marianas, Marquesas, Mauritius, Myanmar, Nansei-shoto, New Caledonia, New Guinea, New South Wales, New Zealand North, Nicobar Is., Niue, Northern Territory, Philippines, Queensland, Réunion, Samoa, Society Is., Solomon Is., Sulawesi, Sumatera, Taiwan, Tanzania, Thailan…	Mém. Acad. Roy. Sci. (Turin) 5. 422 (1793)	0	L.	0	Linné, Carl von;Linnaeus, Carl
Schoenoplectiella articulata	Scirpus articulatus	1753	2003	(L.) Lye	Angola, Assam, Bangladesh, Botswana, Burundi, Cameroon, Cape Provinces, Chad, East Himalaya, Egypt, Ethiopia, Ghana, Hainan, India, Jawa, Kenya, KwaZulu-Natal, Lesser Sunda Is., Madagascar, Mauritius, Mozambique, Myanmar, Namibia, Nepal, New Guinea, Niger, Nigeria, Northern Provinces, Northern Territory, Philippines, Queensland, Senegal, Somalia, Sri Lanka, Sudan, Sulawesi, Swaziland, Tanzania, T…	Lidia 6: 20 (2003)	0	L.	0	Linné, Carl von;Linnaeus, Carl
Schoenoplectiella mucronata	Scirpus mucronatus	1753	2010	(L.) J.Jung & H.K.Choi	Afghanistan, Angola, Assam, Austria, Azores, Bangladesh, Borneo, Bulgaria, Cameroon, Central African Repu, China North-Central, China South-Central, China Southeast, Congo, Corse, Czechoslovakia, East Himalaya, France, Gabon, Germany, Greece, Guinea, Guinea-Bissau, Gulf of Guinea Is., Hainan, Hungary, India, Iran, Iraq, Italy, Japan, Jawa, Kazakhstan, Kirgizstan, Korea, Lesser Sunda Is., Liberia,…	J. Pl. Biol. 53(3): 230 (2010)	0	L.	0	Linné, Carl von;Linnaeus, Carl
Schoenoplectiella supina	Scirpus supinus	1753	2003	(L.) Lye	Albania, Algeria, Altay, Argentina Northeast, Assam, Austria, Bangladesh, Brazil South, Bulgaria, Central European Rus, Chad, Czechoslovakia, Egypt, France, Germany, Greece, Hungary, India, Iran, Italy, Kazakhstan, Krasnoyarsk, Krym, Madagascar, Mali, Mongolia, Nigeria, North Caucasus, Pakistan, Palestine, Paraguay, Poland, Romania, Senegal, South European Russi, Spain, Sudan, Switzerland, Togo, …	Lidia 6: 27 (2003)	0	L.	0	Linné, Carl von;Linnaeus, Carl
Schoenoplectus lacustris	Scirpus lacustris	1753	1888	(L.) Palla	Afghanistan, Albania, Algeria, Altay, Amur, Austria, Baltic States, Belarus, Belgium, Bulgaria, Buryatiya, Cape Provinces, Central European Rus, Chita, Corse, Czechoslovakia, Denmark, East European Russia, Eritrea, Finland, France, Free State, Germany, Great Britain, Greece, Hungary, India, Iran, Ireland, Irkutsk, Italy, Kazakhstan, Khabarovsk, Kirgizstan, Krasnoyarsk, Kriti, Krym, Lesotho, Libya…	Bot. Jahrb. Syst. 10: 299 (1888)	0	L.	0	Linné, Carl von;Linnaeus, Carl
Scleria lithosperma	Scirpus lithospermus	1753	1788	(L.) Sw.	Andaman Is., Angola, Assam, Bahamas, Bangladesh, Benin, Bolivia, Borneo, Brazil West-Central, Burkina, Caroline Is., Cayman Is., China South-Central, China Southeast, Comoros, Costa Rica, Cuba, Dominican Republic, East Himalaya, Ethiopia, Fiji, Florida, French Guiana, Ghana, Guatemala, Hainan, Haiti, Honduras, India, Ivory Coast, Jamaica, Jawa, Kenya, Leeward Is., Lesser Sunda Is., Louisiana, Mad…	Prodr. Veg. Ind. Occ.: 18 (1788)	0	L.	0	Linné, Carl von;Linnaeus, Carl
Scleria terrestris	Zizania terrestris	1753	1924	(L.) Fassett	Andaman Is., Assam, Bangladesh, Borneo, Cambodia, China South-Central, China Southeast, East Himalaya, Hainan, India, Jawa, Laos, Lesser Sunda Is., Malaya, Maluku, Myanmar, Nansei-shoto, Nepal, New Guinea, Nicobar Is., Northern Territory, Philippines, Queensland, Sri Lanka, Sulawesi, Sumatera, Taiwan, Thailand, Tibet, Vietnam, West Himalaya	Rhodora 26: 159 (1924)	0	L.	0	Linné, Carl von;Linnaeus, Carl
Sclerochloa dura	Cynosurus durus	1753	1812	(L.) P.Beauv.	Afghanistan, Algeria, Austria, Bulgaria, Cyprus, Czechoslovakia, France, Germany, Greece, Hungary, Iran, Iraq, Italy, Kazakhstan, Kirgizstan, Krym, Lebanon-Syria, Morocco, North Caucasus, Pakistan, Palestine, Poland, Romania, South European Russi, Spain, Switzerland, Tadzhikistan, Transcaucasus, Tunisia, Turkey, Turkey-in-Europe, Turkmenistan, Ukraine, Uzbekistan, West Himalaya, Xinjiang, Yugosla…	Ess. Agrostogr.: 98 (1812)	0	L.	0	Linné, Carl von;Linnaeus, Carl
Scurrula parasitica		1753	1753	L.	Andaman Is., Bangladesh, China South-Central, China Southeast, East Himalaya, Hainan, India, Lesser Sunda Is., Malaya, Maluku, Myanmar, Philippines, Sri Lanka, Taiwan, Thailand, Tibet, Vietnam	Sp. Pl.: 110 (1753)	0	L.	0	Linné, Carl von;Linnaeus, Carl
Scutellaria galericulata		1753	1753	L.	Alaska, Albania, Alberta, Altay, Amur, Arizona, Austria, Baltic States, Belarus, Belgium, British Columbia, Bulgaria, Buryatiya, California, Central European Rus, China North-Central, Chita, Colorado, Connecticut, Corse, Czechoslovakia, Delaware, Denmark, East European Russia, Finland, Florida, France, Georgia, Germany, Great Britain, Greece, Hungary, Idaho, Illinois, Indiana, Inner Mongolia, Iow…	Sp. Pl.: 599 (1753)	0	L.	0	Linné, Carl von;Linnaeus, Carl
Scutellaria indica		1753	1753	L.	Cambodia, China South-Central, China Southeast, Japan, Jawa, Korea, Laos, Lesser Sunda Is., Malaya, Maluku, Myanmar, New Guinea, Philippines, Sulawesi, Sumatera, Taiwan, Thailand, Vietnam	Sp. Pl.: 600 (1753)	0	L.	0	Linné, Carl von;Linnaeus, Carl
Scutellaria supina		1753	1753	L.	Altay, Central European Rus, East European Russia, Kazakhstan, Krasnoyarsk, Mongolia, South European Russi, Ukraine, West Siberia, Xinjiang	Sp. Pl.: 598 (1753)	0	L.	0	Linné, Carl von;Linnaeus, Carl
Selaginella helvetica	Lycopodium helveticum	1753	1838	(L.) Spring	Albania, Amur, Austria, Bulgaria, Buryatiya, China North-Central, China South-Central, Chita, Czechoslovakia, East Himalaya, France, Germany, Greece, Hungary, Inner Mongolia, Iran, Italy, Japan, Khabarovsk, Korea, Krasnoyarsk, Kuril Is., Manchuria, Mongolia, Nepal, Poland, Primorye, Qinghai, Romania, Switzerland, Tibet, Transcaucasus, Turkey, Ukraine, West Himalaya, Yugoslavia; Extinct in: Belgium	Flora 21: 149 (1838)	0	L.	0	Linné, Carl von;Linnaeus, Carl
Selaginella sanguinolenta	Lycopodium sanguinolentum	1753	1843	(L.) Spring	Amur, Buryatiya, China North-Central, China South-Central, China Southeast, Chita, Inner Mongolia, Irkutsk, Kamchatka, Khabarovsk, Krasnoyarsk, Manchuria, Mongolia, Primorye, Qinghai, Tibet, Tuva, Yakutskiya	Bull. Acad. Roy. Sci. Bruxelles 10(1): 135 (1843)	0	L.	0	Linné, Carl von;Linnaeus, Carl
Senecio nemorensis		1753	1753	L.	Altay, Amur, Buryatiya, China North-Central, China South-Central, China Southeast, Chita, East European Russia, Inner Mongolia, Irkutsk, Japan, Kazakhstan, Khabarovsk, Kirgizstan, Korea, Krasnoyarsk, Kuril Is., Manchuria, Mongolia, North European Russi, Primorye, Sakhalin, Taiwan, Tuva, Vietnam, West Siberia, Xinjiang, Yakutskiya	Sp. Pl.: 870 (1753)	0	L.	0	Linné, Carl von;Linnaeus, Carl
Senecio vulgaris		1753	1753	L.	Afghanistan, Albania, Algeria, Altay, Austria, Azores, Baleares, Baltic States, Belarus, Belgium, Bulgaria, Buryatiya, Canary Is., Central European Rus, China South-Central, Corse, Cyprus, Czechoslovakia, Denmark, East Aegean Is., East European Russia, Egypt, Finland, France, Føroyar, Germany, Great Britain, Greece, Gulf States, Hungary, Iceland, Inner Mongolia, Iran, Iraq, Ireland, Irkutsk, Ital…	Sp. Pl.: 867 (1753)	0	L.	0	Linné, Carl von;Linnaeus, Carl
Senegalia caesia	Mimosa caesia	1753	2013	(L.) Maslin, Seigler & Ebinger	Assam, Bangladesh, Cambodia, China South-Central, East Himalaya, Hainan, India, Laos, Myanmar, Sri Lanka, Thailand, Vietnam, West Himalaya	Blumea 58: 40 (2013)	0	L.	0	Linné, Carl von;Linnaeus, Carl
Senegalia pennata	Mimosa pennata	1753	2012	(L.) Maslin	Andaman Is., Assam, Bangladesh, China South-Central, East Himalaya, India, Myanmar, Nepal, Seychelles, Sri Lanka	Nuytsia 22: 466 (2012)	0	L.	0	Linné, Carl von;Linnaeus, Carl
Seseli condensatum	Athamanta condensata	1753	1863	(L.) Rchb.f.	Altay, Amur, Buryatiya, China North-Central, Chita, East European Russia, Inner Mongolia, Irkutsk, Kazakhstan, Khabarovsk, Krasnoyarsk, Mongolia, North European Russi, Sakhalin, Tuva, West Siberia, Xinjiang, Yakutskiya	H.G.L.Reichenbach, Icon. Fl. Germ. Helv. 21: 37 (1863)	0	L.	0	Linné, Carl von;Linnaeus, Carl
Seseli sibiricum	Athamanta sibirica	1753	1849	(L.) Garcke	China North-Central, East European Russia, Kazakhstan, West Himalaya, Xinjiang	Fl. N. Mitt.-Deutschland: 139 (1849)	0	L.	0	Linné, Carl von;Linnaeus, Carl
Sesuvium portulacastrum	Portulaca portulacastrum	1753	1759	(L.) L.	Alabama, Aldabra, Angola, Argentina Northeast, Argentina Northwest, Argentina South, Aruba, Bahamas, Bangladesh, Belize, Benin, Bermuda, Bolivia, Brazil North, Brazil Northeast, Brazil South, Brazil Southeast, Brazil West-Central, Cambodia, Cameroon, Canary Is., Cayman Is., Chile North, China Southeast, Christmas I., Cocos (Keeling) Is., Colombia, Cook Is., Cuba, Dominican Republic, Ecuador, El S…	Syst. Nat. ed. 10, 2: 1058 (1759)	0	L.	0	Linné, Carl von;Linnaeus, Carl
Setaria italica	Panicum italicum	1753	1812	(L.) P.Beauv.	China North-Central, China Southeast	Ess. Agrostogr.: 51 (1812)	1	L.	0	Linné, Carl von;Linnaeus, Carl
Sibbaldia procumbens		1753	1753	L.	Alaska, Alberta, Altay, Amur, Arizona, Austria, British Columbia, Bulgaria, California, Colorado, Corse, East European Russia, Finland, France, Føroyar, Germany, Great Britain, Greenland, Iceland, Idaho, Italy, Japan, Kamchatka, Kazakhstan, Khabarovsk, Kirgizstan, Korea, Labrador, Magadan, Manchuria, Mexico Central, Mexico Gulf, Montana, Nevada, New Hampshire, New Mexico, Newfoundland, North Euro…	Sp. Pl.: 284 (1753)	0	L.	0	Linné, Carl von;Linnaeus, Carl
Sibbaldianthe bifurca	Potentilla bifurca	1753	2003	(L.) Kurtto & T.Erikss.	Afghanistan, Altay, Amur, China North-Central, China South-Central, Chita, East Himalaya, Iran, Irkutsk, Kazakhstan, Khabarovsk, Korea, Krasnoyarsk, Manchuria, Mongolia, Nepal, Primorye, Qinghai, Transcaucasus, Turkey, Tuva, West Siberia, Xinjiang, Yakutskiya	Ann. Bot. Fenn. 40: 139 (2003)	0	L.	0	Linné, Carl von;Linnaeus, Carl
Sida cordifolia		1753	1753	L.	Assam, Bangladesh, Cambodia, China South-Central, China Southeast, East Himalaya, Hainan, Howland-Baker Is., India, Laos, Lesser Sunda Is., Malaya, Myanmar, Nepal, Pakistan, Philippines, South China Sea, Sri Lanka, Taiwan, Thailand, Vietnam, West Himalaya	Sp. Pl.: 684 (1753)	0	L.	0	Linné, Carl von;Linnaeus, Carl
Sida rhombifolia		1753	1753	L.	Angola, Bangladesh, Benin, Botswana, Burkina, Burundi, Cambodia, Cameroon, Cape Provinces, Cape Verde, Central African Repu, Chad, China South-Central, China Southeast, Christmas I., Congo, East Himalaya, Eritrea, Ethiopia, Free State, Gabon, Gambia, Ghana, Guinea, Guinea-Bissau, Gulf of Guinea Is., Hainan, India, Ivory Coast, Japan, Kazan-retto, KwaZulu-Natal, Laos, Lesotho, Lesser Sunda Is., Li…	Sp. Pl.: 684 (1753)	0	L.	0	Linné, Carl von;Linnaeus, Carl
Sideritis montana		1753	1753	L.	Afghanistan, Albania, Algeria, Austria, Baleares, Bulgaria, Central European Rus, Czechoslovakia, East Aegean Is., France, Greece, Hungary, Iran, Italy, Kirgizstan, Krym, Lebanon-Syria, Morocco, North Caucasus, Palestine, Romania, South European Russi, Spain, Transcaucasus, Tunisia, Turkey, Turkey-in-Europe, Turkmenistan, Ukraine, West Himalaya, Xinjiang, Yugoslavia	Sp. Pl.: 575 (1753)	0	L.	0	Linné, Carl von;Linnaeus, Carl
Sigesbeckia orientalis		1753	1753	L.	Amur, Angola, Baltic States, Belarus, Borneo, Cambodia, Cameroon, Central European Rus, China North-Central, China South-Central, China Southeast, East European Russia, East Himalaya, Eritrea, Ethiopia, Hainan, India, Inner Mongolia, Iran, Japan, Jawa, Kazakhstan, Khabarovsk, Kirgizstan, Korea, Laos, Lesser Sunda Is., Madagascar, Malawi, Malaya, Maluku, Manchuria, Mauritius, Mozambique, Myanmar, …	Sp. Pl.: 900 (1753)	0	L.	0	Linné, Carl von;Linnaeus, Carl
Silene amoena		1753	1753	L.	Altay, Central European Rus, East European Russia, Inner Mongolia, Irkutsk, Kazakhstan, Kirgizstan, Krasnoyarsk, Mongolia, North European Russi, Tadzhikistan, Tibet, Tuva, West Siberia, Xinjiang	Sp. Pl.: 417 (1753)	0	L.	0	Linné, Carl von;Linnaeus, Carl
Silene baccifera	Cucubalus baccifer	1753	1782	(L.) Durande	Afghanistan, Albania, Austria, Baltic States, Belarus, Belgium, Bulgaria, Central European Rus, China North-Central, China South-Central, China Southeast, Czechoslovakia, East European Russia, East Himalaya, France, Germany, Greece, Hungary, Inner Mongolia, Iraq, Italy, Japan, Kazakhstan, Korea, Krym, Kuril Is., Lebanon-Syria, Manchuria, Nepal, Netherlands, Northwest European R, Poland, Portugal,…	Fl. Bourgogne 1: 260 (1782)	0	L.	0	Linné, Carl von;Linnaeus, Carl
Silene chalcedonica	Lychnis chalcedonica	1753	1901	(L.) E.H.L.Krause	Altay, Central European Rus, China North-Central, East European Russia, Irkutsk, Kazakhstan, Khabarovsk, Krasnoyarsk, Mongolia, South European Russi, West Siberia, Xinjiang	J.Sturm, Deutschl. Fl. Abbild., ed. 2, 5: 96 (1901)	0	L.	0	Linné, Carl von;Linnaeus, Carl
Silene conoidea		1753	1753	L.	Afghanistan, Algeria, Canary Is., Cyprus, Egypt, France, Greece, India, Iran, Iraq, Kazakhstan, Kirgizstan, Lebanon-Syria, Libya, Morocco, Oman, Pakistan, Palestine, Saudi Arabia, Sinai, Spain, Tadzhikistan, Tibet, Turkey, Turkey-in-Europe, Turkmenistan, Uzbekistan, West Himalaya, Xinjiang; Extinct in: Italy	Sp. Pl.: 418 (1753)	0	L.	0	Linné, Carl von;Linnaeus, Carl
Silene noctiflora		1753	1753	L.	Altay, Austria, Baltic States, Belarus, Belgium, Bulgaria, Buryatiya, Central European Rus, Czechoslovakia, East European Russia, France, Germany, Great Britain, Greece, Hungary, Iran, Iraq, Italy, Kazakhstan, Kirgizstan, Korea, Krasnoyarsk, Krym, Lebanon-Syria, Netherlands, Northwest European R, Poland, Romania, South European Russi, Switzerland, Tadzhikistan, Turkey, Turkey-in-Europe, Ukraine, …	Sp. Pl.: 419 (1753)	0	L.	0	Linné, Carl von;Linnaeus, Carl
Sinapis alba		1753	1753	L.	Afghanistan, Albania, Altay, Austria, Baleares, Baltic States, Belarus, Belgium, Bulgaria, Central European Rus, China North-Central, China South-Central, China Southeast, Corse, Cyprus, Denmark, East Aegean Is., East European Russia, France, Great Britain, Greece, Hungary, India, Iran, Iraq, Ireland, Italy, Krasnoyarsk, Kriti, Krym, Laos, Lebanon-Syria, Manchuria, Netherlands, Northwest European…	Sp. Pl.: 668 (1753)	0	L.	0	Linné, Carl von;Linnaeus, Carl
Sinapis arvensis		1753	1753	L.	Afghanistan, Albania, Algeria, Altay, Austria, Azores, Baleares, Baltic States, Belarus, Belgium, Bulgaria, Central European Rus, Corse, Cyprus, Czechoslovakia, Denmark, East Aegean Is., East European Russia, Egypt, France, Føroyar, Germany, Great Britain, Greece, Gulf States, Hungary, Inner Mongolia, Iran, Iraq, Ireland, Italy, Kamchatka, Kazakhstan, Khabarovsk, Kirgizstan, Krasnoyarsk, Kriti, K…	Sp. Pl.: 668 (1753)	0	L.	0	Linné, Carl von;Linnaeus, Carl
Sisymbrium altissimum		1753	1753	L.	Afghanistan, Albania, Altay, Belarus, Bulgaria, Buryatiya, Central European Rus, East European Russia, Greece, Hungary, Iran, Iraq, Irkutsk, Italy, Kazakhstan, Kirgizstan, Krasnoyarsk, Krym, Lebanon-Syria, Manchuria, North Caucasus, Pakistan, Poland, Romania, South European Russi, Tibet, Transcaucasus, Turkey, Turkey-in-Europe, Turkmenistan, Ukraine, Uzbekistan, West Himalaya, West Siberia, Xinji…	Sp. Pl.: 659 (1753)	0	L.	0	Linné, Carl von;Linnaeus, Carl
Sisymbrium irio		1753	1753	L.	Afghanistan, Algeria, Baleares, Bulgaria, Canary Is., Corse, Cyprus, Czechoslovakia, East Aegean Is., Egypt, Eritrea, France, Greece, Gulf States, Hungary, Inner Mongolia, Iran, Iraq, Italy, Kirgizstan, Kriti, Kuwait, Lebanon-Syria, Libya, Madeira, Mauritania, Morocco, Nepal, Niger, Oman, Pakistan, Palestine, Portugal, Romania, Sardegna, Saudi Arabia, Sicilia, Sinai, Somalia, Spain, Sudan, Switze…	Sp. Pl.: 659 (1753)	0	L.	0	Linné, Carl von;Linnaeus, Carl
Sium latifolium		1753	1753	L.	Albania, Altay, Austria, Baltic States, Belarus, Belgium, Bulgaria, Buryatiya, Central European Rus, Czechoslovakia, Denmark, East European Russia, Finland, France, Germany, Great Britain, Greece, Hungary, Ireland, Irkutsk, Italy, Kazakhstan, Krasnoyarsk, Netherlands, North European Russi, Northwest European R, Poland, Romania, South European Russi, Spain, Sweden, Switzerland, Ukraine, West Siber…	Sp. Pl.: 251 (1753)	0	L.	0	Linné, Carl von;Linnaeus, Carl
Sium sisarum		1753	1753	L.	Afghanistan, Altay, Bulgaria, Central European Rus, Greece, Hungary, Iran, Iraq, Kazakhstan, Kirgizstan, Krym, Lebanon-Syria, Romania, South European Russi, Tadzhikistan, Transcaucasus, Turkey, Turkmenistan, Ukraine, Uzbekistan, West Siberia, Xinjiang	Sp. Pl.: 251 (1753)	0	L.	0	Linné, Carl von;Linnaeus, Carl
Smilax aspera		1753	1753	L.	Albania, Algeria, Assam, Azores, Baleares, Bangladesh, Canary Is., China South-Central, Corse, Cyprus, East Aegean Is., East Himalaya, Eritrea, Ethiopia, France, Greece, India, Iran, Italy, Kenya, Kriti, Lebanon-Syria, Libya, Madeira, Morocco, Myanmar, Nepal, Pakistan, Palestine, Portugal, Sardegna, Sicilia, Spain, Sri Lanka, Tanzania, Tibet, Tunisia, Turkey, Uganda, West Himalaya, Yugoslavia, Za…	Sp. Pl.: 1028 (1753)	0	L.	0	Linné, Carl von;Linnaeus, Carl
Smilax china		1753	1753	L.	Assam, China North-Central, China South-Central, China Southeast, Japan, Korea, Myanmar, Nansei-shoto, Ogasawara-shoto, Philippines, Taiwan, Thailand, Vietnam; Doubtfully present in: Manchuria	Sp. Pl.: 1029 (1753)	0	L.	0	Linné, Carl von;Linnaeus, Carl
Solanum dulcamara		1753	1753	L.	Afghanistan, Albania, Algeria, Altay, Amur, Austria, Azores, Baleares, Baltic States, Belarus, Belgium, Bulgaria, Buryatiya, Central European Rus, China North-Central, China South-Central, China Southeast, Chita, Corse, Czechoslovakia, Denmark, East Aegean Is., East European Russia, East Himalaya, Finland, France, Germany, Great Britain, Greece, Hungary, Inner Mongolia, Iran, Iraq, Ireland, Irkut…	Sp. Pl.: 185 (1753)	0	L.	0	Linné, Carl von;Linnaeus, Carl
Solanum melongena		1753	1753	L.	China South-Central, East Himalaya, Laos, Malaya, Myanmar, Thailand, Vietnam	Sp. Pl.: 186 (1753)	0	L.	0	Linné, Carl von;Linnaeus, Carl
Solanum nigrum		1753	1753	L.	Afghanistan, Albania, Algeria, Altay, Amur, Andaman Is., Assam, Austria, Azores, Baleares, Baltic States, Bangladesh, Belarus, Belgium, Bulgaria, Canary Is., Cape Verde, Central European Rus, Chad, China North-Central, China South-Central, China Southeast, Chita, Corse, Cyprus, Czechoslovakia, Denmark, Djibouti, East Aegean Is., East European Russia, East Himalaya, Egypt, Eritrea, Ethiopia, Finla…	Sp. Pl.: 186 (1753)	0	L.	0	Linné, Carl von;Linnaeus, Carl
Solanum virginianum		1753	1753	L.	Afghanistan, Andaman Is., Bangladesh, China South-Central, East Himalaya, Egypt, Gulf States, Hainan, India, Iran, Japan, Jawa, Malaya, Myanmar, Nepal, Oman, Pakistan, Saudi Arabia, Sri Lanka, Taiwan, Thailand, Vietnam, West Himalaya, Yemen	Sp. Pl.: 187 (1753)	0	L.	0	Linné, Carl von;Linnaeus, Carl
Sonchus palustris		1753	1753	L.	Altay, Austria, Baltic States, Belarus, Belgium, Bulgaria, Central European Rus, Czechoslovakia, Denmark, East European Russia, France, Germany, Great Britain, Hungary, Iran, Kazakhstan, Kirgizstan, Krym, Netherlands, North Caucasus, North European Russi, Northwest European R, Norway, Poland, Romania, South European Russi, Spain, Sweden, Tadzhikistan, Transcaucasus, Turkey, Turkmenistan, Ukraine,…	Sp. Pl.: 793 (1753)	0	L.	0	Linné, Carl von;Linnaeus, Carl
Sophora alopecuroides		1753	1753	L.	Afghanistan, Altay, China North-Central, China Southeast, East European Russia, Inner Mongolia, Iran, Iraq, Kazakhstan, Kirgizstan, Lebanon-Syria, Mongolia, Pakistan, Qinghai, South European Russi, Tadzhikistan, Tibet, Transcaucasus, Turkey, Turkmenistan, Uzbekistan, West Himalaya, Xinjiang	Sp. Pl.: 373 (1753)	0	L.	0	Linné, Carl von;Linnaeus, Carl
Sophora tomentosa		1753	1753	L.	Aldabra, Andaman Is., Aruba, Bahamas, Bangladesh, Belize, Bermuda, Bismarck Archipelago, Brazil North, Brazil Northeast, Brazil South, Brazil Southeast, Cambodia, Cayman Is., Central African Repu, China Southeast, Colombia, Cook Is., Costa Rica, Cuba, Dominican Republic, Fiji, Florida, Ghana, Gilbert Is., Guinea, Gulf of Guinea Is., Hainan, Haiti, Honduras, India, Ivory Coast, Jamaica, Jawa, Keny…	Sp. Pl.: 373 (1753)	0	L.	0	Linné, Carl von;Linnaeus, Carl
Sorbaria sorbifolia	Spiraea sorbifolia	1753	1860	(L.) A.Braun	Amur, Chita, Inner Mongolia, Irkutsk, Japan, Kamchatka, Khabarovsk, Korea, Krasnoyarsk, Magadan, Manchuria, Mongolia, Primorye, Sakhalin, Uzbekistan, West Siberia, Yakutskiya	P.F.A.Ascherson, Fl. Brandenburg 1: 177 (1860)	0	L.	0	Linné, Carl von;Linnaeus, Carl
Sparganium natans		1753	1753	L.	Alaska, Alberta, Altay, Amur, Austria, Baltic States, Belarus, Belgium, British Columbia, Bulgaria, Buryatiya, California, Central European Rus, China South-Central, Chita, Colorado, Connecticut, Czechoslovakia, Denmark, East European Russia, Finland, France, Germany, Great Britain, Greece, Hungary, Iceland, Idaho, Illinois, Indiana, Inner Mongolia, Iran, Ireland, Irkutsk, Italy, Kamchatka, Kazak…	Sp. Pl.: 971 (1753)	0	L.	0	Linné, Carl von;Linnaeus, Carl
Spergularia marina	Arenaria rubra var. marina	1753	1822	(L.) Besser	Afghanistan, Albania, Alberta, Algeria, Altay, Argentina Northeast, Argentina Northwest, Argentina South, Arizona, Austria, Azores, Baleares, Baltic States, Belarus, Belgium, British Columbia, Bulgaria, Buryatiya, California, Canary Is., Central European Rus, Chad, Chile Central, Chile South, China North-Central, China South-Central, China Southeast, Chita, Connecticut, Corse, Cyprus, Czechoslova…	Enum. Pl.: 97 (1822)	0	L.	0	Linné, Carl von;Linnaeus, Carl
Spergularia rubra	Arenaria rubra	1753	1819	(L.) J.Presl & C.Presl	Afghanistan, Albania, Algeria, Amur, Austria, Baleares, Baltic States, Belarus, Belgium, Bulgaria, Buryatiya, Canary Is., Central European Rus, Corse, Czechoslovakia, Denmark, East Aegean Is., East European Russia, Egypt, Eritrea, Ethiopia, Finland, France, Germany, Great Britain, Greece, Hungary, Ireland, Irkutsk, Italy, Kamchatka, Kazakhstan, Khabarovsk, Krasnoyarsk, Kriti, Kuril Is., Libya, Ma…	Fl. Cech.: 94 (1819)	0	L.	0	Linné, Carl von;Linnaeus, Carl
Spermacoce hispida		1753	1753	L.	Andaman Is., Assam, Bangladesh, China Southeast, East Himalaya, Hainan, India, Japan, Jawa, Malaya, Nansei-shoto, Nepal, Philippines, Solomon Is., South China Sea, Sri Lanka, Taiwan, Thailand, Vietnam, West Himalaya	Sp. Pl.: 102 (1753)	0	L.	0	Linné, Carl von;Linnaeus, Carl
Sphaeranthus indicus		1753	1753	L.	Andaman Is., Assam, Bangladesh, China South-Central, East Himalaya, India, Laos, Myanmar, Nepal, Northern Territory, Queensland, South Australia, Sri Lanka, Thailand, Vietnam, Western Australia	Sp. Pl.: 927 (1753)	0	L.	0	Linné, Carl von;Linnaeus, Carl
Sphagneticola calendulacea	Verbesina calendulacea	1753	1996	(L.) Pruski	Andaman Is., Assam, Bangladesh, Cambodia, China Southeast, India, Japan, Jawa, Korea, Laccadive Is., Laos, Malaya, Manchuria, Myanmar, Nansei-shoto, Philippines, Sri Lanka, Taiwan, Thailand, Vietnam	Novon 6(4): 411 (1996)	0	L.	0	Linné, Carl von;Linnaeus, Carl
Spiraea chamaedryfolia		1753	1753	L.	Altay, Amur, Austria, Bulgaria, Buryatiya, China North-Central, Greece, Inner Mongolia, Irkutsk, Japan, Kazakhstan, Khabarovsk, Kirgizstan, Korea, Krasnoyarsk, Manchuria, Mongolia, Primorye, Romania, Tuva, Uzbekistan, West Siberia, Xinjiang, Yakutskiya, Yugoslavia	Sp. Pl.: 489 (1753)	0	L.	0	Linné, Carl von;Linnaeus, Carl
Spiraea hypericifolia		1753	1753	L.	Altay, Bulgaria, Buryatiya, Central European Rus, China North-Central, China Southeast, Chita, East European Russia, Inner Mongolia, Kazakhstan, Kirgizstan, Krasnoyarsk, Krym, Manchuria, Mongolia, Nepal, South European Russi, Tadzhikistan, Turkey, Turkmenistan, Ukraine, Uzbekistan, West Himalaya, West Siberia, Xinjiang	Sp. Pl.: 489 (1753)	0	L.	0	Linné, Carl von;Linnaeus, Carl
Spiraea salicifolia		1753	1753	L.	Altay, Amur, Austria, Bulgaria, Buryatiya, China North-Central, Chita, Czechoslovakia, Hungary, Irkutsk, Japan, Kamchatka, Kazakhstan, Khabarovsk, Korea, Krasnoyarsk, Kuril Is., Magadan, Mongolia, Poland, Primorye, Romania, Sakhalin, Tuva, Ukraine, West Siberia, Yakutskiya, Yugoslavia	Sp. Pl.: 489 (1753)	0	L.	0	Linné, Carl von;Linnaeus, Carl
Spirobassia hirsuta	Chenopodium hirsutum	1753	2011	(L.) Freitag & G.Kadereit	Altay, Bulgaria, Corse, Cyprus, Denmark, France, Germany, Greece, Iran, Italy, Kazakhstan, Krym, Romania, Sardegna, South European Russi, Spain, Tadzhikistan, Transcaucasus, Turkey-in-Europe, Turkmenistan, Ukraine, Uzbekistan, West Siberia, Xinjiang; Extinct in: Netherlands, Sweden	Taxon 60: 71 (2011)	0	L.	0	Linné, Carl von;Linnaeus, Carl
Spirodela polyrhiza	Lemna polyrhiza	1753	1839	(L.) Schleid.	Alabama, Albania, Alberta, Altay, Arizona, Arkansas, Austria, Baltic States, Bangladesh, Belarus, Belgium, Belize, Benin, Borneo, Botswana, British Columbia, Bulgaria, Burundi, Buryatiya, California, Central African Repu, Central American Pac, Central European Rus, Chad, China North-Central, China South-Central, China Southeast, Christmas I., Cocos (Keeling) Is., Colombia, Colorado, Congo, Connec…	Linnaea 13: 392 (1839)	0	L.	0	Linné, Carl von;Linnaeus, Carl
Sporobolus aculeatus	Schoenus aculeatus	1753	2014	(L.) P.M.Peterson	Afghanistan, Albania, Algeria, Altay, Austria, Bulgaria, Central European Rus, Chad, China North-Central, China South-Central, China Southeast, Corse, Cyprus, Czechoslovakia, East Aegean Is., Egypt, France, Greece, Hungary, India, Inner Mongolia, Iran, Iraq, Italy, Kazakhstan, Kirgizstan, Korea, Kriti, Krym, Lebanon-Syria, Manchuria, Mauritania, Mongolia, Morocco, North Caucasus, Pakistan, Palest…	Taxon 63: 1234 (2014)	0	L.	0	Linné, Carl von;Linnaeus, Carl
Sporobolus schoenoides	Phleum schoenoides	1753	2014	(L.) P.M.Peterson	Afghanistan, Albania, Algeria, Altay, Austria, Belarus, Bulgaria, Central European Rus, Chad, China North-Central, China Southeast, Corse, Cyprus, Czechoslovakia, East Aegean Is., Egypt, France, Greece, Hungary, Inner Mongolia, Iran, Iraq, Italy, Kazakhstan, Kirgizstan, Kriti, Krym, Lebanon-Syria, Libya, Malawi, Mongolia, Morocco, Mozambique, Niger, North Caucasus, Pakistan, Palestine, Portugal, …	Taxon 63: 1234 (2014)	0	L.	0	Linné, Carl von;Linnaeus, Carl
Sporobolus virginicus	Agrostis virginica	1753	1829	(L.) Kunth	Alabama, Aldabra, Andaman Is., Angola, Aruba, Bahamas, Bangladesh, Belize, Benin, Bermuda, Brazil North, Brazil Northeast, Brazil South, Brazil Southeast, Cambodia, Cape Provinces, Cape Verde, Caroline Is., Cayman Is., Chagos Archipelago, Chile North, China Southeast, Christmas I., Colombia, Congo, Costa Rica, Cuba, Cyprus, Dominican Republic, East Aegean Is., Ecuador, Fiji, Florida, French Guian…	Révis. Gramin. 1: 67 (1829)	0	L.	0	Linné, Carl von;Linnaeus, Carl
Stachys arvensis	Glechoma arvensis	1753	1763	(L.) L.	Afghanistan, Albania, Algeria, Austria, Azores, Baleares, Baltic States, Belgium, Canary Is., Cape Verde, China Southeast, Corse, Denmark, East Aegean Is., France, Germany, Great Britain, Greece, Ireland, Italy, Kriti, Lebanon-Syria, Madeira, Morocco, Netherlands, Palestine, Poland, Portugal, Sardegna, Sicilia, Spain, Sweden, Switzerland, Taiwan, Tunisia, Turkey, Yugoslavia	Sp. Pl. ed. 2: 814 (1763)	0	L.	0	Linné, Carl von;Linnaeus, Carl
Stachys palustris		1753	1753	L.	Albania, Altay, Austria, Baltic States, Belarus, Belgium, Bulgaria, Central European Rus, Corse, Czechoslovakia, Denmark, East European Russia, Finland, France, Germany, Great Britain, Greece, Hungary, Iran, Ireland, Italy, Kazakhstan, Kirgizstan, Krasnoyarsk, Mongolia, Netherlands, North Caucasus, North European Russi, Northwest European R, Norway, Poland, Portugal, Romania, South European Russi…	Sp. Pl.: 580 (1753)	0	L.	0	Linné, Carl von;Linnaeus, Carl
Stachys sylvatica		1753	1753	L.	Albania, Altay, Austria, Baltic States, Belarus, Belgium, Bulgaria, Central European Rus, Corse, Czechoslovakia, Denmark, East European Russia, Finland, France, Germany, Great Britain, Greece, Hungary, Iran, Ireland, Italy, Kazakhstan, Kirgizstan, Krasnoyarsk, Krym, Madeira, Netherlands, Northwest European R, Norway, Poland, Portugal, Romania, Sicilia, South European Russi, Spain, Sweden, Switzer…	Sp. Pl.: 580 (1753)	0	L.	0	Linné, Carl von;Linnaeus, Carl
Stellaria aquatica	Cerastium aquaticum	1753	1771	(L.) Scop.	Albania, Altay, Austria, Baltic States, Belarus, Belgium, Bulgaria, Central European Rus, China North-Central, China South-Central, China Southeast, Corse, Czechoslovakia, Denmark, East European Russia, Finland, France, Germany, Greece, Hainan, Hungary, Inner Mongolia, Iran, Italy, Kazakhstan, Korea, Krasnoyarsk, Krym, Manchuria, Netherlands, North European Russi, Northwest European R, Norway, Pa…	Fl. Carniol., ed. 2, 1: 319 (1771)	0	L.	0	Linné, Carl von;Linnaeus, Carl
Stellaria dichotoma		1753	1753	L.	Altay, Amur, Buryatiya, China North-Central, Chita, Inner Mongolia, Irkutsk, Kazakhstan, Krasnoyarsk, Manchuria, Mongolia, Qinghai, Tuva, Xinjiang	Sp. Pl.: 421 (1753)	0	L.	0	Linné, Carl von;Linnaeus, Carl
Stellaria graminea		1753	1753	L.	Afghanistan, Albania, Altay, Austria, Baltic States, Belarus, Belgium, Bulgaria, Buryatiya, Central European Rus, China North-Central, China South-Central, Corse, Czechoslovakia, Denmark, East European Russia, Finland, France, Germany, Great Britain, Greece, Hungary, Iran, Ireland, Irkutsk, Italy, Kazakhstan, Krasnoyarsk, Krym, Nepal, Netherlands, North European Russi, Northwest European R, Norwa…	Sp. Pl.: 421 (1753)	0	L.	0	Linné, Carl von;Linnaeus, Carl
Stellaria media	Alsine media	1753	1789	(L.) Vill.	Afghanistan, Albania, Algeria, Altay, Austria, Baleares, Baltic States, Belarus, Belgium, Bulgaria, Buryatiya, Central European Rus, China North-Central, China South-Central, China Southeast, Chita, Corse, Cyprus, Czechoslovakia, Denmark, Djibouti, East Aegean Is., East European Russia, East Himalaya, Egypt, Eritrea, Ethiopia, Finland, France, Føroyar, Germany, Great Britain, Greece, Hungary, Ice…	Hist. Pl. Dauphiné 3: 615 (1789)	0	L.	0	Linné, Carl von;Linnaeus, Carl
Stellaria nemorum		1753	1753	L.	Albania, Austria, Baltic States, Belarus, Belgium, Bulgaria, Central European Rus, China North-Central, Corse, Czechoslovakia, Denmark, East European Russia, Finland, France, Germany, Great Britain, Greece, Hungary, Iran, Italy, Mongolia, Netherlands, North European Russi, Northwest European R, Norway, Poland, Romania, South European Russi, Spain, Sweden, Switzerland, Turkey, Ukraine, Yugoslavia	Sp. Pl.: 421 (1753)	0	L.	0	Linné, Carl von;Linnaeus, Carl
Stellaria radians		1753	1753	L.	Amur, Buryatiya, China North-Central, Chita, Inner Mongolia, Irkutsk, Japan, Kamchatka, Khabarovsk, Korea, Krasnoyarsk, Kuril Is., Magadan, Manchuria, Mongolia, Primorye, Sakhalin, Yakutskiya	Sp. Pl.: 422 (1753)	0	L.	0	Linné, Carl von;Linnaeus, Carl
Stellera chamaejasme		1753	1753	L.	Amur, Buryatiya, China North-Central, China South-Central, Chita, East Himalaya, Inner Mongolia, Korea, Manchuria, Mongolia, Nepal, Qinghai, Tibet, Xinjiang	Sp. Pl.: 559 (1753)	0	L.	0	Linné, Carl von;Linnaeus, Carl
Stipa pennata		1753	1753	L.	Afghanistan, Albania, Altay, Austria, Bulgaria, Buryatiya, Central European Rus, Corse, Czechoslovakia, East European Russia, France, Germany, Greece, Hungary, Iran, Iraq, Irkutsk, Italy, Kazakhstan, Kirgizstan, Krasnoyarsk, Krym, Mongolia, North Caucasus, Pakistan, Poland, Romania, South European Russi, Sweden, Switzerland, Tadzhikistan, Transcaucasus, Turkey, Turkey-in-Europe, Tuva, Ukraine, We…	Sp. Pl.: 78 (1753)	0	L.	0	Linné, Carl von;Linnaeus, Carl
Striga asiatica	Buchnera asiatica	1753	1891	(L.) Kuntze	Aldabra, Andaman Is., Angola, Bangladesh, Benin, Botswana, Burkina, Burundi, Cambodia, Cameroon, Cape Provinces, Central African Repu, Chad, China South-Central, China Southeast, Congo, East Himalaya, Egypt, Ethiopia, Free State, Gabon, Gambia, Ghana, Guinea, Guinea-Bissau, India, Ivory Coast, Kenya, KwaZulu-Natal, Laccadive Is., Lesotho, Liberia, Madagascar, Malawi, Malaya, Mali, Mauritius, Moza…	Revis. Gen. Pl. 2: 466 (1891)	0	L.	0	Linné, Carl von;Linnaeus, Carl
Strigosella africana	Hesperis africana	1753	1972	(L.) Botsch.	Afghanistan, Algeria, Altay, China North-Central, China South-Central, China Southeast, Greece, Gulf States, Inner Mongolia, Iran, Iraq, Italy, Kazakhstan, Kirgizstan, Kriti, Krym, Lebanon-Syria, Libya, Mongolia, Morocco, Oman, Pakistan, Palestine, Qinghai, Saudi Arabia, Sicilia, Sinai, South European Russi, Spain, Tadzhikistan, Tibet, Tunisia, Turkey, Turkey-in-Europe, Turkmenistan, Ukraine, Uzb…	Bot. Zhurn. (Moscow &amp; Leningrad) 57: 1038 (1972)	0	L.	0	Linné, Carl von;Linnaeus, Carl
Stuckenia pectinata	Potamogeton pectinatus	1753	1912	(L.) Börner	Afghanistan, Alabama, Alaska, Albania, Alberta, Aleutian Is., Algeria, Altay, Amur, Angola, Arizona, Arkansas, Assam, Austria, Baleares, Baltic States, Bangladesh, Belarus, Belgium, Belize, Bolivia, Botswana, British Columbia, Bulgaria, Burundi, Buryatiya, California, Cape Provinces, Caprivi Strip, Central American Pac, Central European Rus, Chile Central, China North-Central, China South-Central…	Fl. Deut. Volk: 713 (1912)	0	L.	0	Linné, Carl von;Linnaeus, Carl
Suaeda maritima	Suaeda maritima	1753	1827	(L.) Dumort.	Afghanistan, Albania, Algeria, Austria, Baleares, Baltic States, Bangladesh, Belarus, Belgium, Bulgaria, Canary Is., Cape Verde, Central European Rus, Connecticut, Corse, Cyprus, Czechoslovakia, Denmark, East European Russia, Egypt, Finland, France, Germany, Great Britain, Greece, Gulf States, Hungary, India, Iran, Ireland, Italy, Japan, Korea, Krym, Libya, Maine, Manitoba, Masachusettes, Maurita…	Fl. Belg.: 22 (1827)	0	L.	0	Linné, Carl von;Linnaeus, Carl
Suaeda salsa	Chenopodium salsum	1753	1803	(L.) Pall.	Buryatiya, China North-Central, China Southeast, Hungary, Inner Mongolia, Iran, Kazakhstan, Krym, Manchuria, Mongolia, Primorye, Qinghai, South European Russi, Turkmenistan, Ukraine, Uzbekistan, Xinjiang	Ill. Pl.: 46 (1803)	0	L.	0	Linné, Carl von;Linnaeus, Carl
Suriana maritima		1753	1753	L.	Aldabra, Andaman Is., Aruba, Belize, Bermuda, Brazil Northeast, Cayman Is., Chagos Archipelago, Cocos (Keeling) Is., Colombia, Cook Is., Cuba, Dominican Republic, Fiji, Gilbert Is., Haiti, Honduras, India, Jamaica, Kenya, Laccadive Is., Leeward Is., Lesser Sunda Is., Madagascar, Maldives, Mauritius, Mexico Gulf, Mexico Southeast, Mozambique, Mozambique Channel I, Nauru, Netherlands Antilles, New …	Sp. Pl.: 284 (1753)	0	L.	0	Linné, Carl von;Linnaeus, Carl
Swertia dichotoma		1753	1753	L.	Altay, Buryatiya, China North-Central, China South-Central, Chita, Inner Mongolia, Irkutsk, Japan, Kazakhstan, Kirgizstan, Korea, Krasnoyarsk, Manchuria, Mongolia, Qinghai, Tuva, West Siberia, Xinjiang	Sp. Pl.: 227 (1753)	0	L.	0	Linné, Carl von;Linnaeus, Carl
Syringa persica		1753	1753	L.	Afghanistan, China North-Central, Pakistan, Qinghai, West Himalaya	Sp. Pl.: 9 (1753)	0	L.	0	Linné, Carl von;Linnaeus, Carl
Syzygium cumini	Myrtus cumini	1753	1912	(L.) Skeels	Andaman Is., Assam, Bangladesh, Cambodia, China South-Central, China Southeast, East Himalaya, Hainan, India, Jawa, Laccadive Is., Laos, Lesser Sunda Is., Malaya, Maluku, Myanmar, Nepal, Pakistan, Queensland, Sri Lanka, Sulawesi, Thailand, Vietnam	Bull. Bur. Pl. Industr. U.S.D.A. 248: 25 (1912)	0	L.	0	Linné, Carl von;Linnaeus, Carl
Syzygium jambos	Eugenia jambos	1753	1931	(L.) Alston	Assam, Bangladesh, Borneo, China South-Central, East Himalaya, Laos, Lesser Sunda Is., Malaya, Myanmar, Nepal, Sumatera, Thailand, Vietnam	H.Trimen, Handb. Fl. Ceylon 6(Suppl.): 115 (1931)	0	L.	0	Linné, Carl von;Linnaeus, Carl
Syzygium zeylanicum	Myrtus zeylanica	1753	1828	(L.) DC.	Andaman Is., Bangladesh, Borneo, Cambodia, China Southeast, India, Jawa, Laos, Lesser Sunda Is., Madagascar, Malaya, Myanmar, Sri Lanka, Sulawesi, Sumatera, Thailand, Vietnam	Prodr. 3: 260 (1828)	0	L.	0	Linné, Carl von;Linnaeus, Carl
Tabernaemontana divaricata	Nerium divaricatum	1753	1819	(L.) R.Br. ex Roem. & Schult.	Assam, Bangladesh, Cambodia, China South-Central, East Himalaya, India, Laos, Myanmar, Nepal, Thailand, Vietnam, West Himalaya	Syst. Veg., ed. 15 bis 4: 427 (1819)	0	L.	0	Linné, Carl von;Linnaeus, Carl
Tadehagi triquetrum	Hedysarum triquetrum	1753	1973	(L.) H.Ohashi	Andaman Is., Assam, Bangladesh, Bismarck Archipelago, Cambodia, China South-Central, China Southeast, East Himalaya, Hainan, India, Laos, Malaya, Myanmar, Nansei-shoto, Nepal, New Guinea, Philippines, Sri Lanka, Taiwan, Thailand, Vietnam, West Himalaya	Ginkgoana 1: 290 (1973)	0	L.	0	Linné, Carl von;Linnaeus, Carl
Tanacetum vulgare		1753	1753	L.	Albania, Altay, Amur, Austria, Baltic States, Belarus, Belgium, Bulgaria, Buryatiya, Central European Rus, Chita, Corse, Czechoslovakia, Denmark, East European Russia, Finland, France, Germany, Great Britain, Greece, Hungary, Inner Mongolia, Irkutsk, Italy, Japan, Kamchatka, Kazakhstan, Khabarovsk, Kirgizstan, Korea, Krasnoyarsk, Krym, Kuril Is., Magadan, Manchuria, Mongolia, Netherlands, North C…	Sp. Pl.: 844 (1753)	0	L.	0	Linné, Carl von;Linnaeus, Carl
Tarenna asiatica	Rondeletia asiatica	1753	1902	(L.) Kuntze ex K.Schum.	Andaman Is., Bangladesh, Borneo, India, Japan, Laos, Nansei-shoto, Sri Lanka, Taiwan, Thailand, Vietnam	Bot. Tidsskr. 24: 332 (1902)	0	L.	0	Linné, Carl von;Linnaeus, Carl
Teloxys aristata	Chenopodium aristatum	1753	1834	(L.) Moq.	Altay, Amur, Buryatiya, China North-Central, China South-Central, China Southeast, Chita, East European Russia, Inner Mongolia, Irkutsk, Kazakhstan, Kirgizstan, Korea, Krasnoyarsk, Manchuria, Mongolia, Nepal, North European Russi, Primorye, Qinghai, South European Russi, Tibet, Tuva, West Siberia, Xinjiang, Yakutskiya	Ann. Sci. Nat., Bot., sér. 2, 1: 289 (1834)	0	L.	0	Linné, Carl von;Linnaeus, Carl
Tephrosia purpurea	Cracca purpurea	1753	1807	(L.) Pers.	Algeria, Angola, Assam, Bangladesh, Benin, Botswana, Burkina, Burundi, Cambodia, Cameroon, Cape Provinces, Cape Verde, Caprivi Strip, Central African Repu, Chad, China South-Central, China Southeast, Congo, Djibouti, East Himalaya, Egypt, Eritrea, Ethiopia, Fiji, Free State, Gambia, Ghana, Guinea-Bissau, Gulf of Guinea Is., Gulf States, Hainan, India, Iran, Ivory Coast, Jawa, Kenya, KwaZulu-Natal…	Syn. Pl. 2: 329 (1807)	0	L.	0	Linné, Carl von;Linnaeus, Carl
Teucrium scordium		1753	1753	L.	Afghanistan, Albania, Algeria, Austria, Baleares, Baltic States, Belarus, Belgium, Bulgaria, Central European Rus, China North-Central, Corse, Cyprus, Czechoslovakia, Denmark, East Aegean Is., Eritrea, Ethiopia, France, Germany, Great Britain, Greece, Hungary, Iran, Ireland, Italy, Kazakhstan, Kirgizstan, Kriti, Krym, Lebanon-Syria, Morocco, Netherlands, North Caucasus, Northwest European R, Paki…	Sp. Pl.: 565 (1753)	0	L.	0	Linné, Carl von;Linnaeus, Carl
Thalictrum alpinum		1753	1753	L.	Afghanistan, Alaska, Altay, Austria, British Columbia, Buryatiya, California, Chita, Colorado, East European Russia, East Himalaya, Finland, France, Føroyar, Great Britain, Greenland, Iceland, Idaho, Ireland, Irkutsk, Italy, Kamchatka, Kazakhstan, Khabarovsk, Kirgizstan, Krasnoyarsk, Kuril Is., Labrador, Magadan, Mongolia, Montana, Myanmar, Nepal, Nevada, New Mexico, Newfoundland, North European …	Sp. Pl.: 545 (1753)	0	L.	0	Linné, Carl von;Linnaeus, Carl
Thalictrum flavum		1753	1753	L.	Albania, Altay, Austria, Baltic States, Belarus, Belgium, Bulgaria, Buryatiya, Central European Rus, Czechoslovakia, Denmark, East European Russia, Finland, Germany, Great Britain, Hungary, Ireland, Irkutsk, Italy, Kazakhstan, Kirgizstan, Krasnoyarsk, Netherlands, North European Russi, Northwest European R, Norway, Poland, Romania, South European Russi, Spain, Sweden, Switzerland, Transcaucasus, …	Sp. Pl.: 546 (1753)	0	L.	0	Linné, Carl von;Linnaeus, Carl
Thalictrum foetidum		1753	1753	L.	Afghanistan, Altay, Amur, Austria, Bulgaria, Buryatiya, China North-Central, China South-Central, Chita, Czechoslovakia, East European Russia, East Himalaya, France, Greece, Hungary, Inner Mongolia, Iran, Irkutsk, Italy, Kazakhstan, Khabarovsk, Kirgizstan, Krasnoyarsk, Magadan, Mongolia, Pakistan, Primorye, Qinghai, Romania, Spain, Switzerland, Tadzhikistan, Tibet, Transcaucasus, Turkey, Tuva, Uk…	Sp. Pl.: 545 (1753)	0	L.	0	Linné, Carl von;Linnaeus, Carl
Thalictrum minus		1753	1753	L.	Afghanistan, Algeria, Altay, Amur, Austria, Baltic States, Bulgaria, Buryatiya, Central European Rus, China North-Central, Chita, Czechoslovakia, Denmark, East European Russia, Germany, Hungary, Iran, Irkutsk, Italy, Kamchatka, Kazakhstan, Khabarovsk, Kirgizstan, Krasnoyarsk, Krym, Kuril Is., Lebanon-Syria, Magadan, Manchuria, Mongolia, Morocco, Northwest European R, Pakistan, Poland, Primorye, Q…	Sp. Pl.: 546 (1753)	0	L.	0	Linné, Carl von;Linnaeus, Carl
Thelypteris parasitica	Polypodium parasiticum	1753	1938	(L.) Tardieu	Assam, Bangladesh, Borneo, Caroline Is., China South-Central, China Southeast, Fiji, Hainan, India, Japan, Kazan-retto, Korea, Laos, Lesser Sunda Is., Malaya, Maluku, Marianas, Myanmar, Nansei-shoto, New Caledonia, New Guinea, Norfolk Is., Ogasawara-shoto, Philippines, Pitcairn Is., Queensland, Samoa, Sri Lanka, St.Helena, Sulawesi, Taiwan, Thailand, Tonga, Tuamotu, Tubuai Is., Uganda, Vietnam, Z…	Notul. Syst. (Paris) 7: 75 (1938)	0	L.	0	Linné, Carl von;Linnaeus, Carl
Thespesia populnea	Hibiscus populneus	1753	1807	(L.) Sol. ex Corrêa	Aldabra, Andaman Is., Bangladesh, Cambodia, China Southeast, Cocos (Keeling) Is., Eritrea, Fiji, Gilbert Is., Hainan, India, Jawa, Kenya, Laccadive Is., Lesser Sunda Is., Malaya, Maldives, Mauritius, Mozambique, Mozambique Channel I, Myanmar, Nansei-shoto, Nauru, New Caledonia, New Guinea, Nicobar Is., Niue, Oman, Philippines, Pitcairn Is., Rodrigues, Réunion, Samoa, Seychelles, Solomon Is., Sout…	Ann. Mus. Hist. Nat. 9: 290 (1807)	0	L.	0	Linné, Carl von;Linnaeus, Carl
[truncated: 30,657 more rows]
